# Supplementary material for: Catalytic enantioselective hydrophosphinylation of in situ-generated indole-derived vinylogous imines to access 3-(1-diphenylphosphoryl-arylmethyl)indoles
Source: Royal Society of Chemistry journal article supplement (doi:10.1039/d2cc04763b), 2022-01-01
Supplement: d2cc04763b1.pdf [file d2cc04763b1.pdf]

**Catalytic enantioselective hydrophosphinylation of in situ generated  
indole-derived vinylogous imines to access  
3-(1-diphenylphosphoryl-arylmethyl)indoles**

Yun-Qing Jia,<sup>abc</sup> Jian-Qiang Zhao,<sup>\*b</sup> Zhen-Hua Wang,<sup>b</sup> Yong You,<sup>b</sup> Yan-Ping Zhang,<sup>b</sup> Xin Jin,<sup>d</sup>  
Ming-Qiang Zhou,<sup>ac</sup> Zhen-Zhen Ge<sup>ac</sup> and Wei-Cheng Yuan<sup>\*ab</sup>

<sup>a</sup>National Engineering Research Center of Chiral Drugs, Chengdu Institute of Organic Chemistry,  
Chinese Academy of Sciences, Chengdu, 610041, China

<sup>b</sup>Innovation Research Center of Chiral Drugs, Institute for Advanced Study, Chengdu University,  
Chengdu 610106, China

<sup>c</sup>University of Chinese Academy of Sciences, Beijing, 100049, China

<sup>d</sup>Zhejiang Jinhua Conba Bio-Pharm. Co. Ltd., Jinhua, 321016, China

zhaojianqiang@cdu.edu.cn

yuanwc@cioc.ac.cn

**Supporting Information**

**Table of Contents**

|                                                                                                              |     |
|--------------------------------------------------------------------------------------------------------------|-----|
| 1. General information.....                                                                                  | S1  |
| 2. General procedure for the synthesis of <b>3</b> .....                                                     | S1  |
| 3. Scale-up experiment.....                                                                                  | S19 |
| 4. X-ray crystal data for compounds <b>3s</b> .....                                                          | S19 |
| 5. Proposed reaction mechanism.....                                                                          | S20 |
| 6. <sup>1</sup> H NMR, <sup>13</sup> C NMR, <sup>31</sup> P NMR and HPLC spectra of compounds <b>3</b> ..... | S21 |

## 1. General information

Reagents were purchased from commercial sources and were used as received unless mentioned otherwise. Reactions were monitored by TLC.  $^1\text{H}$  NMR and  $^{13}\text{C}$  NMR spectra were recorded in  $\text{CDCl}_3$  or  $\text{DMSO}-d_6$ .  $^1\text{H}$  NMR chemical shifts are reported in ppm relative to tetramethylsilane (TMS) with the solvent resonance employed as the internal standard ( $\text{CDCl}_3$  at 7.26 ppm,  $\text{DMSO}-d_6$  at 2.50 ppm). Data are reported as follows: chemical shift, multiplicity (s = singlet, br s = broad singlet, d = doublet, t = triplet, q = quartet, m = multiplet), coupling constants (Hz) and integration.  $^{13}\text{C}$  NMR chemical shifts are reported in ppm from tetramethylsilane (TMS) with the solvent resonance as the internal standard ( $\text{CDCl}_3$  at 77.16 ppm,  $\text{DMSO}-d_6$  at 39.52 ppm). The enantiomeric excesses were determined by chiral HPLC analysis. HPLC analysis was performed on Shimadzu SCL-10AVP HPLC systems and Agilent 1260 Infinity II consisting of the followings: pump, LC-10AD and G7129A; detector, SPD-10A and G7114A measured at 254 nm. Melting points products were recorded on a Büchi Melting Point B-545. The HRMS were recorded by Agilent 6545 LC/Q-TOF mass spectrometer.

## 2. General procedure for the synthesis of 3

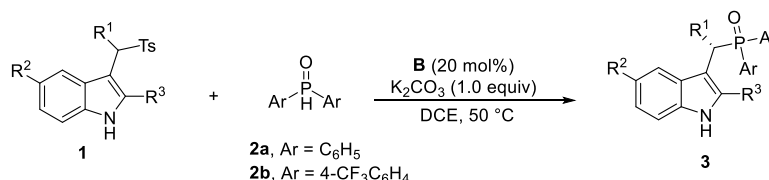

In an ordinary vial equipped with a magnetic stirring bar, diarylphosphine oxides **2** (0.11 mmol, 1.1 equiv) were added to a solution of arylsulfonyl indoles **1** (0.10 mmol, 1.0 equiv), catalyst **B** (20 mol%) and  $\text{K}_2\text{CO}_3$  (0.10 mmol, 1.0 equiv) in 1,2-dichloroethane (1 mL) at 50 °C. And then, the mixture was stirred at the same temperature for the specified time. After completion of the reaction, as indicated by TLC, the products **3** were isolated by flash chromatography on silica gel (petroleum ether/ethyl acetate/dichloromethane = 6/1/1 ~ 2/1/1).

### (S)-((2-methyl-1H-indol-3-yl)(phenyl)methyl)diphenylphosphine oxide (3a)

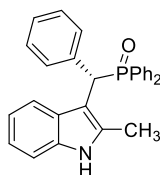

It was purified by flash chromatography (petroleum ether/EtOAc/DCM = 3:1:1) to afford white solid (31.6 mg, 75% yield, 87% ee);  $[\alpha]_{\text{D}}^{20} = -1.8$  ( $c$  1.00,  $\text{CH}_2\text{Cl}_2$ ); m.p. 140.7-141.1 °C; The ee was determined by HPLC (Chiralpak AD-H, *i*-PrOH/hexane = 25/75, flow rate 1.0 mL/min,  $\lambda$  = 254 nm,  $t_{\text{major}}$  = 10.0 min,  $t_{\text{minor}}$  = 19.7 min);

$^1\text{H}$  NMR (300 MHz,  $\text{DMSO}-d_6$ )  $\delta$  10.74 (s, 1H), 8.35 – 8.27 (m, 1H), 8.01 – 7.91 (m, 2H), 7.78 – 7.68 (m, 2H), 7.60 – 7.53 (m, 2H), 7.42 (d,  $J$  = 6.8 Hz, 3H), 7.35 – 7.25 (m, 3H), 7.16 – 7.00 (m, 4H), 6.94 – 6.86 (m, 2H), 5.47 (d,  $J$  = 11.9 Hz, 1H), 2.42 (s, 3H).

$^{13}\text{C}$  NMR (75 MHz,  $\text{CDCl}_3$ )  $\delta$  137.4 (d,  $J$  = 2.8 Hz), 135.2, 133.6 (d,  $J$  = 7.9 Hz), 133.3 (d,  $J$  = 94.5 Hz), 133.1 (d,  $J$  = 99.7 Hz), 131.5 (d,  $J$  = 8.3 Hz), 131.4, 131.3 (d,  $J$  = 2.3 Hz), 131.1 (d,  $J$  = 8.8 Hz), 130.1 (d,  $J$  = 6.8 Hz), 128.5 (d,  $J$  = 11.2 Hz), 128.4, 128.3, 128.0 (d,  $J$  = 11.5 Hz), 126.6, 120.9, 119.7, 119.3, 110.2, 107.3 (d,  $J$  = 5.1 Hz), 45.0 (d,  $J$  = 69.8 Hz), 12.8.

**<sup>31</sup>P NMR (243 MHz, DMSO-*d*<sub>6</sub>)** δ 27.16.

**HRMS (ESI-TOF)** calcd. for C<sub>28</sub>H<sub>24</sub>NONaP [M + Na]<sup>+</sup> 444.1488; found: 444.1493.

**(S)-((2-methyl-1H-indol-3-yl)(phenyl)methyl)bis(4-(trifluoromethyl)phenyl)phosphine oxide (3b)**

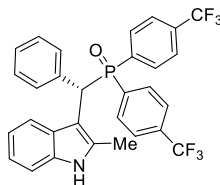

It was purified by flash chromatography (petroleum ether/EtOAc/DCM = 4:1:1) to afford white solid (46.6 mg, 84% yield, 97% ee); [ $\alpha$ ]<sub>D</sub><sup>20</sup> = -19.9 (*c* 1.00, CH<sub>2</sub>Cl<sub>2</sub>); m.p. 156.2-156.6 °C;

**The ee was determined by HPLC** (Chiralpak AD-H, *i*-PrOH/hexane = 20/80, flow rate 1.0 mL/min,  $\lambda$  = 254 nm, *t*<sub>major</sub> = 15.0 min, *t*<sub>minor</sub> = 18.7 min);

**<sup>1</sup>H NMR (400 MHz, DMSO-*d*<sub>6</sub>)** δ 10.82 (s, 1H), 8.30 – 8.21 (m, 3H), 8.05 – 7.95 (m, 2H), 7.81 (d, *J* = 8.0 Hz, 2H), 7.71 (d, *J* = 8.0 Hz, 2H), 7.58 (d, *J* = 7.6 Hz, 2H), 7.20 – 7.14 (m, 2H), 7.13 – 7.02 (m, 2H), 6.91 (dd, *J* = 6.4, 3.3 Hz, 2H), 5.68 (d, *J* = 11.8 Hz, 1H), 2.44 (s, 3H).

**<sup>13</sup>C NMR (101 MHz, DMSO-*d*<sub>6</sub>)** δ 138.1 (d, *J* = 90.5 Hz), 138.0 (d, *J* = 94.9 Hz), 137.7 (d, *J* = 2.1 Hz), 135.0, 134.1 (d, *J* = 9.4 Hz), 132.2 (d, *J* = 9.2 Hz), 131.6 (qd, *J* = 32.3, 2.6 Hz, 2C), 131.5 (d, *J* = 9.2 Hz), 129.6 (d, *J* = 7.2 Hz), 128.2, 127.5 (d, *J* = 4.0 Hz), 126.6, 125.4 – 124.9 (m, 2C), 123.7 (q, *J* = 273.0 Hz), 123.6 (q, *J* = 273.4 Hz), 120.5, 120.2, 118.4, 110.2, 105.9 (d, *J* = 4.6 Hz), 43.0 (d, *J* = 71.0 Hz), 12.1.

**<sup>31</sup>P NMR (162 MHz, DMSO-*d*<sub>6</sub>)** δ 28.92.

**<sup>19</sup>F NMR (376 MHz, DMSO-*d*<sub>6</sub>)** δ -61.69, -61.68.

**HRMS (ESI-TOF)** calcd. for C<sub>30</sub>H<sub>23</sub>F<sub>6</sub>NOP [M + H]<sup>+</sup> 558.1416; found: 558.1421.

**(R)-((2-fluorophenyl)(2-methyl-1H-indol-3-yl)methyl)bis(4-(trifluoromethyl)phenyl)phosphine oxide (3c)**

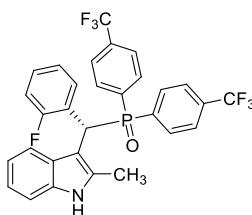

It was purified by flash chromatography (petroleum ether/EtOAc/DCM = 4.5:1:1) to afford white solid (52.3 mg, 91% yield; 97% ee); [ $\alpha$ ]<sub>D</sub><sup>20</sup> = -51.8 (*c* 1.00, CH<sub>2</sub>Cl<sub>2</sub>); m.p. 213.7-214.4 °C;

**The ee was determined by HPLC** (Chiralpak AD-H, *i*-PrOH/hexane = 25/75, flow rate 1.0 mL/min,  $\lambda$  = 254 nm, *t*<sub>major</sub> = 12.1 min, *t*<sub>minor</sub> = 19.8 min);

**<sup>1</sup>H NMR (400 MHz, DMSO-*d*<sub>6</sub>)** δ 10.88 (s, 1H), 8.29 – 8.11 (m, 4H), 8.08 – 7.98 (m, 2H), 7.84 (d, *J* = 7.6 Hz, 2H), 7.69 (d, *J* = 7.7 Hz, 2H), 7.20 – 7.05 (m, 3H), 7.05 – 6.97 (m, 1H), 6.91 (p, *J* = 7.0 Hz, 2H), 5.79 (d, *J* = 11.4 Hz, 1H), 2.37 (s, 3H).

**<sup>13</sup>C NMR (101 MHz, DMSO-*d*<sub>6</sub>)** δ 159.6 (dd, *J* = 245.0, 8.8 Hz), 137.5 (d, *J* = 90.2 Hz), 137.2 (d, *J* = 96.9 Hz), 135.0, 134.4 (d, *J* = 9.0 Hz), 132.0 (d, *J* = 9.2 Hz), 131.7 (d, *J* = 9.3 Hz), 131.6 (qd, *J* = 31.3, 2.7 Hz, 2C), 131.4, 129.0 (d, *J* = 8.1 Hz), 127.4 (d, *J* = 2.8 Hz), 125.5 - 125.4 (m), 125.2

- 125.0 (m), 124.4 (d,  $J = 14.7$  Hz), 124.1 (d,  $J = 3.0$  Hz), 123.7 (q,  $J = 273.7$  Hz), 123.6 (q,  $J = 273.7$  Hz), 120.2, 120.1, 118.5, 115.3 (d,  $J = 22.3$  Hz), 110.4, 104.2 (d,  $J = 4.6$  Hz), 35.5 (d,  $J = 72.7$  Hz), 11.9.

$^{31}\text{P}$  NMR (162 MHz, DMSO- $d_6$ )  $\delta$  28.84.

$^{19}\text{F}$  NMR (376 MHz,  $\text{CDCl}_3$ )  $\delta$  -63.20, -63.27, -117.76.

HRMS (ESI-TOF) calcd. for  $\text{C}_{30}\text{H}_{22}\text{F}_7\text{NOP}$   $[\text{M} + \text{H}]^+$  576.1322; found: 576.1317.

**(S)-((4-fluorophenyl)(2-methyl-1H-indol-3-yl)methyl)bis(4-(trifluoromethyl)phenyl)phosphine oxide (3d)**

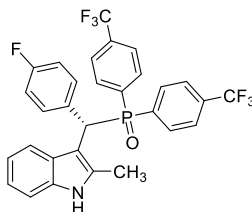

It was purified by flash chromatography (petroleum ether/EtOAc/DCM = 4:1:1) to afford white solid (55.4 mg, 96% yield; 97% ee);  $[\alpha]_{\text{D}}^{20} = -20.1$  ( $c$  1.00,  $\text{CH}_2\text{Cl}_2$ ); m.p. 192.2-192.5 °C; The ee was determined by HPLC (Chiralpak AD-H, EtOH/hexane = 20/80, flow rate 1.0 mL/min,  $\lambda = 254$  nm,  $t_{\text{major}} = 5.4$  min,  $t_{\text{minor}} = 6.3$  min);

$^1\text{H}$  NMR (400 MHz, DMSO- $d_6$ )  $\delta$  10.85 (s, 1H), 8.30 – 8.17 (m, 3H), 8.04 – 7.93 (m, 2H), 7.83 (d,  $J = 7.9$  Hz, 2H), 7.71 (d,  $J = 7.8$  Hz, 2H), 7.64 – 7.56 (m, 2H), 7.12 (d,  $J = 7.3$  Hz, 1H), 7.06 – 6.97 (m, 2H), 6.96 – 6.86 (m, 2H), 5.70 (d,  $J = 11.9$  Hz, 1H), 2.44 (s, 3H).

$^{13}\text{C}$  NMR (101 MHz, DMSO- $d_6$ )  $\delta$  160.9 (d,  $J = 242.9$  Hz), 137.9 (d,  $J = 90.1$  Hz), 137.7 (d,  $J = 95.3$  Hz), 135.1, 134.2 (d,  $J = 9.4$  Hz), 133.9, 132.3 (d,  $J = 9.3$  Hz), 131.8 (qd,  $J = 31.8, 2.9$  Hz, 2C), 131.6, 131.5 (d,  $J = 4.1$  Hz), 127.4 (d,  $J = 3.9$  Hz), 125.6 – 125.0 (m, 2C), 123.7 (q,  $J = 274.7$  Hz), 123.6 (q,  $J = 273.7$  Hz), 120.3 (d,  $J = 14.0$  Hz), 115.1 (d,  $J = 21.3$  Hz), 114.9, 110.3, 105.8 (d,  $J = 4.4$  Hz), 42.2 (d,  $J = 70.6$  Hz), 12.1.

$^{31}\text{P}$  NMR (162 MHz, DMSO- $d_6$ )  $\delta$  29.11.

$^{19}\text{F}$  NMR (376 MHz,  $\text{CDCl}_3$ )  $\delta$  -63.17, -63.29, -115.02.

HRMS (ESI-TOF) calcd. for  $\text{C}_{30}\text{H}_{22}\text{F}_7\text{NOP}$   $[\text{M} + \text{H}]^+$  576.1322 ; found: 576.1318.

**(R)-((2-chlorophenyl)(2-methyl-1H-indol-3-yl)methyl)bis(4-(trifluoromethyl)phenyl)phosphine oxide (3e)**

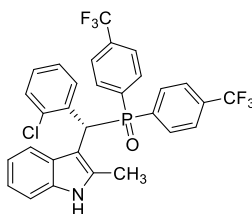

It was purified by flash chromatography (petroleum ether / EtOAc/DCM = 3:1:1) to afford white solid (47.9 mg, 81% yield; 98% ee);  $[\alpha]_{\text{D}}^{20} = -128.5$  ( $c$  1.00,  $\text{CH}_2\text{Cl}_2$ ); m.p. 222.8-223.4 °C; The ee was determined by HPLC (Chiralpak AD-H, EtOH/hexane = 20/80, flow rate 1.0 mL/min,  $\lambda = 254$  nm,  $t_{\text{major}} = 10.9$  min,  $t_{\text{minor}} = 22.2$  min);



**<sup>1</sup>H NMR (400 MHz, CDCl<sub>3</sub>)** δ 10.88 (s, 1H), 8.40 (d, *J* = 7.8 Hz, 1H), 8.10 (m, 2H), 7.97 (d, *J* = 7.9 Hz, 1H), 7.95 – 7.87 (m, 2H), 7.85 (d, *J* = 8.0 Hz, 2H), 7.70 (d, *J* = 7.8 Hz, 2H), 7.38 – 7.23 (m, 2H), 7.15 (dd, *J* = 18.0, 8.0 Hz, 2H), 6.88 (dt, *J* = 24.5, 7.2 Hz, 2H), 5.71 (d, *J* = 11.2 Hz, 1H), 2.25 (s, 3H).

**<sup>13</sup>C NMR (101 MHz, CDCl<sub>3</sub>)** δ 137.2 (d, *J* = 89.1 Hz), 136.8 (d, *J* = 98.1 Hz), 135.0, 134.8 (d, *J* = 8.6 Hz), 134.6, 133.3 (d, *J* = 10.1 Hz), 132.0 (d, *J* = 9.1 Hz), 131.9 (d, *J* = 9.2 Hz), 131.7 (qd, *J* = 32.3, 2.8 Hz, 2C), 129.7, 128.8, 127.5 (d, *J* = 3.6 Hz), 126.9, 125.6 – 125.4 (m), 125.1 – 125.0 (m), 123.6 (q, *J* = 275.5 Hz), 123.5 (q, *J* = 271.5 Hz), 120.2, 120.0, 118.5, 110.4, 103.1 (d, *J* = 5.2 Hz), 40.2 (d, *J* = 79.8 Hz), 12.2.

**<sup>31</sup>P NMR (162 MHz, CDCl<sub>3</sub>)** δ 32.15.

**<sup>19</sup>F NMR (376 MHz, CDCl<sub>3</sub>)** δ -56.92, -56.99.

**HRMS (ESI-TOF)** calcd. for C<sub>30</sub>H<sub>22</sub><sup>35</sup>Cl F<sub>6</sub>NOP [M + H]<sup>+</sup> 592.1026, found: 592.1024; calcd. for C<sub>30</sub>H<sub>22</sub><sup>37</sup>Cl F<sub>6</sub>NOP [M + H]<sup>+</sup> 594.1011, found: 594.1007.

**(R)-((2-chlorophenyl)(2-methyl-1H-indol-3-yl)methyl)diphenylphosphine oxide (3f)**

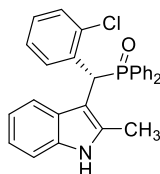

It was purified by flash chromatography (petroleum ether/MTBE = 2:1) to afford white solid (25.9 mg, 57% yield; 94% ee); [α]<sub>D</sub><sup>20</sup> = -79.1 (c 1.00, CH<sub>2</sub>Cl<sub>2</sub>); m.p. 133.2-133.7 °C;

**The ee was determined by HPLC** (Chiralpak AD-H, *i*-PrOH/hexane = 30/70, flow rate 1.0 mL/min, λ = 254 nm, *t*<sub>major</sub> = 7.4 min, *t*<sub>minor</sub> = 15.5 min);

**<sup>1</sup>H NMR (300 MHz, DMSO-*d*<sub>6</sub>)** δ 10.81 (s, 1H), 8.47 (d, *J* = 7.2 Hz, 1H), 8.09 – 7.89 (m, 1H), 7.78 (dd, *J* = 9.8, 7.7 Hz, 2H), 7.67 – 7.54 (m, 2H), 7.51 – 7.36 (m, 4H), 7.36 – 7.18 (m, 4H), 7.13 (d, *J* = 7.3 Hz, 2H), 6.96 – 6.75 (m, 2H), 5.56 (d, *J* = 11.2 Hz, 1H), 2.22 (s, 3H).

**<sup>13</sup>C NMR (101 MHz, DMSO-*d*<sub>6</sub>)** δ 135.5, 135.0, 133.9 (d, *J* = 94.8 Hz), 133.8 (d, *J* = 102.2 Hz), 133.2 (d, *J* = 5.6 Hz), 132.5, 132.3, 132.1 (d, *J* = 5.3 Hz), 131.5 (d, *J* = 11.4 Hz), 130.8 (d, *J* = 9.1 Hz), 130.7, 129.4, 128.5 (d, *J* = 11.0 Hz), 128.4, 128.2 (d, *J* = 11.3 Hz), 127.6 (d, *J* = 3.3 Hz), 126.7, 120.4, 119.9, 118.3, 110.2, 104.0 (d, *J* = 5.0 Hz), 40.4 (d, *J* = 71.1 Hz), 12.1.

**<sup>31</sup>P NMR (243 MHz, DMSO-*d*<sub>6</sub>)** δ 31.05.

**HRMS (ESI-TOF)** calcd. for C<sub>28</sub>H<sub>24</sub><sup>35</sup>ClNOP [M + H]<sup>+</sup> 456.1284, found: 456.1281; calcd. for C<sub>28</sub>H<sub>24</sub><sup>37</sup>ClNOP [M + H]<sup>+</sup> 458.1249, found: 458.1263.

**(S)-((3-chlorophenyl)(2-methyl-1H-indol-3-yl)methyl)bis(4-(trifluoromethyl)phenyl)phosphine oxide (3g)**

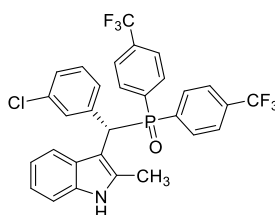

It was purified by flash chromatography (petroleum ether/MTBE = 2:1) to afford white solid (57.3 mg, 97% yield; 95% ee);  $[\alpha]_D^{20} = -23.53$  (*c* 1.00, CH<sub>2</sub>Cl<sub>2</sub>); m.p. 126.6-127.0 °C;

**The ee was determined by HPLC** (Chiralpak AD-H, EtOH/hexane = 25/75, flow rate 1.0 mL/min,  $\lambda = 254$  nm,  $t_{\text{major}} = 7.6$  min,  $t_{\text{minor}} = 5.2$  min);

**<sup>1</sup>H NMR (400 MHz, DMSO-*d*<sub>6</sub>)**  $\delta$  10.89 (s, 1H), 8.31 – 8.16 (m, 3H), 8.05 – 7.93 (m, 2H), 7.85 (d, *J* = 7.6 Hz, 2H), 7.73 (d, *J* = 7.5 Hz, 2H), 7.55 (s, 2H), 7.24 – 7.18 (m, 1H), 7.18 – 7.10 (m, 2H), 6.98 – 6.87 (m, 2H), 5.72 (d, *J* = 11.6 Hz, 1H), 2.43 (s, 3H).

**<sup>13</sup>C NMR (101 MHz, DMSO-*d*<sub>6</sub>)**  $\delta$  140.1 (d, *J* = 1.9 Hz), 137.6 (d, *J* = 90.2 Hz), 137.4 (d, *J* = 95.5 Hz), 135.1, 134.5 (d, *J* = 9.3 Hz), 132.6, 132.3 (d, *J* = 9.2 Hz), 131.9 (qd, *J* = 30.9, 2.0 Hz, 2C), 131.5 (d, *J* = 9.0 Hz), 130.1, 129.4 (d, *J* = 7.3 Hz), 128.2 (d, *J* = 6.7 Hz), 127.4 (d, *J* = 3.6 Hz), 126.7, 125.6 – 125.0 (m, 2C), 123.7 (q, *J* = 273.7 Hz), 123.6 (q, *J* = 274.0 Hz), 120.3, 118.6, 110.4, 105.2 (d, *J* = 4.6 Hz), 42.7 (d, *J* = 70.3 Hz), 12.1.

**<sup>31</sup>P NMR (162 MHz, CDCl<sub>3</sub>)**  $\delta$  29.66.

**<sup>19</sup>F NMR (376 MHz, CDCl<sub>3</sub>)**  $\delta$  -63.21, -63.30.

**HRMS (ESI-TOF)** calcd. for C<sub>30</sub>H<sub>22</sub><sup>35</sup>Cl F<sub>6</sub>NOP [M + H]<sup>+</sup> 592.1026, found: 592.1032; calcd. for C<sub>30</sub>H<sub>22</sub><sup>37</sup>Cl F<sub>6</sub>NOP [M + H]<sup>+</sup> 594.1011, found: 594.1015.

**(S)-((4-chlorophenyl)(2-methyl-1H-indol-3-yl)methyl)bis(4-(trifluoromethyl)phenyl)phosphine oxide (3h)**

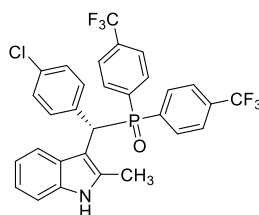

It was purified by flash chromatography (petroleum ether/EtOAc/DCM = 4:1:1) to afford white solid (48.5 mg, 82% yield; 97% ee);  $[\alpha]_D^{20} = -15.9$  (*c* 1.00, CH<sub>2</sub>Cl<sub>2</sub>); m.p. 134.4-134.8 °C;

**The ee was determined by HPLC** (Chiralpak AD-H, EtOH/hexane = 20/80, flow rate 1.0 mL/min,  $\lambda = 254$  nm,  $t_{\text{major}} = 7.0$  min,  $t_{\text{minor}} = 10.1$  min);

**<sup>1</sup>H NMR (400 MHz, DMSO-*d*<sub>6</sub>)**  $\delta$  10.87 (s, 1H), 8.37 – 8.18 (m, 3H), 8.02 – 7.93 (m, 2H), 7.84 (d, *J* = 7.7 Hz, 2H), 7.71 (d, *J* = 7.7 Hz, 2H), 7.59 (d, *J* = 6.9 Hz, 2H), 7.24 (d, *J* = 8.0 Hz, 2H), 7.13 (d, *J* = 5.9 Hz, 1H), 6.97 – 6.86 (m, 2H), 5.72 (d, *J* = 11.4 Hz, 1H), 2.43 (s, 3H).

**<sup>13</sup>C NMR (101 MHz, DMSO-*d*<sub>6</sub>)**  $\delta$  137.8 (d, *J* = 90.3 Hz), 137.6 (d, *J* = 95.7 Hz), 136.8 (d, *J* = 1.8 Hz), 135.1, 134.3 (d, *J* = 9.2 Hz), 132.3 (d, *J* = 9.2 Hz), 131.8 (qd, *J* = 15.4, 3.8 Hz, 2C), 131.5, 131.4 (d, *J* = 7.3 Hz), 128.3, 127.4 (d, *J* = 3.5 Hz), 125.6 - 125.3 (m), 125.2 - 125.0 (m), 123.7 (q, *J* = 273.4 Hz), 123.6 (q, *J* = 273.4 Hz), 120.3, 118.5, 110.3, 105.4 (d, *J* = 4.5 Hz), 42.4 (d, *J* = 70.6 Hz), 12.1.

**<sup>31</sup>P NMR (162 MHz, DMSO-*d*<sub>6</sub>)**  $\delta$  28.93.

**<sup>19</sup>F NMR (376 MHz, DMSO-*d*<sub>6</sub>)**  $\delta$  -61.67, -61.76.

**HRMS (ESI-TOF)** calcd. for C<sub>30</sub>H<sub>22</sub><sup>35</sup>Cl F<sub>6</sub>NOP [M + H]<sup>+</sup> 592.1026, found: 592.1034; calcd. for C<sub>30</sub>H<sub>22</sub><sup>37</sup>Cl F<sub>6</sub>NOP [M + H]<sup>+</sup> 594.1011, found: 594.1016.

**(S)-((4-bromophenyl)(2-methyl-1H-indol-3-yl)methyl)diphenylphosphine oxide (3i)**

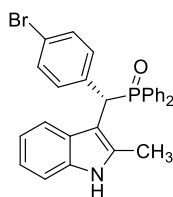

It was purified by flash chromatography (petroleum ether/EtOAc/DCM = 3:1:1) to afford white solid (31.0 mg, 62% yield; 84% ee);  $[\alpha]_{\text{D}}^{20} = -5.8$  ( $c$  1.00,  $\text{CH}_2\text{Cl}_2$ ); m.p. 155.8-156.3 °C;

**The ee was determined by HPLC** (Chiralpak AD-H, *i*-PrOH/hexane = 25/75, flow rate 1.0 mL/min,  $\lambda$  = 254 nm,  $t_{\text{major}}$  = 11.1 min,  $t_{\text{minor}}$  = 21.4 min);

**$^1\text{H}$  NMR (600 MHz,  $\text{DMSO}-d_6$ )**  $\delta$  10.80 (s, 1H), 8.26 (d,  $J$  = 7.6 Hz, 1H), 8.02 – 7.92 (m, 2H), 7.73 (dd,  $J$  = 10.0, 8.0 Hz, 2H), 7.53 (d,  $J$  = 8.3 Hz, 2H), 7.48 – 7.43 (m, 3H), 7.37 – 7.32 (m, 3H), 7.31 – 7.28 (m, 2H), 7.12 (d,  $J$  = 7.7 Hz, 1H), 6.91 (m, 2H), 5.49 (d,  $J$  = 11.6 Hz, 1H), 2.41 (s, 3H).

**$^{13}\text{C}$  NMR (151 MHz,  $\text{DMSO}-d_6$ )**  $\delta$  138.1 (d,  $J$  = 1.3 Hz), 135.1, 133.9, 133.6 (d,  $J$  = 83.4 Hz), 133.5 (d,  $J$  = 98.1 Hz), 131.9 (d,  $J$  = 6.6 Hz), 131.4, 131.3, 131.2 (d,  $J$  = 8.6 Hz), 130.9, 130.4 (d,  $J$  = 8.6 Hz), 128.9 (d,  $J$  = 12.7 Hz), 128.5 (d,  $J$  = 10.9 Hz), 128.2 (d,  $J$  = 11.2 Hz), 127.6, 120.1, 119.6, 118.4, 110.2, 106.3 (d,  $J$  = 4.3 Hz), 42.8 (d,  $J$  = 69.3 Hz), 12.1.

**$^{31}\text{P}$  NMR (243 MHz,  $\text{DMSO}-d_6$ )**  $\delta$  29.94.

**HRMS (ESI-TOF)** calcd. for  $\text{C}_{28}\text{H}_{24}^{79}\text{BrNOP}$   $[\text{M} + \text{H}]^+$  500.0780, found: 500.0779; calcd. for  $\text{C}_{28}\text{H}_{24}^{81}\text{BrNOP}$   $[\text{M} + \text{H}]^+$  502.0753; found: 502.0763.

**(S)-((4-iodophenyl)(2-methyl-1H-indol-3-yl)methyl)bis(4-(trifluoromethyl)phenyl)phosphine oxide (3j)**

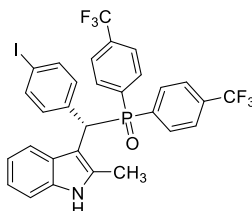

It was purified by flash chromatography (petroleum ether/EtOAc/DCM = 5:1:1) to afford orange solid (63.6 mg, 93% yield; 99% ee);  $[\alpha]_{\text{D}}^{20} = -7.9$  ( $c$  1.00,  $\text{CH}_2\text{Cl}_2$ ); m.p. 141.2-141.5 °C;

**The ee was determined by HPLC** (Chiralpak AD-H, EtOH/hexane = 20/80, flow rate 1.0 mL/min,  $\lambda$  = 254 nm,  $t_{\text{major}}$  = 6.4 min,  $t_{\text{minor}}$  = 12.2 min);

**$^1\text{H}$  NMR (400 MHz,  $\text{DMSO}-d_6$ )**  $\delta$  10.85 (s, 1H), 8.33 – 8.22 (m, 2H), 8.19 (d,  $J$  = 7.2 Hz, 1H), 8.02 – 7.91 (m, 2H), 7.84 (d,  $J$  = 7.9 Hz, 2H), 7.70 (d,  $J$  = 7.9 Hz, 2H), 7.54 (d,  $J$  = 7.9 Hz, 2H), 7.37 (d,  $J$  = 7.9 Hz, 2H), 7.11 (d,  $J$  = 7.3 Hz, 1H), 6.90 (p,  $J$  = 7.0 Hz, 2H), 5.67 (d,  $J$  = 11.5 Hz, 1H), 2.40 (s, 3H).

**$^{13}\text{C}$  NMR (101 MHz,  $\text{DMSO}-d_6$ )**  $\delta$  137.8 (d,  $J$  = 89.9 Hz), 137.7 (d,  $J$  = 95.7 Hz), 137.6 (d,  $J$  = 1.8 Hz), 137.0, 135.1, 134.3 (d,  $J$  = 9.1 Hz), 132.2 (d,  $J$  = 9.2 Hz), 131.9 (d,  $J$  = 7.1 Hz), 131.7 (qd,  $J$  = 32.1, 2.5 Hz), 131.5 (d,  $J$  = 9.1 Hz), 127.4 (d,  $J$  = 3.8 Hz), 125.6 - 125.3 (m), 125.3 - 125.0 (m), 123.7 (q,  $J$  = 273.7 Hz), 123.6 (q,  $J$  = 274.0 Hz), 120.3, 118.5, 110.3, 105.4 (d,  $J$  = 4.7 Hz), 92.8, 42.4 (d,  $J$  = 70.2 Hz), 12.1.

**$^{31}\text{P}$  NMR (162 MHz,  $\text{CDCl}_3$ )**  $\delta$  29.52.

**$^{19}\text{F}$  NMR (376 MHz,  $\text{CDCl}_3$ )**  $\delta$  -63.15, -63.28.

**HRMS (ESI-TOF)** calcd. for C<sub>30</sub>H<sub>22</sub>F<sub>6</sub>INOP [M + H]<sup>+</sup> 684.0382; found: 684.0384.

**Methyl (S)-4-((bis(4-(trifluoromethyl)phenyl)phosphoryl)(2-methyl-1H-indol-3-yl)methyl)benzoate (3k)**

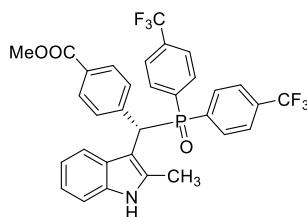

It was purified by flash chromatography (petroleum ether/EtOAc/DCM = 4:1:1) to afford red solid (55.9 mg, 91% yield; 97% ee); [ $\alpha$ ]<sub>D</sub><sup>20</sup> = -13.5 (*c* 1.00, CH<sub>2</sub>Cl<sub>2</sub>); m.p. 150.4-150.8 °C;

**The ee was determined by HPLC** (Chiralpak AD-H, EtOH/hexane = 25/75, flow rate 1.0 mL/min,  $\lambda$  = 254 nm, *t*<sub>major</sub> = 5.4 min, *t*<sub>minor</sub> = 8.5 min);

**<sup>1</sup>H NMR (400 MHz, DMSO-*d*<sub>6</sub>)**  $\delta$  10.88 (s, 1H), 8.29 – 8.15 (m, 3H), 8.05 – 7.95 (m, 2H), 7.82 (d, *J* = 7.7 Hz, 2H), 7.76 (d, *J* = 7.9 Hz, 2H), 7.74 – 7.67 (m, 4H), 7.12 (d, *J* = 7.0 Hz, 1H), 6.91 (p, *J* = 7.2 Hz, 2H), 5.80 (d, *J* = 11.3 Hz, 1H), 3.74 (s, 3H), 2.41 (s, 3H).

**<sup>13</sup>C NMR (101 MHz, DMSO-*d*<sub>6</sub>)**  $\delta$  166.0, 143.3, 137.7 (d, *J* = 89.7 Hz), 137.5 (d, *J* = 95.4 Hz), 135.1, 134.5 (d, *J* = 9.1 Hz), 132.3 (d, *J* = 9.3 Hz), 131.9 (qd, *J* = 32.3, 2.6 Hz, 2C), 131.6 (d, *J* = 9.2 Hz), 130.0 (d, *J* = 7.1 Hz), 129.1, 127.9, 127.5 (d, *J* = 3.4 Hz), 125.5 – 125.1 (m, 2C), 123.7 (q, *J* = 273.7 Hz), 123.6 (q, *J* = 273.7 Hz), 120.3, 118.6, 110.3, 105.0 (d, *J* = 5.0 Hz), 52.1, 43.1 (d, *J* = 71.0 Hz), 12.2.

**<sup>31</sup>P NMR (162 MHz, DMSO-*d*<sub>6</sub>)**  $\delta$  28.78.

**<sup>19</sup>F NMR (376 MHz, DMSO-*d*<sub>6</sub>)**  $\delta$  -61.68, -61.75.

**HRMS (ESI-TOF)** calcd. for C<sub>32</sub>H<sub>25</sub>F<sub>6</sub>NO<sub>3</sub>P [M + H]<sup>+</sup> 616.1471; found: 616.1472.

**(S)-((2-methyl-1H-indol-3-yl)(4-nitrophenyl)methyl)bis(4-(trifluoromethyl)phenyl)phosphine oxide (3l)**

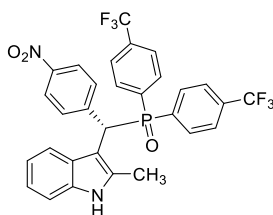

It was purified by flash chromatography (petroleum ether/EtOAc/DCM, 4:1:1) to afford yellow solid (56.1 mg, 93% yield; 90% ee); [ $\alpha$ ]<sub>D</sub><sup>20</sup> = +5.1 (*c* 1.00, CH<sub>2</sub>Cl<sub>2</sub>); m.p. 132.1-132.3 °C;

**The ee was determined by HPLC** (Chiralpak AD-H, EtOH/hexane = 25/75, flow rate 1.0 mL/min,  $\lambda$  = 254 nm, *t*<sub>major</sub> = 5.5 min, *t*<sub>minor</sub> = 11.5 min);

**<sup>1</sup>H NMR (400 MHz, DMSO-*d*<sub>6</sub>)**  $\delta$  10.94 (s, 1H), 8.38 – 8.17 (m, 3H), 8.12 – 7.94 (m, 4H), 7.84 (d, *J* = 8.3 Hz, 4H), 7.72 (d, *J* = 7.9 Hz, 2H), 7.24 – 7.04 (m, 1H), 6.93 (dd, *J* = 6.5, 3.0 Hz, 2H), 5.91 (d, *J* = 11.5 Hz, 1H), 2.44 (s, 3H).

**<sup>13</sup>C NMR (101 MHz, DMSO-*d*<sub>6</sub>)**  $\delta$  146.1, 145.6 (d, *J* = 1.8 Hz), 137.4 (d, *J* = 90.5 Hz), 137.2 (d, *J* = 96.8 Hz), 135.1, 134.8 (d, *J* = 8.9 Hz), 132.3 (d, *J* = 9.3 Hz), 131.9 (qd, *J* = 31.1, 3.4 Hz, 2C), 131.6 (d, *J* = 9.3 Hz), 130.8 (d, *J* = 6.9 Hz), 127.3 (d, *J* = 4.4 Hz), 125.8 - 125.4 (m), 125.4 - 125.1

(m), 123.7 (q,  $J = 273.7$  Hz), 123.6 (q,  $J = 273.7$  Hz), 123.5, 122.3 (d,  $J = 8.3$  Hz), 120.4, 118.7, 110.4, 104.7 (d,  $J = 4.8$  Hz), 43.0 (d,  $J = 69.8$  Hz), 12.1.

**$^{31}\text{P}$  NMR (162 MHz, DMSO- $d_6$ )**  $\delta$  28.73.

**$^{19}\text{F}$  NMR (376 MHz, DMSO- $d_6$ )**  $\delta$  -61.75, -61.81.

**HRMS (ESI-TOF)** calcd. for  $\text{C}_{30}\text{H}_{22}\text{F}_6\text{N}_2\text{O}_3\text{P}$   $[\text{M} + \text{H}]^+$  603.1267; found: 603.1274.

**(R)-((2,5-dichlorophenyl)(2-methyl-1H-indol-3-yl)methyl)bis(4-(trifluoromethyl)phenyl) phosphine oxide (3m)**

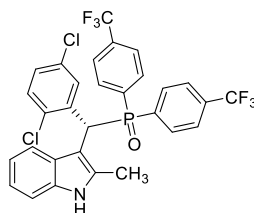

It was purified by flash chromatography (petroleum ether/EtOAc/DCM = 6:1:1) to afford white solid (55.9 mg, 89% yield; 99% ee);  $[\alpha]_{\text{D}}^{20} = -69.7$  (c 1.00,  $\text{CH}_2\text{Cl}_2$ ); m.p. 137.1-137.5 °C;

**The ee was determined by HPLC** (Chiralpak AD-H, EtOH/hexane = 20/80, flow rate 1.0 mL/min,  $\lambda = 254$  nm,  $t_{\text{major}} = 6.3$  min,  $t_{\text{minor}} = 8.1$  min);

**$^1\text{H}$  NMR (400 MHz,  $\text{CDCl}_3$ )**  $\delta$  8.43 (s, 1H), 8.07 (s, 1H), 7.94 – 7.79 (m, 3H), 7.69 (d,  $J = 8.0$  Hz, 2H), 7.63 (t,  $J = 9.4$  Hz, 2H), 7.48 (d,  $J = 7.9$  Hz, 2H), 7.19 – 7.13 (m, 2H), 7.11 – 6.99 (m, 3H), 5.53 (d,  $J = 11.4$  Hz, 1H), 2.34 (s, 3H).

**$^{13}\text{C}$  NMR (101 MHz,  $\text{CDCl}_3$ )**  $\delta$  136.5, 135.9 (d,  $J = 93.4$  Hz), 135.5 (d,  $J = 93.6$  Hz), 134.2 (d,  $J = 7.8$  Hz), 133.9, 133.8 (qd,  $J = 35.3, 3.0$  Hz, 2C), 133.1 (d,  $J = 1.2$  Hz), 132.4 (d,  $J = 5.2$  Hz), 132.2 (d,  $J = 9.6$  Hz), 131.9 (d,  $J = 9.2$  Hz), 131.6 (d,  $J = 9.2$  Hz), 130.7, 129.0, 128.1 (d,  $J = 4.3$  Hz), 125.7 (dq,  $J = 11.4, 3.7$  Hz), 125.2 (dq,  $J = 11.6, 3.7$  Hz), 123.7 (q,  $J = 273.7$  Hz), 123.5 (q,  $J = 273.7$  Hz), 121.7, 120.2, 119.7, 110.3, 104.3 (d,  $J = 5.4$  Hz), 41.0 (d,  $J = 71.2$  Hz), 13.1.

**$^{31}\text{P}$  NMR (162 MHz,  $\text{CDCl}_3$ )**  $\delta$  30.36.

**$^{19}\text{F}$  NMR (376 MHz,  $\text{CDCl}_3$ )**  $\delta$  -63.21, -63.29.

**HRMS (ESI-TOF)** calcd. for  $\text{C}_{30}\text{H}_{21}^{35}\text{Cl}_2\text{F}_6\text{NOP}$   $[\text{M} + \text{H}]^+$  626.0637, found: 626.0639; calcd. for  $\text{C}_{30}\text{H}_{21}^{35}\text{Cl}$   $^{37}\text{ClF}_6\text{NOP}$   $[\text{M} + \text{H}]^+$  628.0615, found: 628.0618; calcd. for  $\text{C}_{30}\text{H}_{21}^{37}\text{Cl}_2\text{F}_6\text{NOP}$   $[\text{M} + \text{H}]^+$  630.0602, found: 630.0602.

**(S)-([1,1'-biphenyl]-4-yl(2-methyl-1H-indol-3-yl)methyl)bis(4-(trifluoromethyl)phenyl) phosphine oxide (3n)**

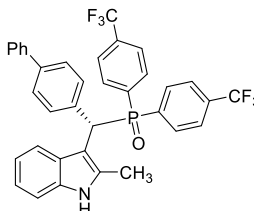

It was purified by flash chromatography (petroleum ether/EtOAc/DCM = 4:1:1) to afford white solid (62.5 mg, 99% yield; 97% ee);  $[\alpha]_{\text{D}}^{20} = +8.1$  (c 1.00,  $\text{CH}_2\text{Cl}_2$ ); m.p. 130.2-130.6 °C;

**The ee was determined by HPLC** (Chiralpak AD-H, *i*-PrOH/hexane = 20/80, flow rate 1.0 mL/min,  $\lambda = 254$  nm,  $t_{\text{major}} = 6.7$  min,  $t_{\text{minor}} = 9.5$  min);

**<sup>1</sup>H NMR (400 MHz, DMSO-*d*<sub>6</sub>)**  $\delta$  10.86 (s, 1H), 8.37 – 8.28 (m, 3H), 8.00 (d, *J* = 8.9 Hz, 2H), 7.84 (d, *J* = 7.6 Hz, 2H), 7.75 – 7.64 (m, 4H), 7.51 (dd, *J* = 19.0, 7.6 Hz, 4H), 7.41 – 7.32 (m, 2H), 7.29 (d, *J* = 7.1 Hz, 1H), 7.13 (s, 1H), 6.98 – 6.89 (m, 2H), 5.76 (d, *J* = 10.9 Hz, 1H), 2.49 (s, 3H).  
**<sup>13</sup>C NMR (101 MHz, DMSO-*d*<sub>6</sub>)**  $\delta$  139.4, 138.2, 138.1 (d, *J* = 89.6 Hz), 138.0 (d, *J* = 95.1 Hz), 137.0 (d, *J* = 2.0 Hz), 135.1, 134.2 (d, *J* = 9.4 Hz), 132.3 (d, *J* = 9.2 Hz), 131.7 (qd, *J* = 32.3, 3.0 Hz, 2C), 131.5 (d, *J* = 9.1 Hz), 130.2 (d, *J* = 7.0 Hz), 128.9, 127.5 (d, *J* = 3.8 Hz), 127.4, 126.5, 126.4, 125.5 – 125.3 (m), 125.2 – 125.0 (m), 123.7 (q, *J* = 273.7 Hz), 123.6 (q, *J* = 273.7 Hz), 120.5, 120.2, 118.5, 110.3, 105.9 (d, *J* = 4.4 Hz), 42.6 (d, *J* = 71.1 Hz), 12.2.  
**<sup>31</sup>P NMR (162 MHz, CDCl<sub>3</sub>)**  $\delta$  29.93.  
**<sup>19</sup>F NMR (376 MHz, CDCl<sub>3</sub>)**  $\delta$  -63.12, -63.23.  
**HRMS (ESI-TOF)** calcd. for C<sub>36</sub>H<sub>27</sub>F<sub>6</sub>NOP [M + H]<sup>+</sup> 634.1729; found: 634.1731.

**(S)-((2-methyl-1H-indol-3-yl)(m-tolyl)methyl)bis(4-(trifluoromethyl)phenyl)phosphine oxide (3o)**

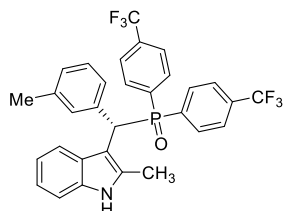

It was purified by flash chromatography (petroleum ether/EtOAc/DCM = 4:1:1) to afford white solid (57.0 mg, 99% yield; 97% ee);  $[\alpha]_D^{20}$  = -34.4 (c 1.00, CH<sub>2</sub>Cl<sub>2</sub>); m.p. 124.4-124.9 °C;  
**The ee was determined by HPLC** (Chiralpak AD-H, *i*-PrOH/hexane = 20/80, flow rate 1.0 mL/min,  $\lambda$  = 254 nm,  $t_{\text{major}}$  = 11.7 min,  $t_{\text{minor}}$  = 20.7 min);  
**<sup>1</sup>H NMR (400 MHz, DMSO-*d*<sub>6</sub>)**  $\delta$  10.82 (s, 1H), 8.39 – 8.13 (m, 3H), 8.04 – 7.94 (m, 2H), 7.81 (d, *J* = 7.3 Hz, 2H), 7.70 (d, *J* = 7.7 Hz, 2H), 7.43 (d, *J* = 6.8 Hz, 1H), 7.29 (s, 1H), 7.11 (d, *J* = 6.3 Hz, 1H), 7.08 – 6.99 (m, 1H), 6.95 – 6.82 (m, 3H), 5.63 (d, *J* = 11.6 Hz, 1H), 2.43 (s, 3H), 2.10 (s, 3H).  
**<sup>13</sup>C NMR (101 MHz, DMSO-*d*<sub>6</sub>)**  $\delta$  138.2 (d, *J* = 89.9 Hz), 138.0 (d, *J* = 89.9 Hz), 137.6 (d, *J* = 2.5 Hz), 137.1, 135.0, 134.1 (d, *J* = 9.3 Hz), 132.2 (d, *J* = 9.1 Hz), 131.6 (qd, *J* = 32.3, 2.0 Hz, 2C), 131.5 (d, *J* = 9.1 Hz), 130.4 (d, *J* = 7.5 Hz), 128.0, 127.6 (d, *J* = 3.2 Hz), 127.3, 126.7 (d, *J* = 6.8 Hz), 125.7 – 124.3 (m, 2C), 123.8 (q, *J* = 273.7), 123.7 (q, *J* = 273.7), 120.5, 120.2, 118.4, 110.2, 105.9 (d, *J* = 4.6 Hz), 43.0 (d, *J* = 70.8 Hz), 21.0, 12.2.  
**<sup>31</sup>P NMR (162 MHz, CDCl<sub>3</sub>)**  $\delta$  30.05.  
**<sup>19</sup>F NMR (376 MHz, CDCl<sub>3</sub>)**  $\delta$  -63.17, -63.25.  
**HRMS (ESI-TOF)** calcd. for C<sub>31</sub>H<sub>25</sub>F<sub>6</sub>NOP [M + H]<sup>+</sup> 572.1572; found: 572.1575.

**(S)-((2-methyl-1H-indol-3-yl)(p-tolyl)methyl)bis(4-(trifluoromethyl)phenyl)phosphine oxide (3p)**

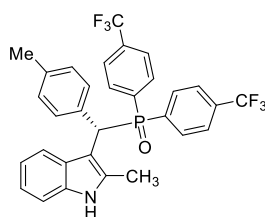

It was purified by flash chromatography (petroleum ether/EtOAc/DCM = 5:1:1) to afford white solid (42.7 mg, 75% yield; 91% ee);  $[\alpha]_D^{20} = -25.9$  ( $c$  1.00, CH<sub>2</sub>Cl<sub>2</sub>); m.p. 134.0-134.4 °C; **The ee was determined by HPLC** (Chiralpak AD-H, *i*-PrOH/hexane = 25/75, flow rate 1.0 mL/min,  $\lambda$  = 254 nm,  $t_{\text{major}}$  = 9.5 min,  $t_{\text{minor}}$  = 12.4 min);

**<sup>1</sup>H NMR (400 MHz, DMSO-*d*<sub>6</sub>)**  $\delta$  10.80 (s, 1H), 8.41 – 8.17 (m, 3H), 8.05 – 7.92 (m, 2H), 7.82 (d,  $J$  = 7.9 Hz, 2H), 7.69 (d,  $J$  = 7.9 Hz, 2H), 7.46 (d,  $J$  = 7.7 Hz, 2H), 7.10 (d,  $J$  = 7.3 Hz, 1H), 6.96 (d,  $J$  = 7.6 Hz, 2H), 6.94 – 6.81 (m, 2H), 5.64 (d,  $J$  = 11.7 Hz, 1H), 2.41 (s, 3H), 2.12 (s, 3H).

**<sup>13</sup>C NMR (101 MHz, DMSO-*d*<sub>6</sub>)**  $\delta$  138.2 (d,  $J$  = 91.4 Hz), 138.1 (d,  $J$  = 94.4 Hz), 135.6, 135.0, 134.7 (d,  $J$  = 2.1 Hz), 134.0 (d,  $J$  = 9.4 Hz), 132.2 (d,  $J$  = 9.1 Hz), 131.5 (qd,  $J$  = 31.3, 2.5 Hz, 2C), 131.4 (d,  $J$  = 9.0 Hz), 129.5 (d,  $J$  = 7.2 Hz), 128.8, 127.6 (d,  $J$  = 4.0 Hz), 125.6 – 124.7 (m, 2C), 123.7 (q,  $J$  = 273.7 Hz), 123.6 (q,  $J$  = 273.7 Hz), 120.5, 120.1, 118.4, 110.2, 106.1 (d,  $J$  = 4.4 Hz), 42.5 (d,  $J$  = 70.9 Hz), 20.5, 12.1.

**<sup>31</sup>P NMR (162 MHz, DMSO-*d*<sub>6</sub>)**  $\delta$  28.88.

**<sup>19</sup>F NMR (376 MHz, CDCl<sub>3</sub>)**  $\delta$  -63.14, -63.25.

**HRMS (ESI-TOF)** calcd. for C<sub>31</sub>H<sub>24</sub>F<sub>6</sub>NOPNa [M + Na]<sup>+</sup> 594.1392; found: 594.1386.

**(R)-((2-methoxyphenyl)(2-methyl-1H-indol-3-yl)methyl)diphenylphosphine oxide (3q)**

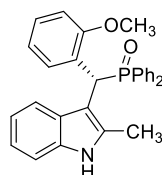

It was purified by flash chromatography (petroleum ether/EtOAc/DCM = 4:1:1) to afford yellow solid (22.6 mg, 50% yield; 86% ee);  $[\alpha]_D^{20} = -46.0$  ( $c$  1.00, CH<sub>2</sub>Cl<sub>2</sub>); m.p. 148.9-149.1 °C; **The ee was determined by HPLC** (Chiralpak AD-H, *i*-PrOH/hexane = 25/75, flow rate 1.0 mL/min,  $\lambda$  = 254 nm,  $t_{\text{major}}$  = 11.9 min,  $t_{\text{minor}}$  = 27.9 min);

**<sup>1</sup>H NMR (300 MHz, DMSO-*d*<sub>6</sub>)**  $\delta$  10.68 (s, 1H), 8.26 – 8.19 (m, 1H), 8.15 (d,  $J$  = 7.8 Hz, 1H), 7.78 – 7.68 (m, 2H), 7.66 – 7.57 (m, 2H), 7.45 – 7.35 (m, 3H), 7.35 – 7.26 (m, 3H), 7.12 – 7.01 (m, 2H), 6.92 – 6.86 (m, 2H), 6.84 – 6.75 (m, 2H), 5.75 (d,  $J$  = 12.0 Hz, 1H), 3.63 (s, 3H), 2.33 (s, 3H).

**<sup>13</sup>C NMR (101 MHz, DMSO-*d*<sub>6</sub>)**  $\delta$  156.0 (d,  $J$  = 7.5 Hz), 135.1, 133.9 (d,  $J$  = 9.5 Hz), 133.8 (d,  $J$  = 93.8 Hz), 133.7 (d,  $J$  = 97.5 Hz), 131.3, 130.9 (d,  $J$  = 5.1 Hz), 130.7 (d,  $J$  = 8.6 Hz), 130.5 (d,  $J$  = 8.6 Hz), 128.4, 128.3, 128.2, 127.9, 127.8, 126.3, 120.8, 120.7, 120.0 (d,  $J$  = 5.6 Hz), 118.3, 110.7, 110.2, 106.1 (d,  $J$  = 4.1 Hz), 55.5, 35.2 (d,  $J$  = 72.3 Hz), 11.9.

**<sup>31</sup>P NMR (162 MHz, DMSO-*d*<sub>6</sub>)**  $\delta$  30.99.

**HRMS (ESI-TOF)** calcd. for C<sub>29</sub>H<sub>27</sub>NO<sub>2</sub>P [M + H]<sup>+</sup> 452.1779; found: 452.1765.

**(S)-((4-methoxyphenyl)(2-methyl-1H-indol-3-yl)methyl)bis(4-(trifluoromethyl)phenyl)phosphine oxide (3r)**

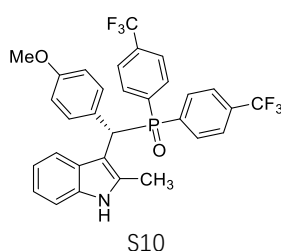

It was purified by flash chromatography (petroleum ether/EtOAc/DCM = 4:1:1) to afford white solid (58.0 mg, 99% yield; 91% ee);  $[\alpha]_D^{20} = -51.8$  ( $c$  1.00, CH<sub>2</sub>Cl<sub>2</sub>); m.p. 213.7-213.9 °C; **The ee was determined by HPLC** (Chiralpak AD-H, EtOH/hexane = 20/80, flow rate 1.0 mL/min,  $\lambda$  = 254 nm,  $t_{\text{major}}$  = 7.7 min,  $t_{\text{minor}}$  = 9.5 min);

**<sup>1</sup>H NMR (400 MHz, DMSO-*d*<sub>6</sub>)**  $\delta$  10.81 (s, 1H), 8.35 – 8.18 (m, 3H), 8.07 – 7.94 (m, 2H), 7.82 (d,  $J$  = 7.7 Hz, 2H), 7.69 (d,  $J$  = 7.6 Hz, 2H), 7.51 (d,  $J$  = 6.7 Hz, 2H), 7.11 (s, 1H), 6.95 – 6.87 (m, 2H), 6.73 (d,  $J$  = 7.9 Hz, 2H), 5.63 (d,  $J$  = 11.7 Hz, 1H), 3.60 (s, 3H), 2.44 (s, 3H).

**<sup>13</sup>C NMR (101 MHz, DMSO-*d*<sub>6</sub>)**  $\delta$  157.8, 138.3 (d,  $J$  = 90.3 Hz), 138.1 (d,  $J$  = 93.9 Hz), 135.1, 133.9 (d,  $J$  = 9.5 Hz), 132.2 (d,  $J$  = 9.1 Hz), 131.6 (qd,  $J$  = 30.3, 2.0 Hz, 2C), 131.5 (d,  $J$  = 9.0 Hz), 130.7 (d,  $J$  = 7.1 Hz), 130.1, 129.6 (d,  $J$  = 2.2 Hz), 127.5 (d,  $J$  = 3.8 Hz), 125.6 – 124.9 (m, 2C), 123.7 (q,  $J$  = 273.7 Hz), 123.6 (q,  $J$  = 273.7 Hz), 120.2, 118.4, 113.6, 110.2, 106.3 (d,  $J$  = 4.2 Hz), 54.9, 42.1 (d,  $J$  = 71.1 Hz), 12.1.

**<sup>31</sup>P NMR (162 MHz, DMSO-*d*<sub>6</sub>)**  $\delta$  29.09.

**<sup>19</sup>F NMR (376 MHz, DMSO-*d*<sub>6</sub>)**  $\delta$  -61.64, -61.73.

**HRMS (ESI-TOF)** calcd. for C<sub>31</sub>H<sub>24</sub>F<sub>6</sub>NO<sub>2</sub>PNa [M + Na]<sup>+</sup> 610.1341; found: 610.1340.

**(S)-((4-methoxyphenyl)(2-methyl-1H-indol-3-yl)methyl)diphenylphosphine oxide (3s)**

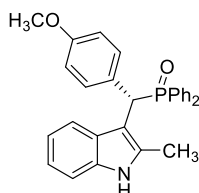

It was purified by flash chromatography (petroleum ether/EtOAc/DCM, 4:1:1) to afford white solid (28.4 mg, 63% yield; 88% ee);  $[\alpha]_D^{20} = -8.4$  ( $c$  1.00, CH<sub>2</sub>Cl<sub>2</sub>); m.p. 110.2-110.5 °C;

**The ee was determined by HPLC** (Chiralpak AD-H, *i*-PrOH/hexane = 40/60, flow rate 1.0 mL/min,  $\lambda$  = 254 nm,  $t_{\text{major}}$  = 7.1 min,  $t_{\text{minor}}$  = 19.6 min);

**<sup>1</sup>H NMR (300 MHz, DMSO-*d*<sub>6</sub>)**  $\delta$  10.74 (s, 1H), 8.37 – 8.25 (m, 1H), 8.08 – 7.90 (m, 2H), 7.80 – 7.67 (m, 2H), 7.56 – 7.40 (m, 5H), 7.37 – 7.21 (m, 3H), 7.15 – 7.08 (m, 1H), 6.95 – 6.87 (m, 2H), 6.71 (d,  $J$  = 8.6 Hz, 2H), 5.43 (d,  $J$  = 12.1 Hz, 1H), 3.59 (s, 3H), 2.42 (s, 3H).

**<sup>13</sup>C NMR (75 MHz, DMSO-*d*<sub>6</sub>)**  $\delta$  157.6, 135.1, 134.1 (d,  $J$  = 93.3 Hz), 134.0 (d,  $J$  = 91.2 Hz), 133.4, 133.5, 131.2 (d,  $J$  = 8.7 Hz), 130.8 (d,  $J$  = 6.7 Hz), 130.5, 130.4, 128.4 (d,  $J$  = 11.1 Hz), 128.1 (d,  $J$  = 11.2 Hz), 127.8 (d,  $J$  = 4.0 Hz), 120.7, 120.0, 118.3, 113.4, 110.1, 107.3 (d,  $J$  = 4.1 Hz), 54.9, 42.4 (d,  $J$  = 70.6 Hz), 12.2.

**<sup>31</sup>P NMR (243 MHz, CDCl<sub>3</sub>)**  $\delta$  31.81.

**HRMS (ESI-TOF)** calcd. for C<sub>29</sub>H<sub>27</sub>NO<sub>2</sub>P [M + H]<sup>+</sup> 452.1779; found: 452.1774.

**(S)-((2-methyl-1H-indol-3-yl)(naphthalen-1-yl)methyl)bis(4-(trifluoromethyl)phenyl)phosphine oxide (3t)**

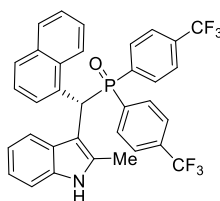



It was purified by flash chromatography (petroleum ether/EtOAc/DCM = 5:1:1) to afford colorless oil (51.5 mg, 85% yield; 95% ee);  $[\alpha]_{\text{D}}^{20} = -354.8$  ( $c$  1.00,  $\text{CH}_2\text{Cl}_2$ );

**The ee was determined by HPLC** (Chiralpak AD-H, *i*-PrOH/hexane = 25/75, flow rate 1.0 mL/min,  $\lambda$  = 254 nm,  $t_{\text{major}}$  = 7.6 min,  $t_{\text{minor}}$  = 14.7 min);

**$^1\text{H}$  NMR (400 MHz,  $\text{CDCl}_3$ )**  $\delta$  8.52 (d,  $J$  = 7.2 Hz, 1H), 8.45 (s, 1H), 7.89 – 7.82 (m, 3H), 7.77 (d,  $J$  = 8.2 Hz, 1H), 7.70 (d,  $J$  = 8.3 Hz, 1H), 7.57 (d,  $J$  = 8.0 Hz, 2H), 7.48 – 7.39 (m, 2H), 7.38 – 7.29 (m, 4H), 7.29 – 7.22 (m, 2H), 7.07 (d,  $J$  = 8.0 Hz, 1H), 6.97 – 6.89 (m, 1H), 6.84 – 6.76 (m, 1H), 5.73 (d,  $J$  = 11.0 Hz, 1H), 2.16 (s, 3H).

**$^{13}\text{C}$  NMR (101 MHz,  $\text{CDCl}_3$ )**  $\delta$  137.0 (d,  $J$  = 100.0 Hz), 136.6 (d,  $J$  = 89.9 Hz), 135.6 (d,  $J$  = 6.9 Hz), 134.5, 134.2, 133.6 (qd,  $J$  = 32.6, 2.7 Hz, 2C), 132.2, 132.0 (d,  $J$  = 8.9 Hz), 131.9, 131.8 (d,  $J$  = 9.4 Hz), 129.3 (d,  $J$  = 9.9 Hz), 128.5 (d,  $J$  = 3.5 Hz), 128.3, 126.7, 125.7, 125.8 – 125.5 (m), 125.0 – 124.6 (m), 125.2, 123.5 (q,  $J$  = 273.7 Hz), 123.0, 122.2, 121.0, 119.7, 117.6, 110.3, 103.8 (d,  $J$  = 6.9 Hz), 40.1 (d,  $J$  = 72.7 Hz), 13.2.

**$^{31}\text{P}$  NMR (162 MHz,  $\text{CDCl}_3$ )**  $\delta$  32.15.

**$^{19}\text{F}$  NMR (376 MHz,  $\text{CDCl}_3$ )**  $\delta$  -63.22, -63.27.

**HRMS (ESI-TOF)** calcd. for  $\text{C}_{34}\text{H}_{24}\text{F}_6\text{NOPNa}$   $[\text{M} + \text{Na}]^+$  630.1392; found: 630.1398.

**(S)-((2-methyl-1H-indol-3-yl)(naphthalen-2-yl)methyl)bis(4-(trifluoromethyl)phenyl)phosphine oxide (3u)**

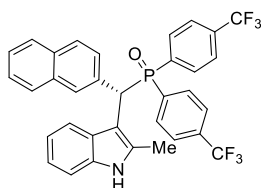

It was purified by flash chromatography (petroleum ether/EtOAc/DCM = 4.5:1:1) to afford white solid (59.0 mg, 97% yield; 96% ee);  $[\alpha]_{\text{D}}^{20} = -63.6$  ( $c$  1.00,  $\text{CH}_2\text{Cl}_2$ ); m.p. 182.7–183.1 °C

**The ee was determined by HPLC** (Chiralpak AD-H, EtOH/hexane = 30/70, flow rate 1.0 mL/min,  $\lambda$  = 254 nm,  $t_{\text{major}}$  = 15.0 min,  $t_{\text{minor}}$  = 8.3 min);

**$^1\text{H}$  NMR (400 MHz,  $\text{DMSO}-d_6$ )**  $\delta$  10.88 (s, 1H), 8.40 – 8.25 (m, 3H), 8.15 (s, 1H), 8.09 – 7.97 (m, 2H), 7.79 (d,  $J$  = 7.5 Hz, 2H), 7.73 (d,  $J$  = 7.3 Hz, 5H), 7.70 – 7.64 (m, 1H), 7.45 – 7.32 (m, 2H), 7.13 (d,  $J$  = 7.7 Hz, 1H), 6.98 – 6.86 (m, 2H), 5.90 (d,  $J$  = 11.5 Hz, 1H), 2.48 (s, 3H).

**$^{13}\text{C}$  NMR (101 MHz,  $\text{DMSO}-d_6$ )**  $\delta$  138.1 (d,  $J$  = 89.8 Hz), 138.0 (d,  $J$  = 95.5 Hz), 135.5, 135.1, 134.3 (d,  $J$  = 9.0 Hz), 132.6, 132.3 (d,  $J$  = 9.2 Hz), 131.8 (qd,  $J$  = 32.3, 2.1 Hz, 2C), 131.6 (d,  $J$  = 8.7 Hz), 131.5, 128.2 (d,  $J$  = 7.3 Hz), 127.9 (d,  $J$  = 7.4 Hz), 127.7, 127.5 (d,  $J$  = 8.8 Hz), 126.3, 125.9, 125.6 – 124.6 (m, 2C), 125.0, 123.8 (q,  $J$  = 274.7 Hz), 123.7 (q,  $J$  = 273.7 Hz), 120.4, 120.2, 118.5, 110.3, 105.7 (d,  $J$  = 4.6 Hz), 43.0 (d,  $J$  = 70.9 Hz), 12.2.

**$^{31}\text{P}$  NMR (162 MHz,  $\text{DMSO}-d_6$ )**  $\delta$  29.06.

**$^{19}\text{F}$  NMR (376 MHz,  $\text{DMSO}-d_6$ )**  $\delta$  -61.71, -61.78.

**HRMS (ESI-TOF)** calcd. for  $\text{C}_{34}\text{H}_{24}\text{F}_6\text{NOPNa}$   $[\text{M} + \text{Na}]^+$  630.1392; found: 630.1391.

**(R)-((2-methyl-1H-indol-3-yl)(thiophen-2-yl)methyl)diphenylphosphine oxide (3v)**

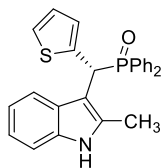

It was purified by flash chromatography (petroleum ether/EtOAc/DCM = 3:1:1) to afford yellow solid (28.2 mg, 66% yield; 83% ee);  $[\alpha]_D^{20} = -55.9$  ( $c$  1.00,  $\text{CH}_2\text{Cl}_2$ ); m.p. 113.7-114.2 °C; **The ee was determined by HPLC** (Chiralpak AD-H, *i*-PrOH/hexane = 25/75, flow rate 1.0 mL/min,  $\lambda$  = 254 nm,  $t_{\text{major}}$  = 10.5 min,  $t_{\text{minor}}$  = 23.5 min);

**$^1\text{H}$  NMR (400 MHz,  $\text{DMSO}-d_6$ )**  $\delta$  10.77 (s, 1H), 8.17 (d,  $J$  = 7.6 Hz, 1H), 8.15 – 8.03 (m, 2H), 7.76 – 7.59 (m, 2H), 7.51 (s, 3H), 7.31 (d,  $J$  = 6.6 Hz, 1H), 7.30 – 7.22 (m, 2H), 7.20 (d,  $J$  = 5.1 Hz, 1H), 7.14 – 7.07 (m, 2H), 6.96 – 6.86 (m, 2H), 6.78 (dd,  $J$  = 5.0, 3.6 Hz, 1H), 5.78 (d,  $J$  = 12.1 Hz, 1H), 2.38 (s, 3H).

**$^{13}\text{C}$  NMR (101 MHz,  $\text{DMSO}-d_6$ )**  $\delta$  140.3 (d,  $J$  = 1.4 Hz), 135.0, 133.9 (d,  $J$  = 8.2 Hz), 133.7 (d,  $J$  = 93.0 Hz), 133.3 (d,  $J$  = 98.3 Hz), 131.5 (d,  $J$  = 2.1 Hz), 131.3, 131.2, 130.4 (d,  $J$  = 8.7 Hz), 128.5 (d,  $J$  = 11.2 Hz), 128.0 (d,  $J$  = 11.1 Hz), 126.7 (d,  $J$  = 6.0 Hz), 127.5 (d,  $J$  = 3.2 Hz), 126.3, 125.0, 124.9, 120.1, 118.1, 110.0, 106.4 (d,  $J$  = 4.4 Hz), 38.7 (d,  $J$  = 66.9 Hz), 12.1.

**$^{31}\text{P}$  NMR (162 MHz,  $\text{DMSO}-d_6$ )**  $\delta$  29.61.

**HRMS (ESI-TOF)** calcd. for  $\text{C}_{26}\text{H}_{23}\text{NOPS}$   $[\text{M} + \text{H}]^+$  428.1238; found: 428.1226.

**(S)-1-(2-methyl-1H-indol-3-yl)pentylbis(4-(trifluoromethyl)phenyl)phosphine oxide**  
(3w)

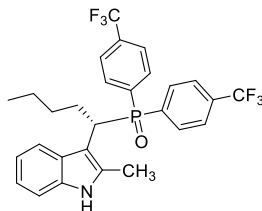

It was purified by flash chromatography (petroleum ether/EtOAc/DCM = 4:1:1) to afford white solid (46.2 mg, 86% yield; 95% ee);  $[\alpha]_D^{20} = -151.3$  ( $c$  1.00,  $\text{CH}_2\text{Cl}_2$ ); m.p. 142.7-143.1 °C; **The ee was determined by HPLC** (Chiralpak IA, EtOH/hexane = 5/95, flow rate 1.0 mL/min,  $\lambda$  = 254 nm,  $t_{\text{major}}$  = 13.2 min,  $t_{\text{minor}}$  = 15.8 min);

**$^1\text{H}$  NMR (400 MHz,  $\text{DMSO}-d_6$ )**  $\delta$  10.91 (s, 1H), 8.69 – 8.52 (m, 2H), 8.26 – 8.12 (m, 3H), 8.06 – 7.96 (m, 2H), 7.88 (d,  $J$  = 7.3 Hz, 2H), 7.38 – 7.29 (m, 1H), 7.18 – 7.03 (m, 2H), 4.35 – 4.23 (m, 1H), 2.87 – 2.77 (m, 1H), 2.40 (s, 3H), 1.93 – 1.77 (m, 1H), 1.35 – 1.13 (m, 4H), 0.84 (t,  $J$  = 6.6 Hz, 3H).

**$^{13}\text{C}$  NMR (101 MHz,  $\text{DMSO}-d_6$ )**  $\delta$  139.0, 138.6 (d,  $J$  = 92.7 Hz), 135.9 (d,  $J$  = 2.9 Hz), 135.4 (d,  $J$  = 96.7 Hz), 132.6 (d,  $J$  = 8.7 Hz), 132.2 (qd,  $J$  = 31.8, 2.1 Hz, 2C), 131.7 (d,  $J$  = 9.1 Hz), 127.5, 126.2 – 125.9 (m), 125.5 – 125.1 (m), 124.3 (q,  $J$  = 273.7 Hz), 124.1 (q,  $J$  = 273.7 Hz), 121.7, 120.5, 118.5, 110.7, 103.8 (d,  $J$  = 6.4 Hz), 37.4 (d,  $J$  = 74.6 Hz), 29.7 (d,  $J$  = 13.1 Hz), 26.7, 21.9, 14.1.

**$^{31}\text{P}$  NMR (162 MHz,  $\text{DMSO}-d_6$ )**  $\delta$  31.04.

**$^{19}\text{F}$  NMR (376 MHz,  $\text{DMSO}-d_6$ )**  $\delta$  -61.64, -61.71.

**HRMS (ESI-TOF)** calcd. for  $\text{C}_{28}\text{H}_{27}\text{F}_6\text{NOP}$   $[\text{M} + \text{H}]^+$  538.1729; found: 538.1732.

**(S)-((2,5-dimethyl-1H-indol-3-yl)(phenyl)methyl)bis(4-(trifluoromethyl)phenyl)phosphine oxide (3x)**

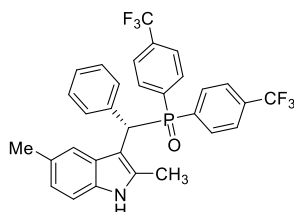

It was purified by flash chromatography (petroleum ether/EtOAc/DCM = 4:1:1) to afford white solid (52.8 mg, 92% yield, 95% ee);  $[\alpha]_{\text{D}}^{20} = -27.3$  ( $c$  1.00,  $\text{CH}_2\text{Cl}_2$ ); m.p. 144.2-144.6 °C;

The ee was determined by HPLC (Chiralpak AD-H, EtOH/hexane = 15/85, flow rate 1.0 mL/min,  $\lambda = 254$  nm,  $t_{\text{major}} = 7.1$  min,  $t_{\text{minor}} = 5.7$  min);

**$^1\text{H}$  NMR (400 MHz,  $\text{DMSO}-d_6$ )**  $\delta$  10.69 (s, 1H), 8.35 – 8.19 (m, 2H), 7.98 (s, 3H), 7.81 (d,  $J = 7.7$  Hz, 2H), 7.70 (d,  $J = 7.6$  Hz, 2H), 7.57 (s, 2H), 7.21 – 7.12 (m, 2H), 7.10 – 7.04 (m, 1H), 7.00 (d,  $J = 7.2$  Hz, 1H), 6.74 (d,  $J = 8.0$  Hz, 1H), 5.65 (d,  $J = 11.4$  Hz, 1H), 2.41 (s, 3H), 2.33 (s, 3H).

**$^{13}\text{C}$  NMR (101 MHz,  $\text{DMSO}-d_6$ )**  $\delta$  138.1 (d,  $J = 94.4$  Hz), 138.0 (d,  $J = 94.9$  Hz), 137.8 (d,  $J = 2.5$  Hz), 134.2 (d,  $J = 9.1$  Hz), 133.4, 132.3 (d,  $J = 9.2$  Hz), 131.6 (qd,  $J = 31.3, 2.6$  Hz, 2C), 131.5 (d,  $J = 9.1$  Hz), 129.7 (d,  $J = 7.1$  Hz), 127.9 (d,  $J = 4.2$  Hz), 128.2, 126.6 (d,  $J = 10.4$  Hz), 125.4 – 124.9 (m, 2C), 123.8 (q,  $J = 272.7$  Hz), 123.7 (q,  $J = 273.7$  Hz), 122.4 (d,  $J = 9.5$  Hz), 121.7, 120.0, 109.9, 105.3 (d,  $J = 4.7$  Hz), 43.0 (d,  $J = 71.0$  Hz), 21.6, 12.3.

**$^{31}\text{P}$  NMR (162 MHz,  $\text{DMSO}-d_6$ )**  $\delta$  28.93.

**$^{19}\text{F}$  NMR (376 MHz,  $\text{DMSO}-d_6$ )**  $\delta$  -61.66, -61.74.

**HRMS (ESI-TOF)** calcd. for  $\text{C}_{31}\text{H}_{25}\text{F}_6\text{NOP}$   $[\text{M} + \text{H}]^+$  572.1572; found: 572.1574.

**(S)-((5-bromo-2-methyl-1H-indol-3-yl)(phenyl)methyl)bis(4-(trifluoromethyl)phenyl)phosphine oxide (3y)**

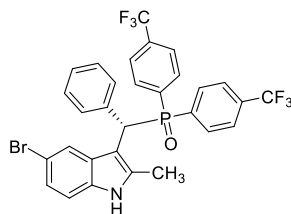

It was purified by flash chromatography (petroleum ether/EtOAc/DCM = 4:1:1) to afford white solid (60.5 mg, 95% yield; 95% ee);  $[\alpha]_{\text{D}}^{20} = -11.2$  ( $c$  1.00,  $\text{CH}_2\text{Cl}_2$ ); m.p. 260.6-260.9 °C;

The ee was determined by HPLC (Chiralpak OJ, EtOH/hexane = 5/95, flow rate 1.0 mL/min,  $\lambda = 254$  nm,  $t_{\text{major}} = 10.3$  min,  $t_{\text{minor}} = 7.1$  min );

**$^1\text{H}$  NMR (400 MHz,  $\text{DMSO}-d_6$ )**  $\delta$  11.08 (s, 1H), 8.42 (s, 1H), 8.33 – 8.19 (m, 2H), 8.05 – 7.92 (m, 2H), 7.82 (d,  $J = 7.8$  Hz, 2H), 7.72 (d,  $J = 7.7$  Hz, 2H), 7.54 (d,  $J = 7.4$  Hz, 2H), 7.22 – 7.14 (m, 2H), 7.11 – 7.05 (m, 2H), 7.02 (d,  $J = 8.5$  Hz, 1H), 5.70 (d,  $J = 11.6$  Hz, 1H), 2.42 (s, 3H).

**$^{13}\text{C}$  NMR (101 MHz,  $\text{DMSO}-d_6$ )**  $\delta$  137.8 (d,  $J = 92.8$  Hz), 137.5 (d,  $J = 2.0$  Hz), 136.2 (d,  $J = 9.2$  Hz), 133.7, 132.3 (d,  $J = 9.3$  Hz), 131.8 (qd,  $J = 32.3, 2.4$  Hz, 2C), 131.5 (d,  $J = 9.2$  Hz), 129.6 (d,  $J = 7.3$  Hz), 129.4 (d,  $J = 3.8$  Hz), 128.3, 126.7, 125.5 – 125.1 (m, 2C), 123.8 (q,  $J = 273.7$  Hz),

123.7 (q,  $J = 273.7$  Hz), 122.7, 122.6, 112.2, 111.4, 105.8 (d,  $J = 4.7$  Hz), 42.7 (d,  $J = 70.4$  Hz), 12.2.

**$^{31}\text{P}$  NMR (162 MHz, DMSO- $d_6$ )**  $\delta$  29.23.

**$^{19}\text{F}$  NMR (376 MHz, DMSO- $d_6$ )**  $\delta$  -61.65, -61.73.

**HRMS (ESI-TOF)** calcd. for  $\text{C}_{28}\text{H}_{22}^{79}\text{BrF}_6\text{NOP}$   $[\text{M} + \text{H}]^+$  636.0521, found: 636.0525; calcd. for  $\text{C}_{28}\text{H}_{22}^{81}\text{BrF}_6\text{NOP}$   $[\text{M} + \text{H}]^+$  638.0505; found: 638.0510.

**(S)-((4-bromo-2-methyl-1H-indol-3-yl)(phenyl)methyl)bis(4-(trifluoromethyl)phenyl)phosphine oxide(3z)**

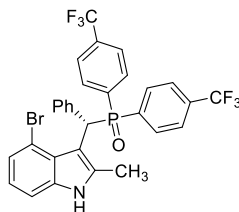

It was purified by flash chromatography (petroleum ether/EtOAc/DCM = 3:1:1) to afford white solid (37.5 mg, 62% yield, 83% ee);  $[\alpha]_{\text{D}}^{20} = 55.6$  (c 1.00,  $\text{CH}_2\text{Cl}_2$ ); m.p. 289.3-289.8 °C;

**The ee was determined by HPLC** (Chiralpak AD-H, EtOH/hexane = 25/75, flow rate 1.0 mL/min,  $\lambda = 254$  nm,  $t_{\text{major}} = 4.6$  min,  $t_{\text{minor}} = 5.5$  min);

**$^1\text{H}$  NMR (400 MHz,  $\text{CDCl}_3$ )**  $\delta$  11.34 (s, 1H), 8.13 (dd,  $J = 10.1, 8.1$  Hz, 2H), 7.92 (d,  $J = 7.1$  Hz, 2H), 7.79 (dd,  $J = 10.5, 8.1$  Hz, 2H), 7.57 (d,  $J = 7.0$  Hz, 2H), 7.49 (d,  $J = 7.8$  Hz, 2H), 7.25 – 7.15 (m, 3H), 7.14 (d,  $J = 7.3$  Hz, 1H), 7.08 (d,  $J = 7.5$  Hz, 1H), 6.87 – 6.80 (m, 2H), 2.61 (s, 3H).

**$^{13}\text{C}$  NMR (101 MHz,  $\text{CDCl}_3$ )**  $\delta$  137.7 (d,  $J = 90.2$  Hz), 137.5 (d,  $J = 5.0$  Hz), 137.4 (d,  $J = 97.1$  Hz), 137.2 (d,  $J = 1.9$  Hz), 136.3, 132.0 (d,  $J = 8.9$  Hz), 131.8 (qd,  $J = 32.2, 2.8$  Hz, 2C), 131.5 (d,  $J = 9.1$  Hz), 129.6 (d,  $J = 7.2$  Hz), 128.5, 126.8, 126.2 – 125.8 (m, 1C), 125.2 – 124.8 (m, 1C), 124.3 (d,  $J = 6.6$  Hz), 124.0, 123.8 (q,  $J = 273.7$  Hz), 123.6 (q,  $J = 274.0$  Hz), 121.6, 111.3, 110.7, 105.7 (d,  $J = 4.9$  Hz), 40.3 (d,  $J = 69.8$  Hz), 14.0.

**$^{31}\text{P}$  NMR (162 MHz,  $\text{CDCl}_3$ )**  $\delta$  33.80.

**$^{19}\text{F}$  NMR (376 MHz,  $\text{CDCl}_3$ )**  $\delta$  -57.01, -57.08.

**HRMS (ESI-TOF)** calcd. for  $\text{C}_{28}\text{H}_{22}^{79}\text{BrF}_6\text{NOP}$   $[\text{M} + \text{H}]^+$  636.0521, found: 636.0526; calcd. for  $\text{C}_{28}\text{H}_{22}^{81}\text{BrF}_6\text{NOP}$   $[\text{M} + \text{H}]^+$  638.0505; found: 638.0507.

**ethyl (S)-3-((bis(4-(trifluoromethyl)phenyl)phosphoryl)(phenyl)methyl)-1H-indole-2-carboxylate (3a')**

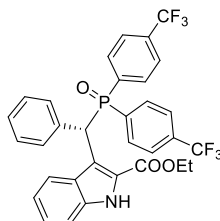

It was purified by flash chromatography (petroleum ether/EtOAc = 5:1) to afford white solid (42.8 mg, 71% yield; 45% ee);  $[\alpha]_{\text{D}}^{20} = -36.4$  (c 1.00,  $\text{CH}_2\text{Cl}_2$ ); m.p. 133.6-133.9 °C;

**The ee was determined by HPLC** (Chiralpak AD-H, EtOH/hexane = 20/80, flow rate 1.0 mL/min,  $\lambda = 254$  nm,  $t_{\text{major}} = 8.3$  min,  $t_{\text{minor}} = 10.2$  min);

**<sup>1</sup>H NMR (400 MHz, DMSO-*d*<sub>6</sub>)** δ 11.76 (s, 1H), 8.53 (d, *J* = 8.3 Hz, 1H), 8.13 – 8.00 (m, 2H), 7.91 (d, *J* = 7.8 Hz, 2H), 7.82 – 7.73 (m, 2H), 7.69 (d, *J* = 7.8 Hz, 2H), 7.60 (d, *J* = 7.5 Hz, 2H), 7.35 (d, *J* = 8.3 Hz, 1H), 7.20 (q, *J* = 6.8 Hz, 3H), 7.16 – 7.01 (m, 2H), 6.85 (d, *J* = 11.1 Hz, 1H), 4.42 (q, *J* = 7.0 Hz, 2H), 1.39 (t, *J* = 7.0 Hz, 3H).

**<sup>13</sup>C NMR (101 MHz, DMSO-*d*<sub>6</sub>)** δ 161.8, 137.2 (d, *J* = 92.6 Hz), 136.9 (d, *J* = 95.7 Hz), 136.5 (d, *J* = 3.5 Hz), 136.3, 132.0 (qd, *J* = 32.5, 2.3 Hz, 2C), 131.8 (d, *J* = 8.9 Hz), 131.2 (d, *J* = 9.0 Hz), 129.7 (d, *J* = 7.0 Hz), 128.6, 127.2, 126.1 – 125.8 (m), 126.0, 125.3 – 125.1 (m), 125.2, 124.0, 123.7 (q, *J* = 273.7 Hz), 123.5 (q, *J* = 273.7 Hz), 123.3 (d, *J* = 9.3 Hz), 120.2, 117.8 (d, *J* = 4.8 Hz), 112.5, 60.9, 42.5 (d, *J* = 70.1 Hz), 14.3.

**<sup>31</sup>P NMR (162 MHz, DMSO-*d*<sub>6</sub>)** δ 28.37.

**<sup>19</sup>F NMR (376 MHz, CDCl<sub>3</sub>)** δ -63.18, -63.26.

**HRMS (ESI-TOF)** calcd. for C<sub>32</sub>H<sub>25</sub>F<sub>6</sub>NO<sub>3</sub>P [M + H]<sup>+</sup> 616.1471; found: 616.1474.

**(S)-((1H-indol-3-yl)(phenyl)methyl)bis(4-(trifluoromethyl)phenyl)phosphine oxide (3b')**

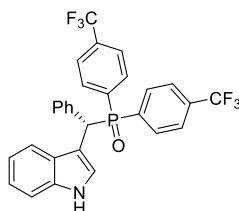

It was purified by flash chromatography (petroleum ether/EtOAc/DCM = 4:1:1) to afford white solid (28.9 mg, 53% yield, 5% ee); [α]<sub>D</sub><sup>20</sup> = 1.4 (c 1.00, CH<sub>2</sub>Cl<sub>2</sub>); m.p. 109.8-110.3 °C;

**The ee was determined by HPLC** (Chiralpak AD-H, EtOH/hexane = 20/80, flow rate 1.0 mL/min, λ = 254 nm, *t*<sub>major</sub> = 6.6 min, *t*<sub>minor</sub> = 8.9min);

**<sup>1</sup>H NMR (400 MHz, CDCl<sub>3</sub>)** δ 9.06 (s, 1H), 7.86 (dd, *J* = 17.0, 8.2 Hz, 3H), 7.64 – 7.54 (m, 4H), 7.51 (d, *J* = 7.2 Hz, 2H), 7.43 (d, *J* = 7.9 Hz, 1H), 7.35 – 7.23 (m, 3H), 7.17 – 7.11 (m, 1H), 7.11 – 7.05 (m, 3H), 7.05 – 7.01 (m, 1H), 5.13 (d, *J* = 9.6 Hz, 1H).

**<sup>13</sup>C NMR (101 MHz, CDCl<sub>3</sub>)** δ 136.5 (d, *J* = 96.0 Hz), 136.5 (d, *J* = 95.2 Hz), 135.8, 135.4 (d, *J* = 5.2 Hz), 133.7 (qd, *J* = 32.8, 2.9 Hz, 2C), 131.8 (d, *J* = 6.9 Hz), 131.7 (d, *J* = 6.7 Hz), 129.8 (d, *J* = 5.8 Hz), 128.5 (d, *J* = 1.8 Hz), 127.4 (d, *J* = 2.5 Hz), 127.0 (d, *J* = 9.9 Hz), 125.6 (dq, *J* = 11.3, 3.7 Hz), 125.2 (dq, *J* = 11.6, 3.6 Hz), 125.0 (d, *J* = 5.9 Hz), 123.6 (q, *J* = 273.7 Hz), 123.5 (q, *J* = 273.7 Hz), 122.5, 119.9, 117.8, 111.7, 110.2 (d, *J* = 5.2 Hz), 43.7 (d, *J* = 68.0 Hz).

**<sup>31</sup>P NMR (162 MHz, CDCl<sub>3</sub>)** δ 31.22.

**<sup>19</sup>F NMR (376 MHz, CDCl<sub>3</sub>)** δ -63.20, -63.31.

**HRMS (ESI-TOF)** calcd. for C<sub>29</sub>H<sub>21</sub>F<sub>6</sub>NO<sub>2</sub>P [M + H]<sup>+</sup> 544.1259; found: 544.1262.

**(S)-bis(4-fluorophenyl)((2-methyl-1H-indol-3-yl)(naphthalen-2-yl)methyl)phosphine oxide (3c')**

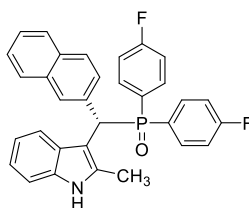

It was purified by flash chromatography (petroleum ether/EtOAc = 2:1) to afford white solid (41.3 mg, 81% yield, 87% ee);  $[\alpha]_{\text{D}}^{20} = -57.6$  (c 1.00, CH<sub>2</sub>Cl<sub>2</sub>); m.p. 135.2-135.6°C;

The ee was determined by HPLC (Chiralpak AD-H, *i*-PrOH/hexane = 30/70, flow rate 1.0 mL/min,  $\lambda = 254$  nm,  $t_{\text{minor}} = 13.3$  min,  $t_{\text{major}} = 18.2$  min);

<sup>1</sup>H NMR (400 MHz, DMSO-*d*<sub>6</sub>)  $\delta$  10.85 (s, 1H), 8.30 (d,  $J = 6.3$  Hz, 1H), 8.11 (d,  $J = 9.0$  Hz, 3H), 7.87 – 7.78 (m, 2H), 7.76 – 7.66 (m, 4H), 7.42 – 7.34 (m, 2H), 7.30 – 7.22 (m, 2H), 7.22 – 7.10 (m, 3H), 6.97 – 6.86 (m, 2H), 5.70 (d,  $J = 11.6$  Hz, 1H), 2.47 (s, 3H).

<sup>13</sup>C NMR (101 MHz, DMSO-*d*<sub>6</sub>)  $\delta$  164.1 (d,  $J_{\text{C-F}} = 250.2$  Hz), 164.0 (d,  $J_{\text{C-F}} = 250.3$  Hz), 135.7 (d,  $J = 87.3$  Hz), 135.6 (d,  $J = 89.0$  Hz), 134.1 (d,  $J = 9.4$  Hz), 134.0, 133.4 (d,  $J = 9.3$  Hz), 133.3, 132.7, 131.6, 130.3, 129.4 (dd,  $J_{\text{C-P}} = 7.4$ ,  $J_{\text{C-F}} = 2.8$  Hz), 128.4 (d,  $J = 6.3$  Hz), 128.0 (dd,  $J_{\text{C-P}} = 7.3$ ,  $J_{\text{C-F}} = 3.4$  Hz), 127.8, 127.6, 127.4, 126.2, 125.8, 120.5, 120.2, 118.4 (d,  $J = 3.0$  Hz), 115.8 (dd,  $J_{\text{C-P}} = 12.2$  Hz,  $J_{\text{C-F}} = 21.5$ ), 115.6 (dd,  $J_{\text{C-P}} = 12.2$  Hz,  $J_{\text{C-F}} = 21.5$ ), 110.3, 106.3 (d,  $J = 4.4$  Hz), 43.6 (d,  $J = 73.9$  Hz), 12.2.

<sup>31</sup>P NMR (162 MHz, DMSO-*d*<sub>6</sub>)  $\delta$  29.64.

<sup>19</sup>F NMR (376 MHz, DMSO-*d*<sub>6</sub>)  $\delta$  -108.25, -108.29.

HRMS (ESI-TOF) calcd. for C<sub>32</sub>H<sub>25</sub>F<sub>2</sub>NOP [M + H]<sup>+</sup> 508.1636 found: 508.1640.

(S)-((2-methyl-1H-indol-3-yl)(naphthalen-2-yl)methyl)diphenylphosphine oxide (3d')

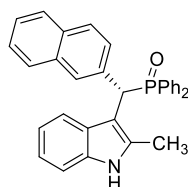

It was purified by flash chromatography (petroleum ether/EtOAc = 2:1) to afford yellow solid (21.2 mg, 45% yield; 91% ee);  $[\alpha]_{\text{D}}^{20} = -91.5$  (c 1.00, THF); m.p. 149.4-150.2 °C;

The ee was determined by HPLC (Chiralpak AD-H, *i*-PrOH/hexane = 25/75, flow rate 1.0 mL/min,  $\lambda = 254$  nm,  $t_{\text{major}} = 16.3$  min,  $t_{\text{minor}} = 23.1$  min);

<sup>1</sup>H NMR (300 MHz, DMSO-*d*<sub>6</sub>)  $\delta$  10.76 (s, 1H), 8.39 – 8.25 (m, 1H), 8.11 (s, 1H), 8.06 – 7.95 (m, 2H), 7.81 – 7.70 (m, 3H), 7.70 – 7.64 (m, 3H), 7.43 – 7.36 (m, 5H), 7.36 – 7.28 (m, 3H), 7.15 – 7.05 (m, 1H), 6.95 – 6.81 (m, 2H), 5.66 (d,  $J = 11.7$  Hz, 1H), 2.44 (s, 3H).

<sup>13</sup>C NMR (101 MHz, DMSO-*d*<sub>6</sub>)  $\delta$  136.3 (d,  $J = 2.2$  Hz), 135.0, 133.9 (d,  $J = 93.1$  Hz), 133.9 (d,  $J = 8.8$  Hz), 133.8 (d,  $J = 97.7$  Hz), 132.6, 131.5, 131.3, 131.2, 131.1, 130.5 (d,  $J = 8.6$  Hz), 128.5, 128.4, 128.3, 128.1 (d,  $J = 11.2$  Hz), 127.9 (d,  $J = 7.4$  Hz), 127.8 (d,  $J = 4.1$  Hz), 127.5, 127.4, 126.1, 125.7, 120.6, 120.0, 118.3, 110.1, 106.7 (d,  $J = 4.5$  Hz), 43.3 (d,  $J = 70.3$  Hz), 12.2.

<sup>31</sup>P NMR (162 MHz, DMSO-*d*<sub>6</sub>)  $\delta$  30.11.

HRMS (ESI-TOF) calcd. for C<sub>32</sub>H<sub>27</sub>NOP [M + H]<sup>+</sup> 472.1830; found: 472.1824.

(S)-((2-methyl-1H-indol-3-yl)(naphthalen-2-yl)methyl)di-*p*-tolylphosphine oxide (3e')

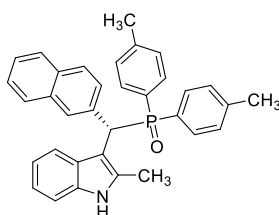

It was purified by flash chromatography (petroleum ether/EtOAc = 2:1) to afford yellow solid (15.9 mg, 32% yield; 56% ee);  $[\alpha]_{\text{D}}^{20} = -27.3$  ( $c$  1.00, THF); m.p. 144.2-144.8 °C;

**The ee was determined by HPLC** (Chiralpak AD-H, EtOH/hexane = 30/70, flow rate 1.0 mL/min,  $\lambda$  = 254 nm,  $t_{\text{major}}$  = 17.0 min,  $t_{\text{minor}}$  = 14.1 min);

**$^1\text{H}$  NMR (400 MHz, DMSO- $d_6$ )**  $\delta$  10.78 (s, 1H), 8.42 – 8.28 (m, 1H), 8.15 (s, 1H), 7.92 – 7.84 (m, 2H), 7.73 (d,  $J$  = 7.9 Hz, 2H), 7.70 – 7.62 (m, 4H), 7.42 – 7.33 (m, 2H), 7.18 (d,  $J$  = 7.2 Hz, 2H), 7.11 (d,  $J$  = 7.1 Hz, 3H), 6.96 – 6.87 (m, 2H), 5.62 (d,  $J$  = 11.5 Hz, 1H), 2.47 (s, 3H), 2.20 (d,  $J$  = 9.5 Hz, 6H).

**$^{13}\text{C}$  NMR (101 MHz, DMSO- $d_6$ )**  $\delta$  142.7 (d,  $J$  = 2.7 Hz), 141.1 (d,  $J$  = 2.3 Hz), 141.0 (d,  $J$  = 2.3 Hz), 136.6 (d,  $J$  = 2.2 Hz), 135.1, 133.8 (d,  $J$  = 8.8 Hz), 132.7, 131.1 (d,  $J$  = 8.9 Hz), 131.0 (d,  $J$  = 94.9 Hz), 130.9 (d,  $J$  = 94.8 Hz), 130.4, 129.5 (d,  $J$  = 13.4 Hz), 129.0 (d,  $J$  = 11.4 Hz), 128.7 (d,  $J$  = 11.5 Hz), 128.5 (d,  $J$  = 6.7 Hz), 127.9, 127.8, 127.5, 127.4, 126.1, 125.6, 120.6, 120.0, 118.3, 110.1, 107.0 (d,  $J$  = 4.3 Hz), 43.4 (d,  $J$  = 70.1 Hz), 21.0, 20.9, 12.3.

**$^{31}\text{P}$  NMR (162 MHz, DMSO- $d_6$ )**  $\delta$  30.42.

**HRMS (ESI-TOF)** calcd. for  $\text{C}_{34}\text{H}_{31}\text{NOP}$   $[\text{M} + \text{H}]^+$  500.2138; found: 500.2143.

**(2-methyl-1H-indol-3-yl)(phenyl)methyl(phenyl)(4-(trifluoromethyl)phenyl)phosphine oxide (3f<sup>+</sup>)**

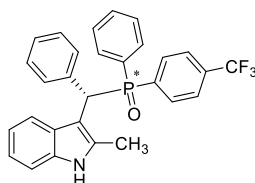

It was purified by flash chromatography (petroleum ether/EtOAc = 3:1) to afford white solid (43.4 mg, 88% yield, 1.25:1 dr; isomer 1: 23.6 mg, 48% yield, 96% ee;  $[\alpha]_{\text{D}}^{20} = 2.78$  ( $c$  1.00,  $\text{CH}_2\text{Cl}_2$ ); m.p. 117.2-117.9 °C; isomer 2: 19.8 mg, 40% yield, 97% ee);  $[\alpha]_{\text{D}}^{20} = -45.2$  ( $c$  1.00,  $\text{CH}_2\text{Cl}_2$ ); m.p. 119.6-120.0 °C;

**The ee was determined by HPLC** (isomer 1 : Chiralpak AD-H, EtOH/hexane = 10/90, flow rate 1.0 mL/min,  $\lambda$  = 254 nm,  $t_{\text{major}}$  = 16.5 min,  $t_{\text{minor}}$  = 22.5 min); (isomer 2: Chiralpak IA, EtOH/hexane = 20/80, flow rate 1.0 mL/min,  $\lambda$  = 254 nm,  $t_{\text{major}}$  = 5.3 min,  $t_{\text{minor}}$  = 5.9 min).

**$^1\text{H}$  NMR (400 MHz, DMSO- $d_6$ ) isomer 1:**  $\delta$  10.79 (s, 1H), 8.31 (d,  $J$  = 5.8 Hz, 1H), 8.24 – 8.15 (m, 2H), 7.84 – 7.73 (m, 4H), 7.57 (d,  $J$  = 7.1 Hz, 2H), 7.41 – 7.28 (m, 3H), 7.18 – 7.08 (m, 3H), 7.08 – 7.01 (m, 1H), 6.96 – 6.86 (m, 2H), 5.58 (d,  $J$  = 11.9 Hz, 1H), 2.45 (s, 3H). **isomer 2:**  $\delta$  10.78 (s, 1H), 8.26 (d,  $J$  = 7.1 Hz, 1H), 8.05 – 7.98 (m, 2H), 7.98 – 7.89 (m, 2H), 7.67 (d,  $J$  = 7.2 Hz, 2H), 7.57 (d,  $J$  = 7.8 Hz, 2H), 7.47 (t,  $J$  = 6.7 Hz, 3H), 7.19 – 7.12 (m, 2H), 7.12 – 7.02 (m, 2H), 6.95 – 6.85 (m, 2H), 5.56 (d,  $J$  = 11.8 Hz, 1H), 2.41 (s, 3H).

**$^{13}\text{C}$  NMR (101 MHz, DMSO- $d_6$ ) isomer 1:**  $\delta$  139.2 (d,  $J$  = 89.9 Hz), 138.2 (d,  $J$  = 2.0 Hz), 135.1, 133.9 (d,  $J$  = 9.3 Hz), 132.8 (d,  $J$  = 98.2 Hz), 132.1 (d,  $J$  = 9.0 Hz), 131.6 (d,  $J$  = 2.0 Hz), 131.1 (d,  $J$  = 2.0 Hz), 130.5 (d,  $J$  = 8.8 Hz), 129.7 (d,  $J$  = 6.8 Hz), 128.3 (d,  $J$  = 11.3 Hz), 128.1, 127.7 (d,  $J$  = 4.1 Hz), 126.4, 125.3 – 124.6 (m), 123.8 (q,  $J$  = 273.7 Hz), 120.6, 120.1, 118.4, 110.2, 106.5 (d,  $J$  = 4.5 Hz), 43.2 (d,  $J$  = 68.4 Hz), 12.2. **isomer 2:**  $\delta$  139.0 (d,  $J$  = 94.1 Hz), 138.1 (d,  $J$  = 2.1 Hz), 135.0, 133.9 (d,  $J$  = 9.2 Hz), 132.9 (d,  $J$  = 93.8 Hz), 131.7 (d,  $J$  = 2.2 Hz), 131.4 (d,  $J$  = 9.1 Hz), 131.2 (d,  $J$  = 8.9 Hz), 131.0 (d,  $J$  = 2.7 Hz), 129.7 (d,  $J$  = 7.0 Hz), 128.6 (d,  $J$  = 11.2 Hz), 128.1,

127.6 (d,  $J = 3.7$  Hz), 126.4, 125.0 – 124.8 (m), 123.7 (q,  $J = 273.7$  Hz), 120.6, 120.1, 118.4, 110.2, 106.4 (d,  $J = 4.7$  Hz), 43.1 (d,  $J = 70.6$  Hz), 12.1.

$^{31}\text{P}$  NMR (162 MHz,  $\text{CDCl}_3$ ) isomer 1  $\delta$  30.82; isomer 2  $\delta$  31.03.

$^{19}\text{F}$  NMR (376 MHz,  $\text{CDCl}_3$ ) isomer 1  $\delta$  -63.05; isomer 2  $\delta$  -63.17.

HRMS (ESI-TOF) calcd. for  $\text{C}_{29}\text{H}_{23}\text{F}_3\text{NOP}$   $[\text{M} + \text{H}]^+$  490.1542; found: 490.1543.

### 3. Scale-up experiment

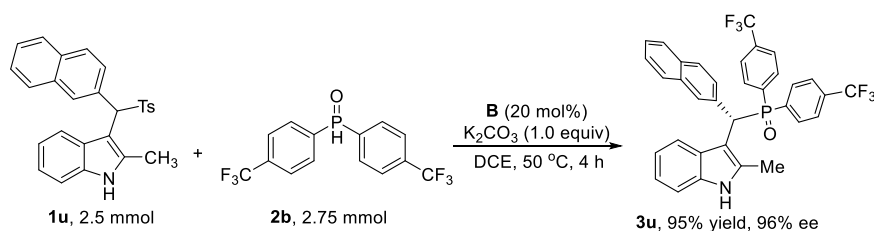

In an ordinary vial equipped with a magnetic stirring bar, the bis(4-(trifluoromethyl)phenyl)-phosphine oxide **2b** (2.75 mmol, 930 mg) were added to a solution of arylsulfonyl indoles **1a** (2.5 mmol, 1.06 g), catalyst **B** (20 mol%) and  $\text{K}_2\text{CO}_3$  (2.5 mmol, 1.0 equiv) in 1,2-dichloroethane (25 mL) at 50 °C. And then, the whole was stirred for 5 h until the completion of the reaction, as indicated by TLC. Finally the reaction mixture was directly purified by flash chromatography on silica gel (PE/EA/DCM=4:1:1) and obtained the products **3u** (1.44 g, 95% yield, 96% ee).

### 4. X-ray crystal data for compound 3s

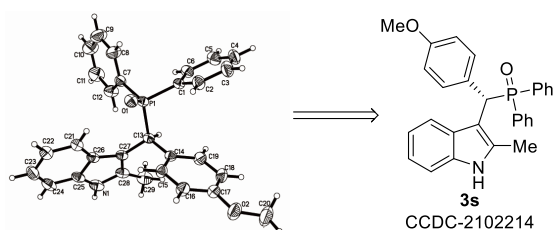

|                                  |                                                 |
|----------------------------------|-------------------------------------------------|
| Identification code              | 202009174                                       |
| Empirical formula                | $\text{C}_{31}\text{H}_{32}\text{NO}_3\text{P}$ |
| Formula weight                   | 497.54                                          |
| Temperature/K                    | 293(2)                                          |
| Crystal system                   | orthorhombic                                    |
| Space group                      | P212121                                         |
| a/Å                              | 10.45953(19)                                    |
| b/Å                              | 13.5092(3)                                      |
| c/Å                              | 19.3396(4)                                      |
| $\alpha/^\circ$                  | 90                                              |
| $\beta/^\circ$                   | 90                                              |
| $\gamma/^\circ$                  | 90                                              |
| Volume/Å <sup>3</sup>            | 2732.69(10)                                     |
| Z                                | 4                                               |
| $\rho_{\text{calc}}/\text{cm}^3$ | 1.209                                           |



|                                                  |                                                                        |
|--------------------------------------------------|------------------------------------------------------------------------|
| $\mu/\text{mm-1}$                                | 1.138                                                                  |
| F(000)                                           | 1056.0                                                                 |
| Crystal size/mm <sup>3</sup>                     | 0.16 × 0.13 × 0.09                                                     |
| Radiation                                        | CuK $\alpha$ ( $\lambda$ = 1.54184)                                    |
| 2 $\Theta$ range for data collection/ $^{\circ}$ | 7.984 to 134.138                                                       |
| Index ranges                                     | -12 $\leq$ h $\leq$ 12, -16 $\leq$ k $\leq$ 15, -22 $\leq$ l $\leq$ 23 |
| Reflections collected                            | 24771                                                                  |
| Independent reflections                          | 4884 [Rint = 0.0406, Rsigma = 0.0269]                                  |
| Data/restraints/parameters                       | 4884/1/333                                                             |
| Goodness-of-fit on F <sup>2</sup>                | 1.032                                                                  |
| Final R indexes [ $I \geq 2\sigma(I)$ ]          | R1 = 0.0391, wR2 = 0.1048                                              |
| Final R indexes [all data]                       | R1 = 0.0420, wR2 = 0.1077                                              |
| Largest diff. peak/hole / e $\text{\AA}^{-3}$    | 0.22/-0.20                                                             |
| Flack parameter                                  | -0.006(10)                                                             |

## 5. Proposed reaction mechanism

In the presence of base, an elimination of *p*-methyl benzenesulfinic acid from sulfonyl indoles **1** leads to the *in situ* generation of indole-derived vinylogous imine intermediates **Int-1**, which is oriented by the double hydrogen bonds of thiourea moiety of the catalyst **B**. Concurrently, the tertiary nitrogen of the quinine moiety in catalyst **B** would provide suitable basicity to enhance the nucleophilicity of the diarylphosphine oxides **2**. Under the stereoselective control via transition state **TS-1**, the phospho-Michael conjugated addition of diarylphosphine oxides **2** to the *Si*-face of intermediates **A** leads to the expected 3-(1-diphenylphosphoryl-arylmethyl)indole products **3** with stereospecific configuration.

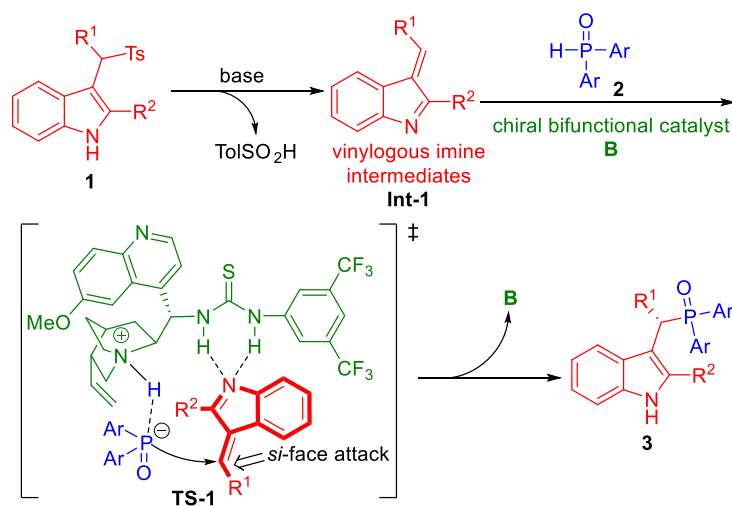

Proposed reaction mechanism

## 5. NMR and HPLC Spectra of compounds of 3

<sup>1</sup>H NMR spectrum of compound 3a

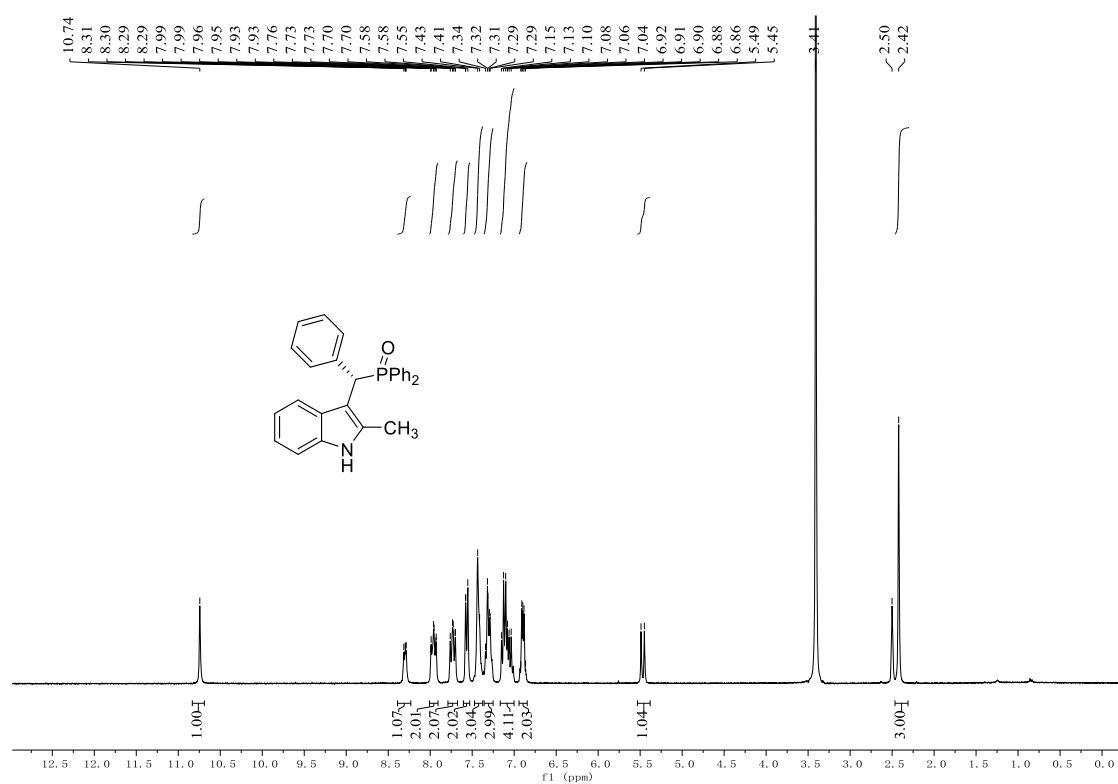

<sup>13</sup>C NMR spectrum of compound 3a

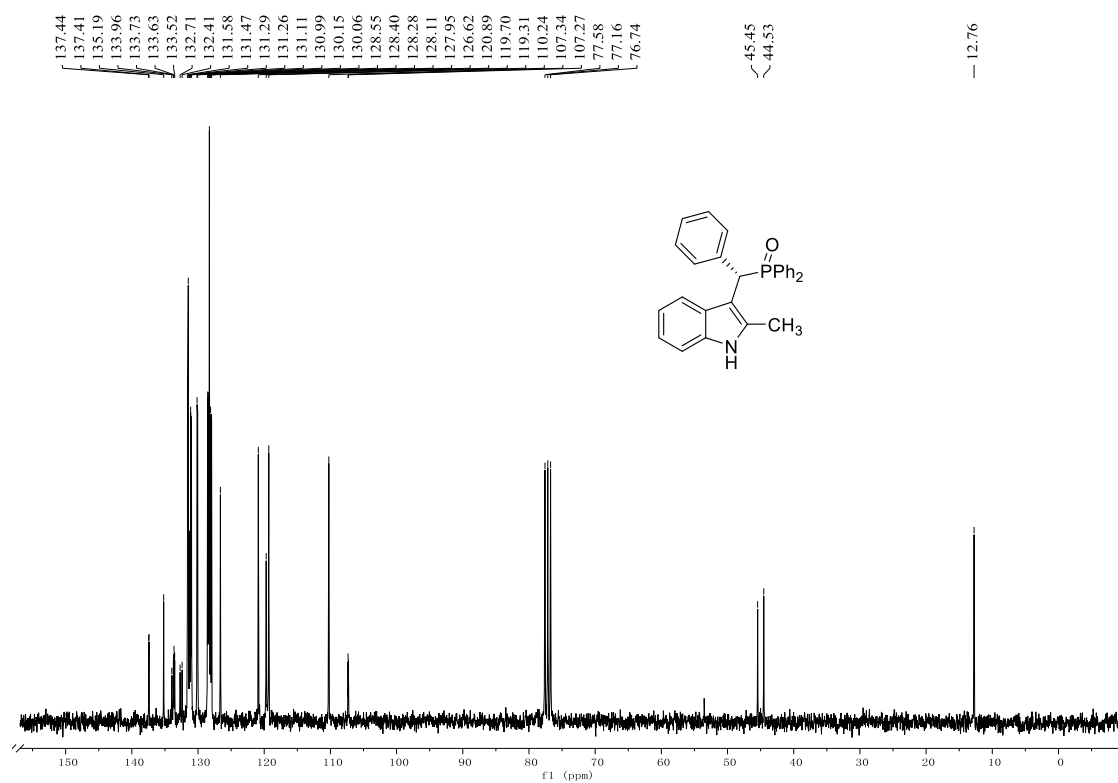

**$^{31}\text{P}$  NMR spectrum of compound 3a**

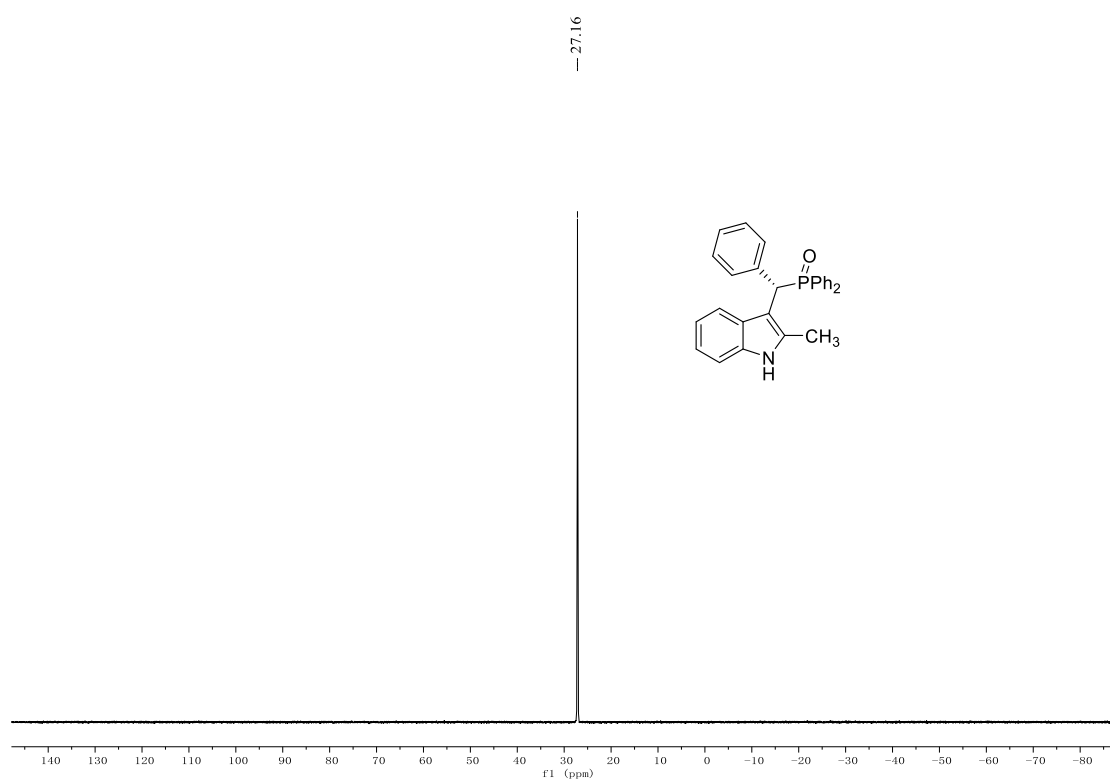

# HPLC spectra of 3a

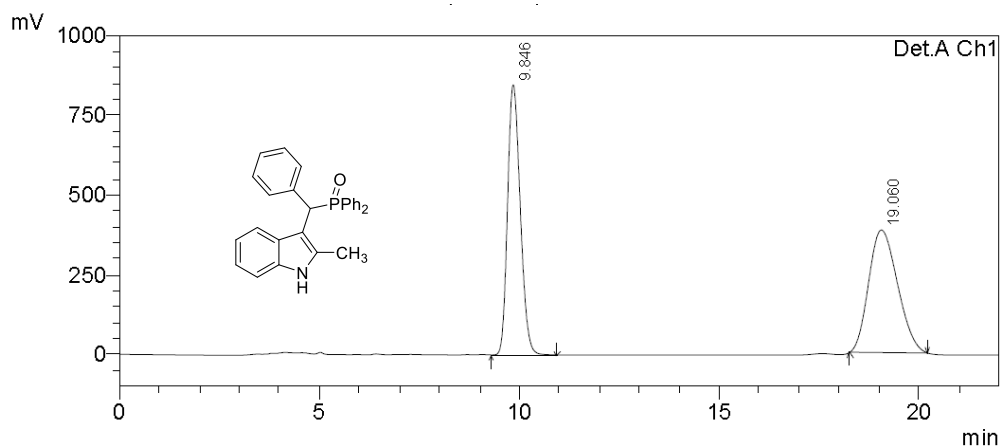

1 Det.A Ch1/254nm

PeakTable

Detector A Ch1 254nm

| Peak# | Ret. Time | Area     | Height | Area %  |
|-------|-----------|----------|--------|---------|
| 1     | 9.846     | 19041230 | 850143 | 49.709  |
| 2     | 19.060    | 19264527 | 384045 | 50.291  |
| Total |           | 38305756 |        | 100.000 |

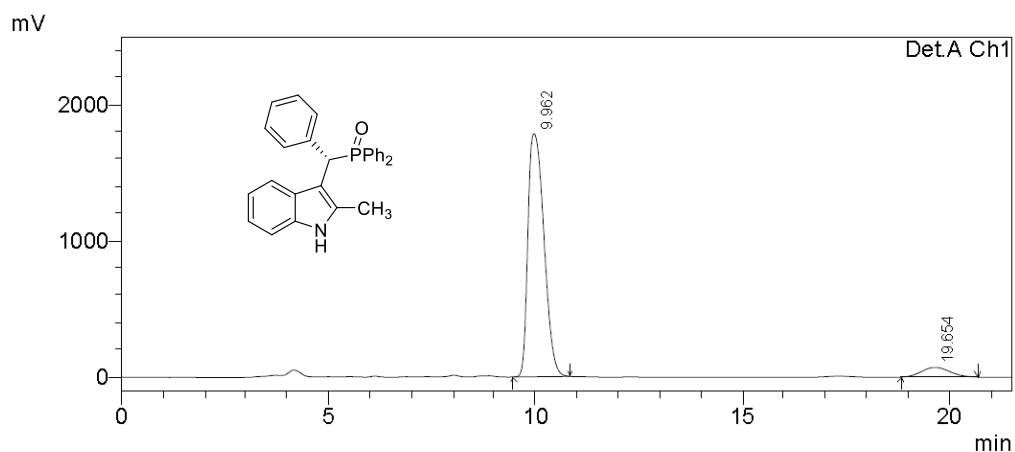

1 Det.A Ch1/254nm

PeakTable

Detector A Ch1 254nm

| Peak# | Ret. Time | Area     | Height  | Area %  |
|-------|-----------|----------|---------|---------|
| 1     | 9.962     | 48032271 | 1782155 | 93.456  |
| 2     | 19.654    | 3363384  | 71124   | 6.544   |
| Total |           | 51395655 |         | 100.000 |

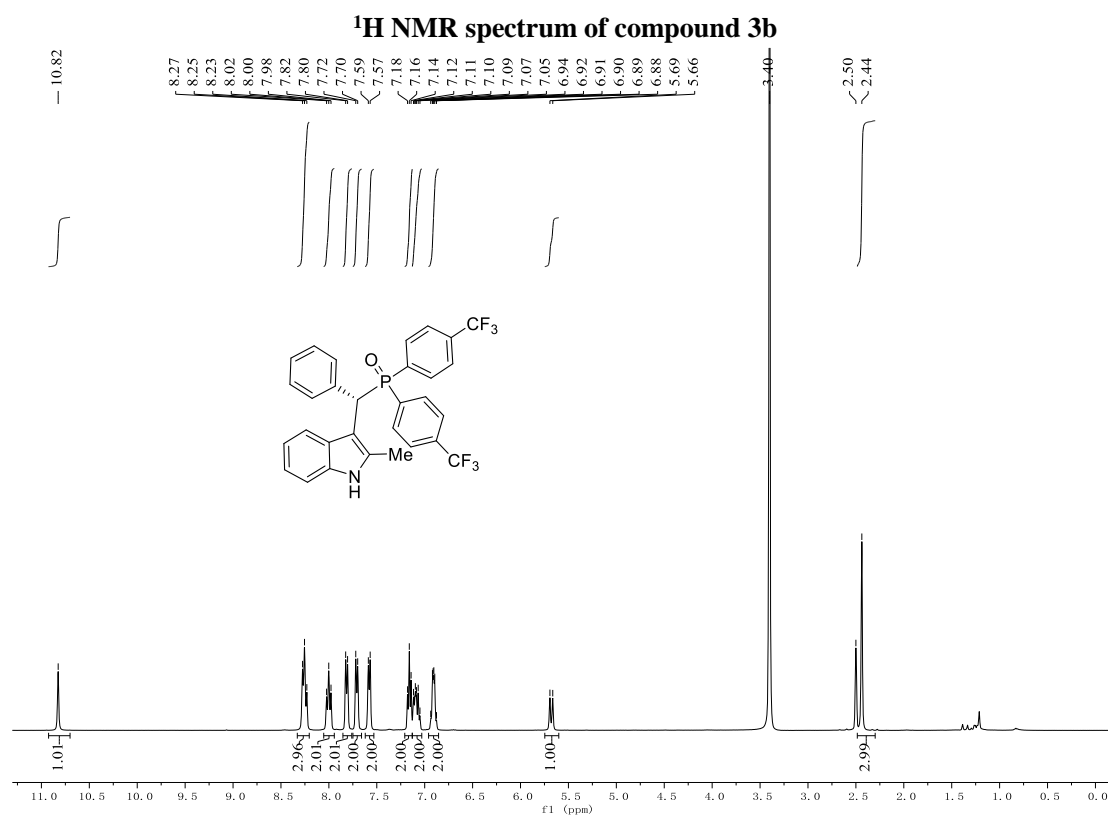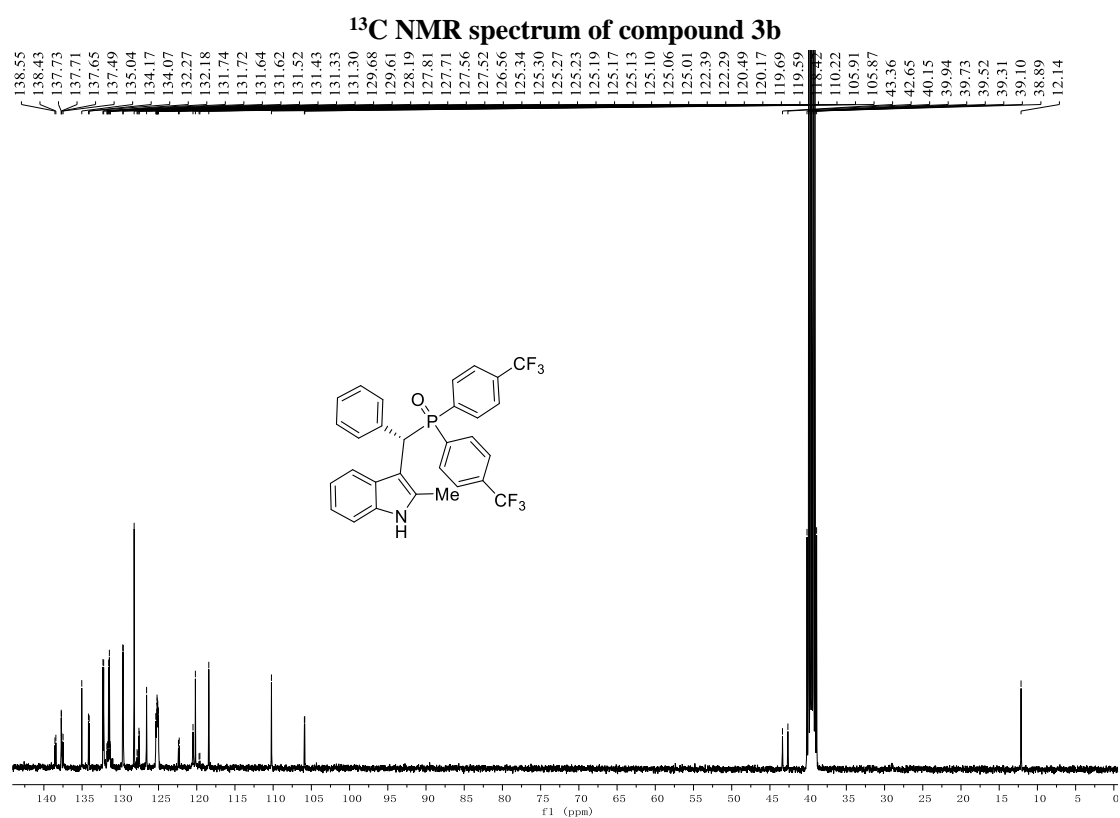

**$^{31}\text{P}$  NMR spectrum of compound 3b**

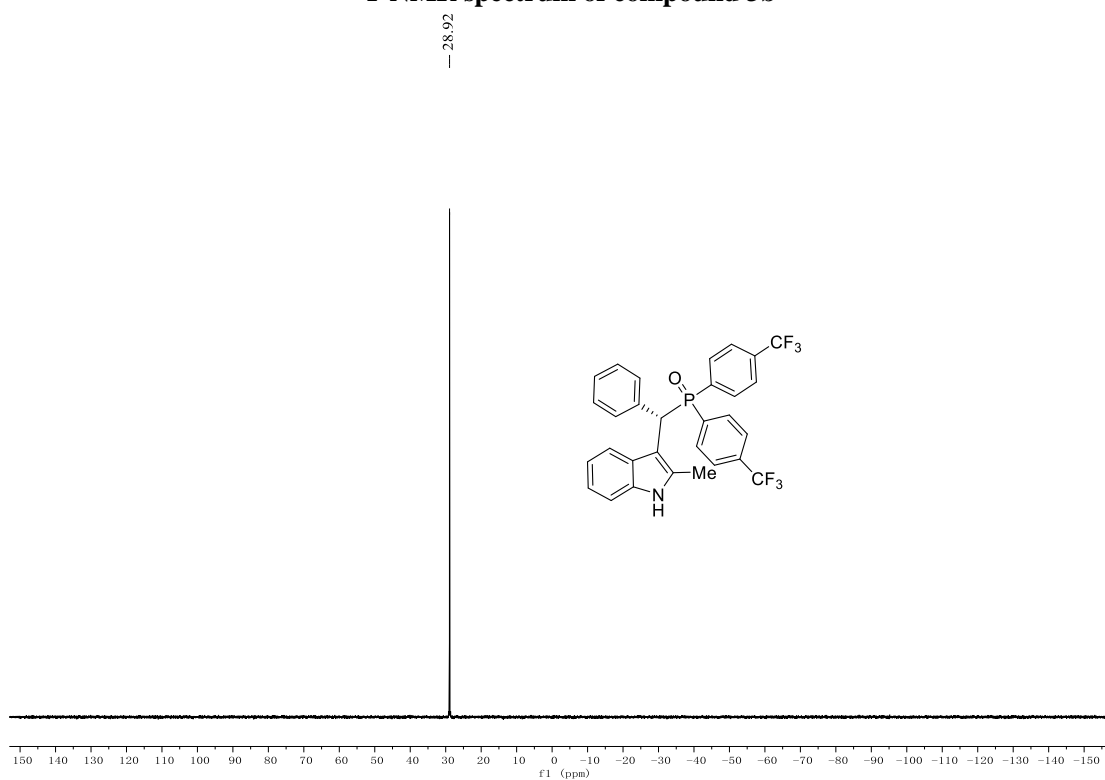

**$^{19}\text{F}$  NMR spectrum of compound 3b**

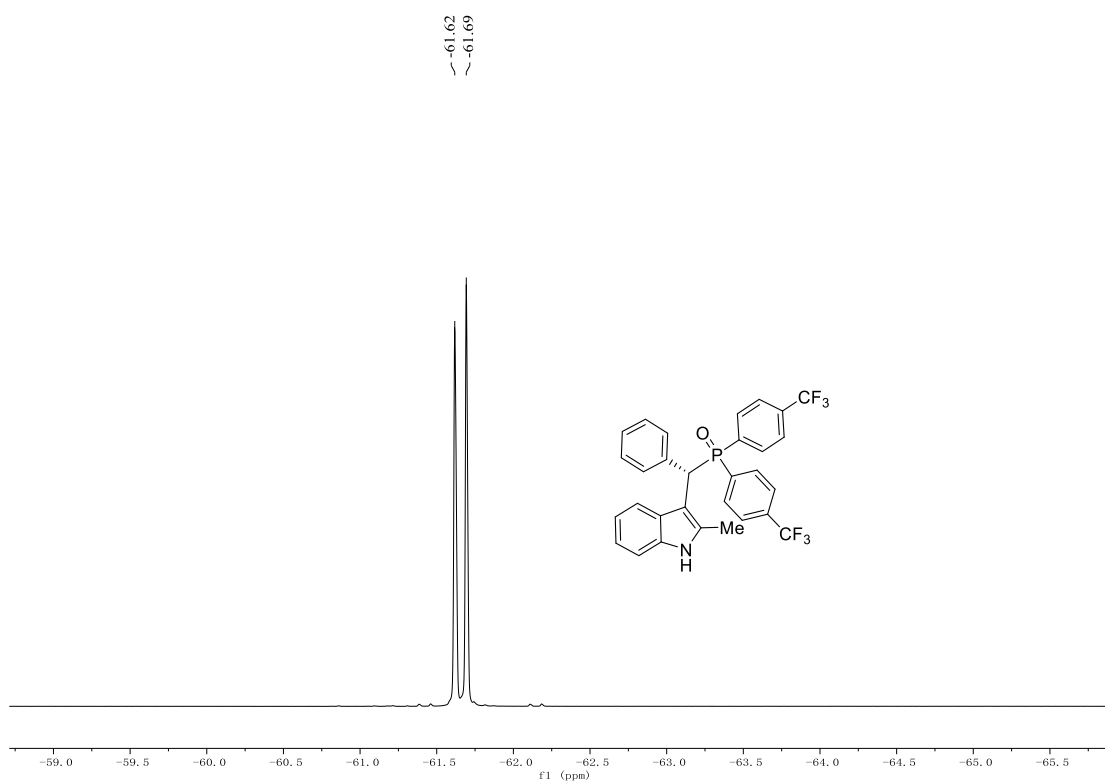

## HPLC spectra of 3b

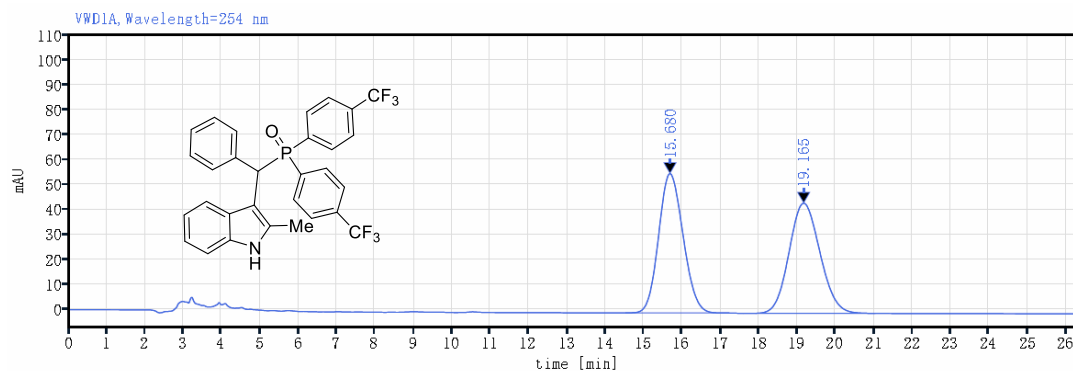

Detector VWD1A, Wavelength=254 nm

| Peak | Ret.Time [min] | Area    | Height | Area%  |
|------|----------------|---------|--------|--------|
|      | 15.680         | 2479.31 | 55.94  | 50.07  |
|      | 19.165         | 2472.60 | 44.21  | 49.93  |
|      |                | 4951.91 |        | 100.00 |

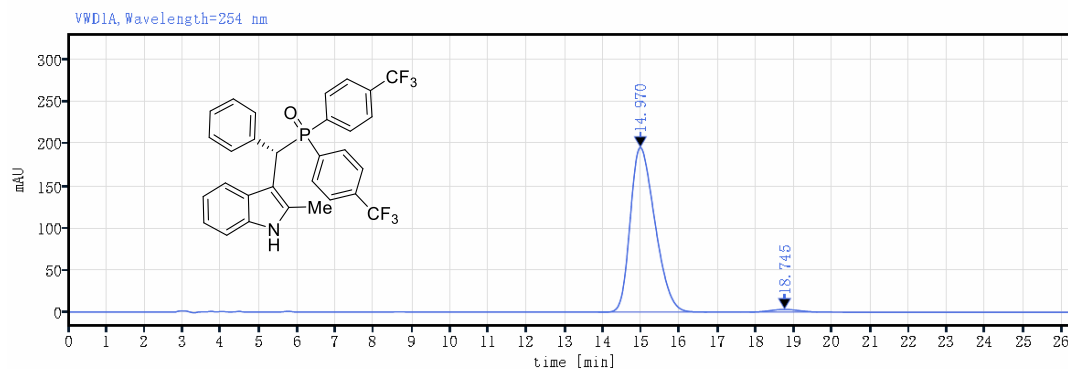

Detector VWD1A, Wavelength=254 nm

| Peak | Ret.Time [min] | Area    | Height | Area%  |
|------|----------------|---------|--------|--------|
|      | 14.970         | 8776.53 | 195.98 | 98.27  |
|      | 18.745         | 154.48  | 3.07   | 1.73   |
|      |                | 8931.00 |        | 100.00 |

**<sup>1</sup>H NMR spectrum of compound of 3c**

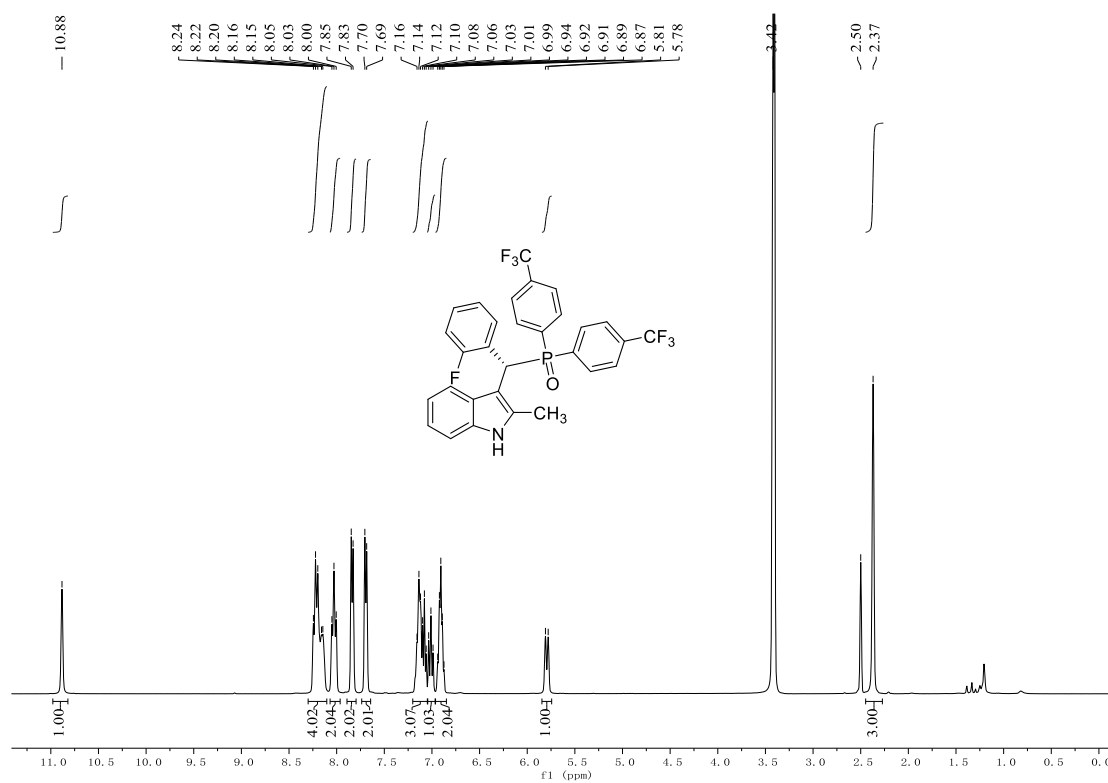

**<sup>13</sup>C NMR spectrum of compound of 3c**

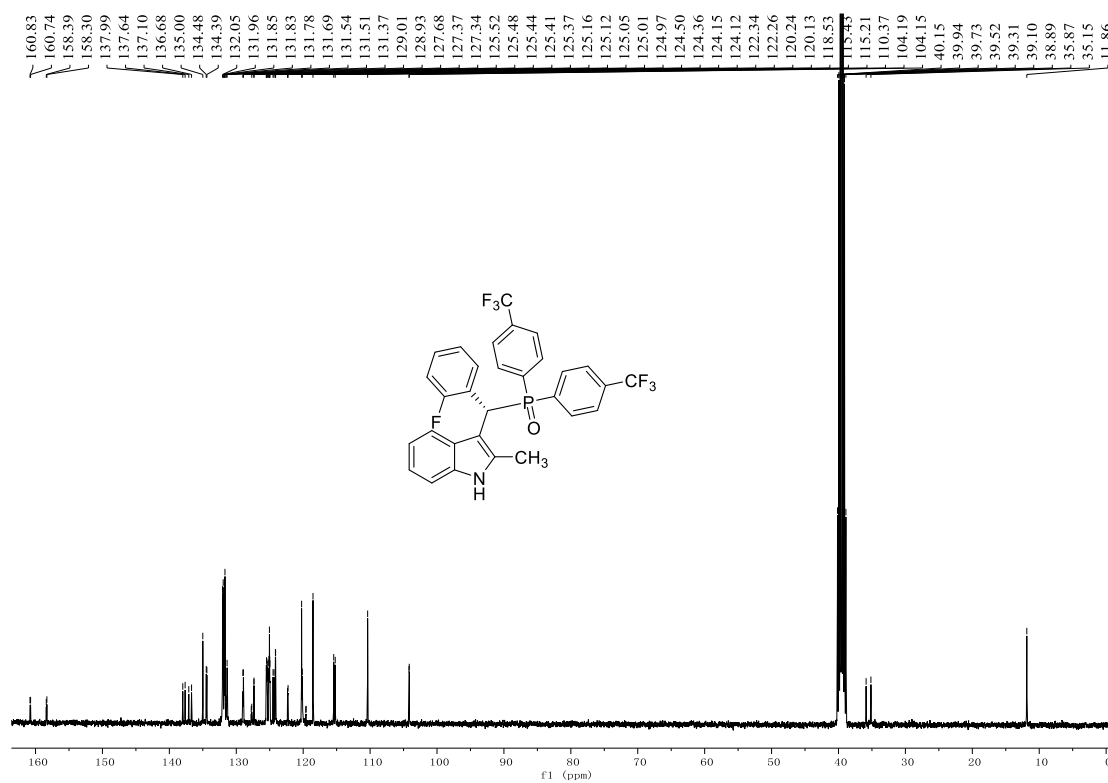



# **<sup>31</sup>P NMR spectrum of compound of 3c**

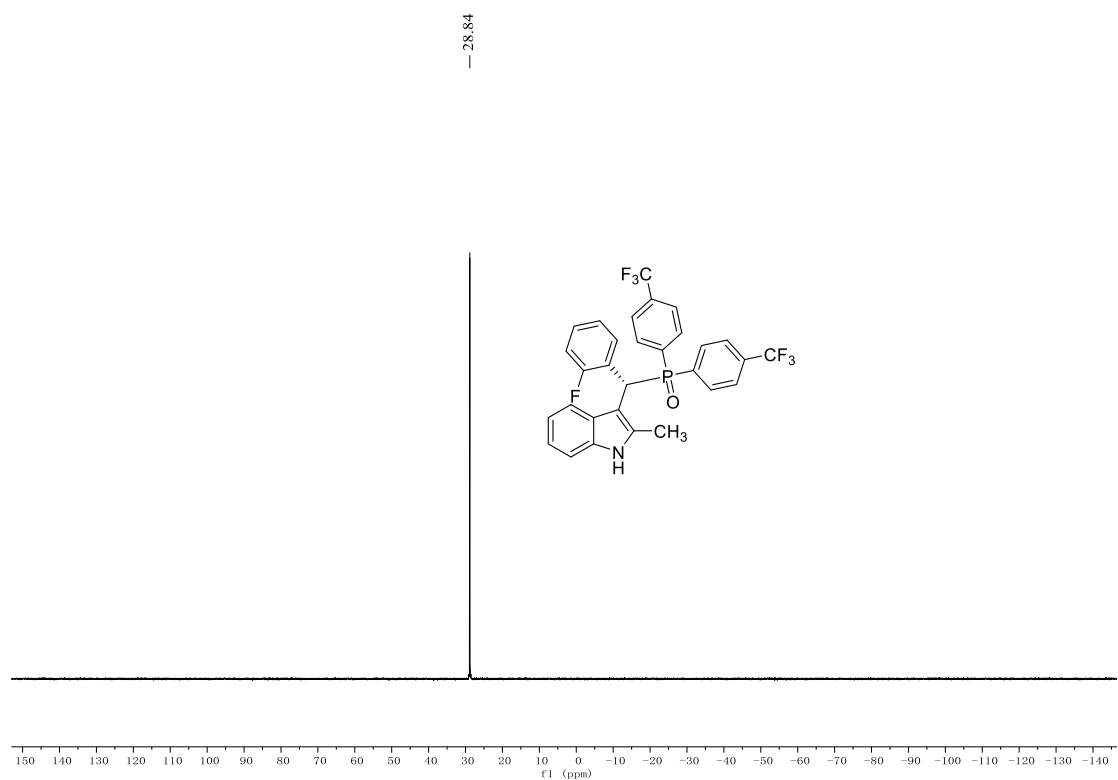

# **<sup>19</sup>F NMR spectrum of compound of 3c**

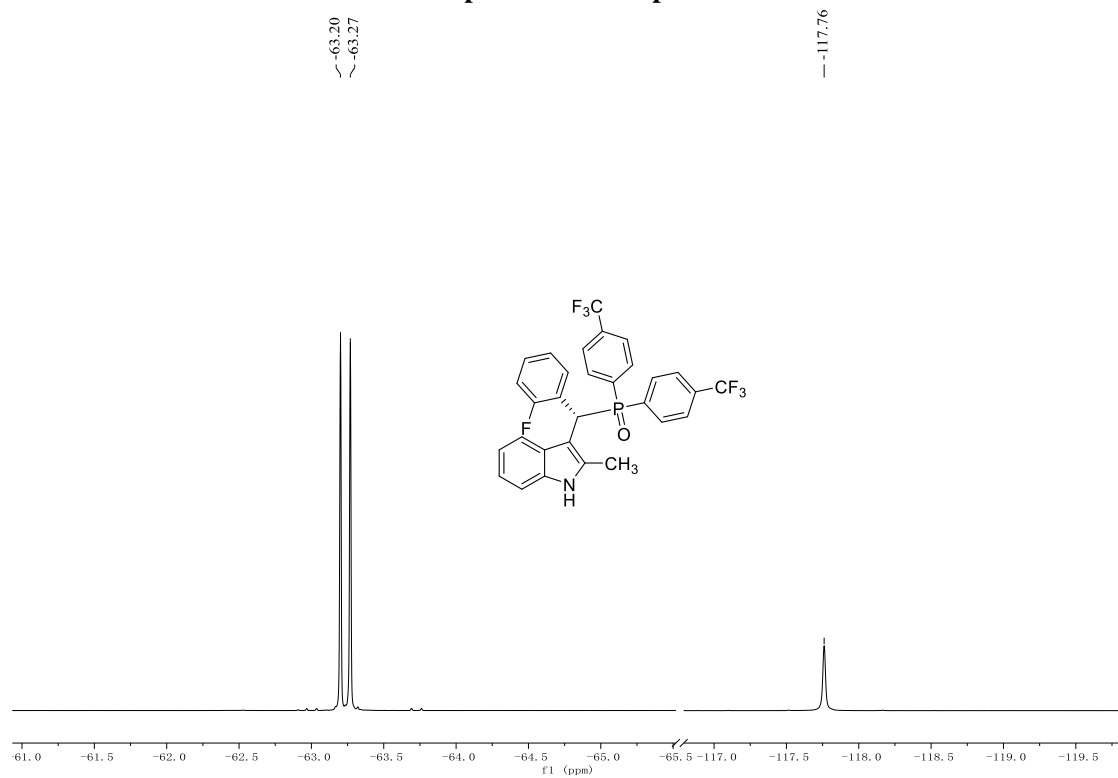

## HPLC spectra of 3c

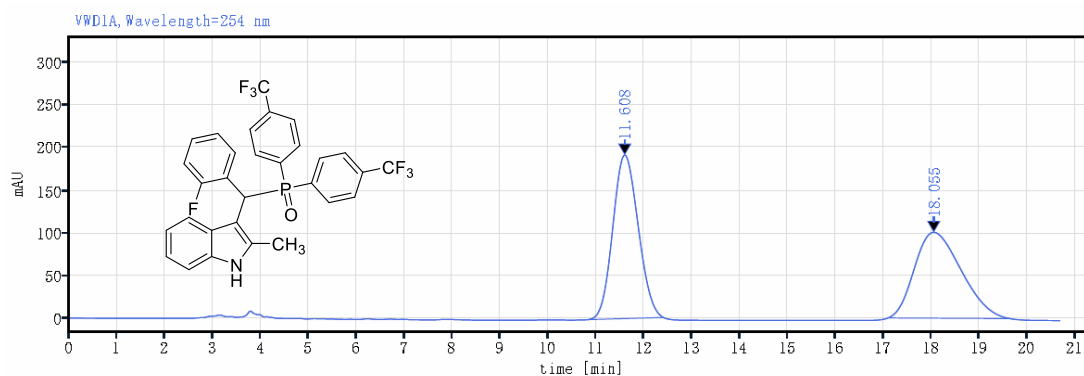

Detector VWD1A, Wavelength=254 nm

| Peak | Ret.Time [min] | Area     | Height | Area%  |
|------|----------------|----------|--------|--------|
|      | 11.608         | 7077.73  | 192.32 | 50.94  |
|      | 18.055         | 6815.55  | 100.96 | 49.06  |
|      |                | 13893.28 |        | 100.00 |

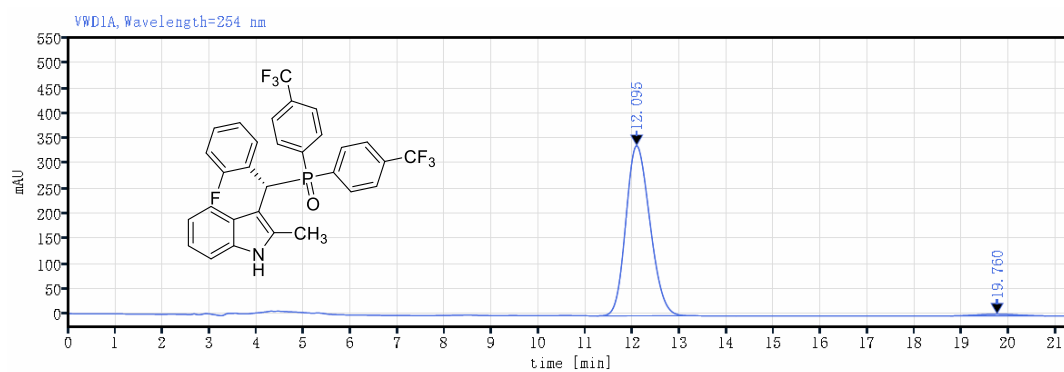

Detector VWD1A, Wavelength=254 nm

| Peak | Ret.Time [min] | Area     | Height | Area%  |
|------|----------------|----------|--------|--------|
|      | 12.095         | 12038.19 | 338.44 | 98.41  |
|      | 19.760         | 194.44   | 3.24   | 1.59   |
|      |                | 12232.63 |        | 100.00 |

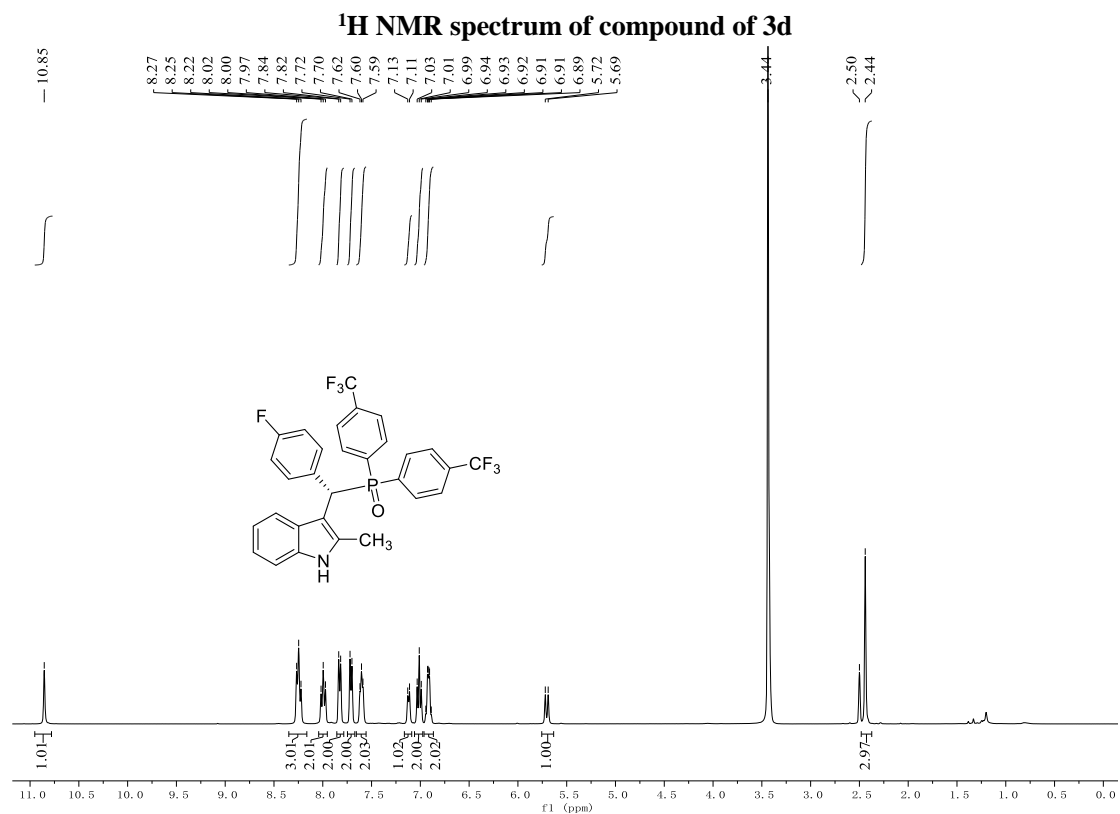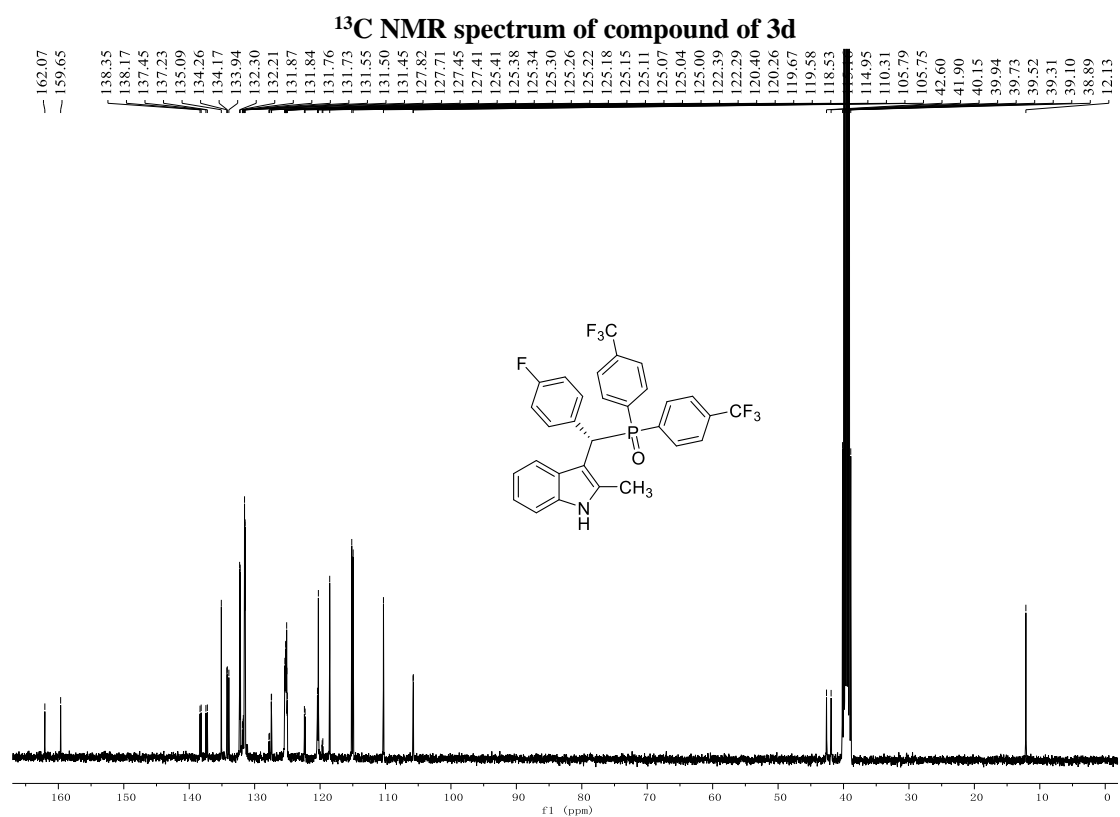

### <sup>31</sup>P NMR spectrum of compound of 3d

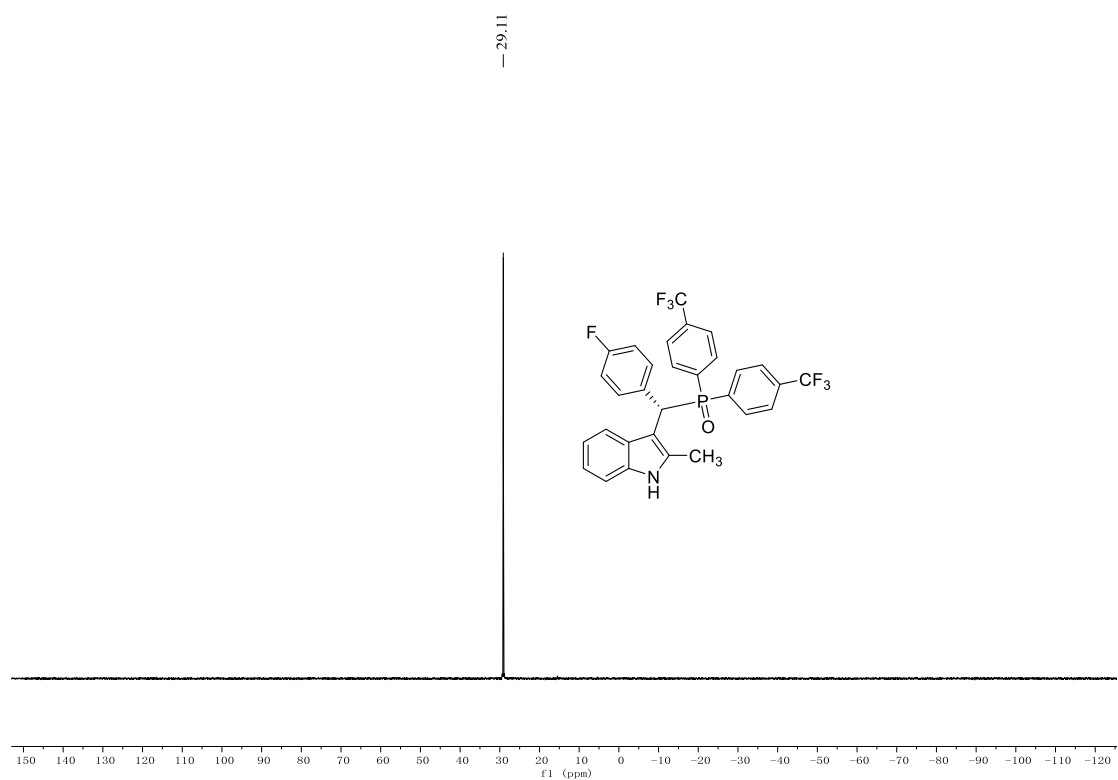

### <sup>19</sup>F NMR spectrum of compound of 3d

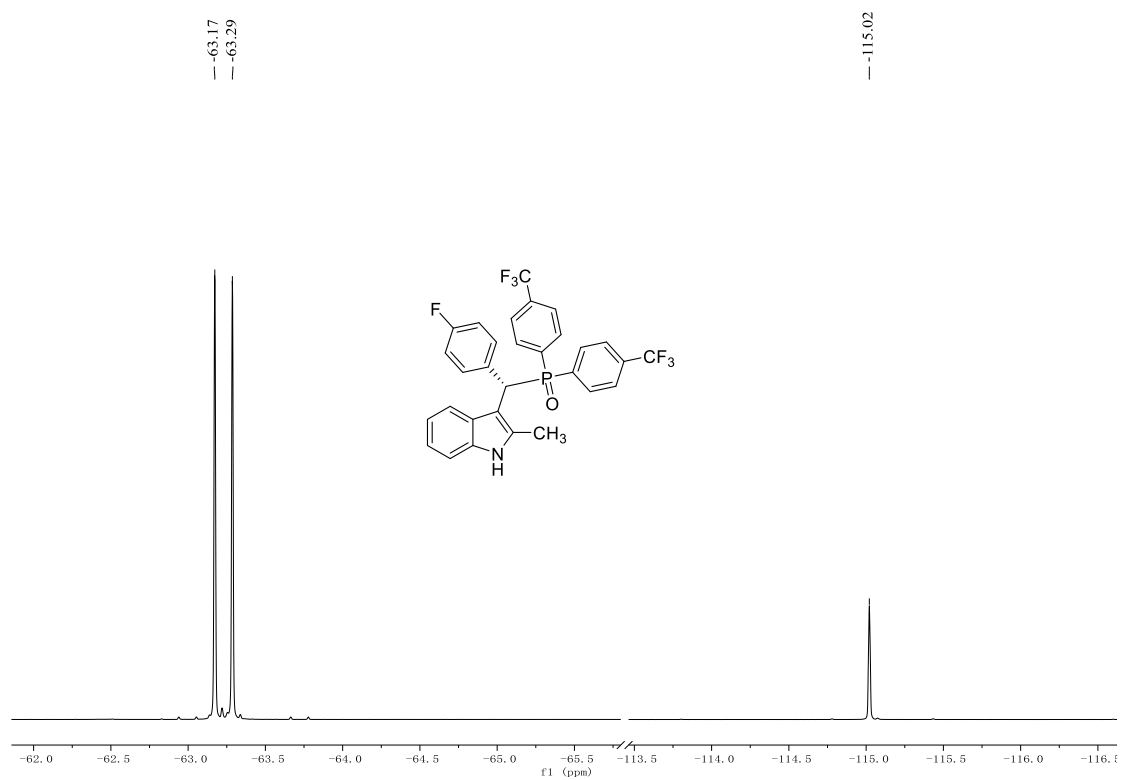

## HPLC spectra of 3d

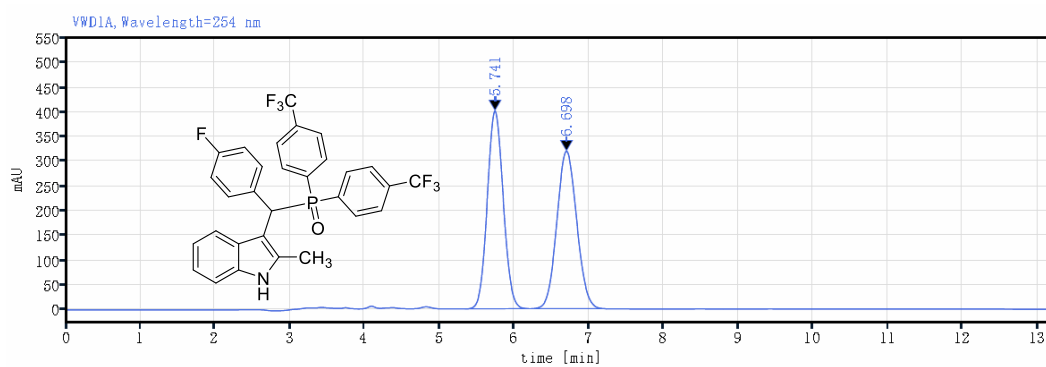

Detector VWD1A, Wavelength=254 nm

| Peak | Ret. Time [min] | Area     | Height | Area%  |
|------|-----------------|----------|--------|--------|
|      | 5.741           | 5943.69  | 400.56 | 50.26  |
|      | 6.698           | 5883.29  | 318.48 | 49.74  |
|      |                 | 11826.99 |        | 100.00 |

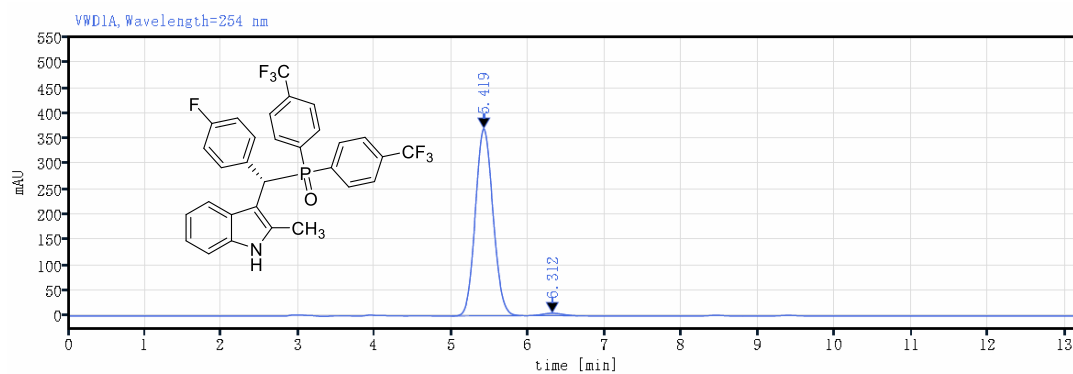

Detector VWD1A, Wavelength=254 nm

| Peak | Ret. Time [min] | Area    | Height | Area%  |
|------|-----------------|---------|--------|--------|
|      | 5.419           | 5908.84 | 369.02 | 98.64  |
|      | 6.312           | 81.32   | 4.63   | 1.36   |
|      |                 | 5990.16 |        | 100.00 |

<sup>1</sup>H NMR spectrum of compound of 3e

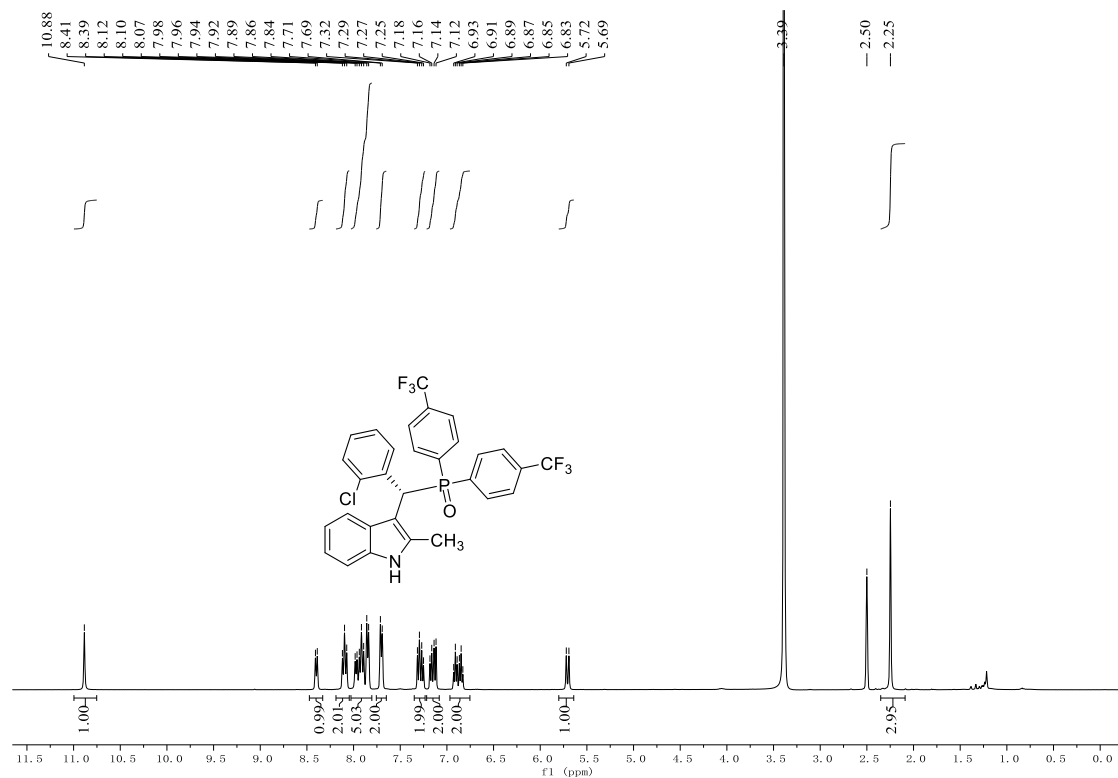

<sup>13</sup>C NMR spectrum of compound of 3e

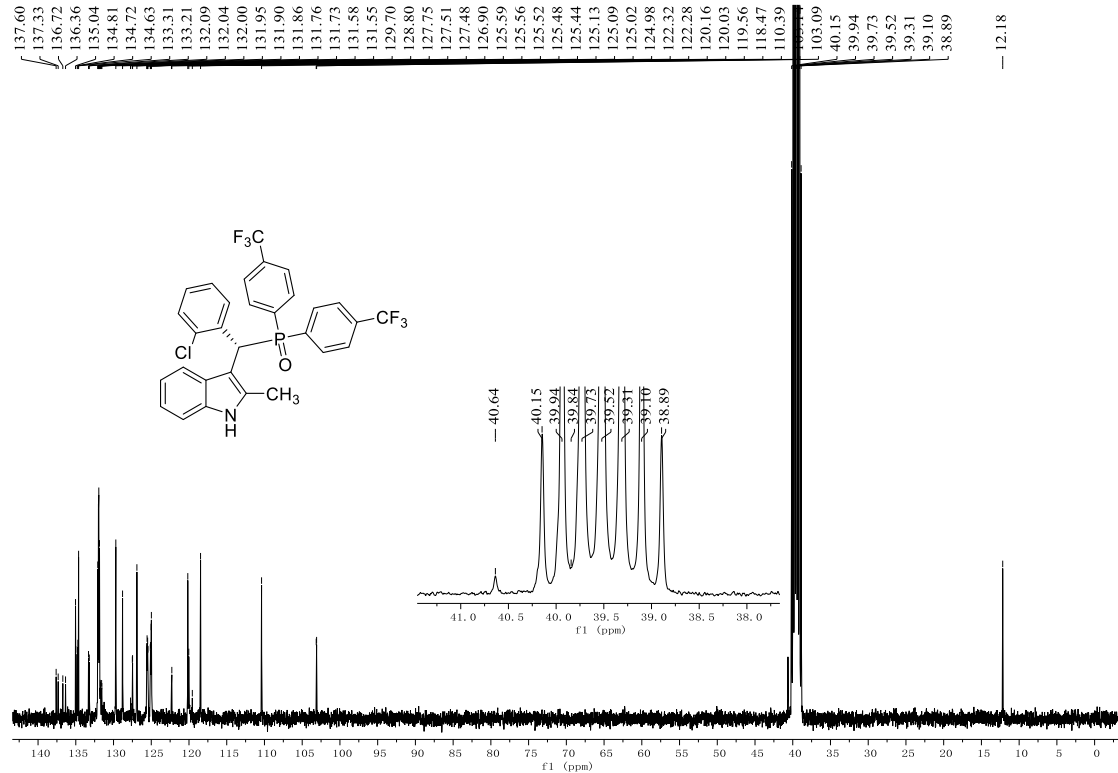

# **<sup>31</sup>P NMR spectrum of compound of 3e**

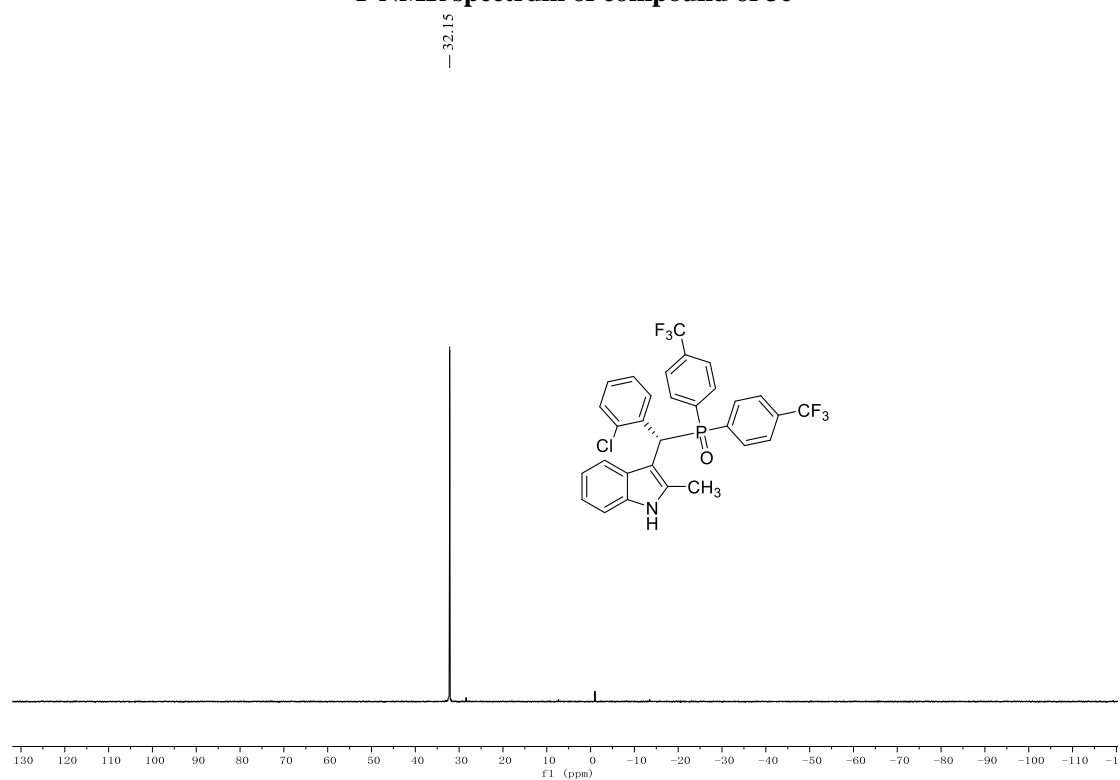

# **<sup>19</sup>F NMR spectrum of compound of 3e**

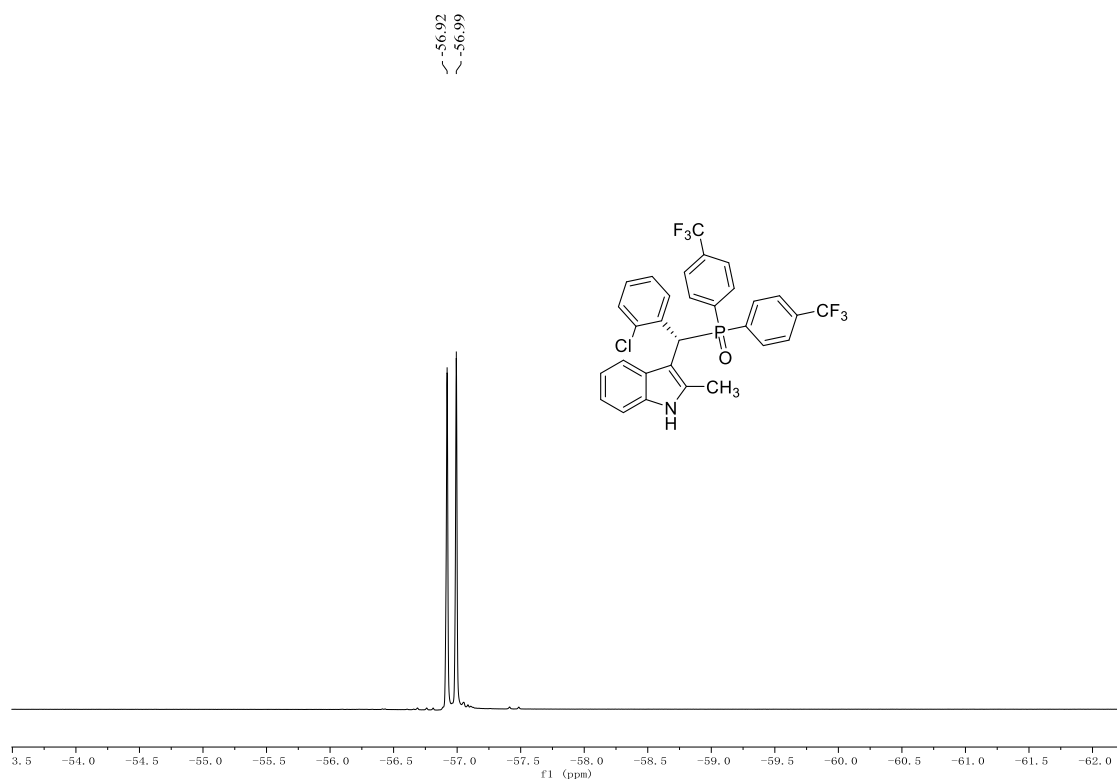

## HPLC spectra of 3e

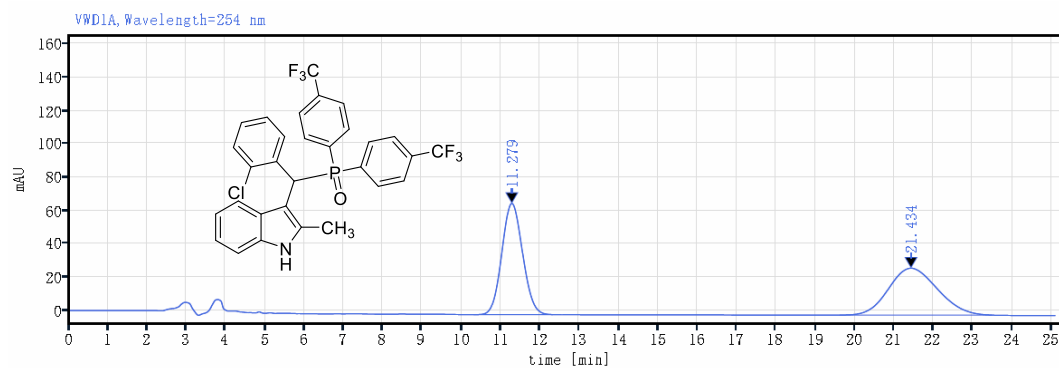

Detector VWD1A, Wavelength=254 nm

| Peak | Ret. Time [min] | Area    | Height | Area%  |
|------|-----------------|---------|--------|--------|
|      | 11.279          | 2452.44 | 66.90  | 50.21  |
|      | 21.434          | 2431.53 | 28.23  | 49.79  |
|      |                 | 4883.97 |        | 100.00 |

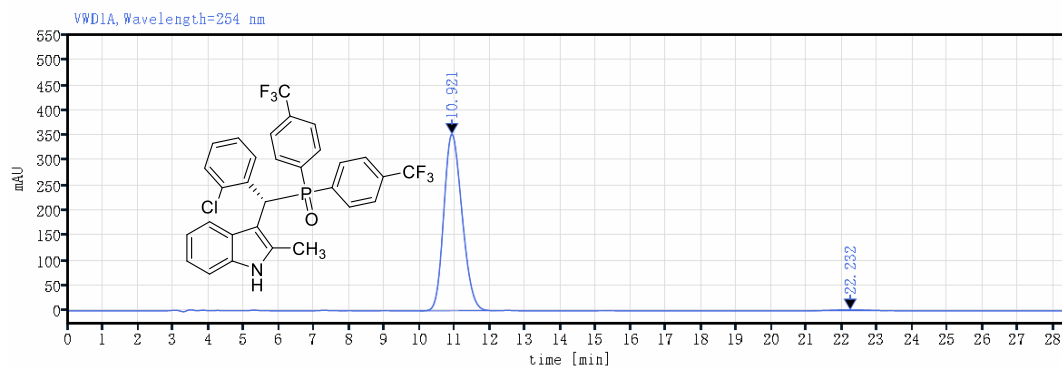

Detector VWD1A, Wavelength=254 nm

| Peak | Ret. Time [min] | Area     | Height | Area%  |
|------|-----------------|----------|--------|--------|
|      | 10.921          | 12689.30 | 352.10 | 99.08  |
|      | 22.232          | 117.61   | 1.63   | 0.92   |
|      |                 | 12806.92 |        | 100.00 |



**<sup>1</sup>H NMR spectrum of compound of 3f**

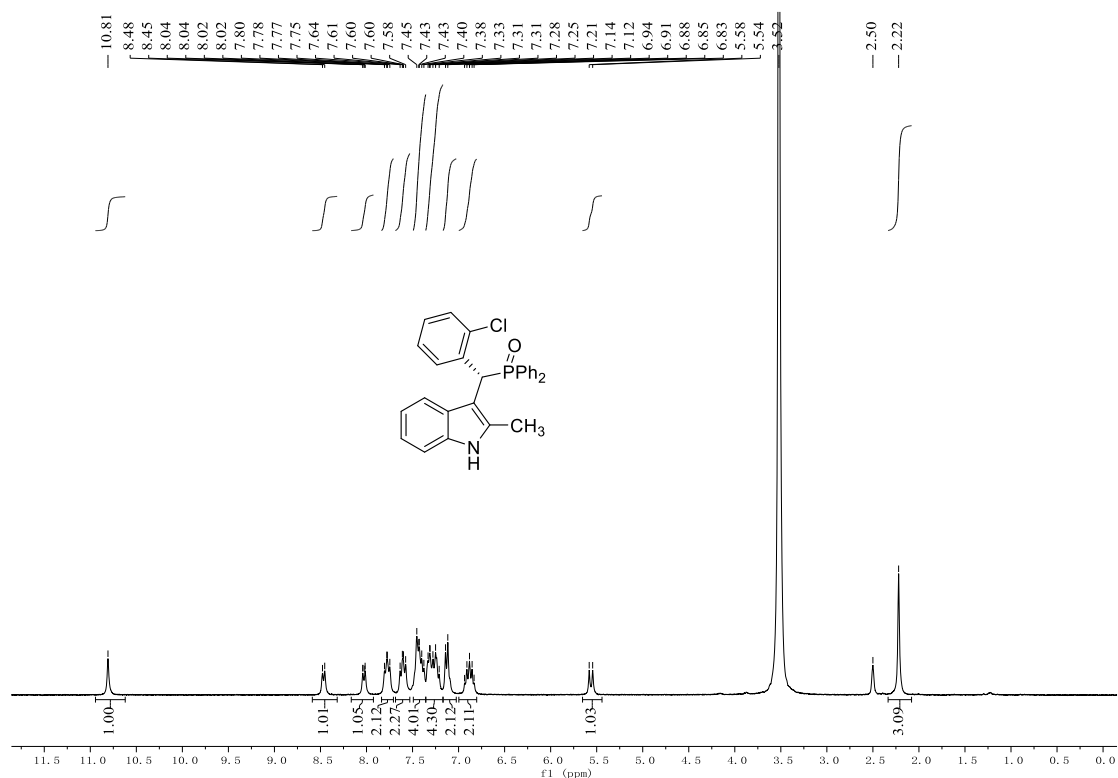

**<sup>13</sup>C NMR spectrum of compound of 3f**

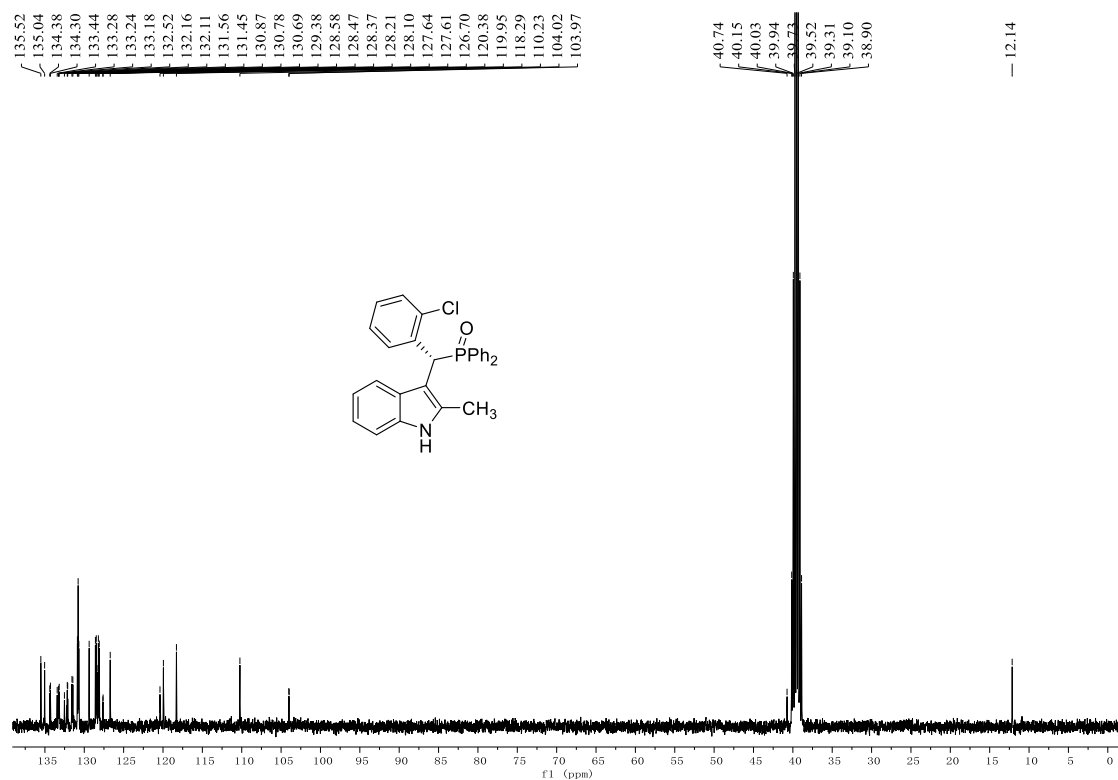

**$^{31}\text{P}$  NMR spectrum of compound of 3f**

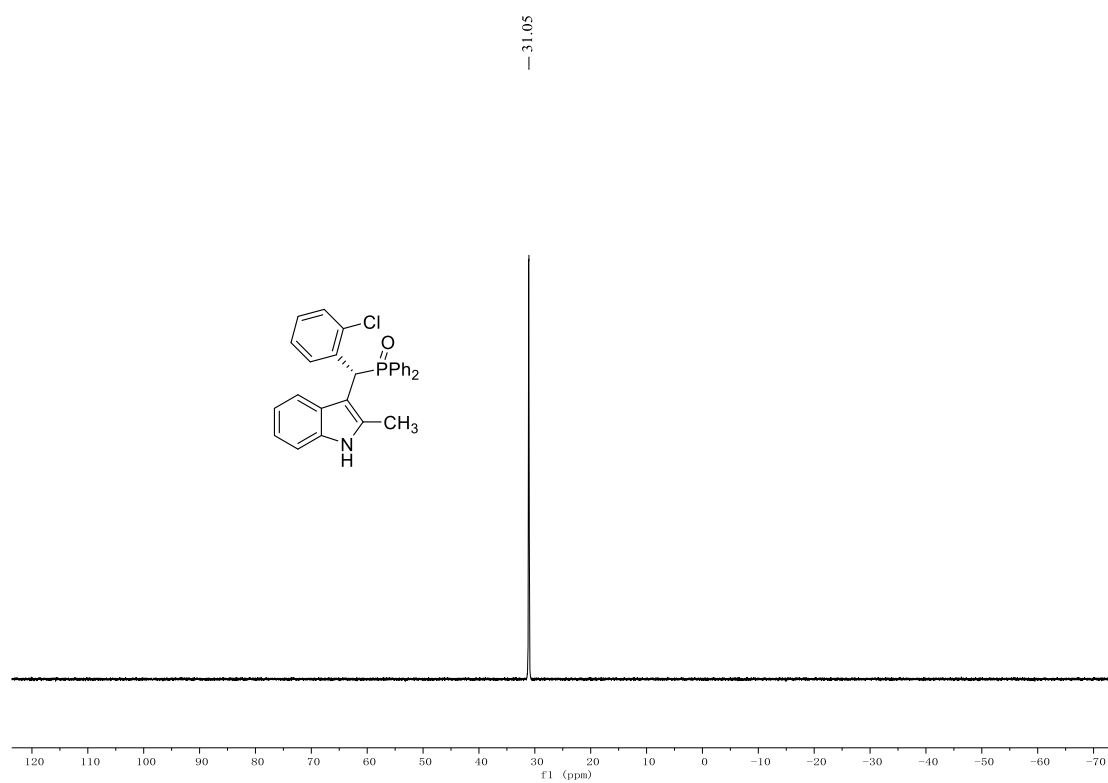

# HPLC spectra of 3f

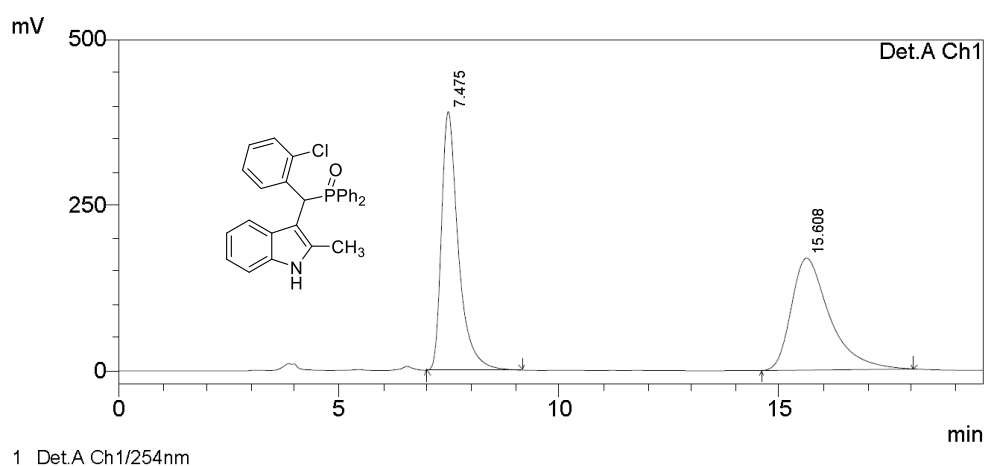

PeakTable

Detector A Ch1 254nm

| Peak# | Ret. Time | Area     | Height | Area %  |
|-------|-----------|----------|--------|---------|
| 1     | 7.475     | 10358144 | 389612 | 50.371  |
| 2     | 15.608    | 10205365 | 168527 | 49.629  |
| Total |           | 20563508 |        | 100.000 |

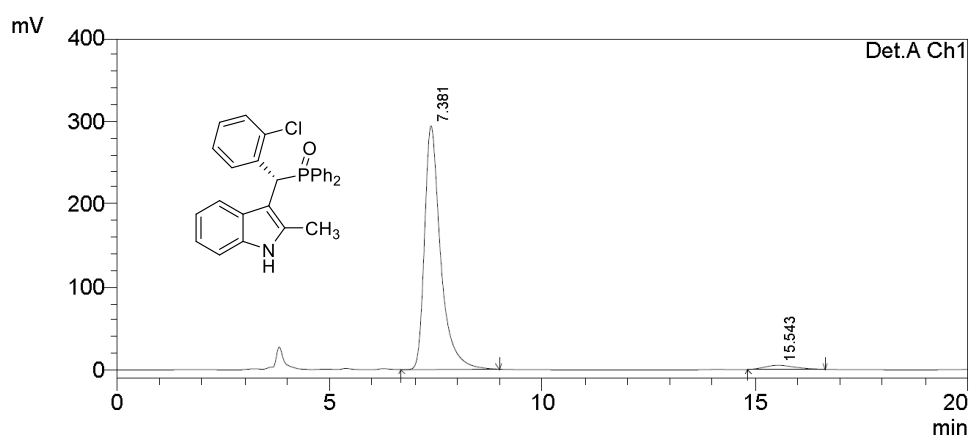

PeakTable

Detector A Ch1 254nm

| Peak# | Ret. Time | Area    | Height | Area %  |
|-------|-----------|---------|--------|---------|
| 1     | 7.381     | 7710278 | 294015 | 96.915  |
| 2     | 15.543    | 245458  | 4860   | 3.085   |
| Total |           | 7955736 |        | 100.000 |

**<sup>1</sup>H NMR spectrum of compound of 3g**

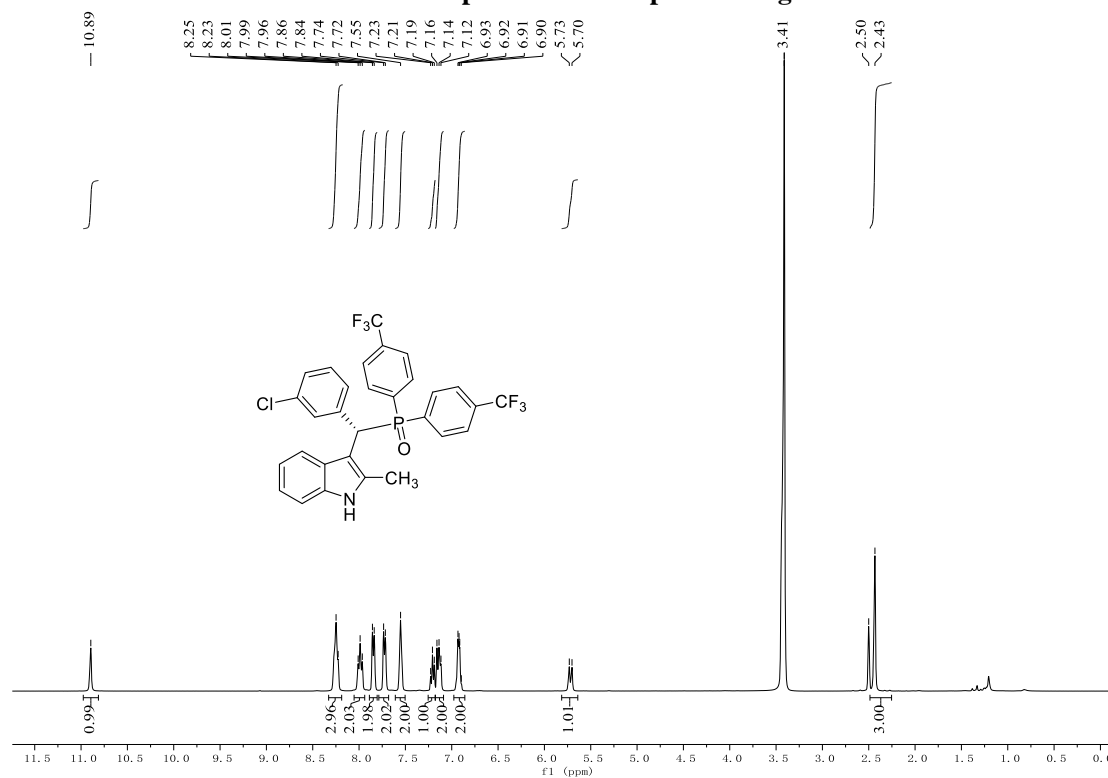

**<sup>13</sup>C NMR spectrum of compound of 3g**

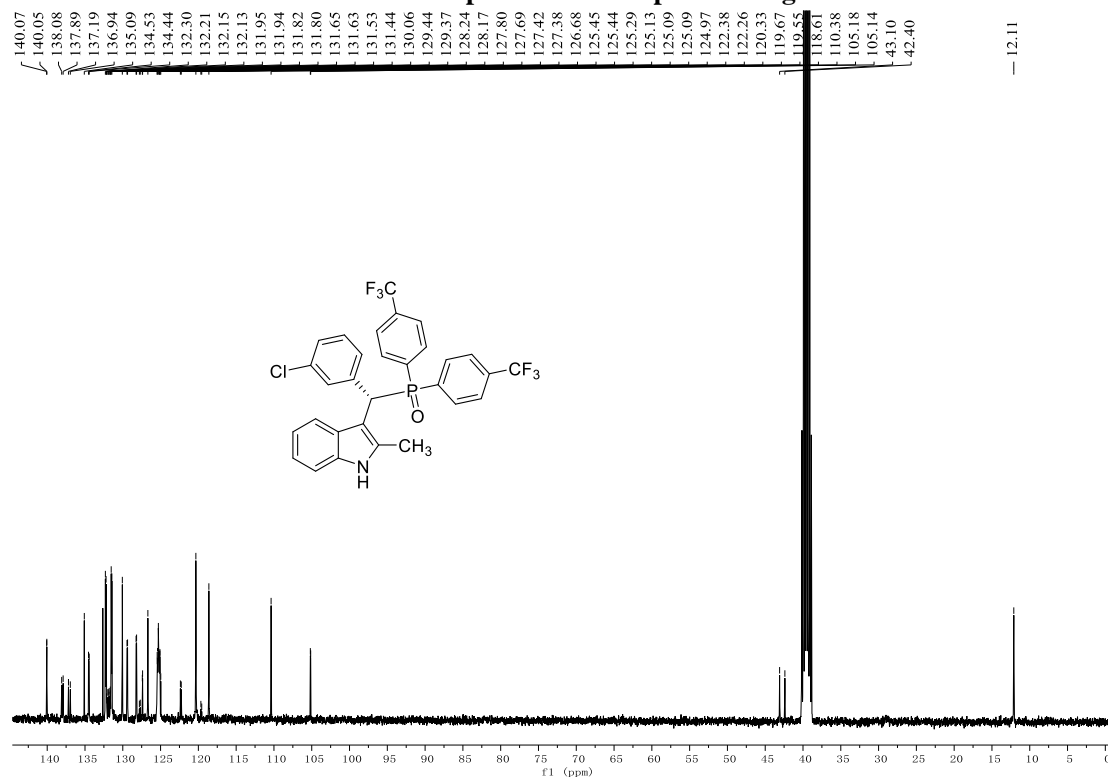

**<sup>31</sup>P NMR spectrum of compound of 3g**

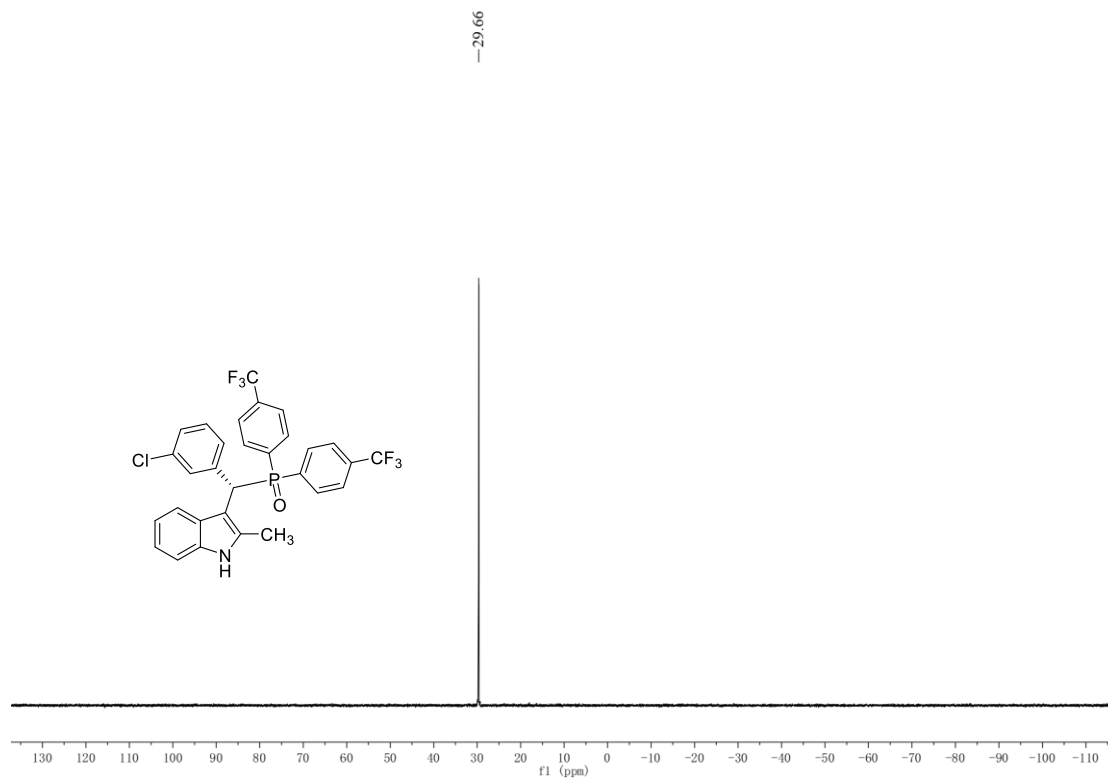

**<sup>19</sup>F NMR spectrum of compound of 3g**

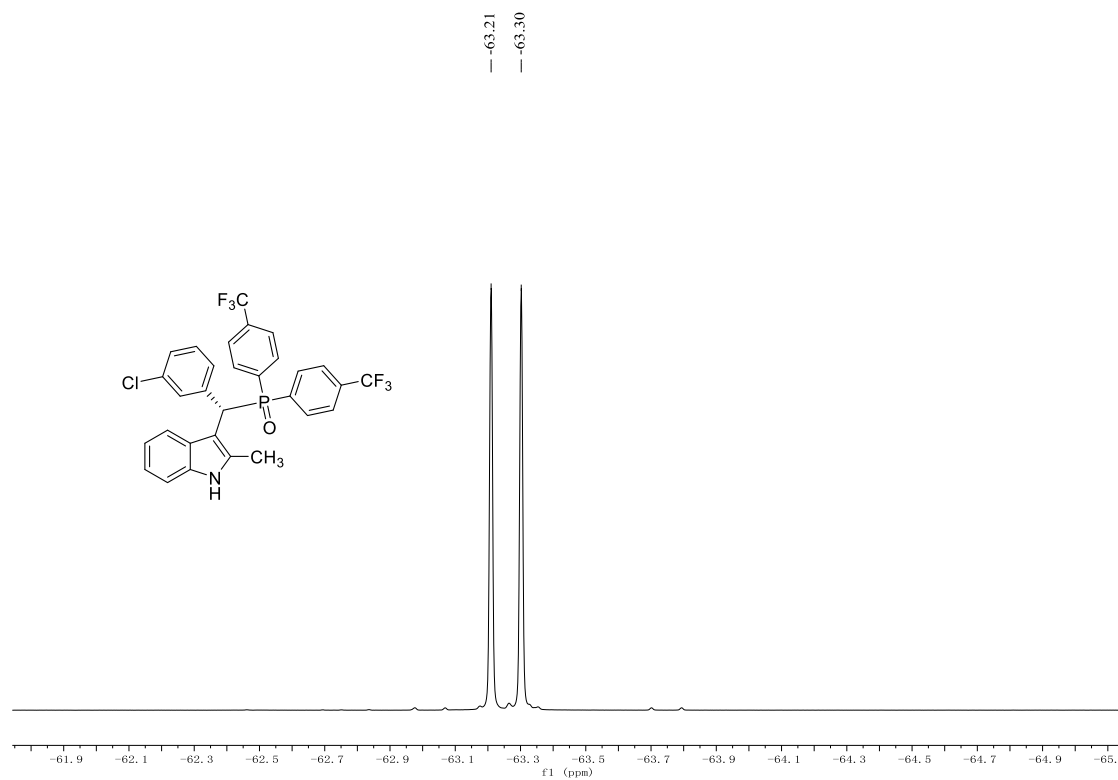

## HPLC spectra of 3g

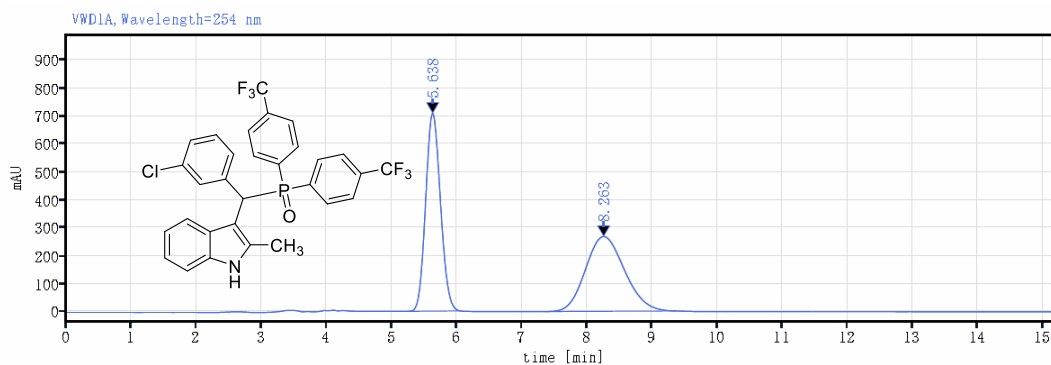

Detector VWD1A, Wavelength=254 nm

| Peak | Ret. Time [min] | Area     | Height | Area%  |
|------|-----------------|----------|--------|--------|
|      | 5.638           | 11173.50 | 706.36 | 50.17  |
|      | 8.263           | 11099.23 | 266.97 | 49.83  |
|      |                 | 22272.73 |        | 100.00 |

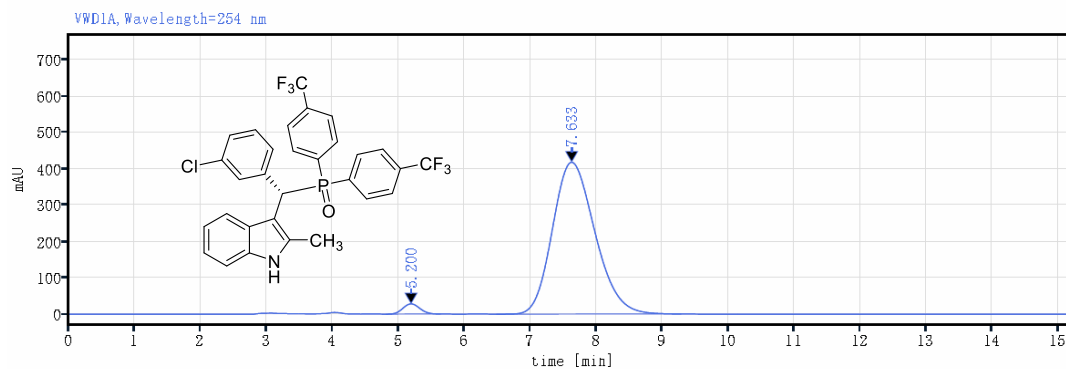

Detector VWD1A, Wavelength=254 nm

| Peak | Ret. Time [min] | Area     | Height | Area%  |
|------|-----------------|----------|--------|--------|
|      | 5.200           | 499.95   | 28.00  | 2.60   |
|      | 7.633           | 18696.87 | 418.48 | 97.40  |
|      |                 | 19196.82 |        | 100.00 |

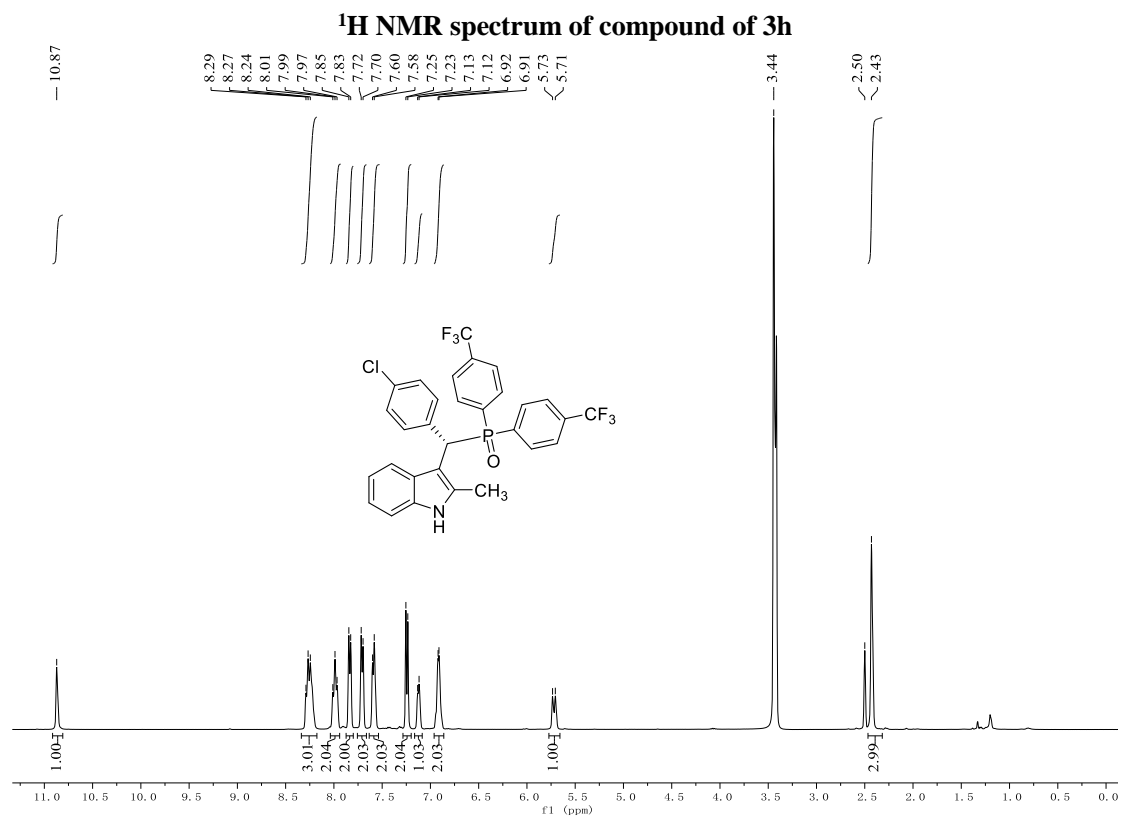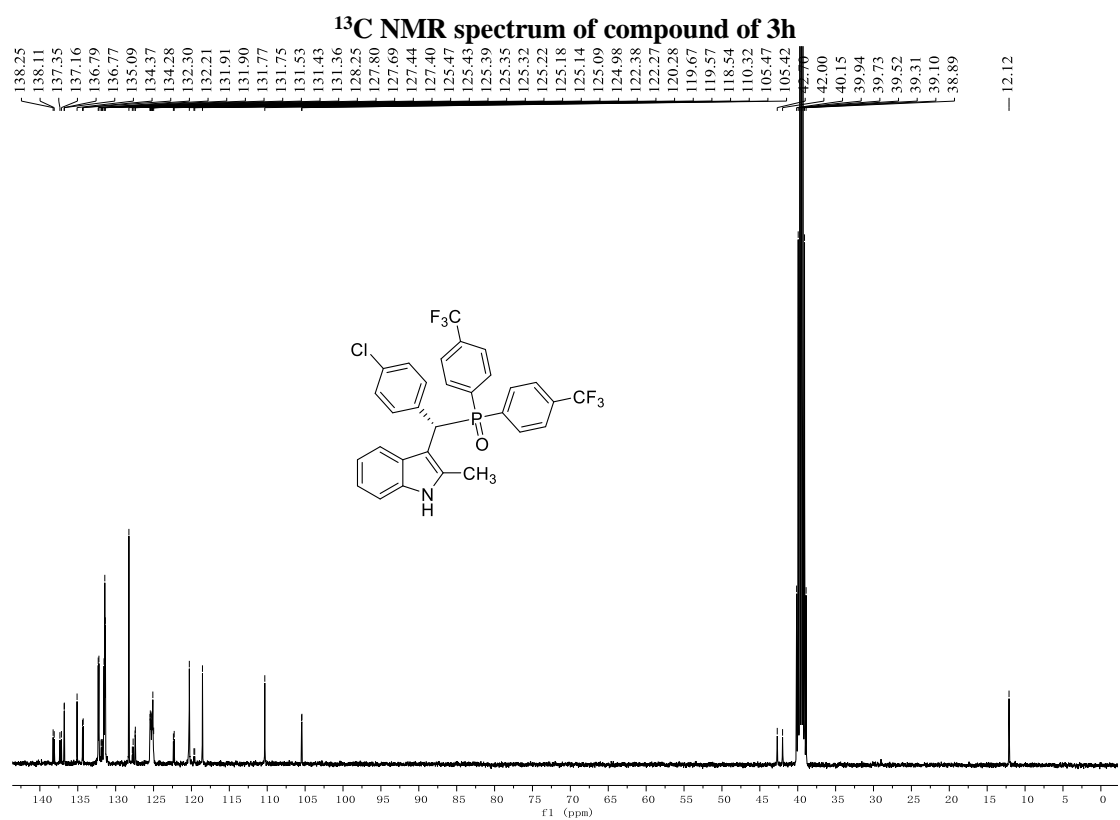

**$^{31}\text{P}$  NMR spectrum of compound of 3h**

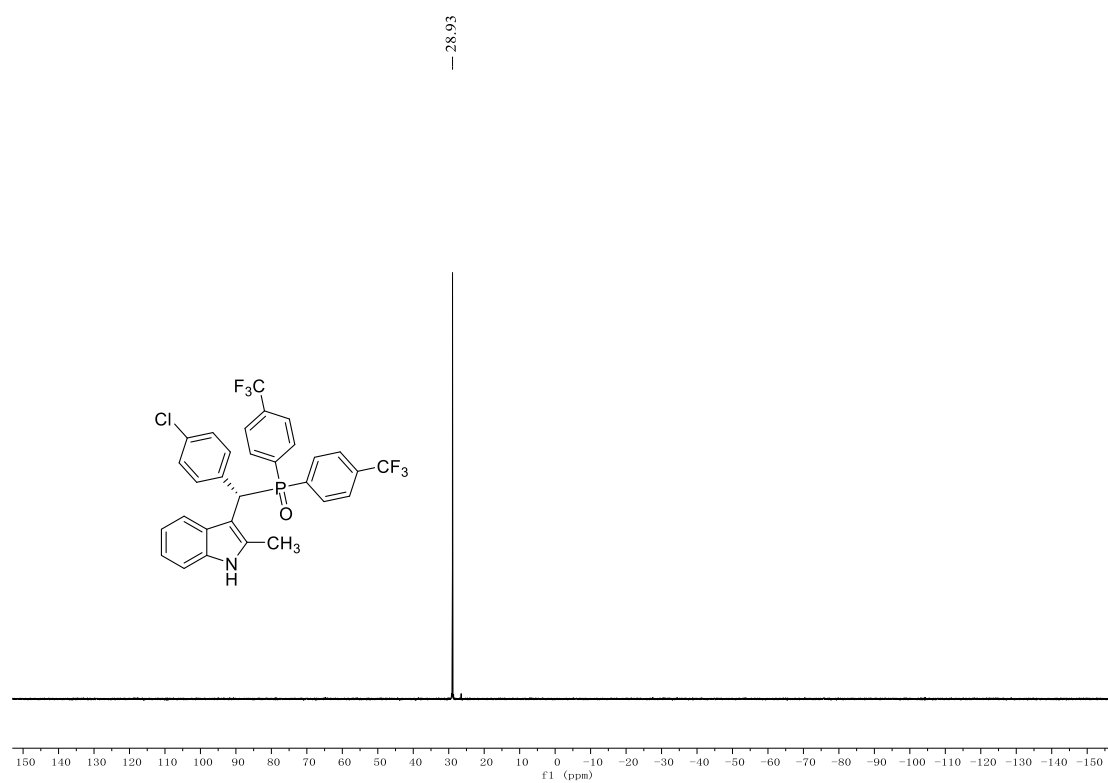

**$^{19}\text{F}$  NMR spectrum of compound of 3h**

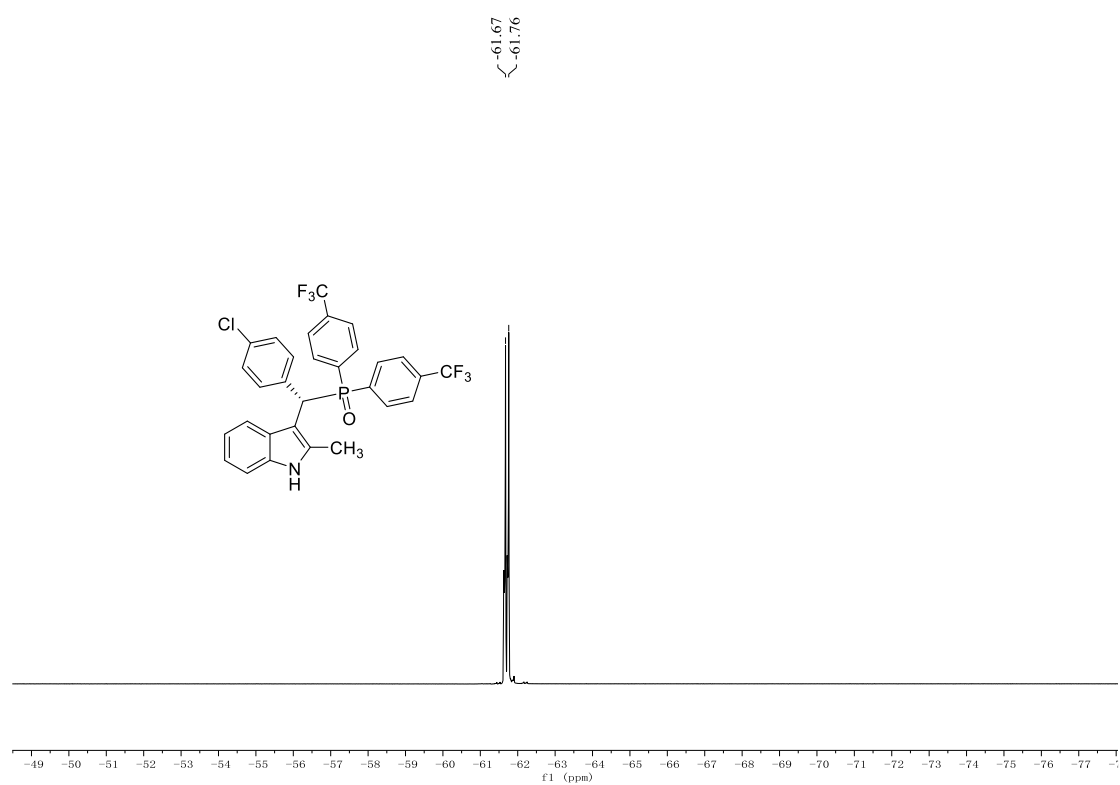



## HPLC spectra of 3h

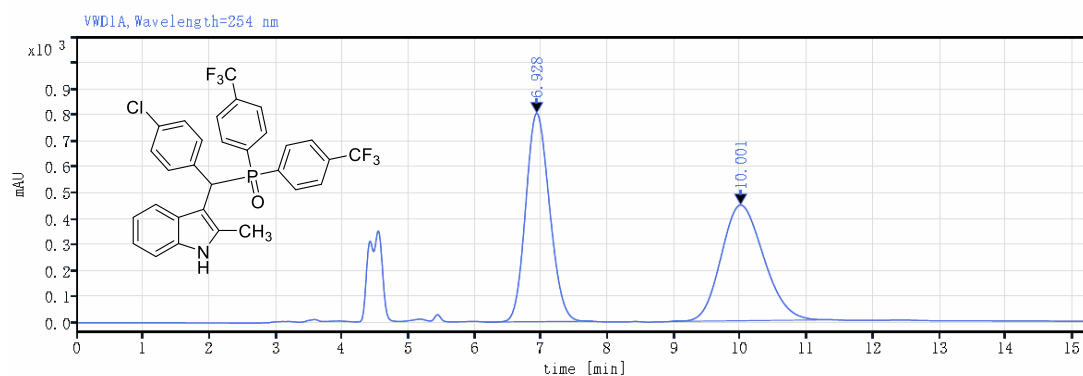

Detector VWD1A, Wavelength=254 nm

| Peak | Ret. Time [min] | Area     | Height | Area%  |
|------|-----------------|----------|--------|--------|
|      | 6.928           | 20018.29 | 803.17 | 50.23  |
|      | 10.001          | 19836.09 | 446.10 | 49.77  |
|      |                 | 39854.38 |        | 100.00 |

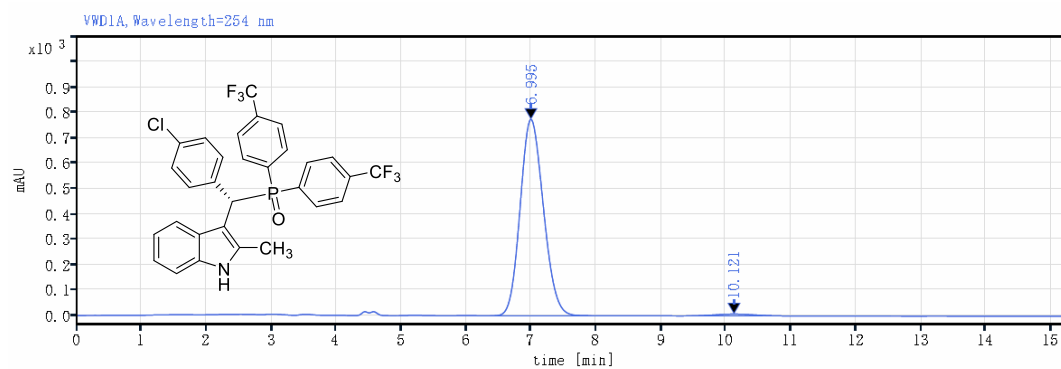

Detector VWD1A, Wavelength=254 nm

| Peak | Ret. Time [min] | Area     | Height | Area%  |
|------|-----------------|----------|--------|--------|
|      | 6.995           | 19282.07 | 775.14 | 98.69  |
|      | 10.121          | 256.65   | 6.68   | 1.31   |
|      |                 | 19538.71 |        | 100.00 |

# <sup>1</sup>H NMR spectrum of compound of 3i

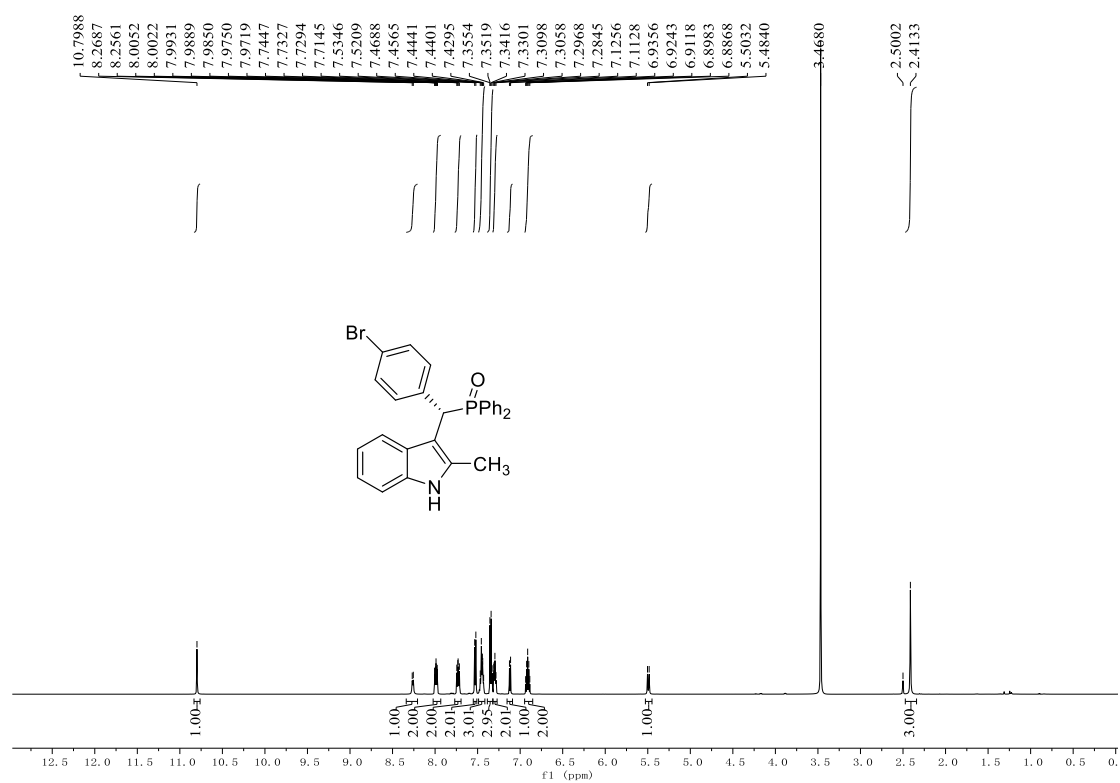

# <sup>13</sup>C NMR, <sup>31</sup>P NMR spectrum of compound of 3i

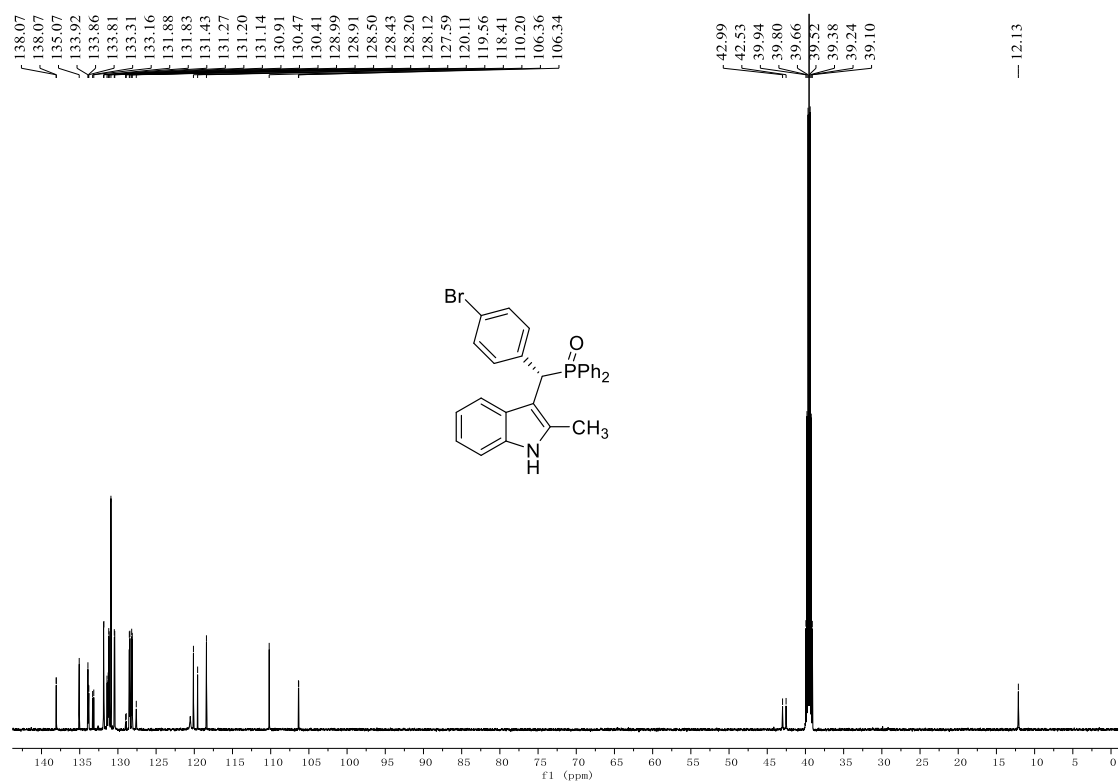

**$^{31}\text{P}$  NMR spectrum of compound of 3i**

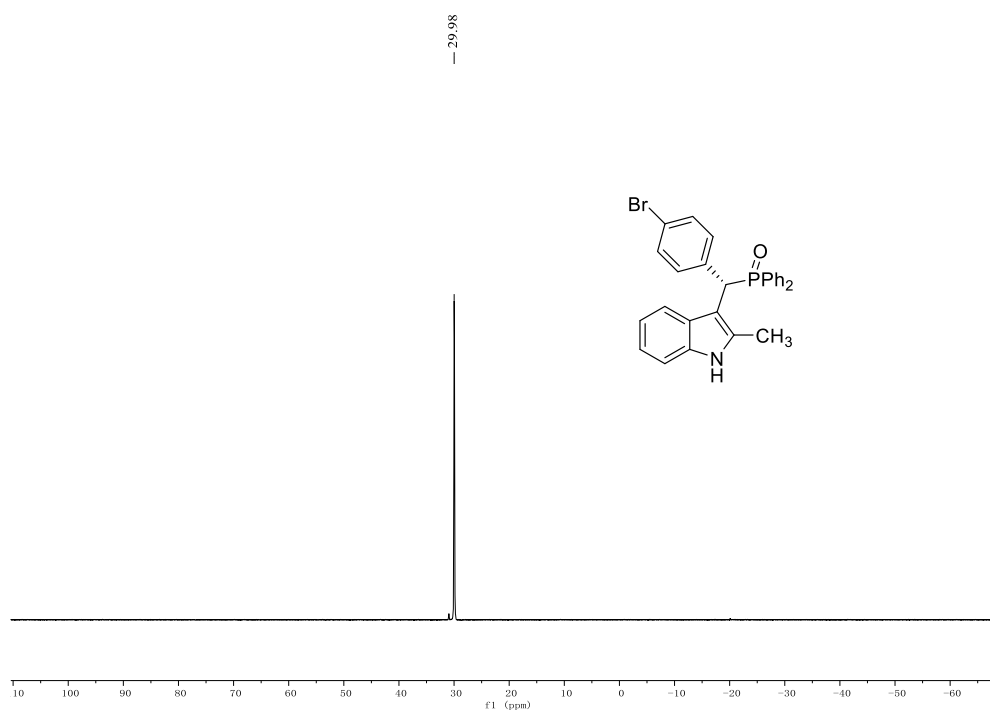

# HPLC spectra of 3i

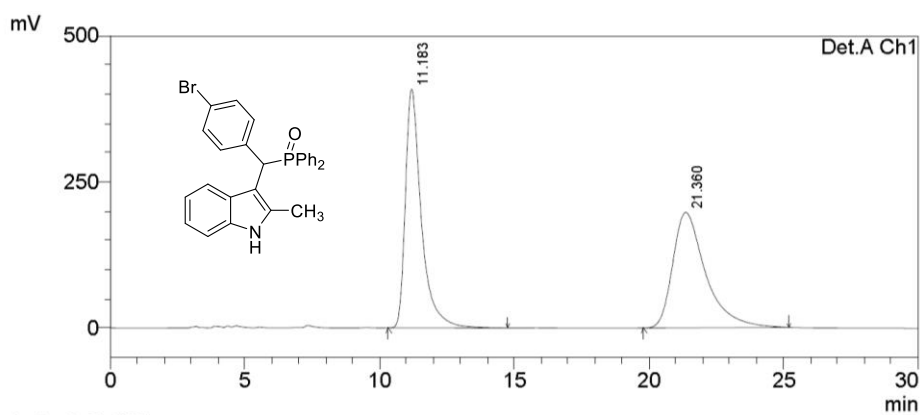

1 Det.A Ch1/254nm

PeakTable

Detector A Ch1 254nm

| Peak# | Ret. Time | Area     | Height | Area %  |
|-------|-----------|----------|--------|---------|
| 1     | 11.183    | 16759495 | 407762 | 50.003  |
| 2     | 21.360    | 16757151 | 197187 | 49.997  |
| Total |           | 33516646 |        | 100.000 |

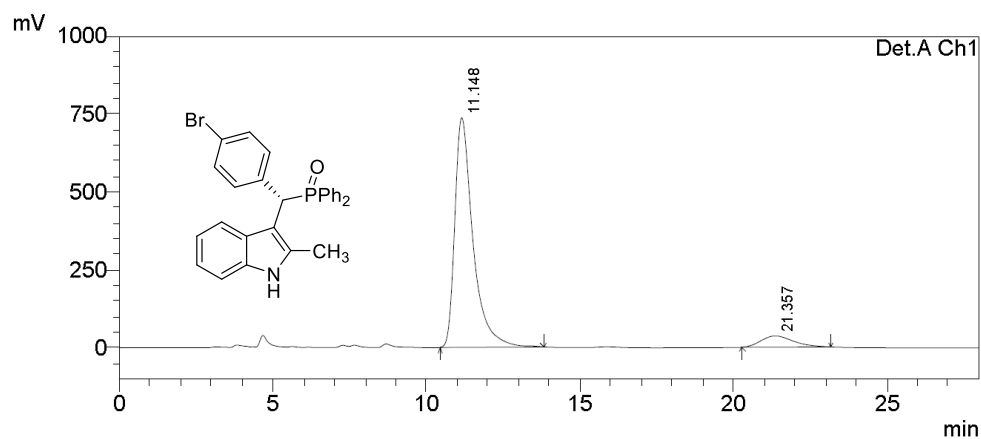

1 Det.A Ch1/254nm

PeakTable

Detector A Ch1 254nm

| Peak# | Ret. Time | Area     | Height | Area %  |
|-------|-----------|----------|--------|---------|
| 1     | 11.148    | 30379044 | 736268 | 92.033  |
| 2     | 21.357    | 2629828  | 36006  | 7.967   |
| Total |           | 33008871 |        | 100.000 |

**<sup>1</sup>H NMR spectrum of compound of 3j**

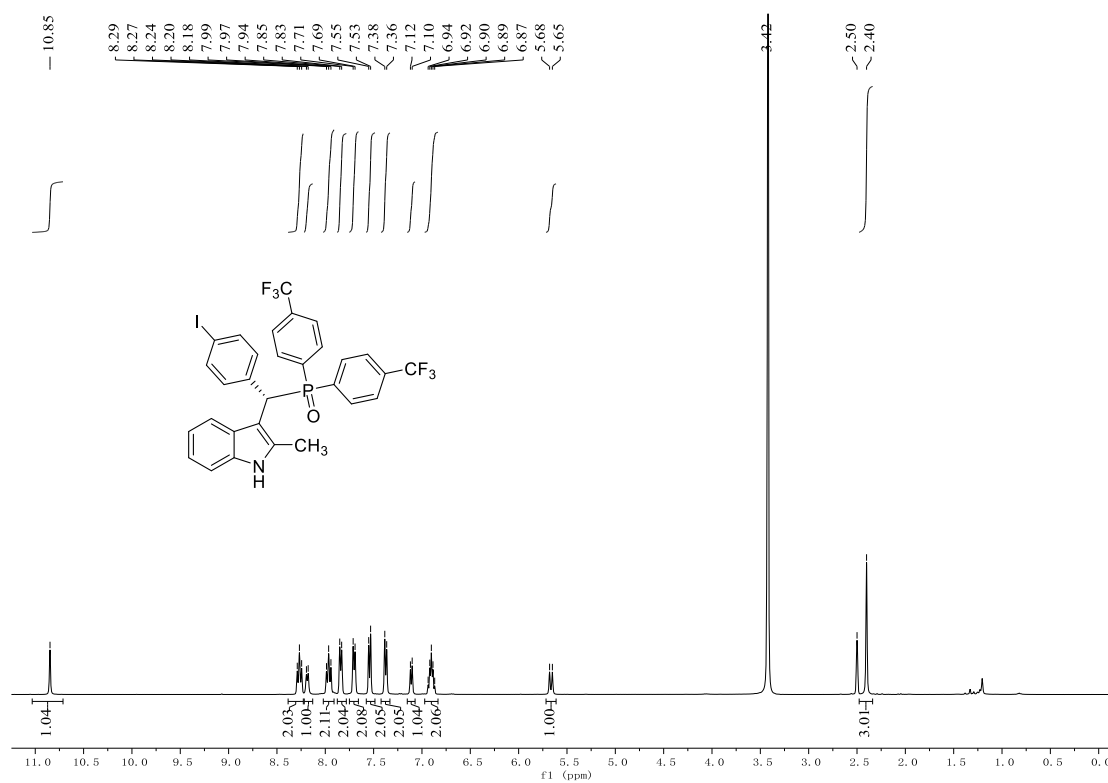

**<sup>13</sup>C NMR spectrum of compound of 3j**

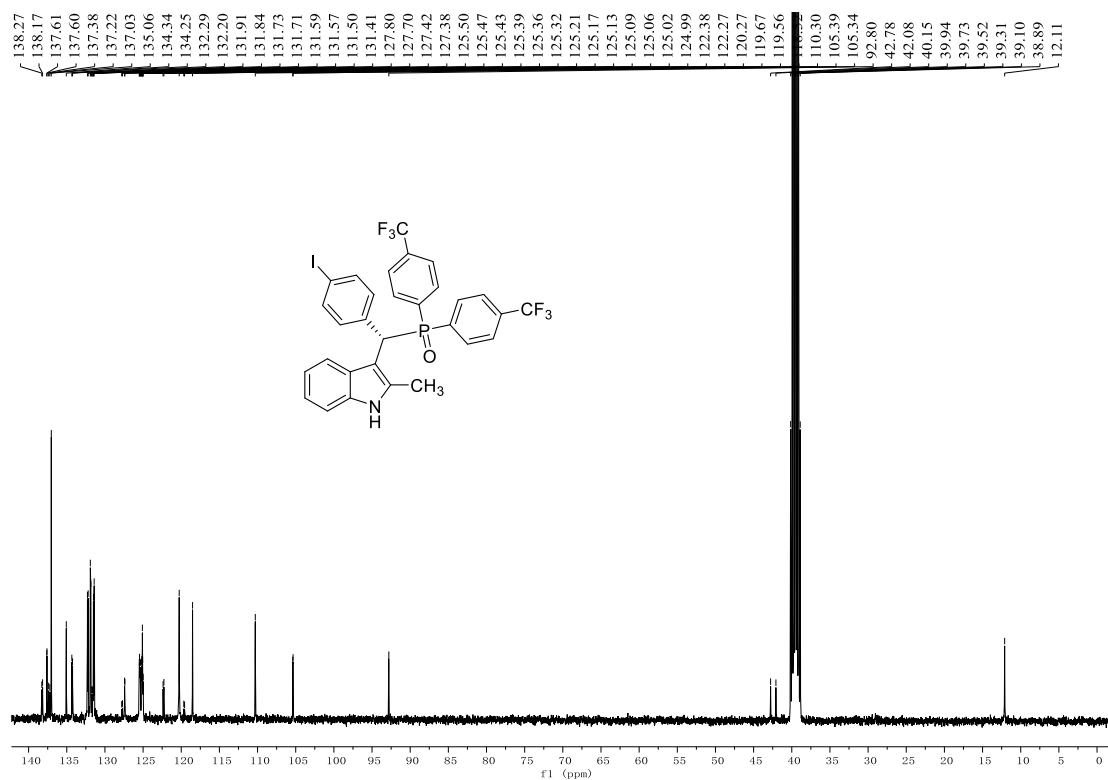

**$^{31}\text{P}$  NMR spectrum of compound of 3j**

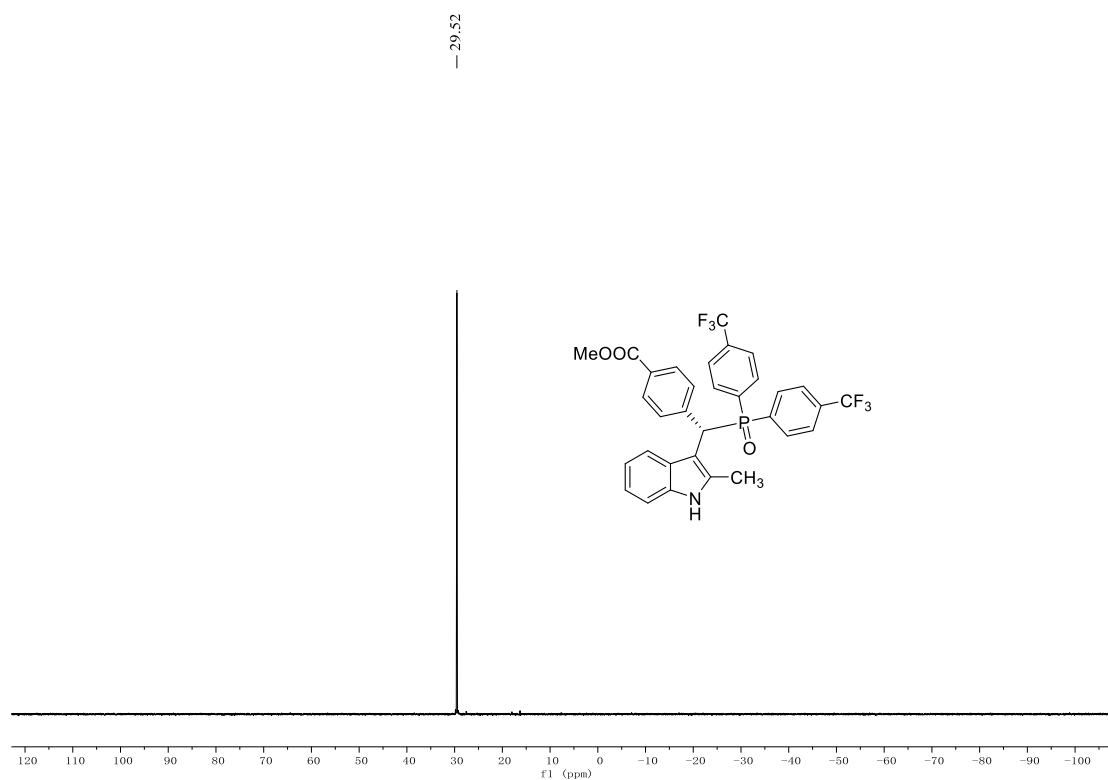

**$^{19}\text{F}$  NMR spectrum of compound of 3j**

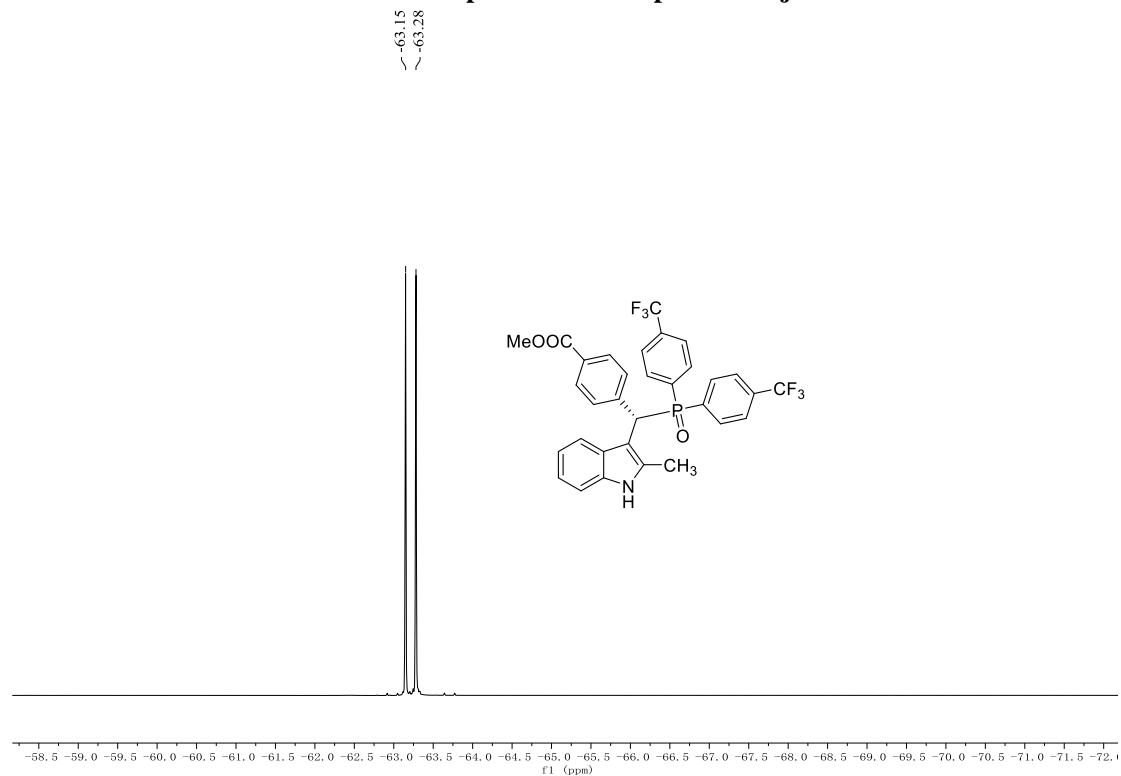

## HPLC spectra of 3j

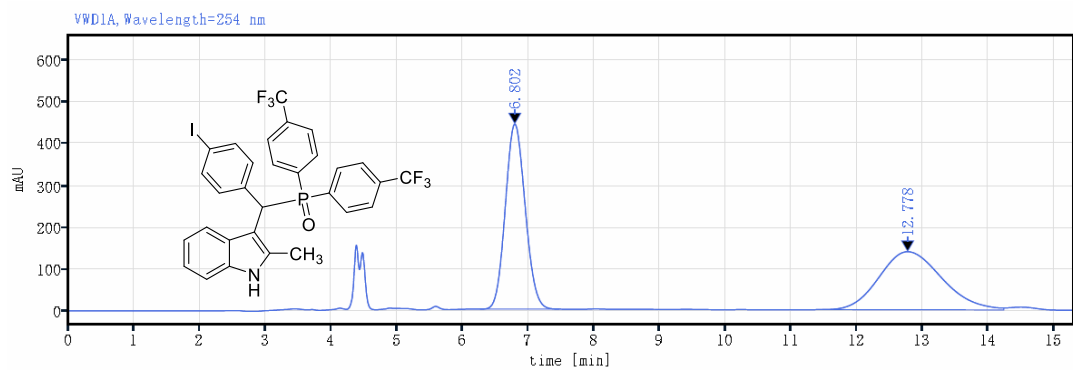

Detector VWD1A, Wavelength=254 nm

| Peak | Ret. Time [min] | Area     | Height | Area%  |
|------|-----------------|----------|--------|--------|
|      | 6.802           | 9310.46  | 443.71 | 50.24  |
|      | 12.778          | 9219.89  | 139.16 | 49.76  |
|      |                 | 18530.35 |        | 100.00 |

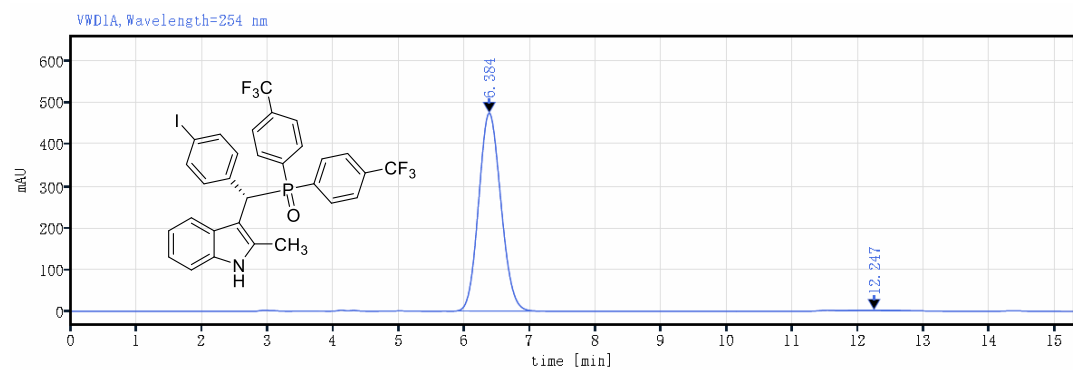

Detector VWD1A, Wavelength=254 nm

| Peak | Ret. Time [min] | Area     | Height | Area%  |
|------|-----------------|----------|--------|--------|
|      | 6.384           | 11166.38 | 475.56 | 99.48  |
|      | 12.247          | 57.88    | 1.36   | 0.52   |
|      |                 | 11224.25 |        | 100.00 |

# <sup>1</sup>H NMR spectrum of compound of 3k

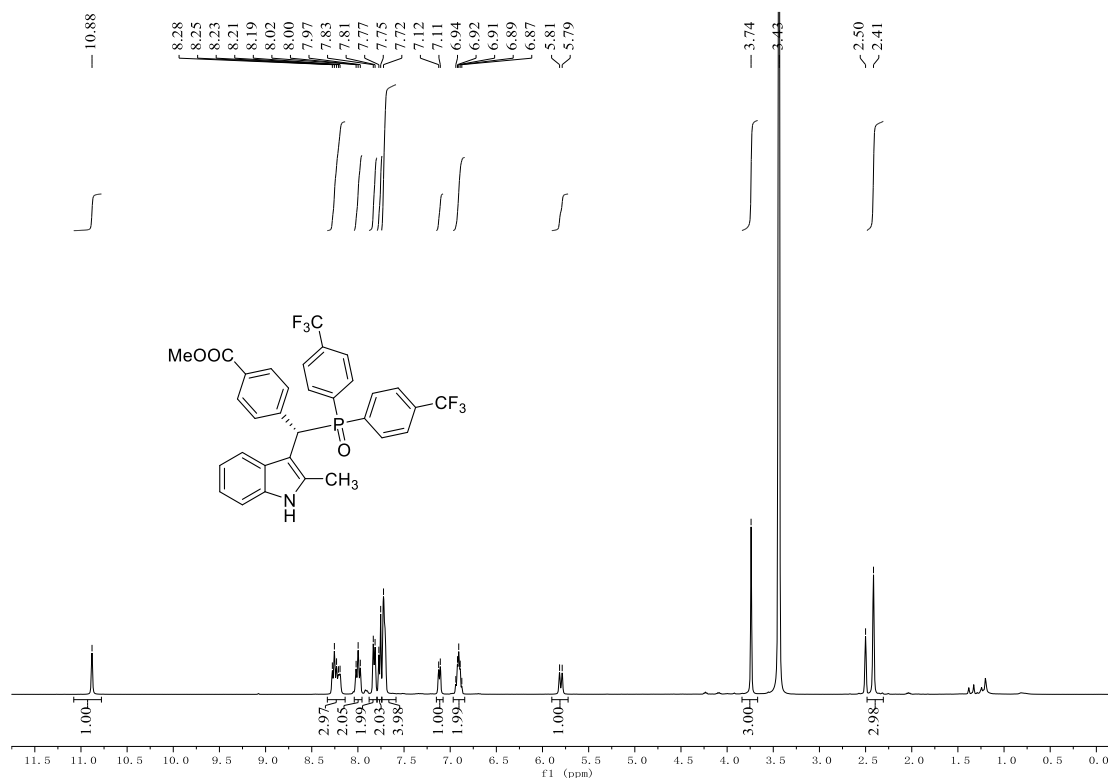

# <sup>13</sup>C NMR spectrum of compound of 3k

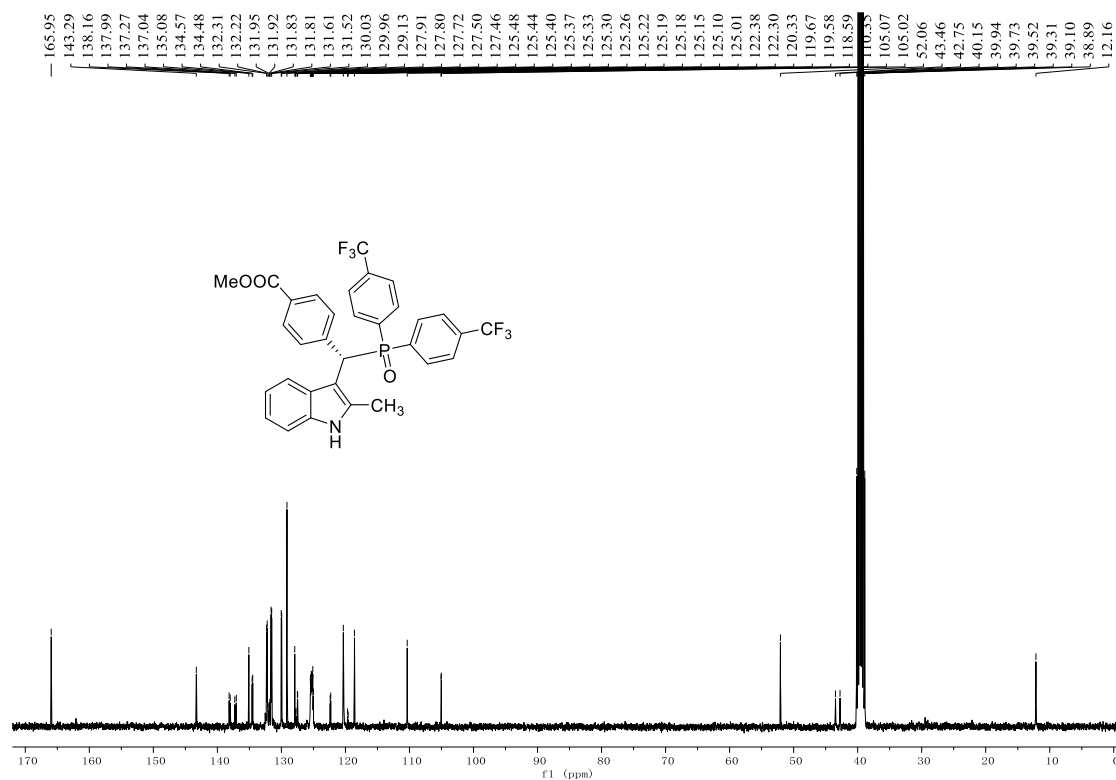



**<sup>31</sup>P NMR spectrum of compound of 3k**

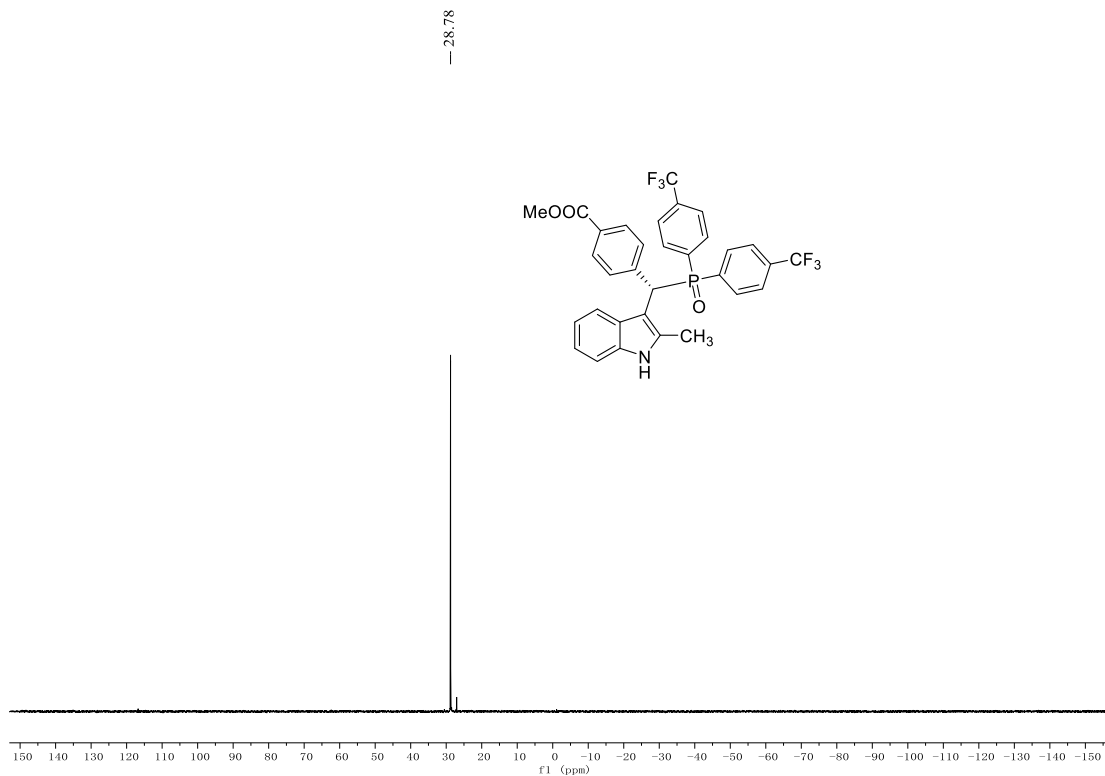

**<sup>19</sup>F NMR spectrum of compound of 3k**

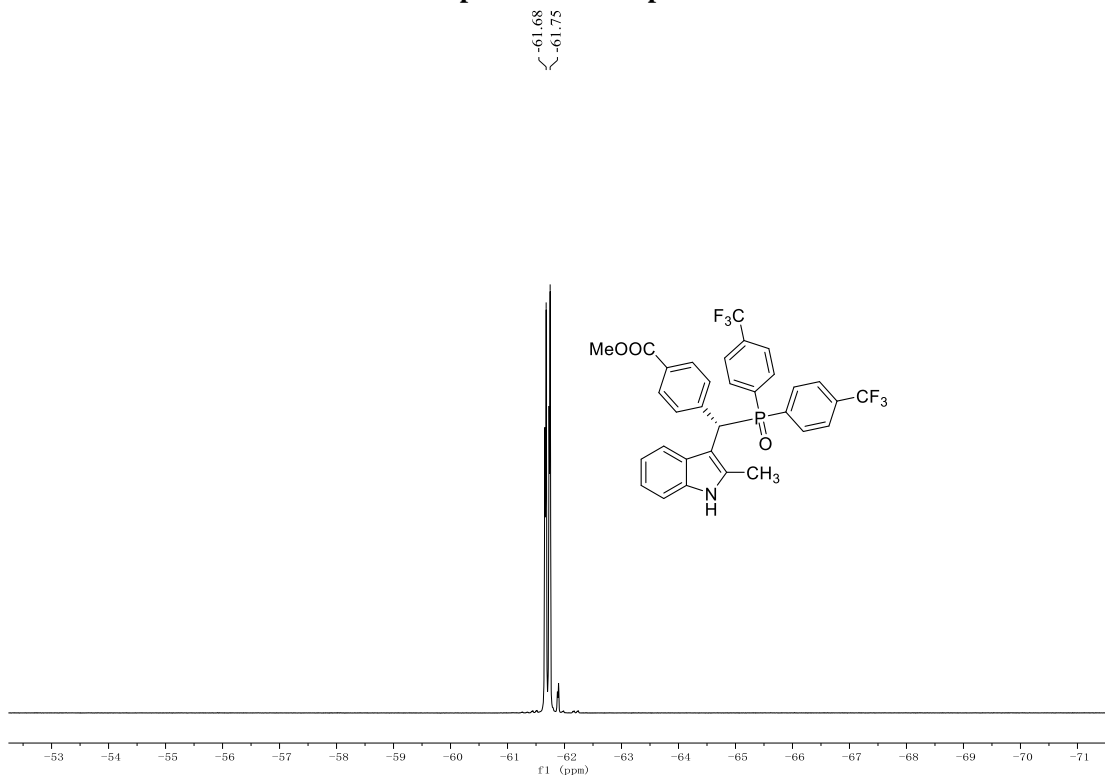

## HPLC spectra of 3k

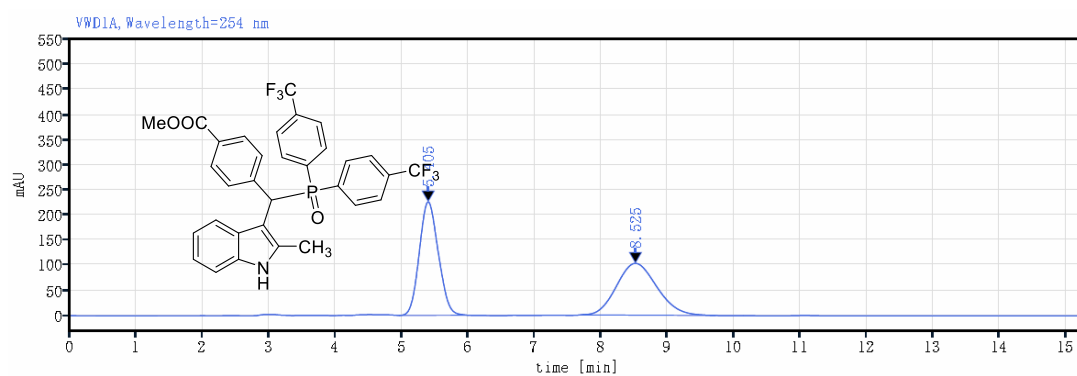

Detector VWD1A, Wavelength=254 nm

| Peak | Ret. Time [min] | Area    | Height | Area%  |
|------|-----------------|---------|--------|--------|
|      | 5.405           | 4494.04 | 226.05 | 50.79  |
|      | 8.525           | 4353.49 | 103.23 | 49.21  |
|      |                 | 8847.52 |        | 100.00 |

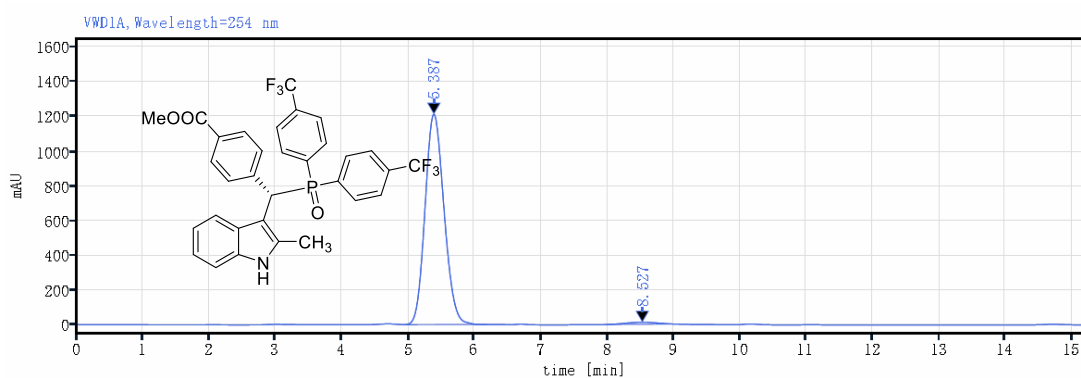

Detector VWD1A, Wavelength=254 nm

| Peak | Ret. Time [min] | Area     | Height  | Area%  |
|------|-----------------|----------|---------|--------|
|      | 5.387           | 24134.97 | 1214.50 | 98.40  |
|      | 8.527           | 391.67   | 11.97   | 1.60   |
|      |                 | 24526.64 |         | 100.00 |

**<sup>1</sup>H NMR spectrum of compound of 3l**

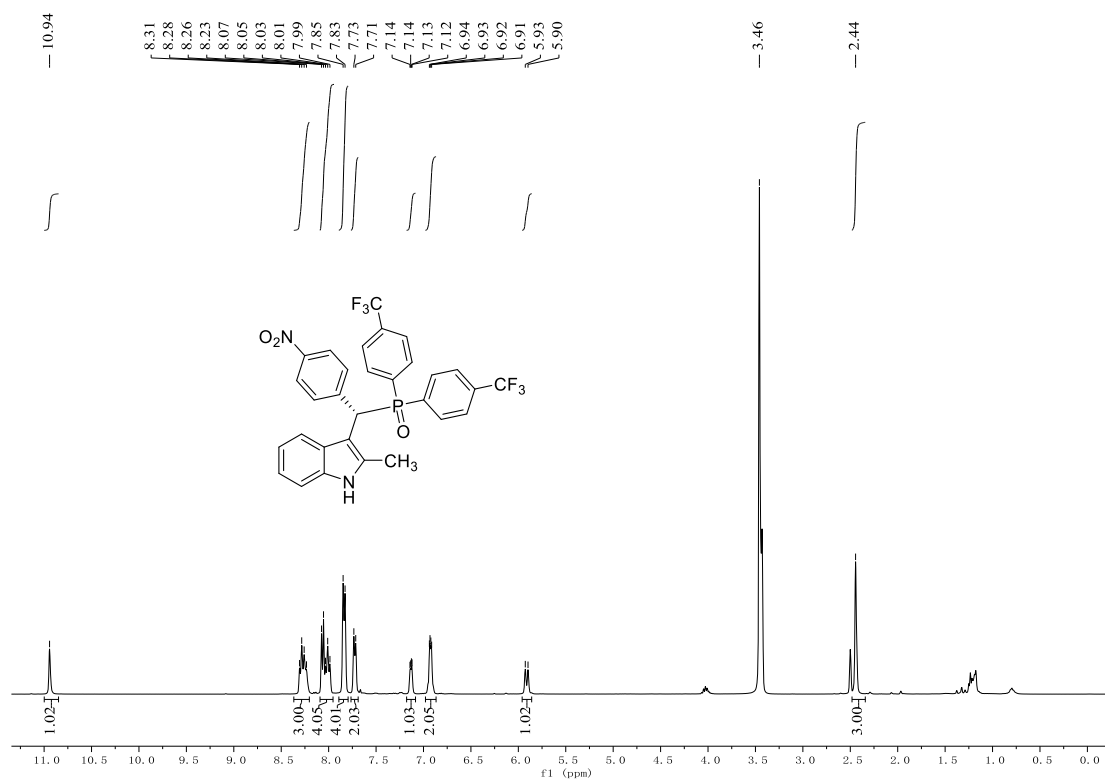

**<sup>13</sup>C NMR spectrum of compound of 3l**

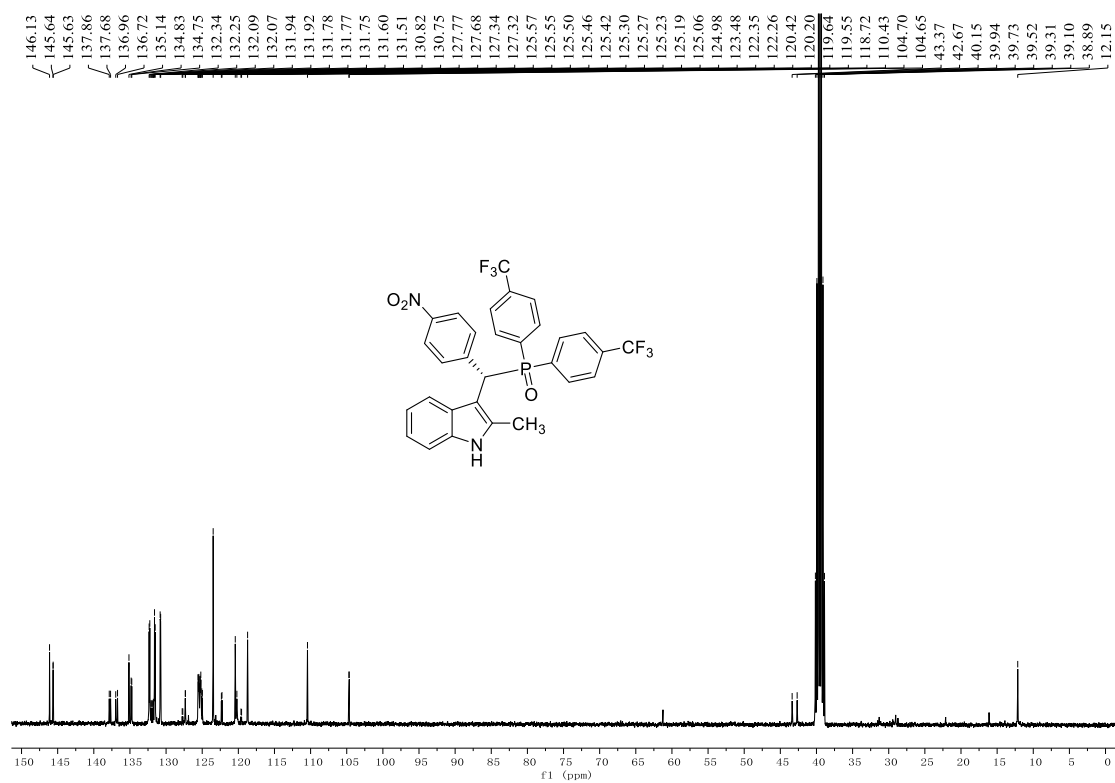

**<sup>31</sup>P NMR spectrum of compound of 3l**

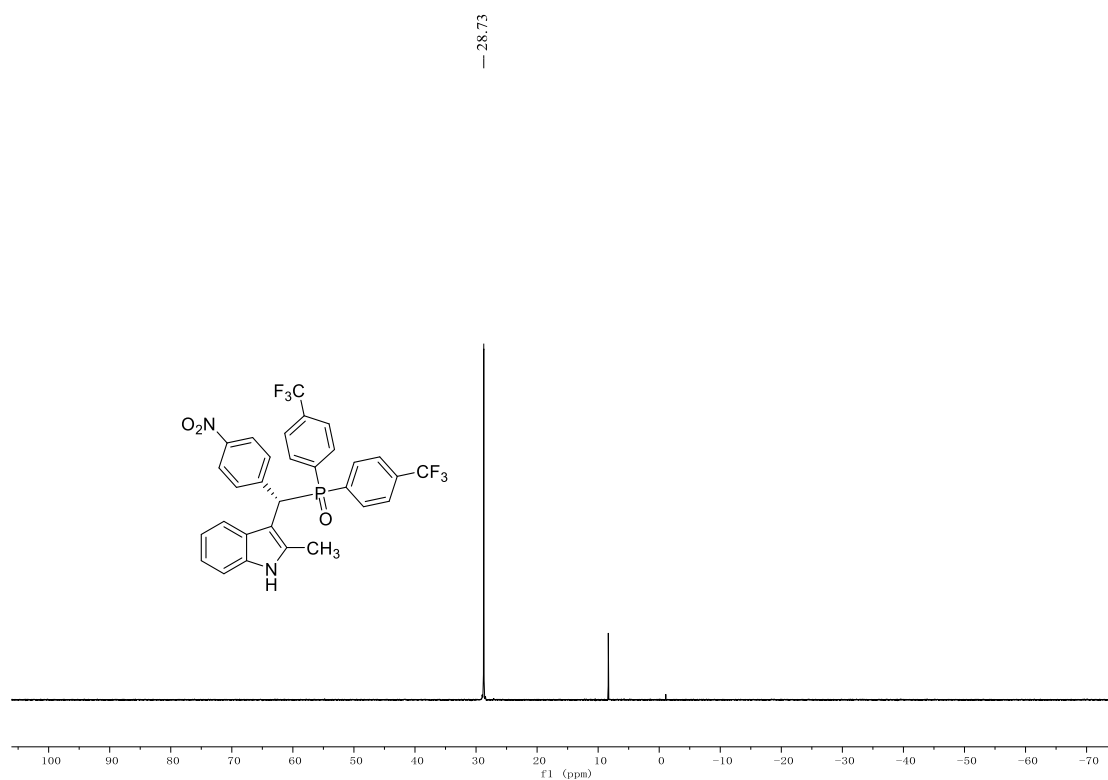

**<sup>19</sup>F NMR spectrum of compound of 3l**

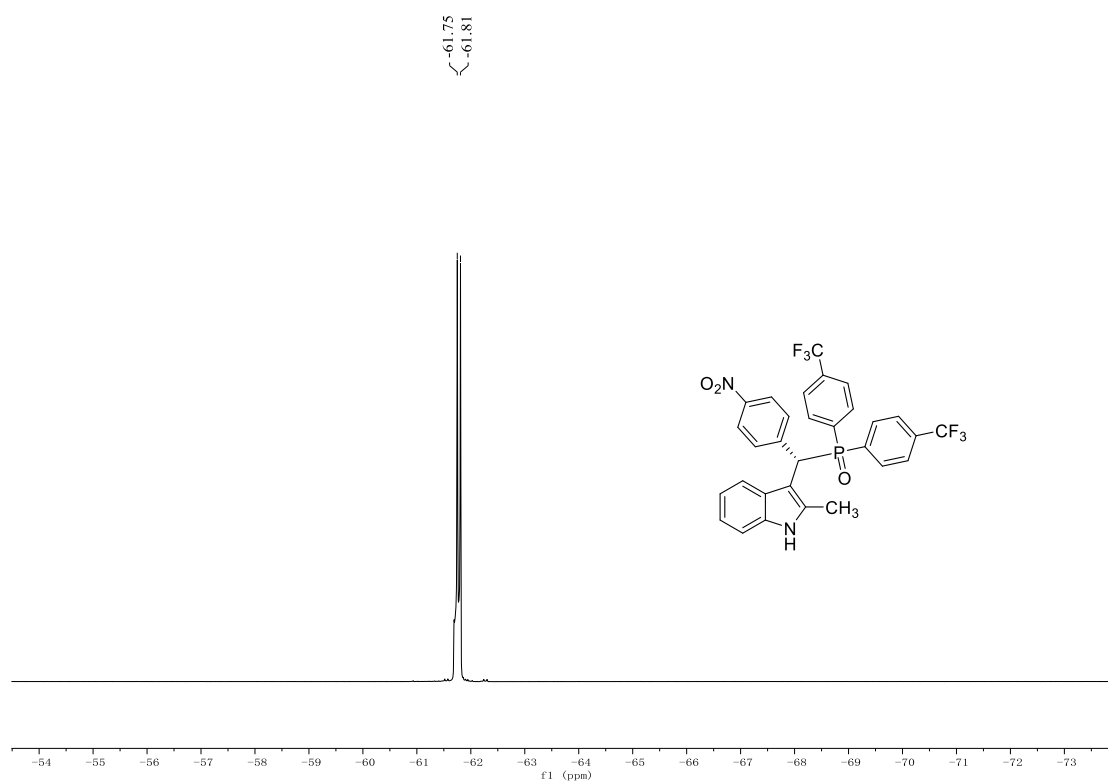

## HPLC spectra of 3l

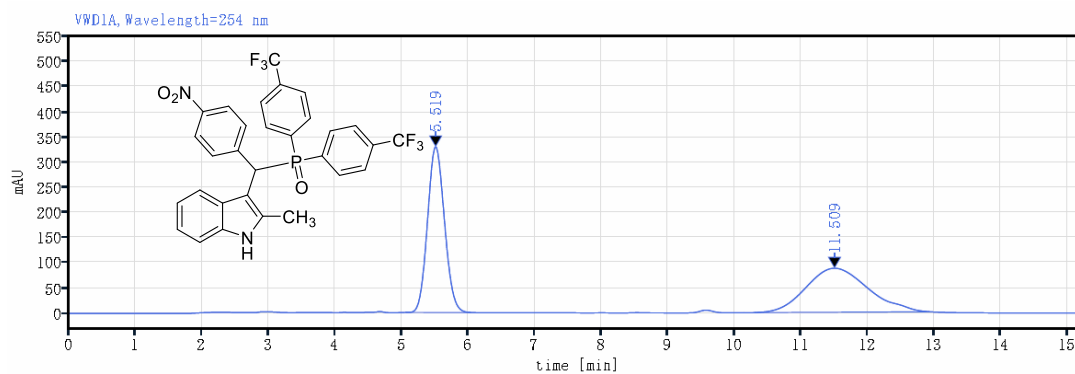

Detector VWD1A, Wavelength=254 nm

| Peak | Ret. Time [min] | Area     | Height | Area%  |
|------|-----------------|----------|--------|--------|
|      | 5.519           | 5819.81  | 329.10 | 50.77  |
|      | 11.509          | 5643.33  | 87.36  | 49.23  |
|      |                 | 11463.14 |        | 100.00 |

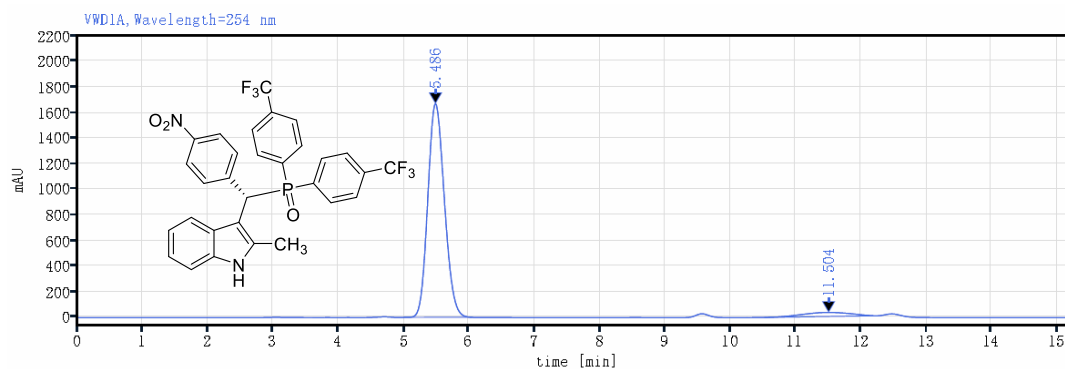

Detector VWD1A, Wavelength=254 nm

| Peak | Ret. Time [min] | Area     | Height  | Area%  |
|------|-----------------|----------|---------|--------|
|      | 5.486           | 29429.58 | 1665.49 | 94.81  |
|      | 11.504          | 1612.39  | 31.40   | 5.19   |
|      |                 | 31041.98 |         | 100.00 |

# **<sup>1</sup>H NMR spectrum of compound of 3m**

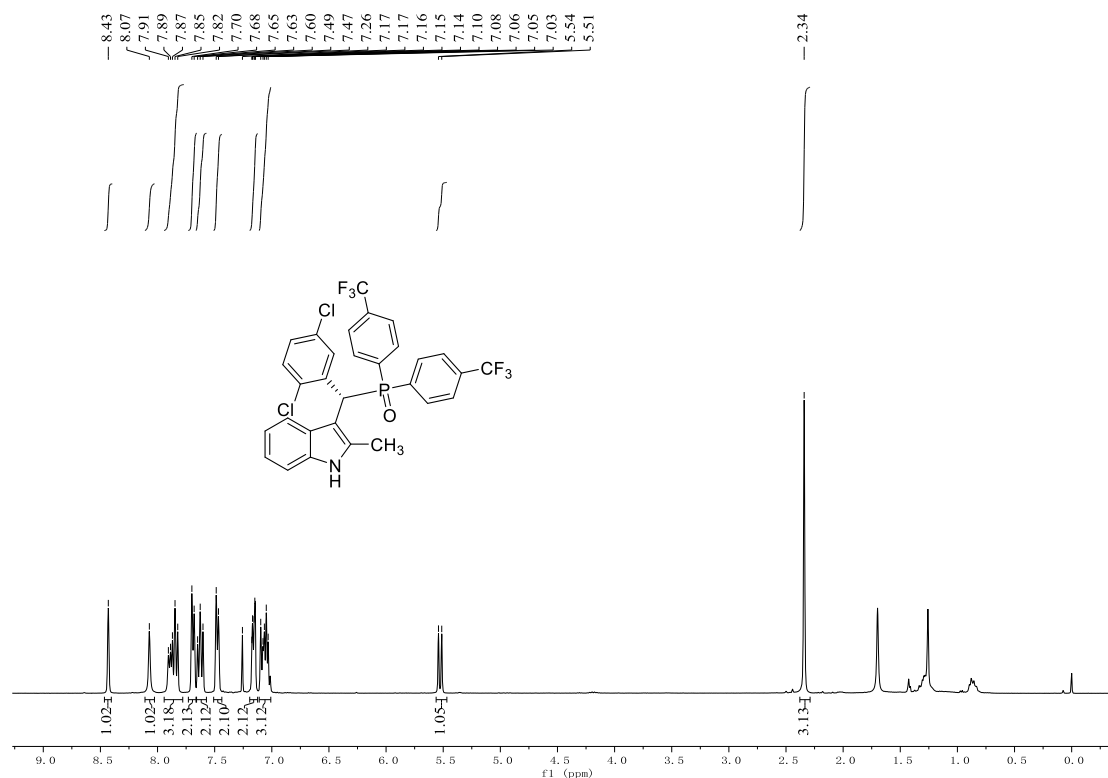

# **<sup>13</sup>C NMR spectrum of compound of 3m**

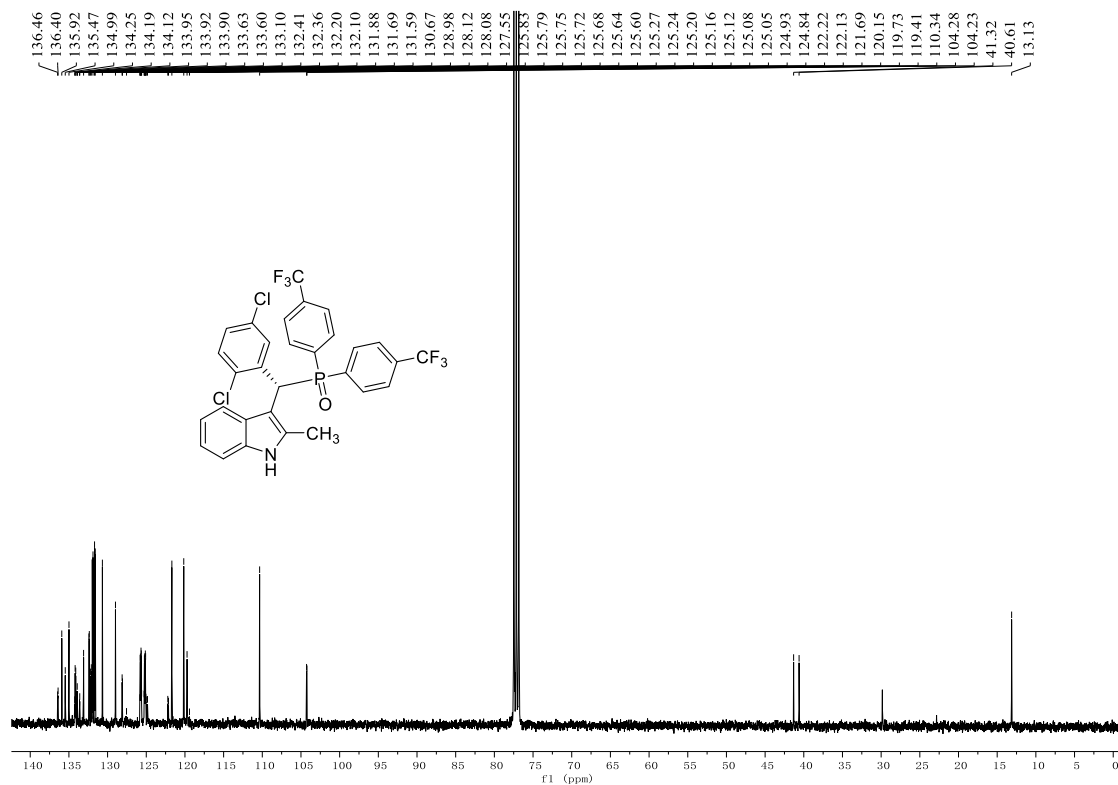

**$^{31}\text{P}$  NMR spectrum of compound of 3m**

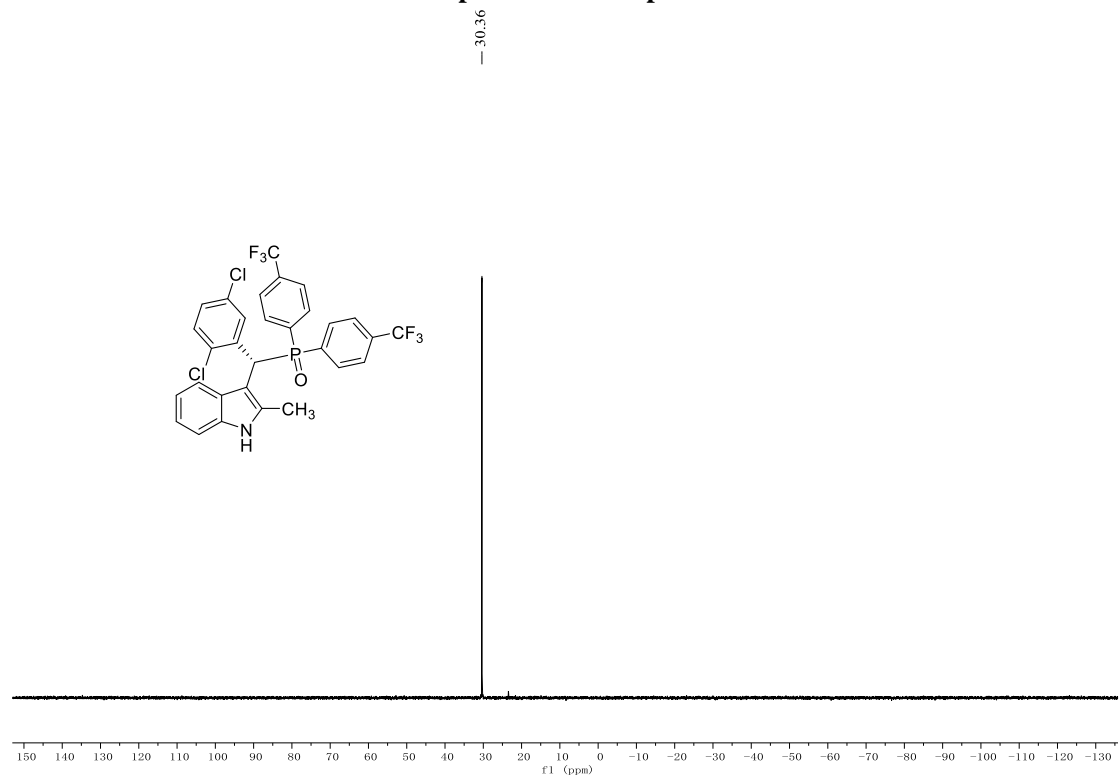

**$^{19}\text{F}$  NMR spectrum of compound of 3m**

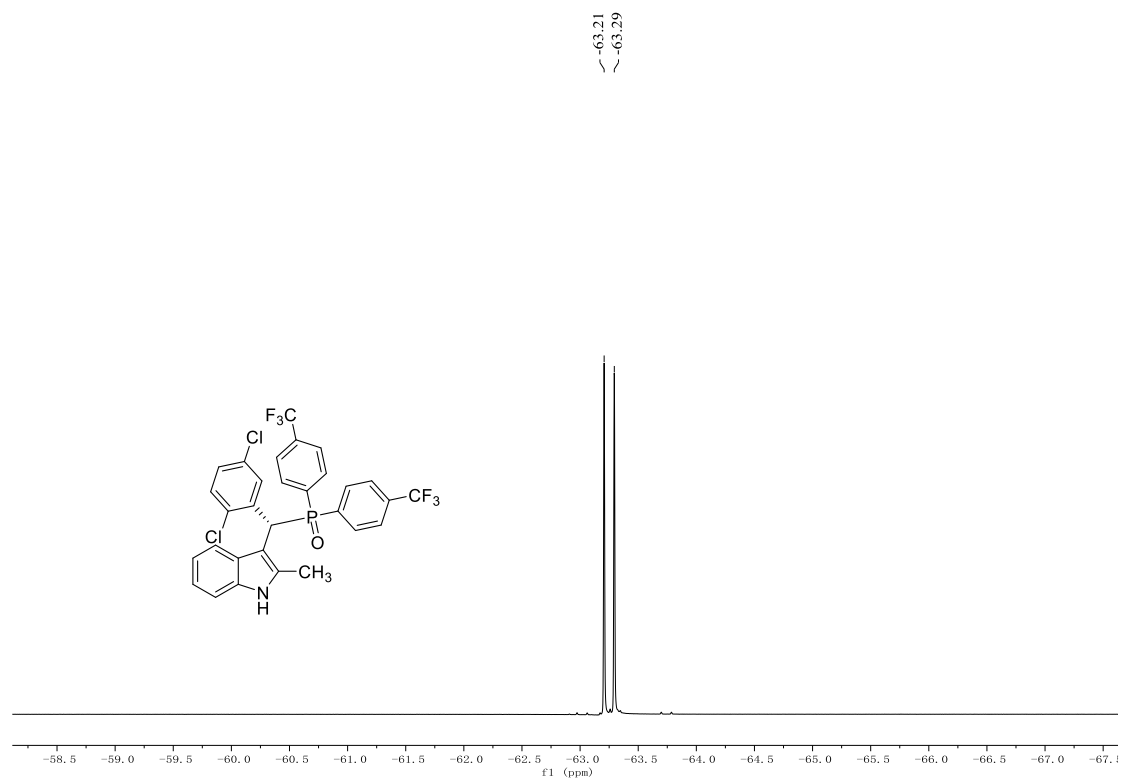

## HPLC spectra of 3m

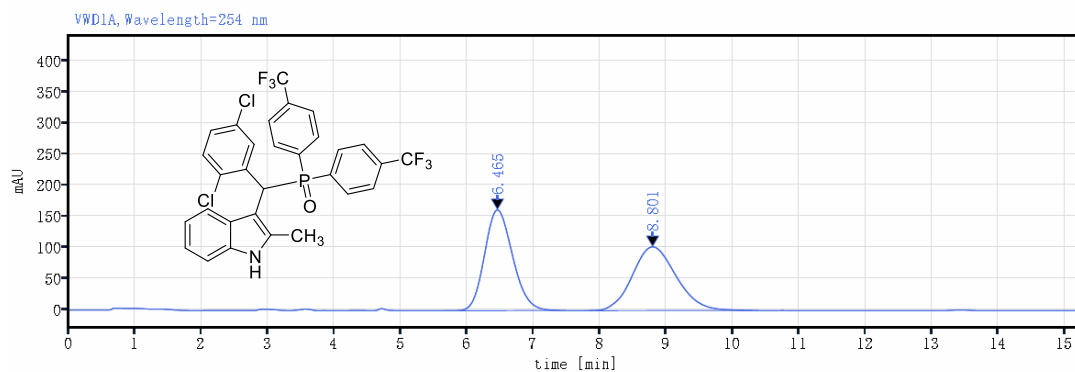

Detector VWD1A, Wavelength=254 nm

| Peak | Ret. Time [min] | Area    | Height | Area%  |
|------|-----------------|---------|--------|--------|
|      | 6.465           | 4747.71 | 162.02 | 50.28  |
|      | 8.801           | 4694.36 | 102.51 | 49.72  |
|      |                 | 9442.07 |        | 100.00 |

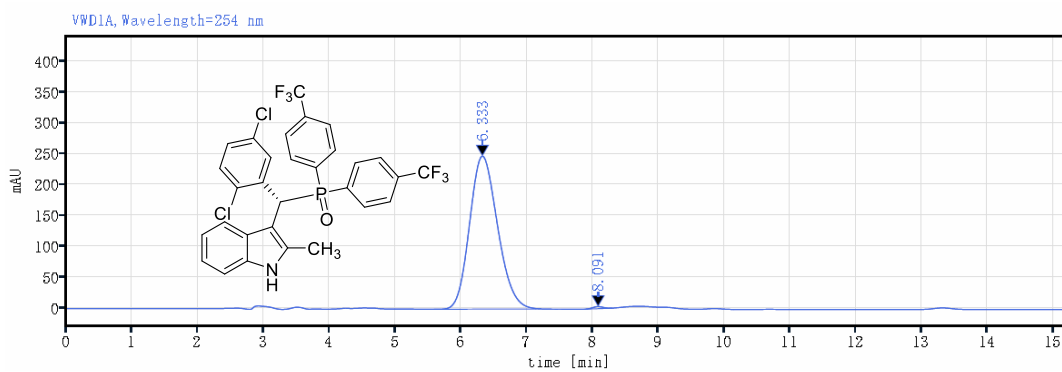

Detector VWD1A, Wavelength=254 nm

| Peak | Ret. Time [min] | Area    | Height | Area%  |
|------|-----------------|---------|--------|--------|
|      | 6.333           | 7326.90 | 248.08 | 99.49  |
|      | 8.091           | 37.41   | 3.42   | 0.51   |
|      |                 | 7364.31 |        | 100.00 |



**<sup>1</sup>H NMR spectrum of compound of 3n**

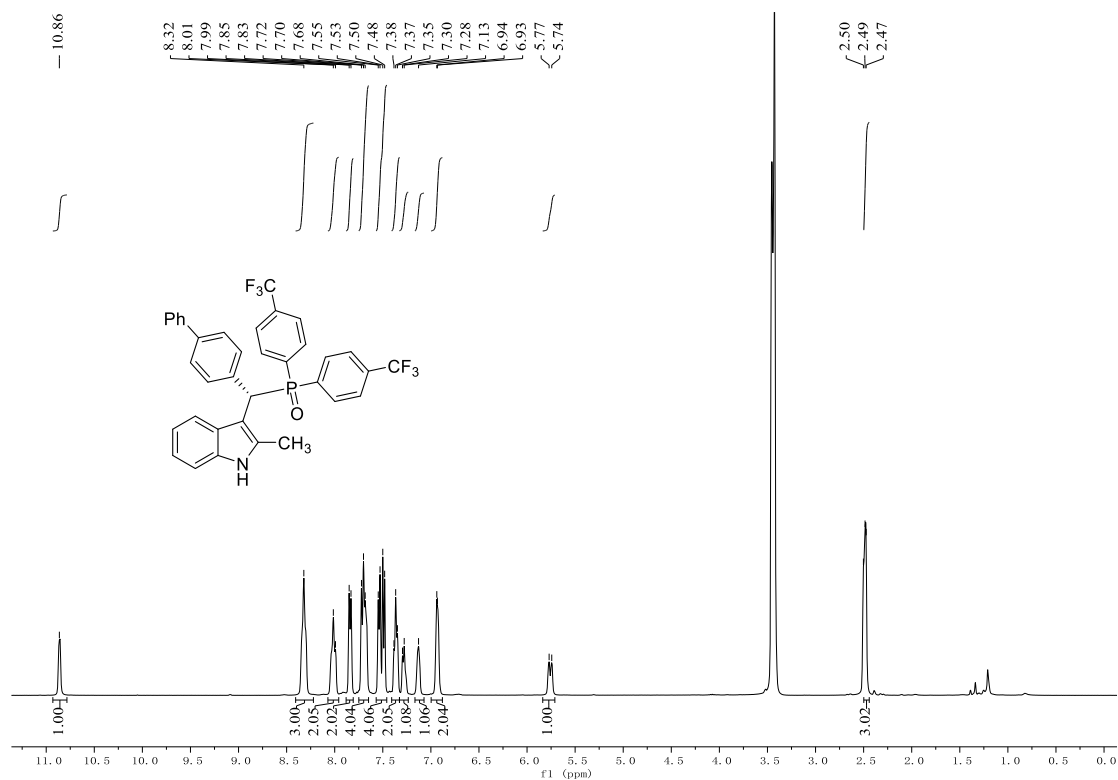

**<sup>13</sup>C NMR spectrum of compound of 3n**

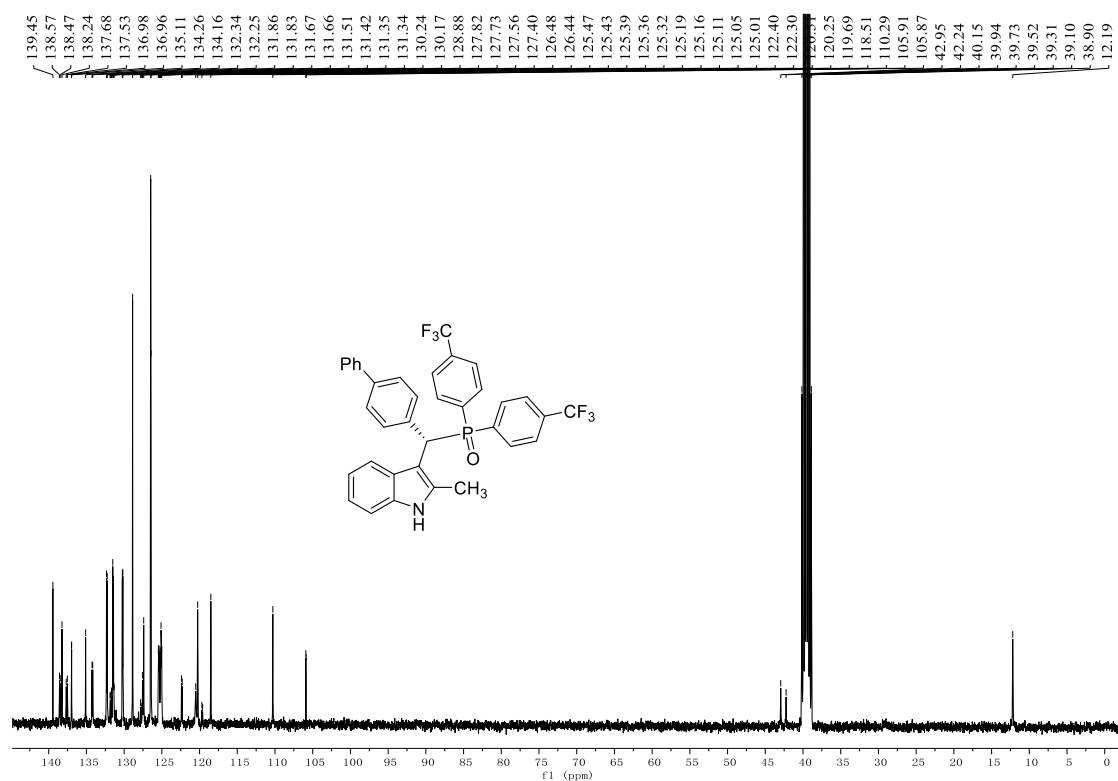

**<sup>31</sup>P NMR spectrum of compound of 3n**

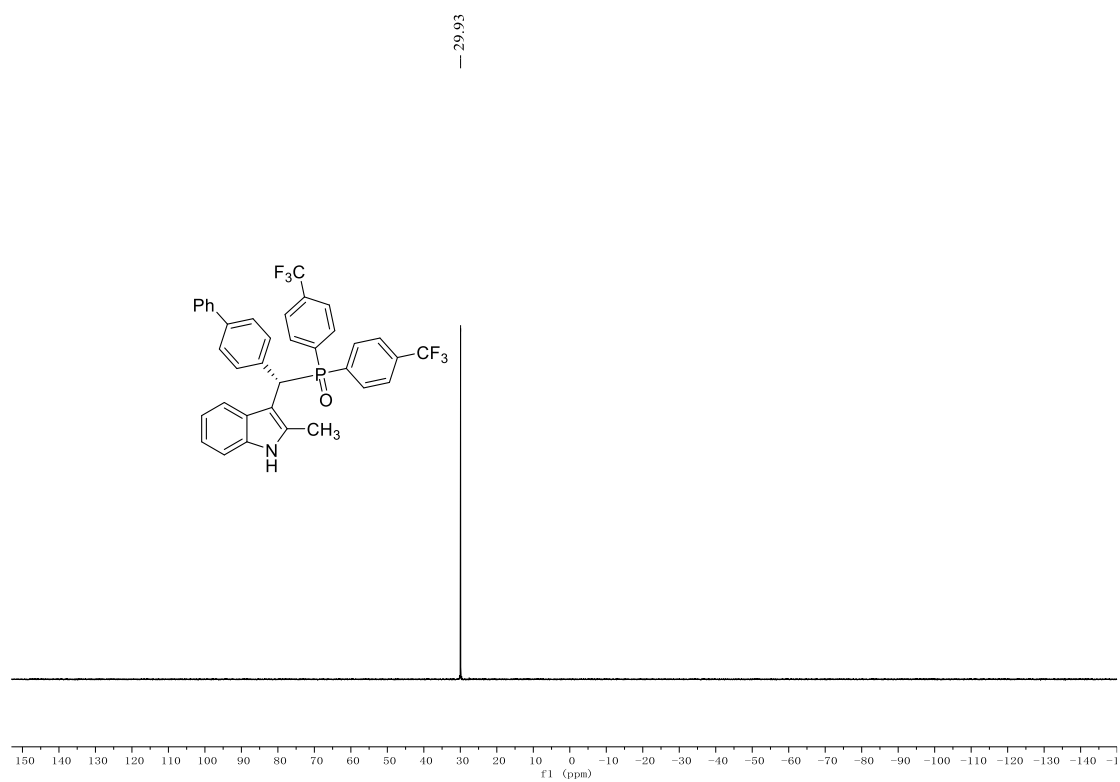

**<sup>19</sup>F NMR spectrum of compound of 3n**

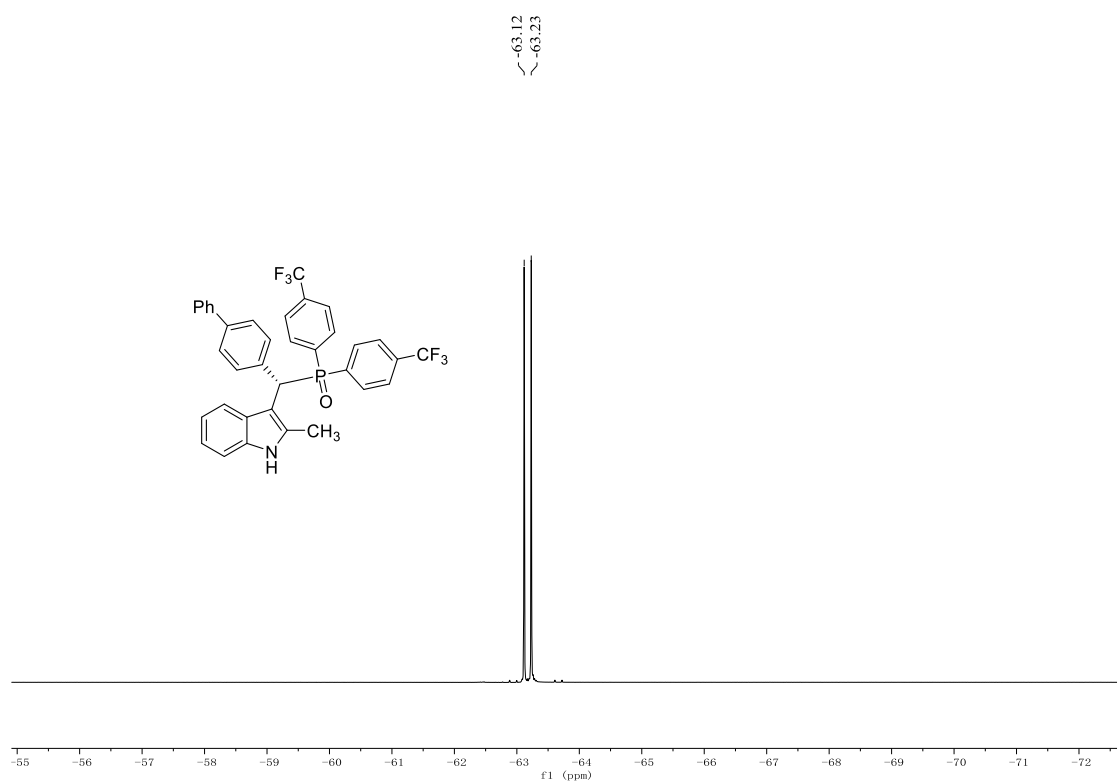

## HPLC spectra of 3n

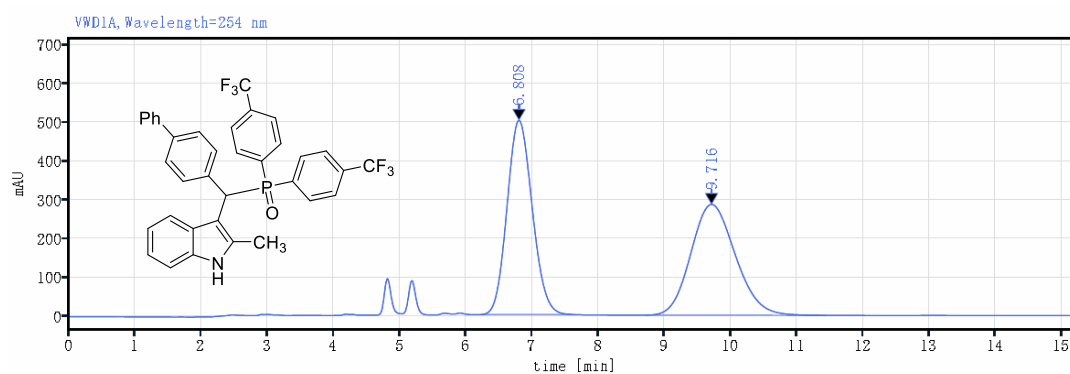

Detector VWD1A, Wavelength=254 nm

| Peak | Ret. Time [min] | Area     | Height | Area%  |
|------|-----------------|----------|--------|--------|
|      | 6.808           | 13183.75 | 499.39 | 49.78  |
|      | 9.716           | 13301.58 | 285.03 | 50.22  |
|      |                 | 26485.33 |        | 100.00 |

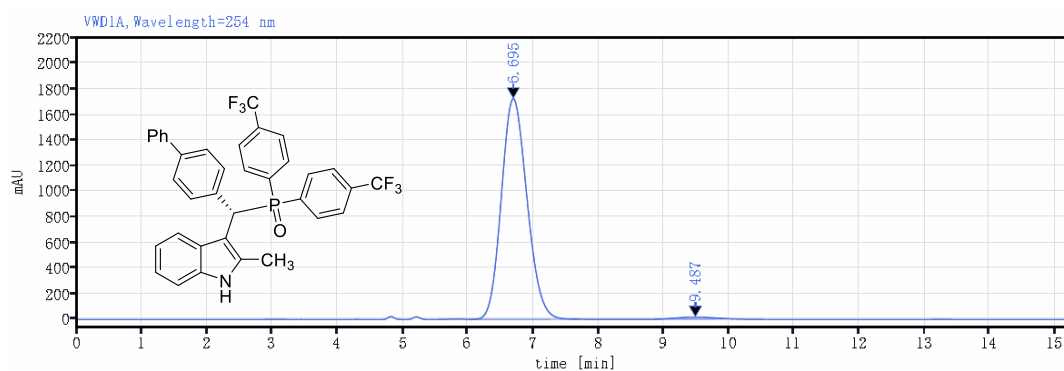

Detector VWD1A, Wavelength=254 nm

| Peak | Ret. Time [min] | Area     | Height  | Area%  |
|------|-----------------|----------|---------|--------|
|      | 6.695           | 47059.85 | 1722.33 | 98.67  |
|      | 9.487           | 632.90   | 16.23   | 1.33   |
|      |                 | 47692.75 |         | 100.00 |

**<sup>1</sup>H NMR spectrum of compound of 3o**

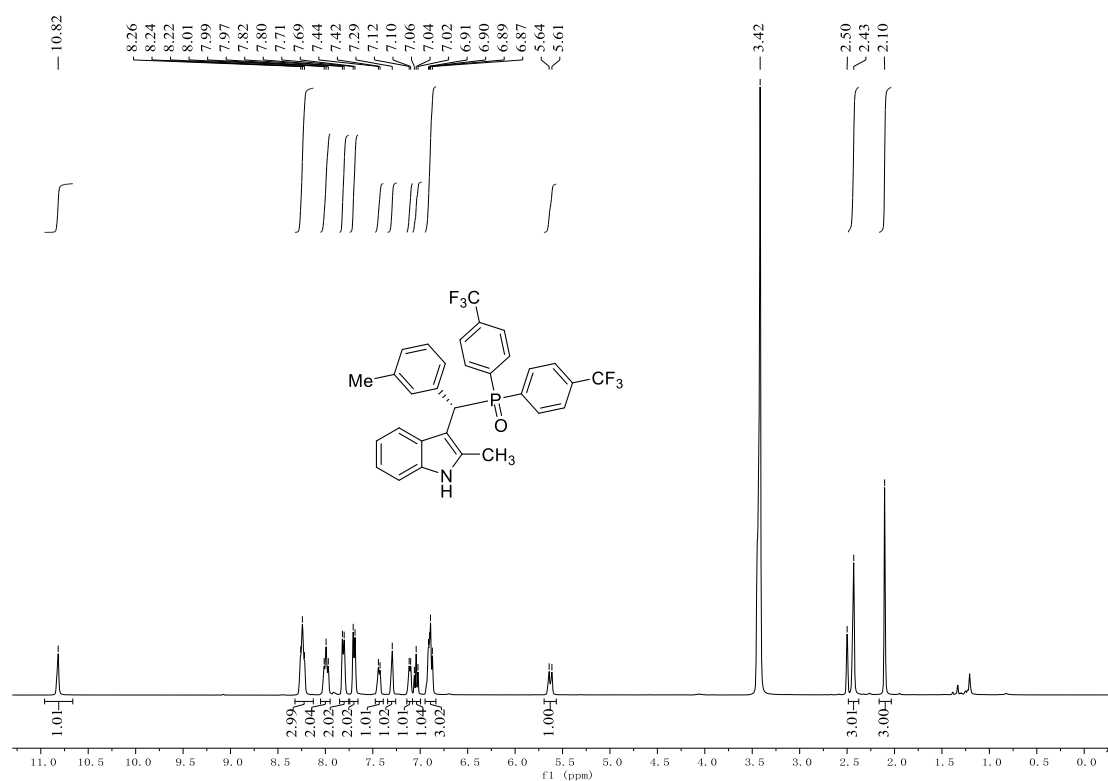

**<sup>13</sup>C NMR spectrum of compound of 3o**

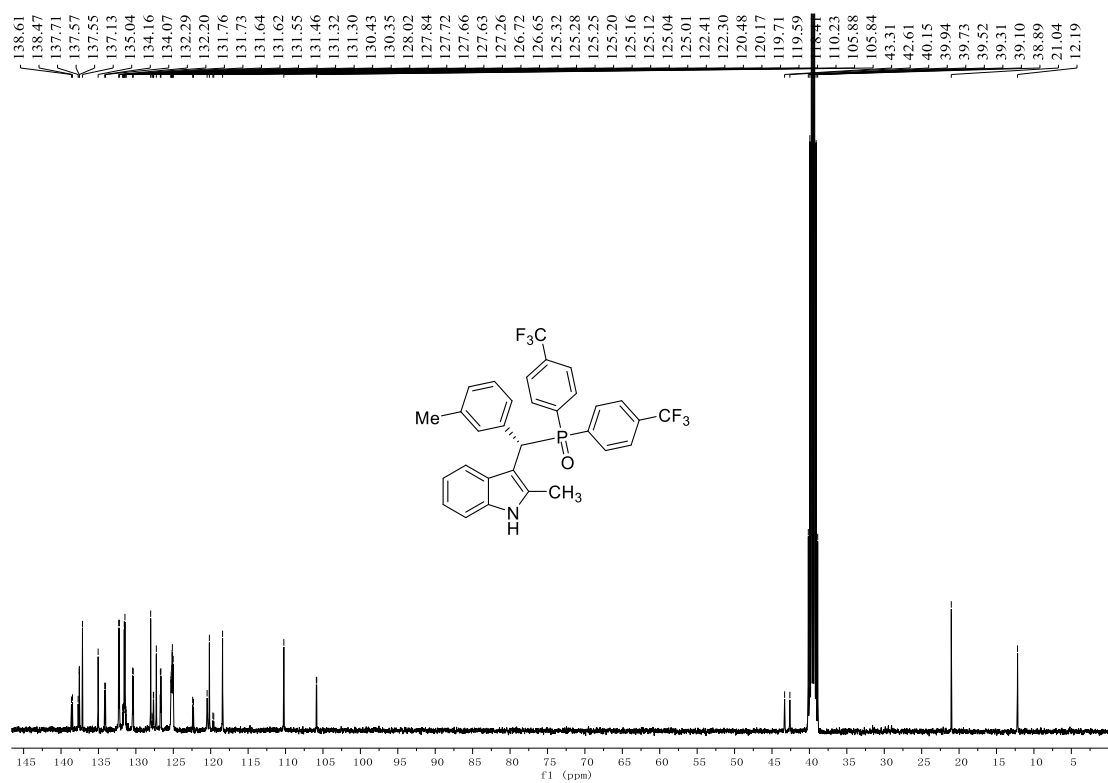

**$^{31}\text{P}$  NMR spectrum of compound of 3o**

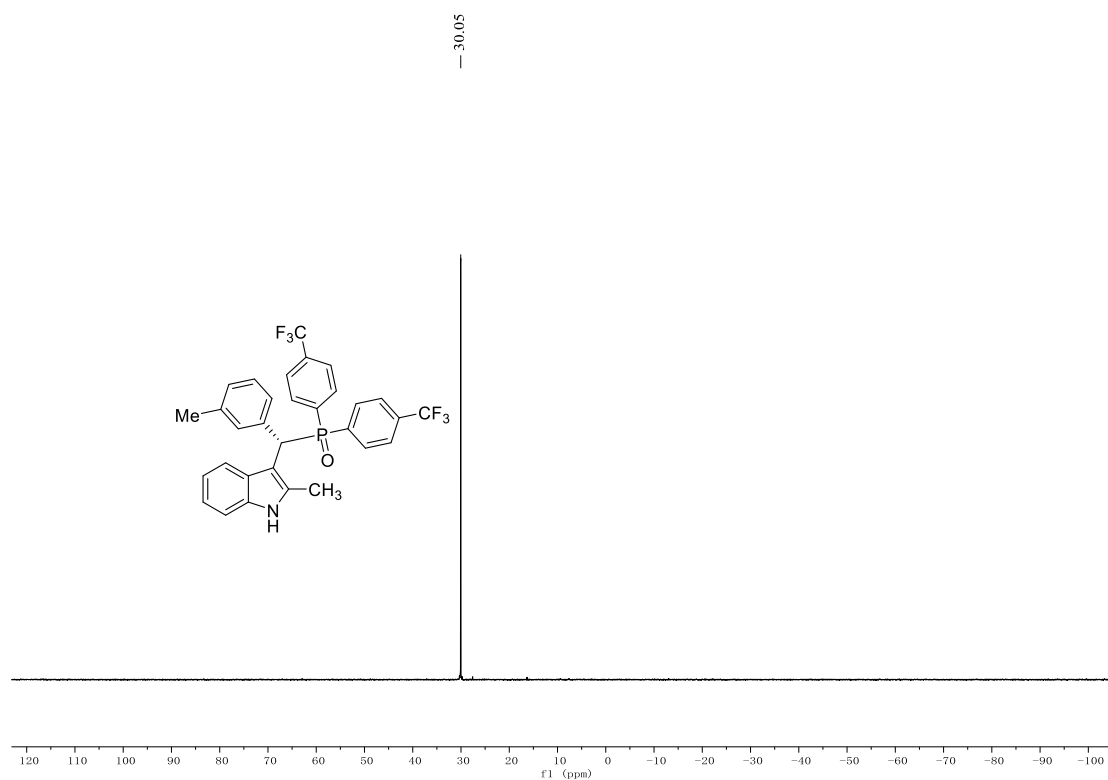

**$^{19}\text{F}$  NMR spectrum of compound of 3o**

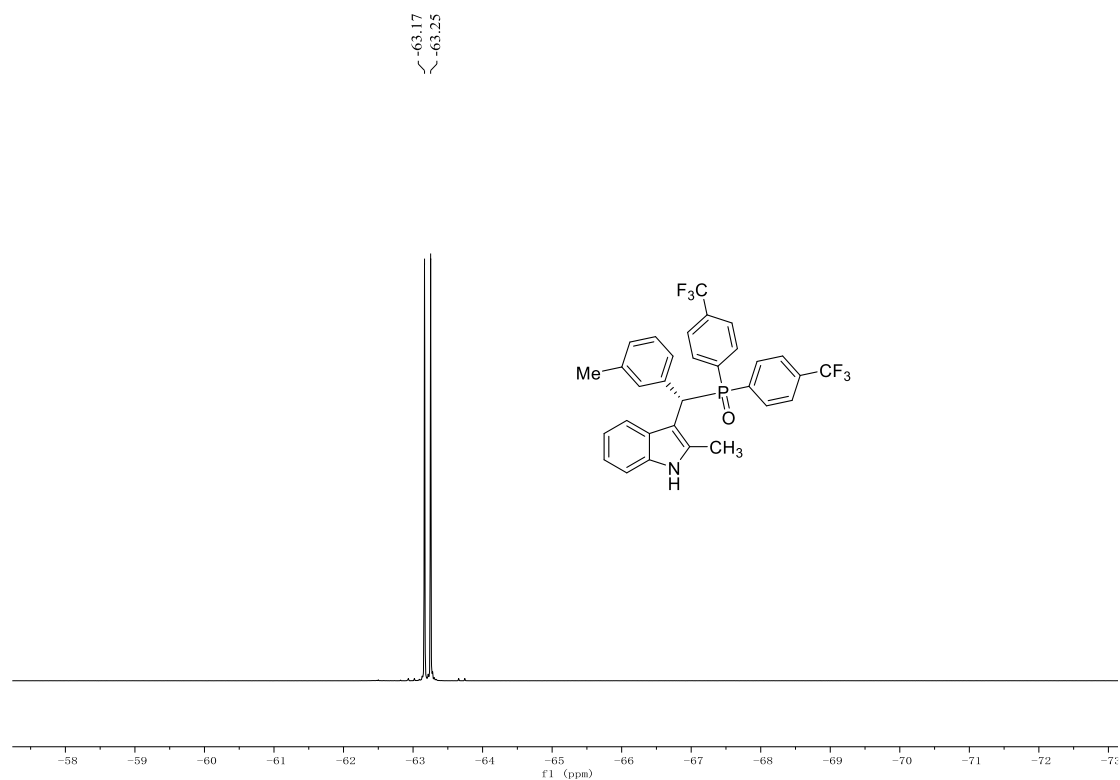

## HPLC spectra of 3o

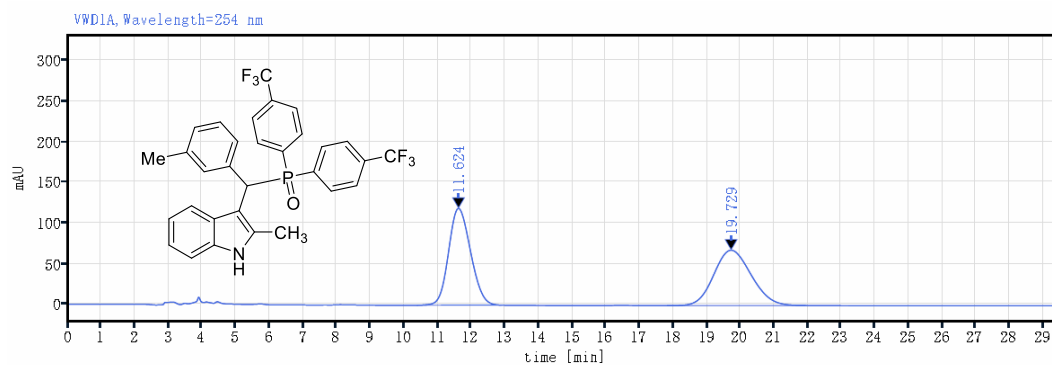

Detector VWD1A, Wavelength=254 nm

| Peak | Ret. Time [min] | Area     | Height | Area%  |
|------|-----------------|----------|--------|--------|
|      | 11.624          | 5403.46  | 119.20 | 50.71  |
|      | 19.729          | 5252.13  | 68.11  | 49.29  |
|      |                 | 10655.59 |        | 100.00 |

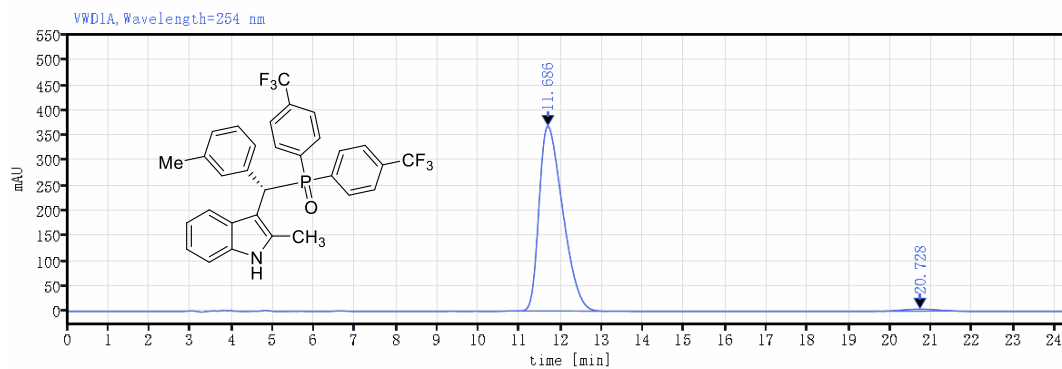

Detector VWD1A, Wavelength=254 nm

| Peak | Ret. Time [min] | Area     | Height | Area%  |
|------|-----------------|----------|--------|--------|
|      | 11.686          | 14648.85 | 367.70 | 98.46  |
|      | 20.728          | 229.82   | 3.99   | 1.54   |
|      |                 | 14878.67 |        | 100.00 |

**<sup>1</sup>H NMR spectrum of compound of 3p**

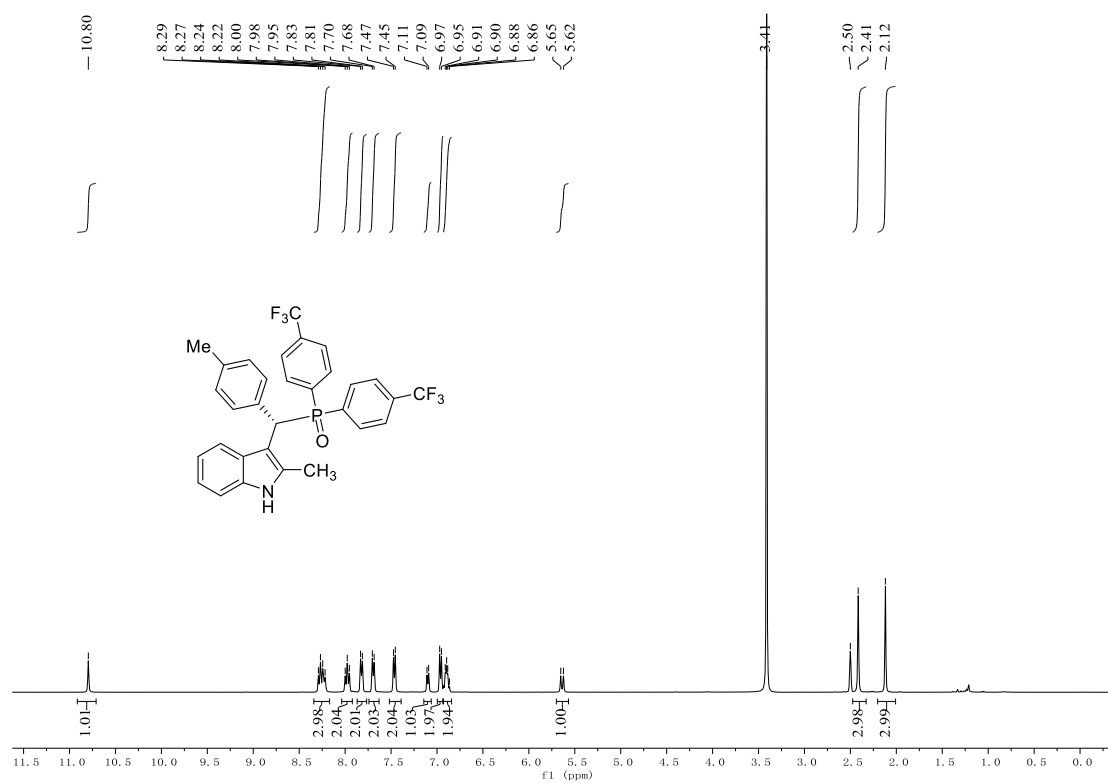

**<sup>13</sup>C NMR spectrum of compound of 3p**

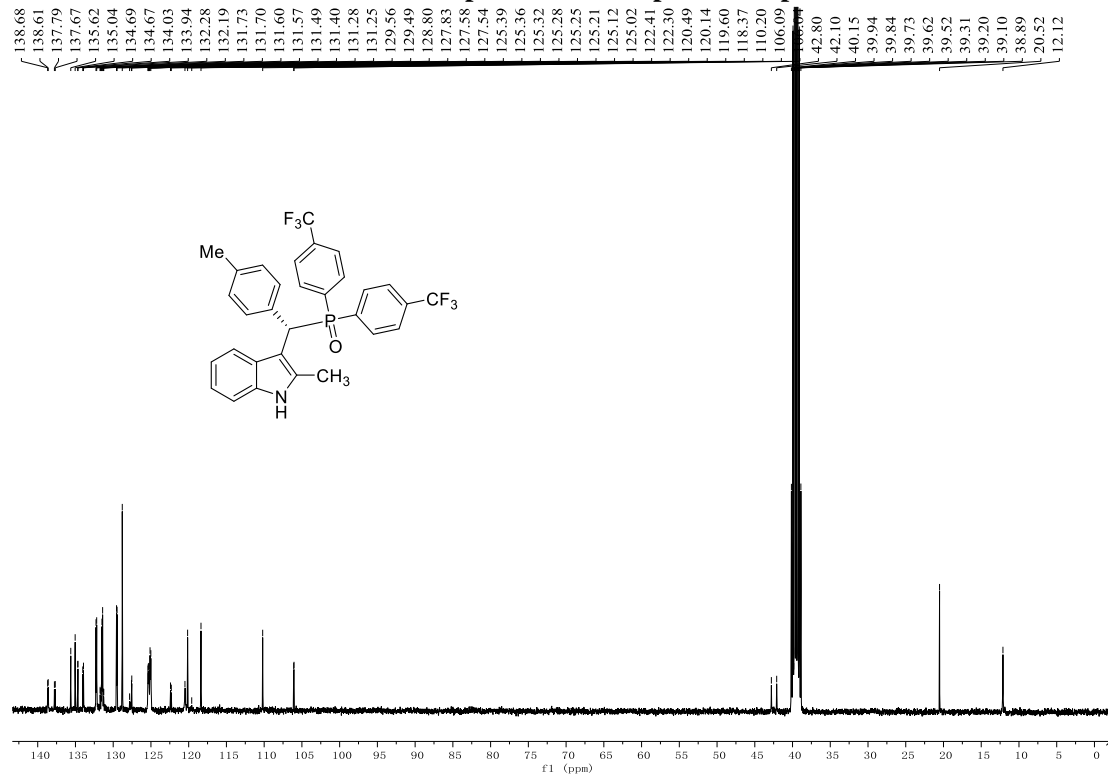

**<sup>31</sup>P NMR spectrum of compound of 3p**

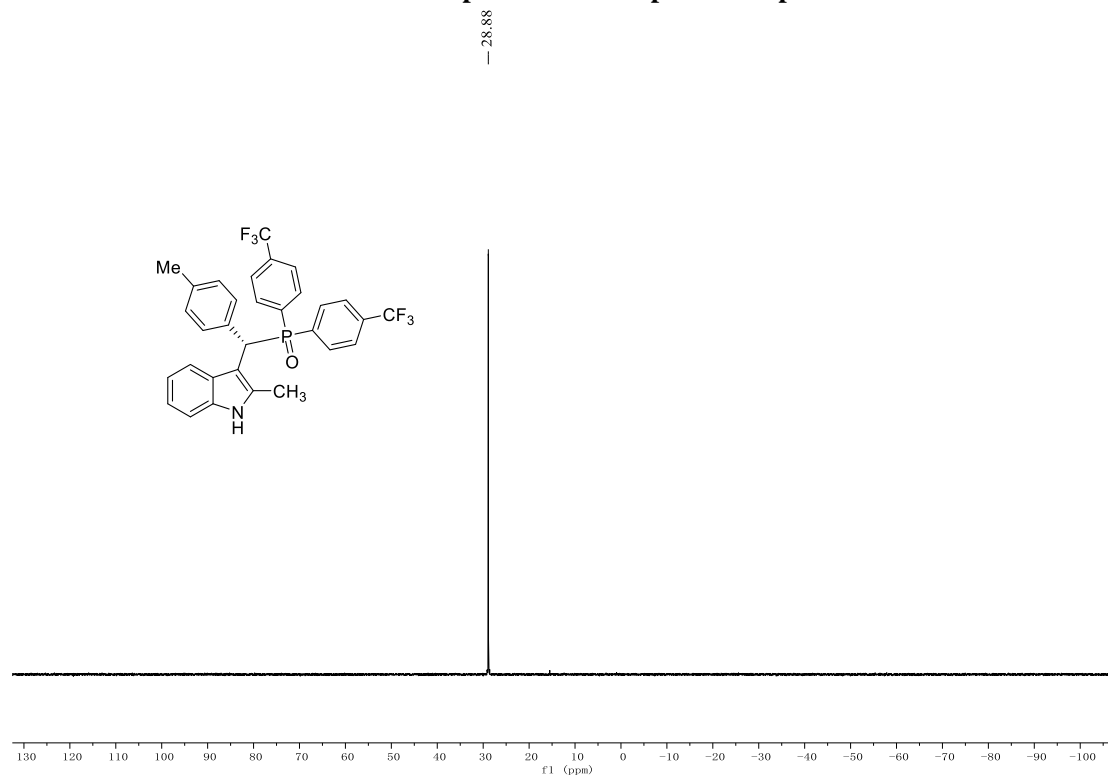

**<sup>19</sup>F NMR spectrum of compound of 3p**

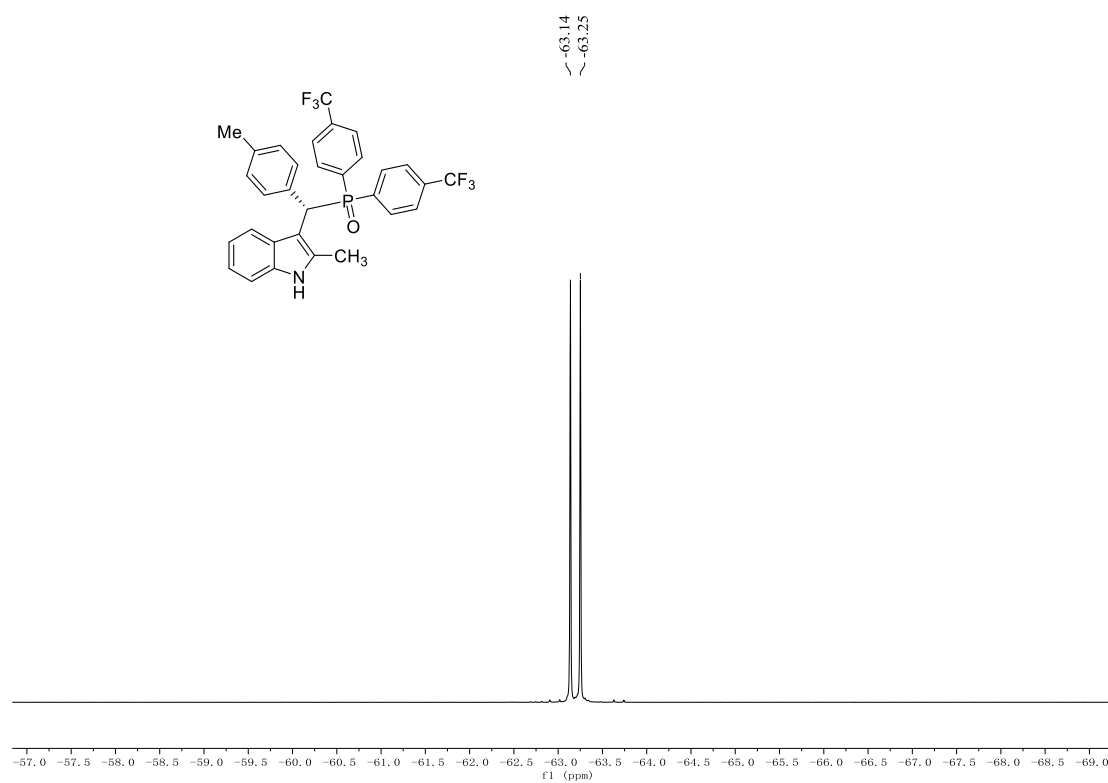



## HPLC spectra of 3p

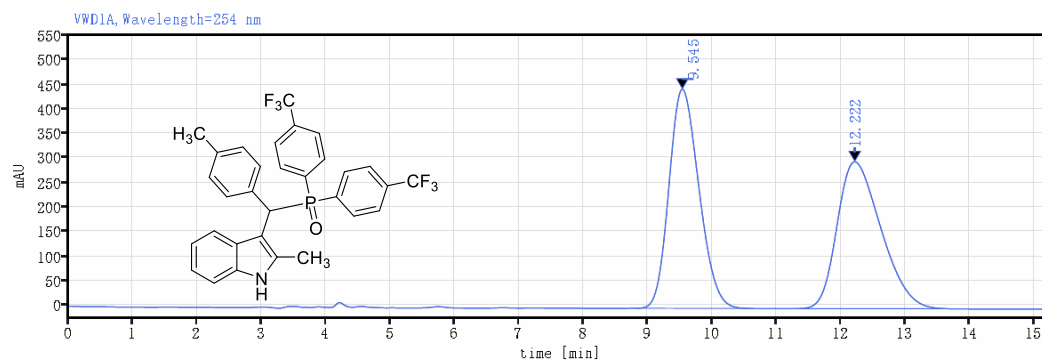

Detector VWD1A, Wavelength=254 nm

| Peak | Ret.Time [min] | Area     | Height | Area%  |
|------|----------------|----------|--------|--------|
|      | 9.545          | 14407.21 | 445.97 | 50.54  |
|      | 12.222         | 14101.83 | 298.79 | 49.46  |
|      |                | 28509.04 |        | 100.00 |

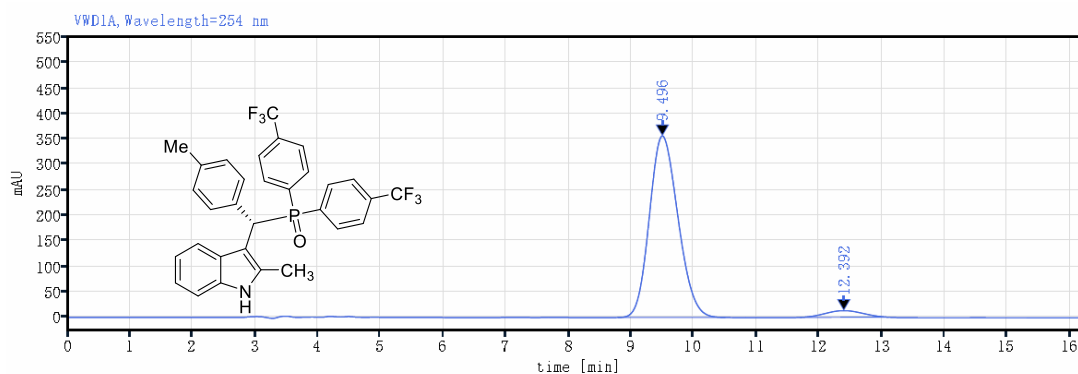

Detector VWD1A, Wavelength=254 nm

| Peak | Ret.Time [min] | Area     | Height | Area%  |
|------|----------------|----------|--------|--------|
|      | 9.496          | 11307.76 | 356.38 | 95.44  |
|      | 12.392         | 540.65   | 13.08  | 4.56   |
|      |                | 11848.42 |        | 100.00 |

# <sup>1</sup>H NMR spectrum of compound of 3q

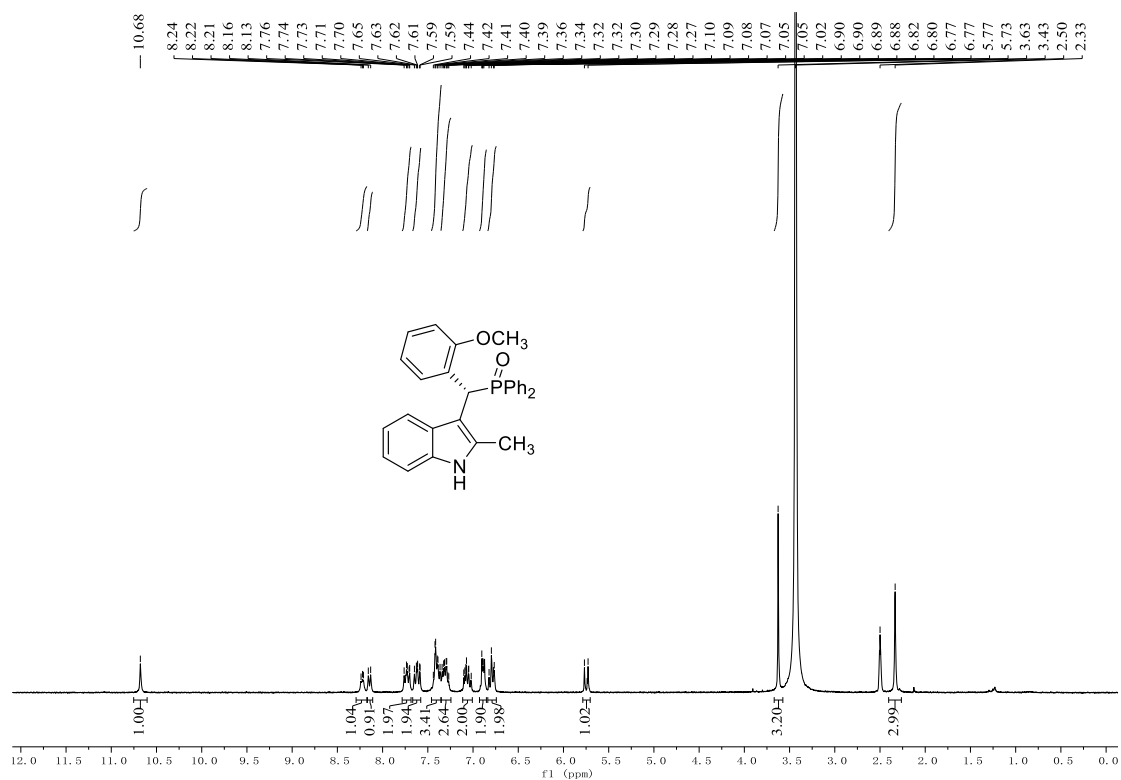

# <sup>13</sup>C NMR spectrum of compound of 3q

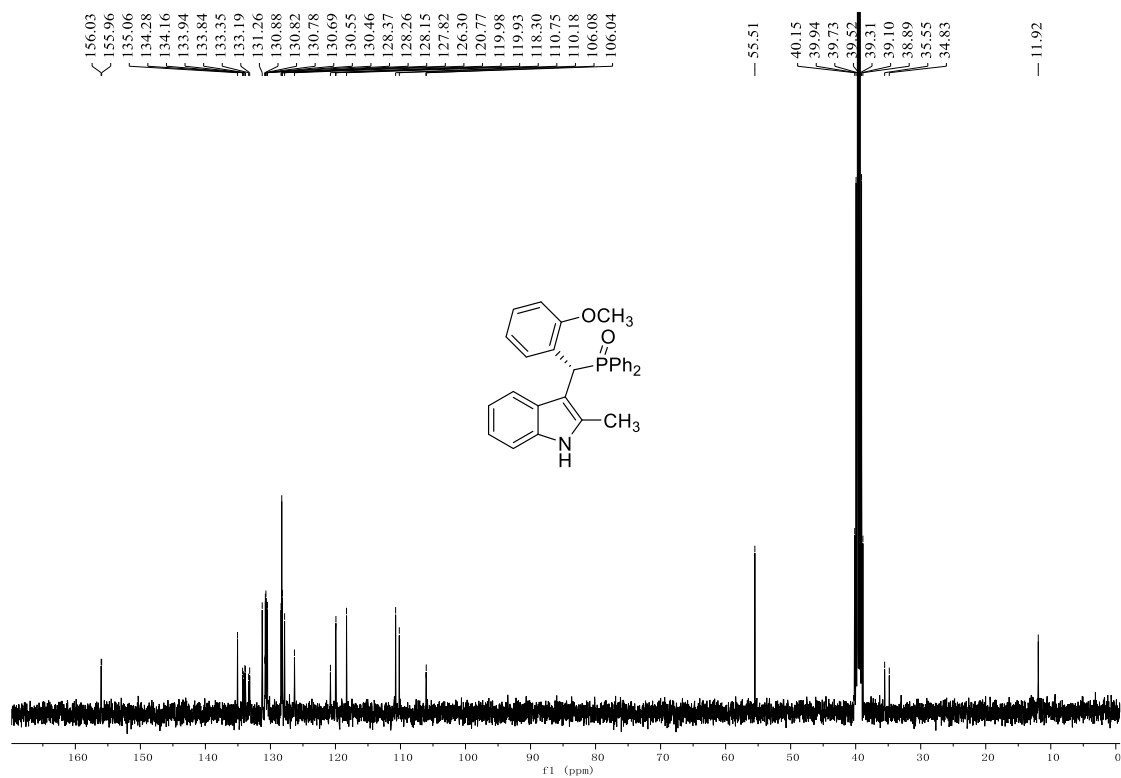

**$^{31}\text{P}$  NMR spectrum of compound of 3q**

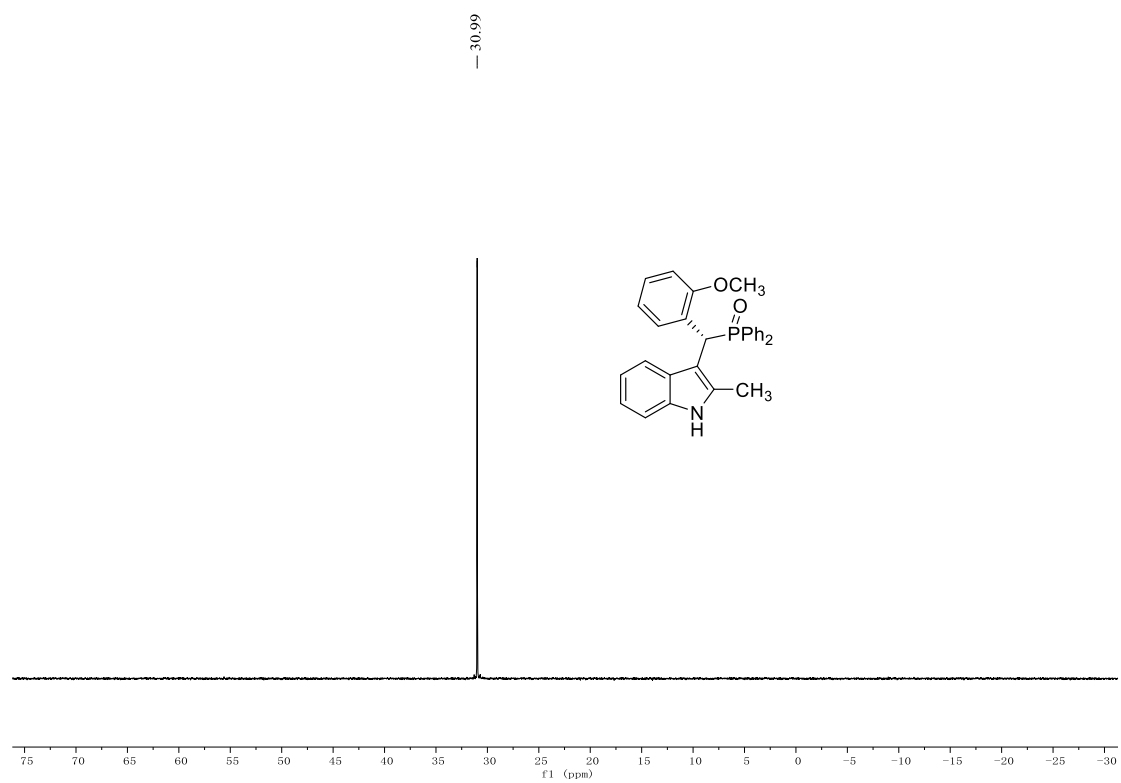

# HPLC spectra of 3q

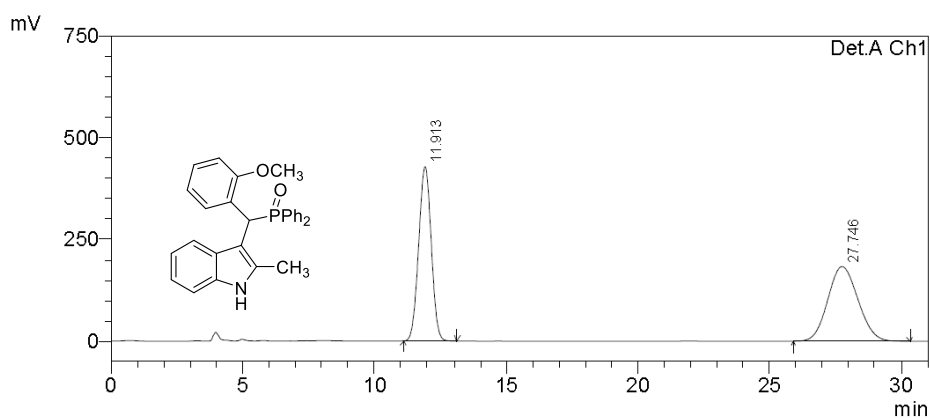

1 Det.A Ch1/254nm

PeakTable

Detector A Ch1 254nm

| Peak# | Ret. Time | Area     | Height | Area %  |
|-------|-----------|----------|--------|---------|
| 1     | 11.913    | 14245037 | 428304 | 49.435  |
| 2     | 27.746    | 14570404 | 183101 | 50.565  |
| Total |           | 28815440 |        | 100.000 |

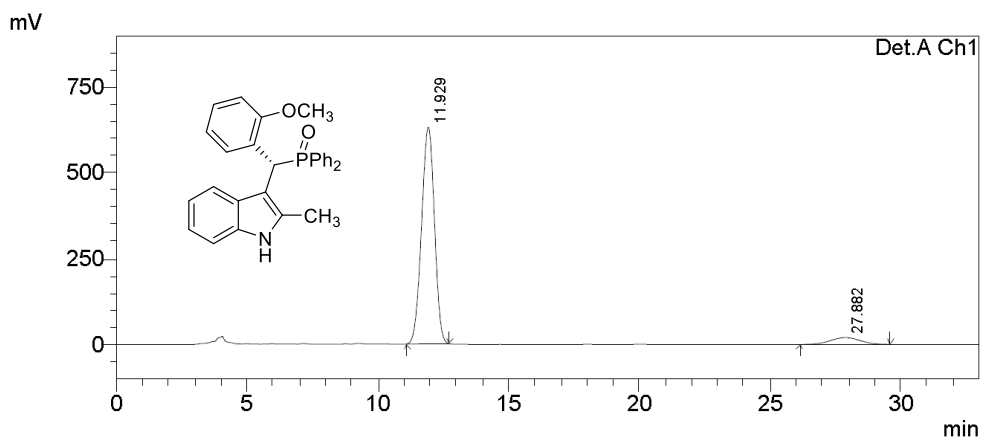

1 Det.A Ch1/254nm

PeakTable

Detector A Ch1 254nm

| Peak# | Ret. Time | Area     | Height | Area %  |
|-------|-----------|----------|--------|---------|
| 1     | 11.929    | 21612526 | 630238 | 93.245  |
| 2     | 27.882    | 1565803  | 19847  | 6.755   |
| Total |           | 23178329 |        | 100.000 |

**<sup>1</sup>H NMR spectrum of compound of 3r**

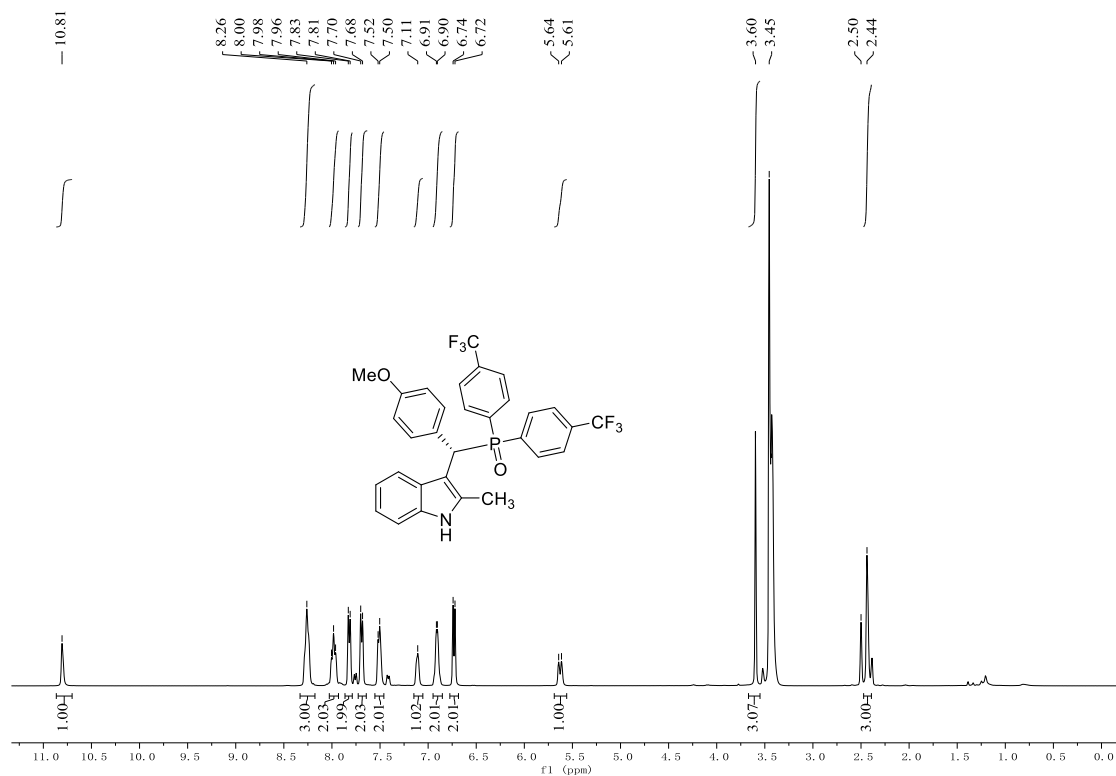

**<sup>13</sup>C NMR spectrum of compound of 3r**

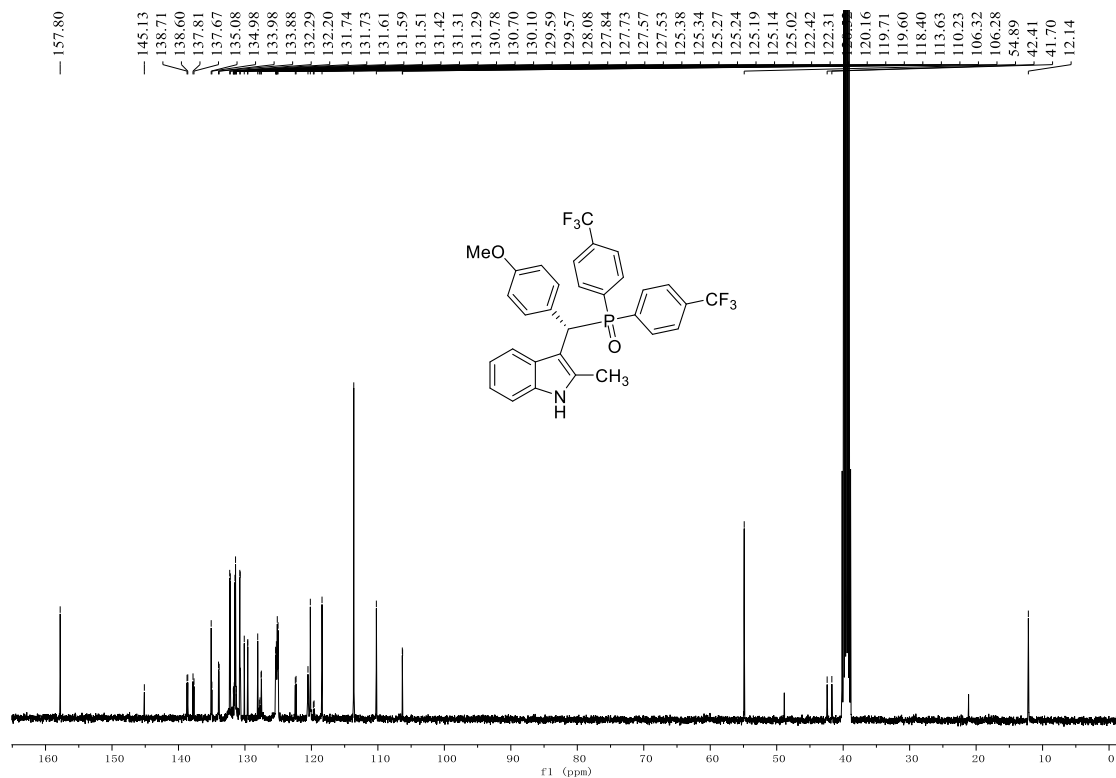

**$^{31}\text{P}$  NMR spectrum of compound of 3r**

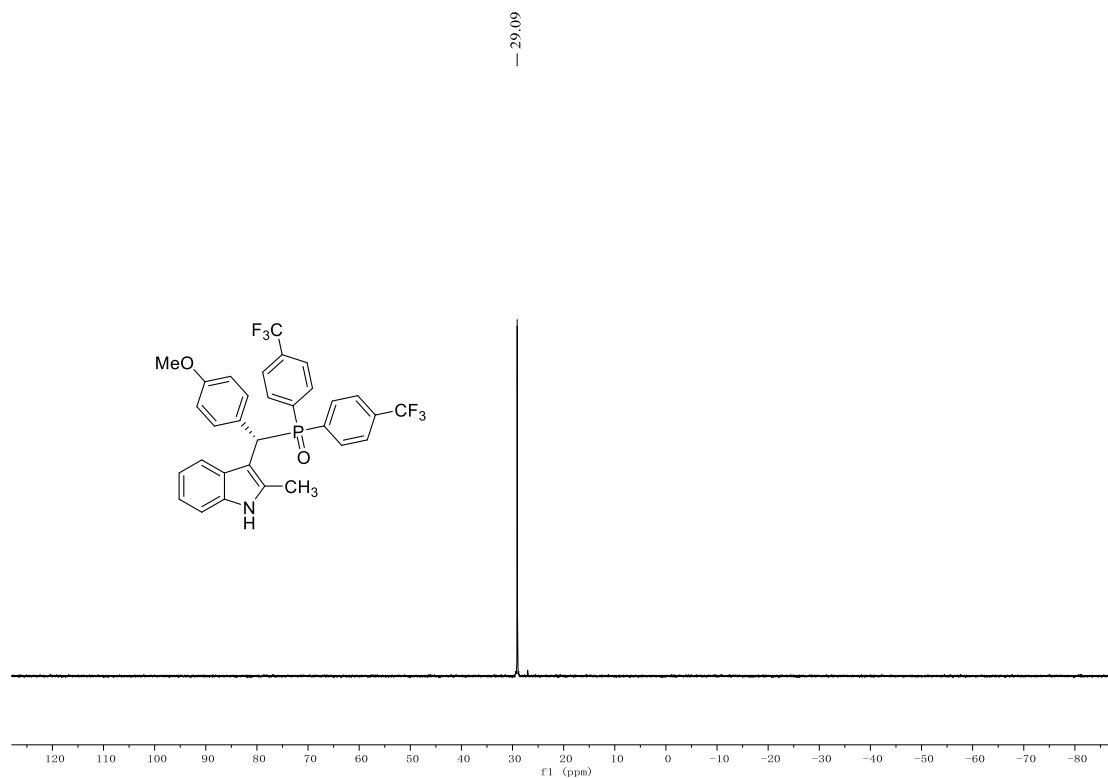

**$^{19}\text{F}$  NMR spectrum of compound of 3r**

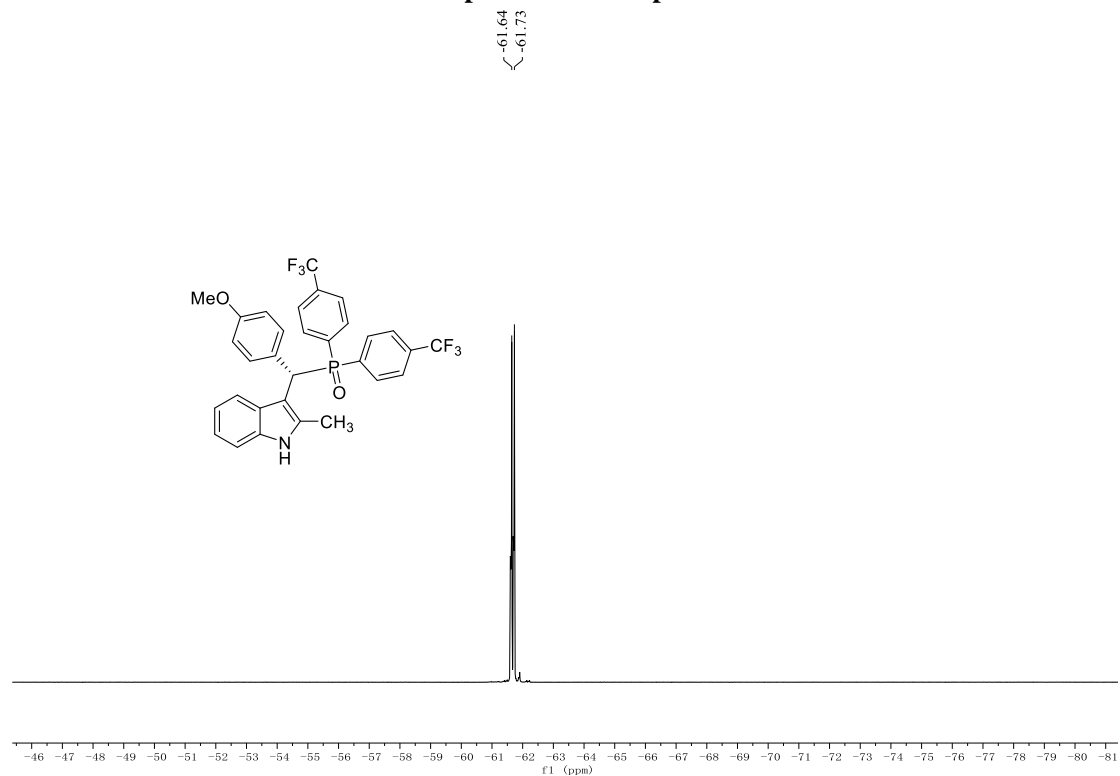

## HPLC spectra of 3r

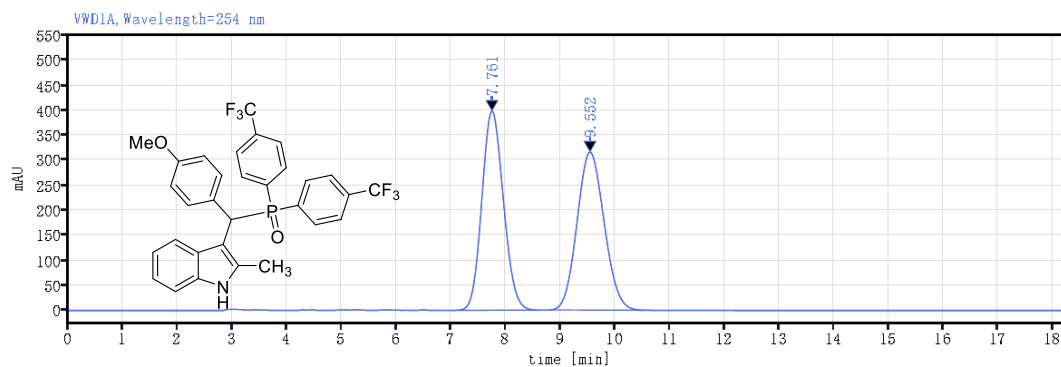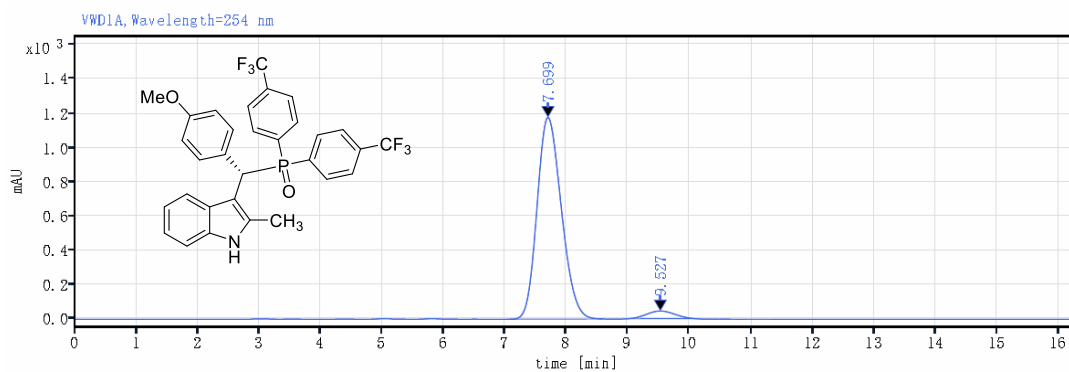

Detector VWD1A, Wavelength=254 nm

| Peak | Ret. Time [min] | Area     | Height  | Area%  |
|------|-----------------|----------|---------|--------|
|      | 7.699           | 32252.72 | 1175.43 | 95.70  |
|      | 9.527           | 1447.55  | 45.13   | 4.30   |
|      |                 | 33700.27 |         | 100.00 |

**<sup>1</sup>H NMR spectrum of compound of 3s**

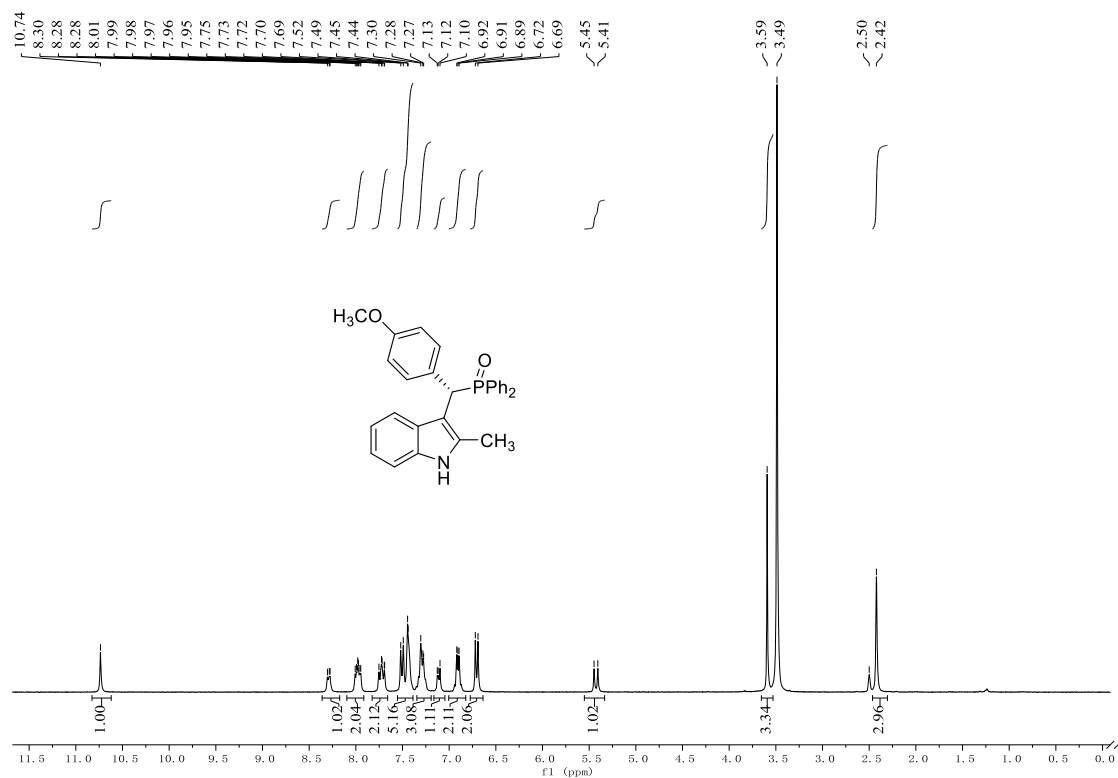

**<sup>13</sup>C NMR spectrum of compound of 3s**

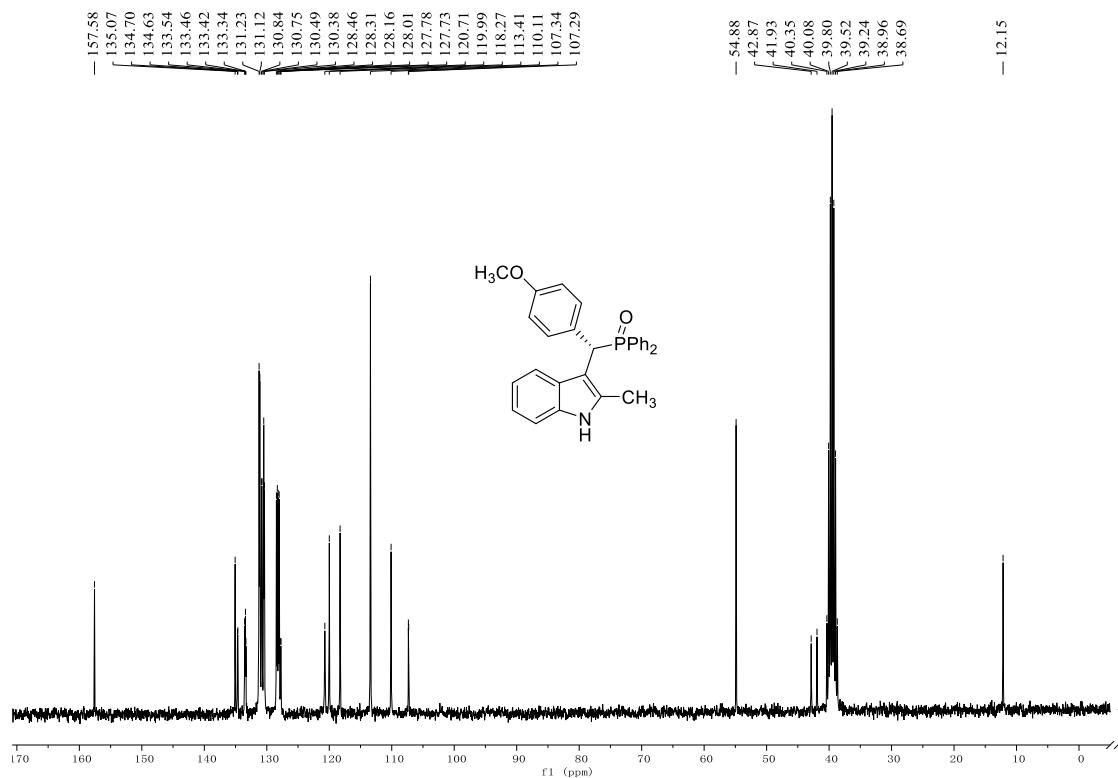



**$^{31}\text{P}$  NMR spectrum of compound of 3s**

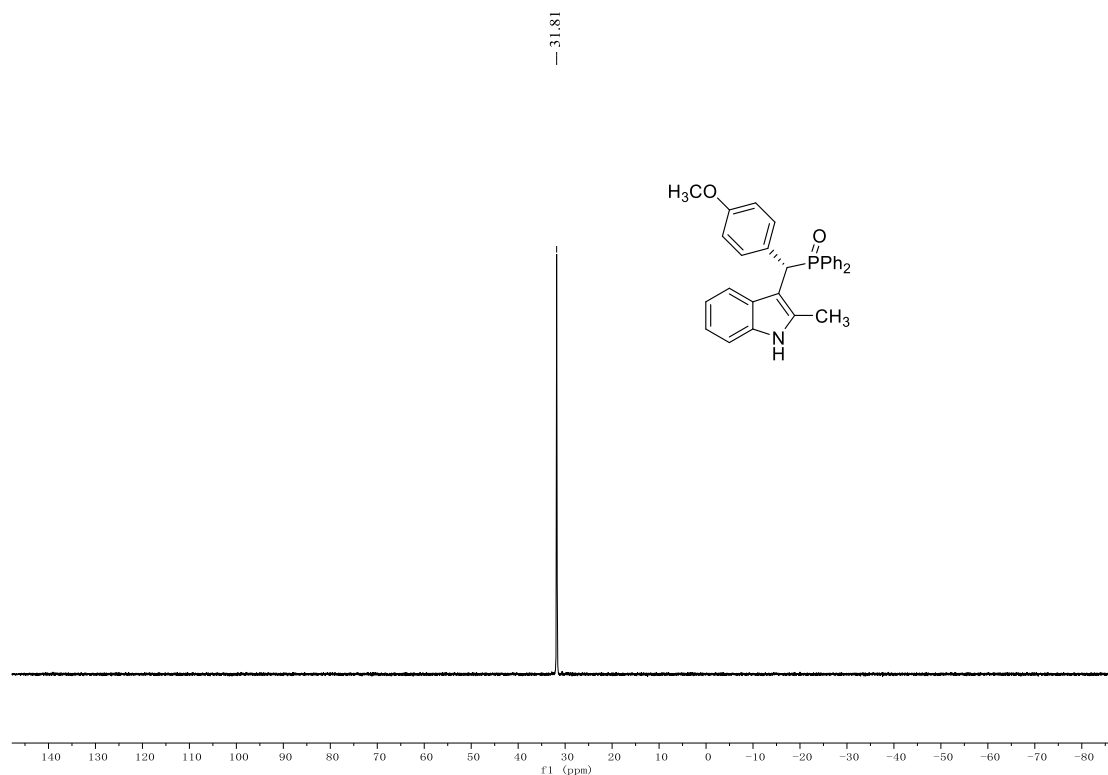

# HPLC spectra of 3s

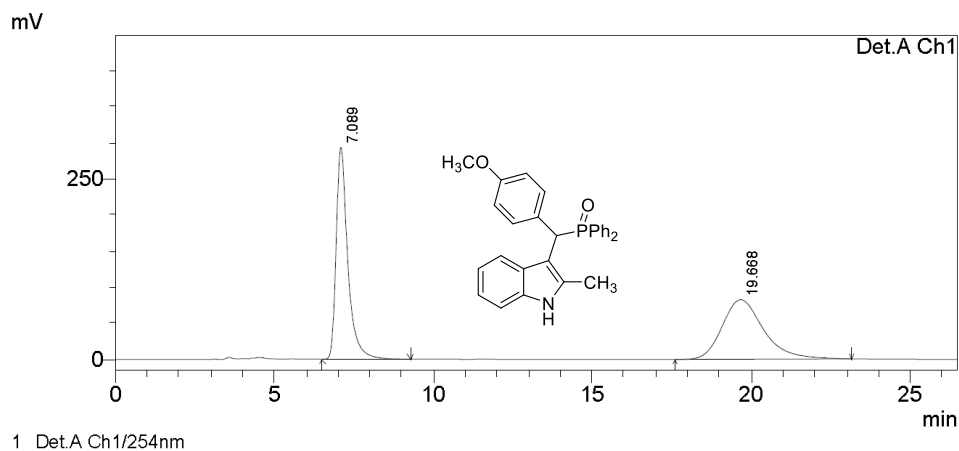

PeakTable

Detector A Ch1 254nm

| Peak# | Ret. Time | Area     | Height | Area %  |
|-------|-----------|----------|--------|---------|
| 1     | 7.089     | 7441200  | 293311 | 50.058  |
| 2     | 19.668    | 7423923  | 82279  | 49.942  |
| Total |           | 14865122 |        | 100.000 |

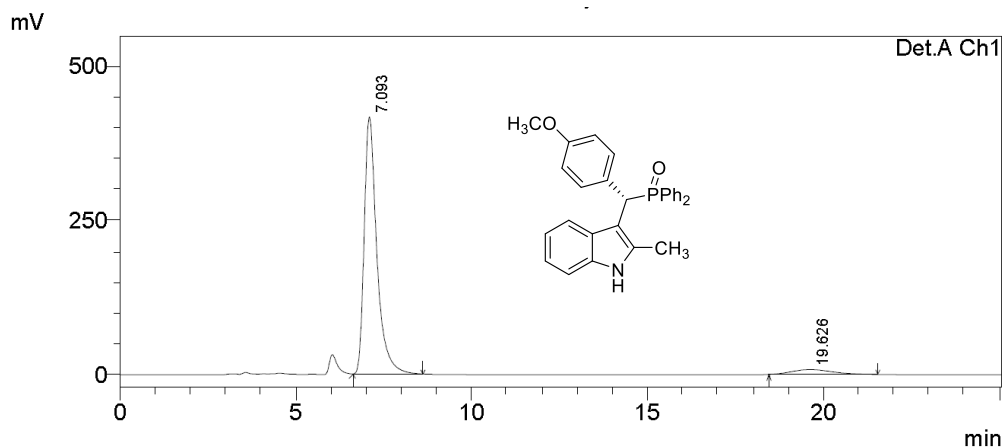

PeakTable

Detector A Ch1 254nm

| Peak# | Ret. Time | Area     | Height | Area %  |
|-------|-----------|----------|--------|---------|
| 1     | 7.093     | 10407014 | 416400 | 94.197  |
| 2     | 19.626    | 641132   | 7943   | 5.803   |
| Total |           | 11048146 |        | 100.000 |

# <sup>1</sup>H NMR spectrum of compound of 3t

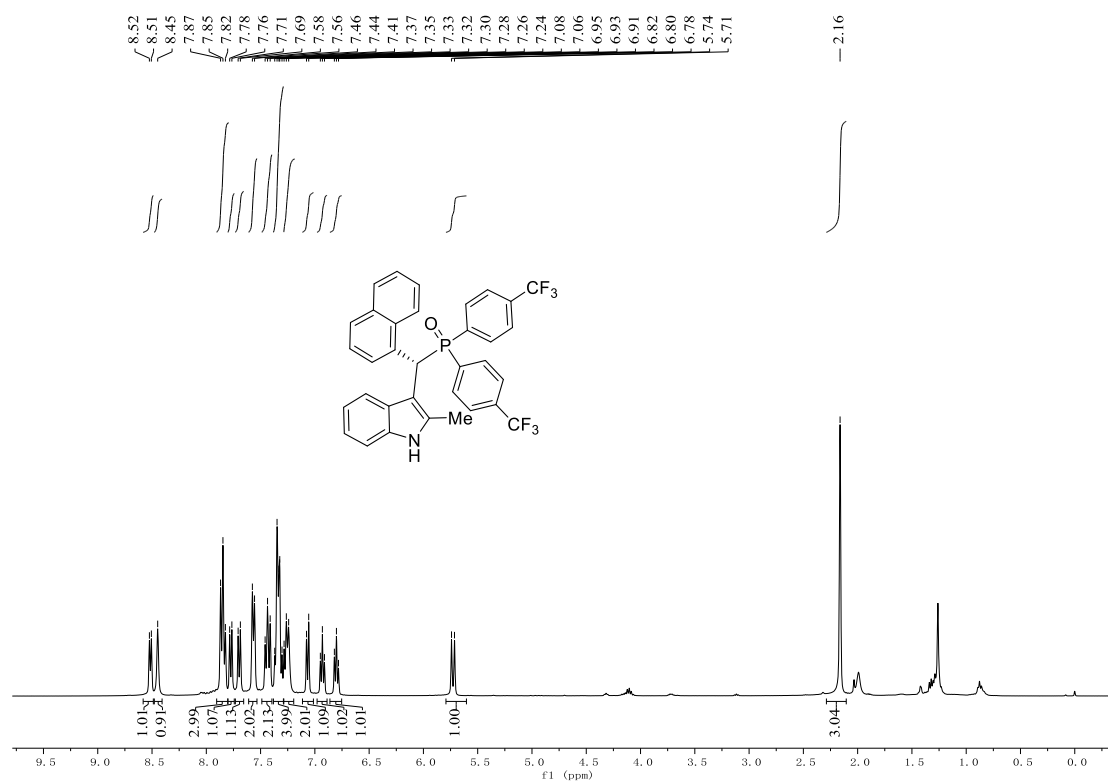

# <sup>13</sup>C NMR spectrum of compound of 3t

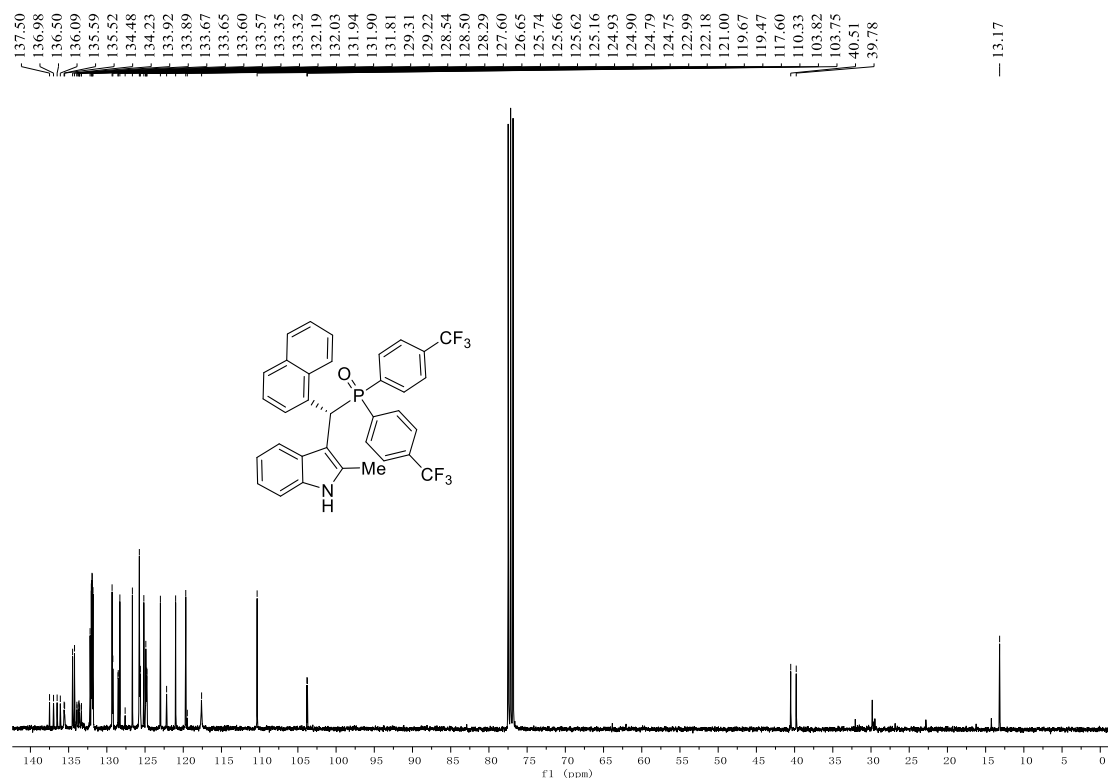

**<sup>31</sup>P NMR spectrum of compound of 3t**

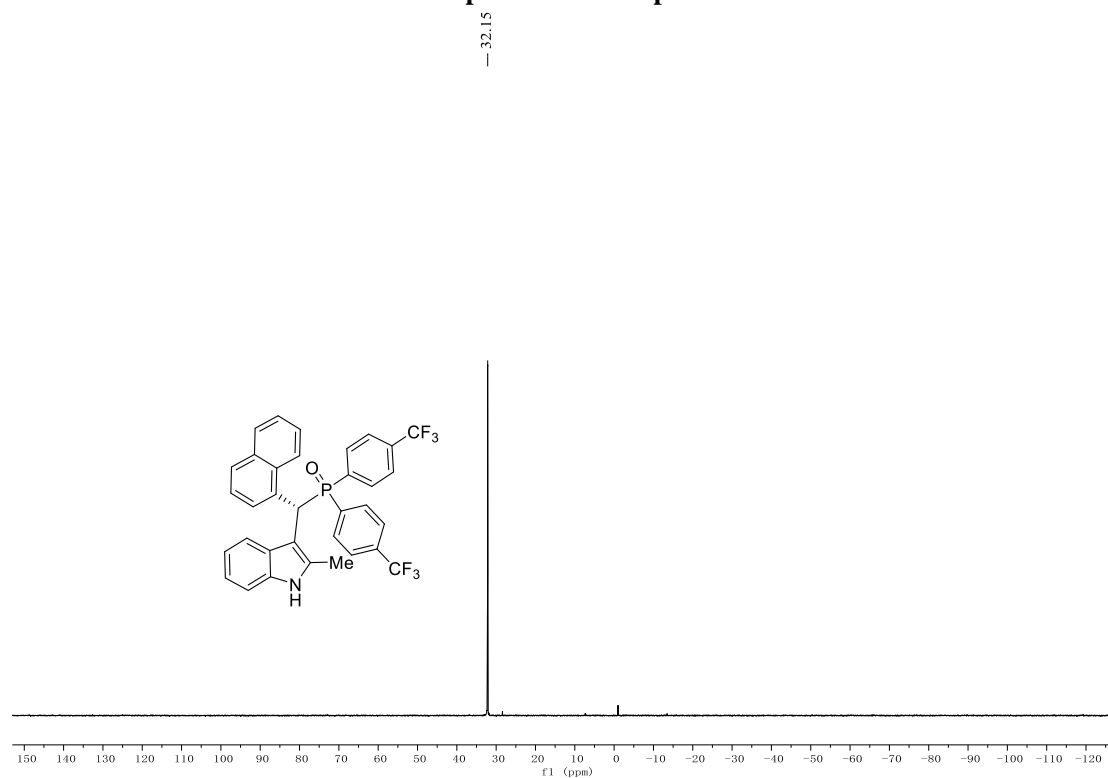

**<sup>19</sup>F NMR spectrum of compound of 3t**

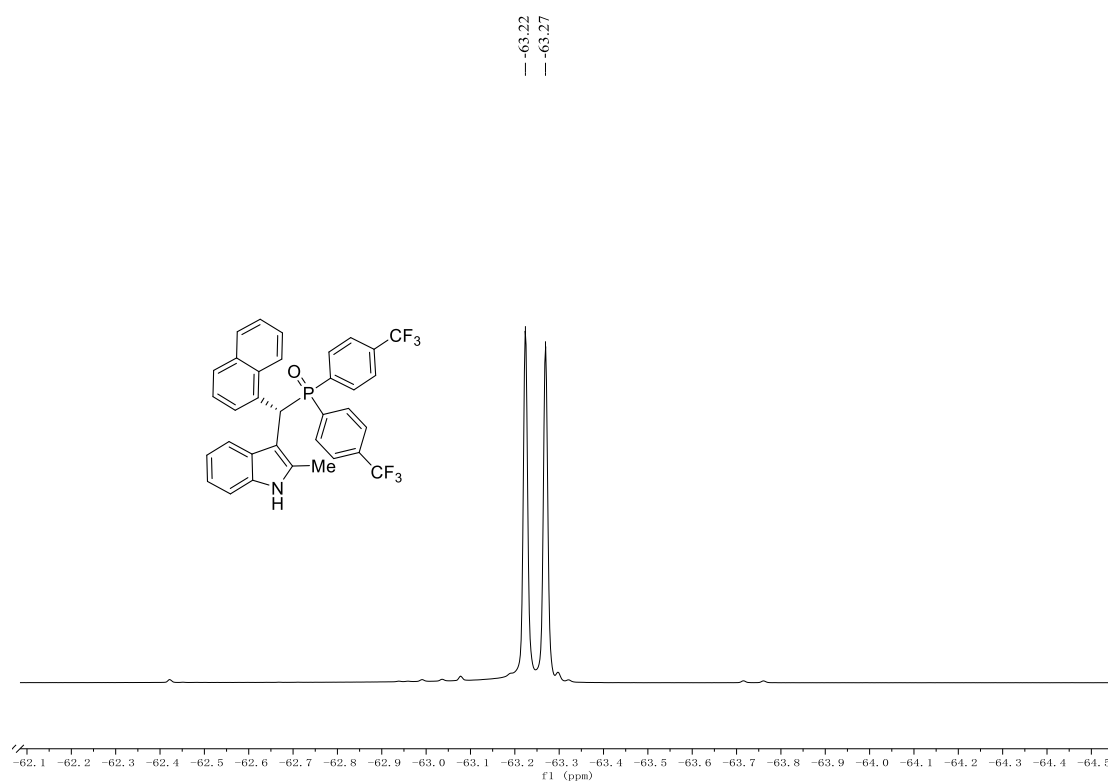

# HPLC spectra of 3t

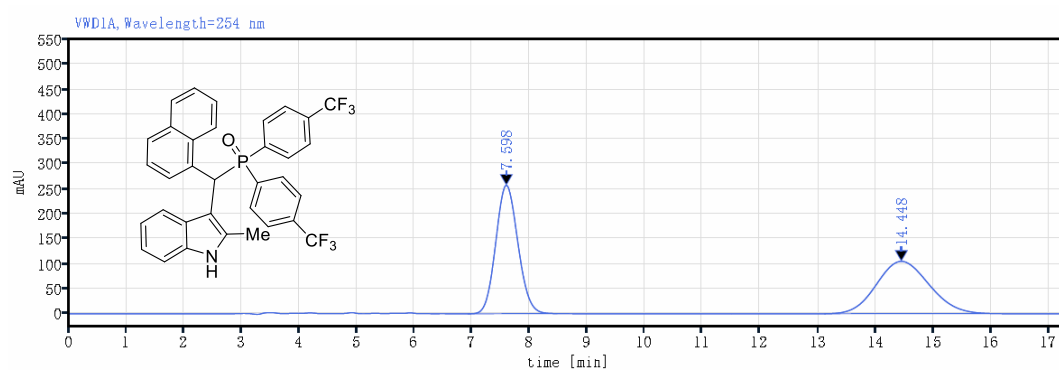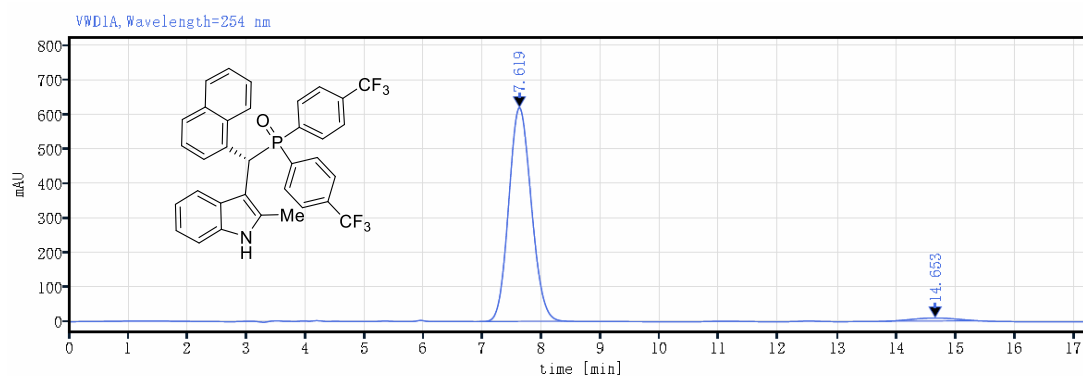

Detector VWD1A, Wavelength=254 nm

| Peak | Ret. Time [min] | Area     | Height | Area%  |
|------|-----------------|----------|--------|--------|
|      | 7.619           | 16455.83 | 621.14 | 97.33  |
|      | 14.653          | 451.82   | 8.71   | 2.67   |
|      |                 | 16907.65 |        | 100.00 |

**<sup>1</sup>H NMR spectrum of compound of 3u**

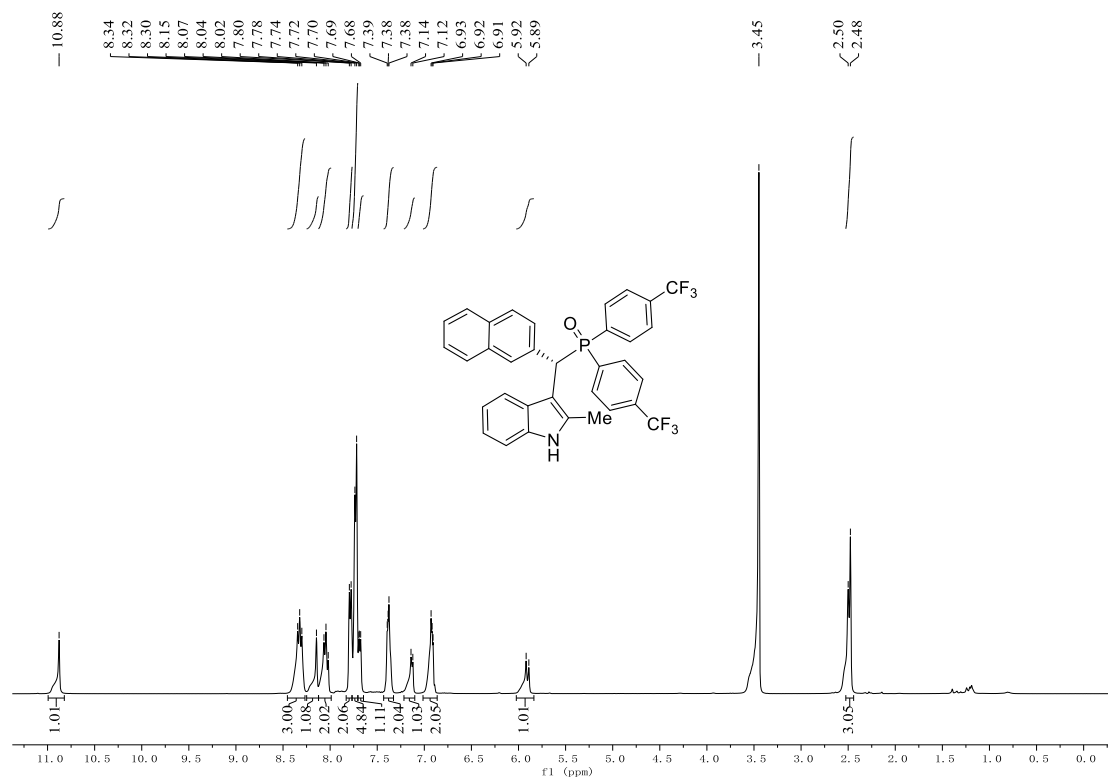

**<sup>13</sup>C NMR spectrum of compound of 3u**

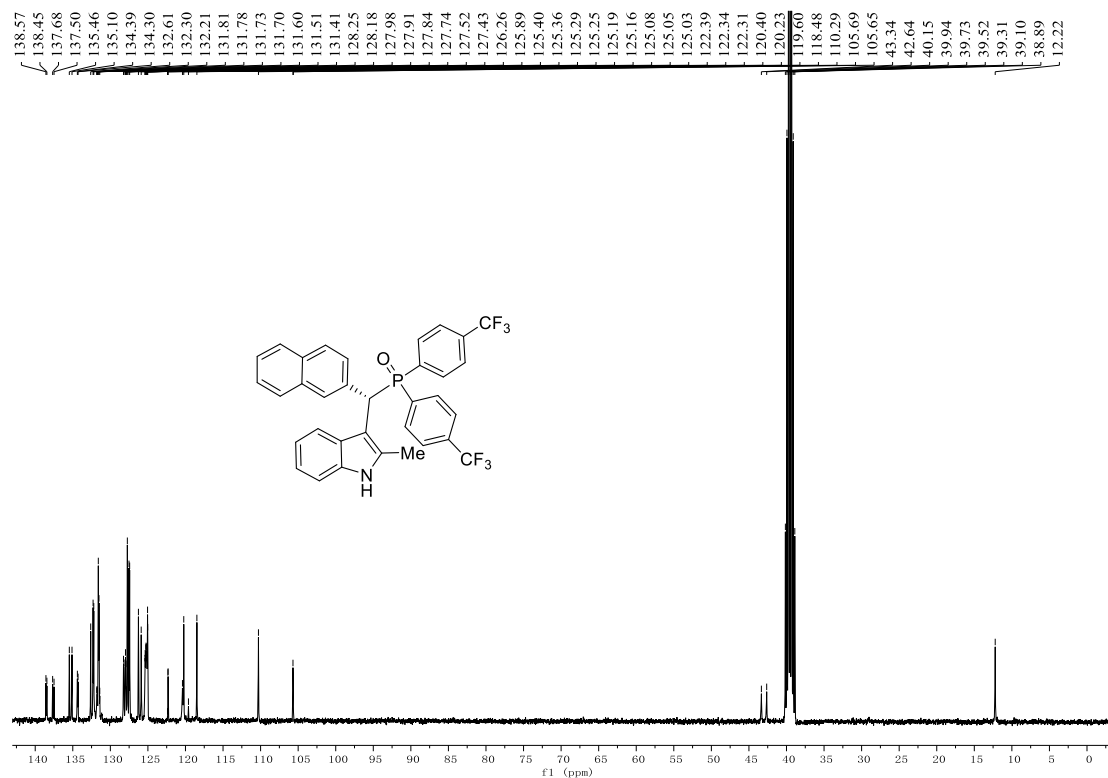

**$^{31}\text{P}$  NMR spectrum of compound of 3u**

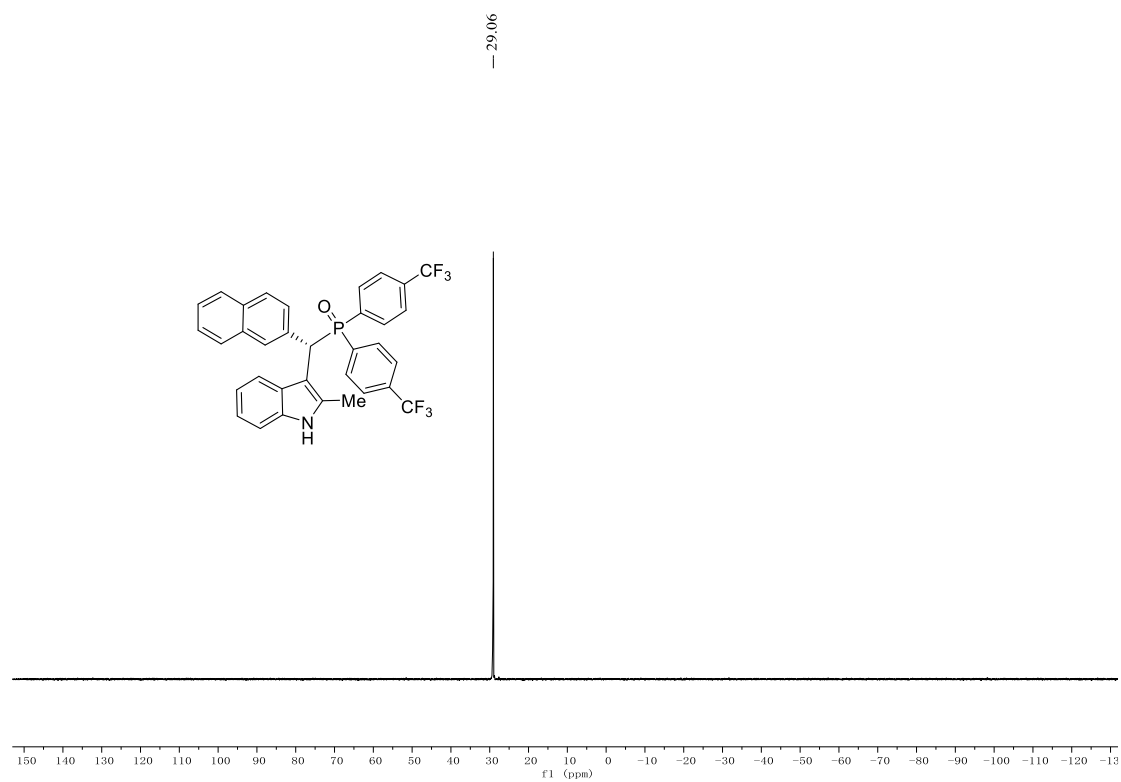

**$^{19}\text{F}$  NMR spectrum of compound of 3u**

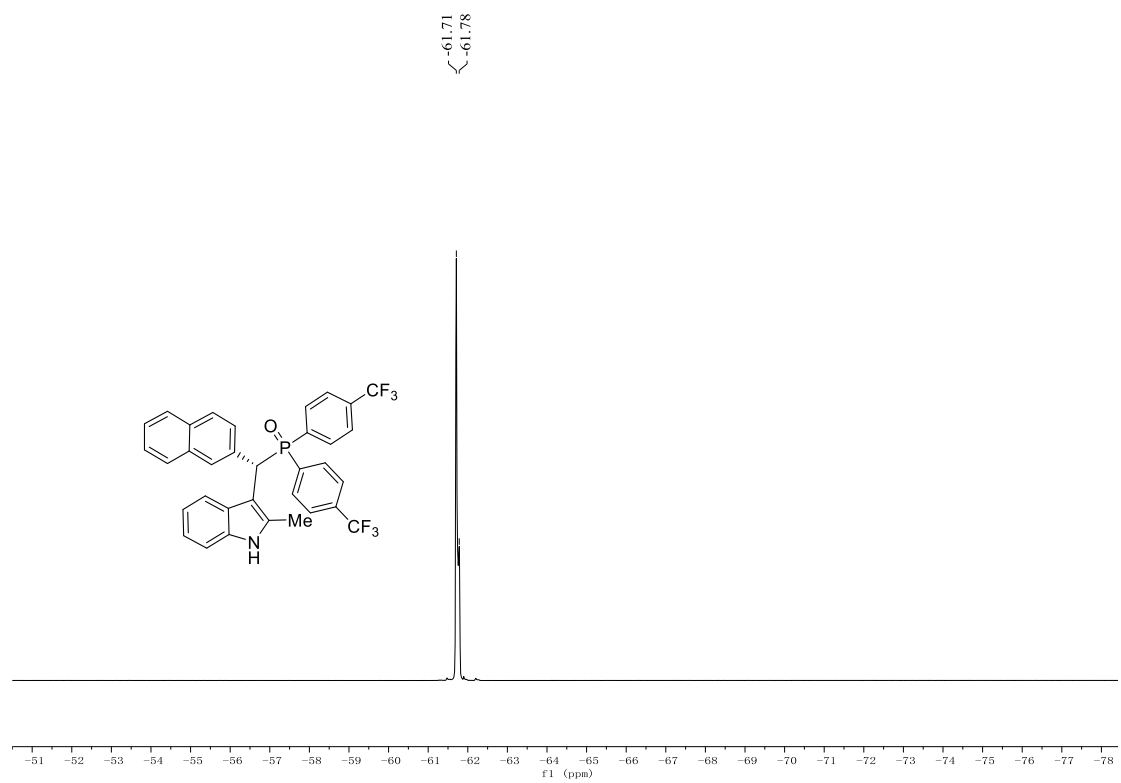

## HPLC spectra of 3u

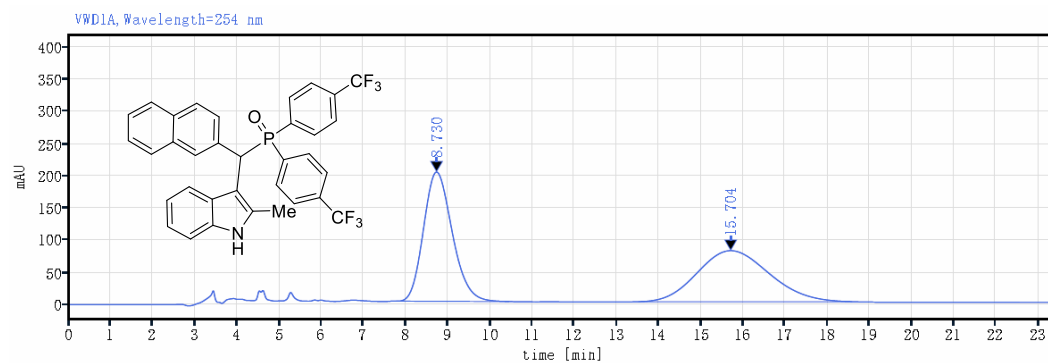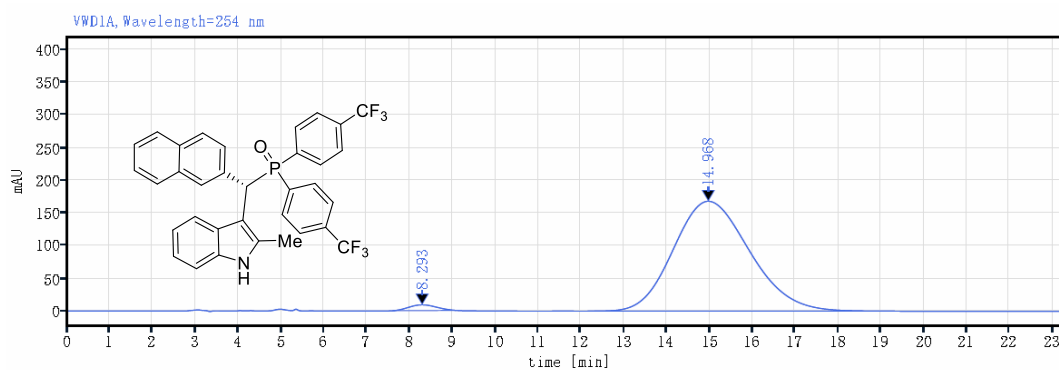

**Detector** VWD1A, Wavelength=254 nm

| Peak | Ret. Time [min] | Area     | Height | Area%  |
|------|-----------------|----------|--------|--------|
|      | 8.293           | 396.18   | 8.84   | 1.87   |
|      | 14.968          | 20748.20 | 168.06 | 98.13  |
|      |                 | 21144.39 |        | 100.00 |



**<sup>1</sup>H NMR spectrum of compound of 3v**

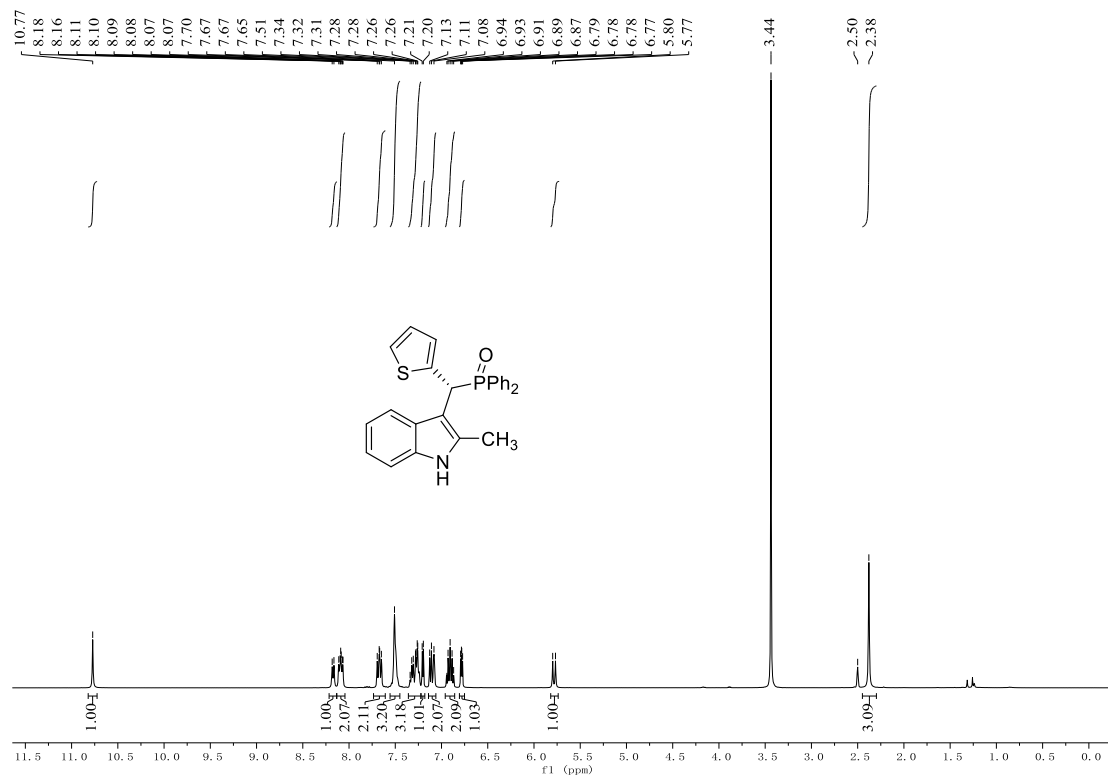

**<sup>13</sup>C NMR spectrum of compound of 3v**

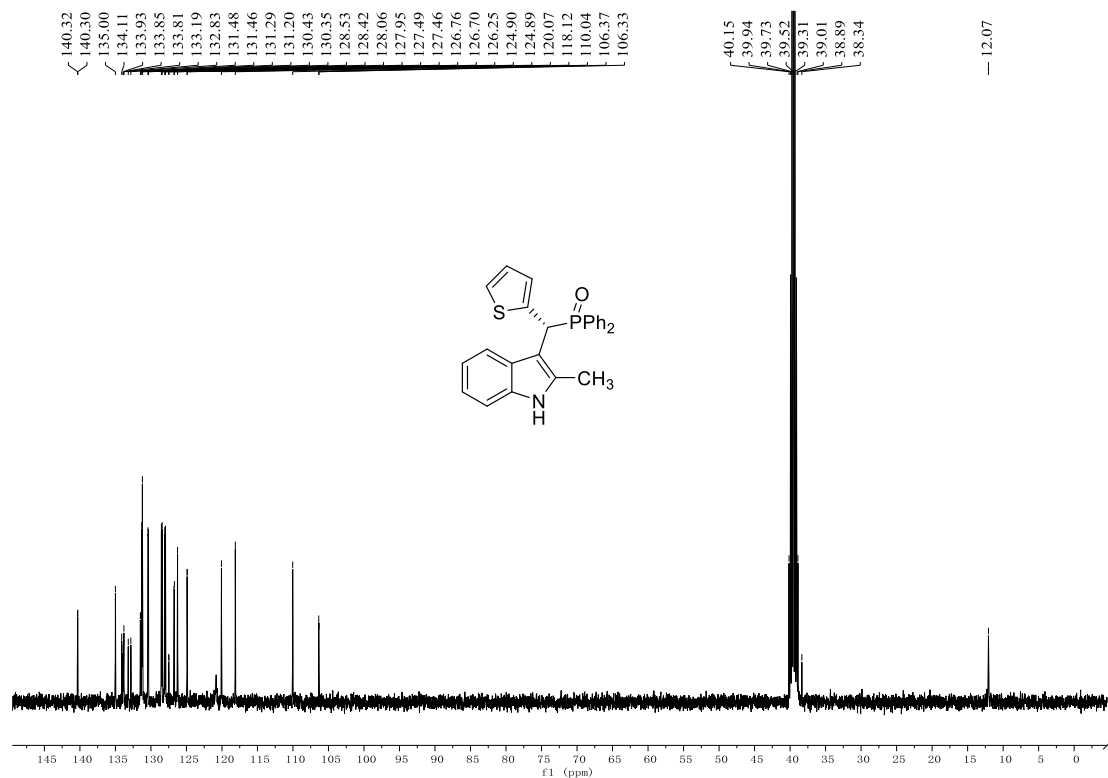

**<sup>31</sup>P NMR spectrum of compound of 3v**

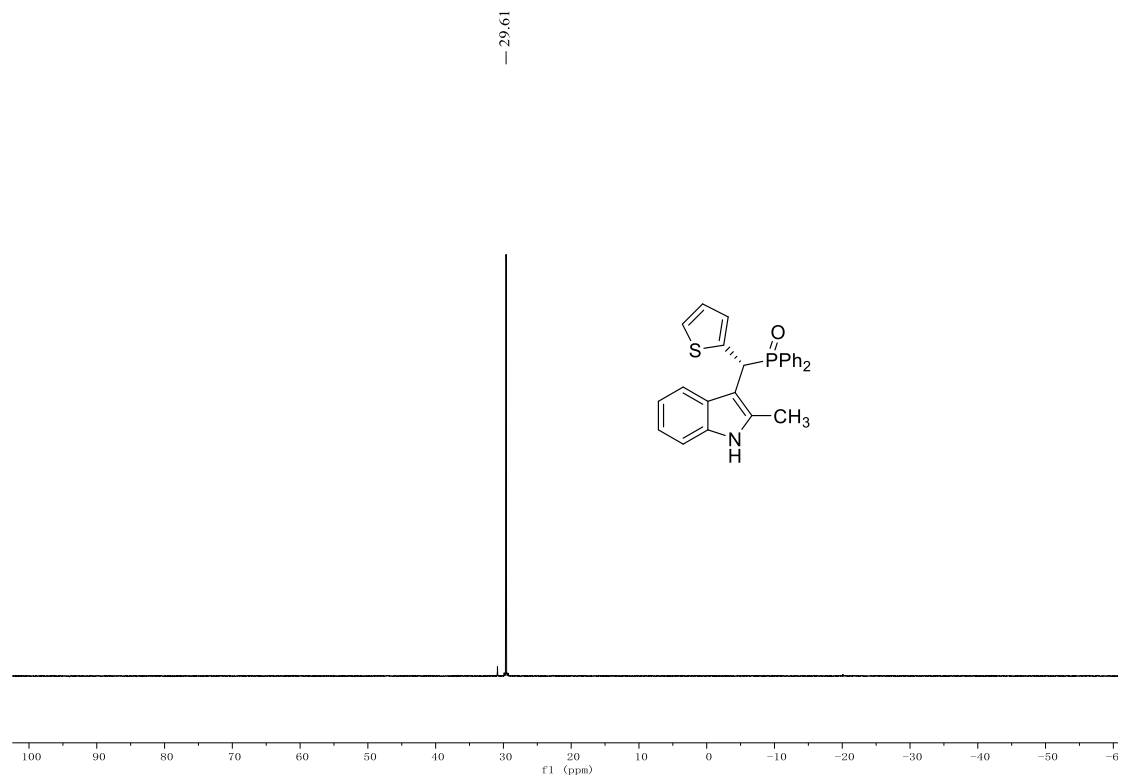

# HPLC spectra of 3v

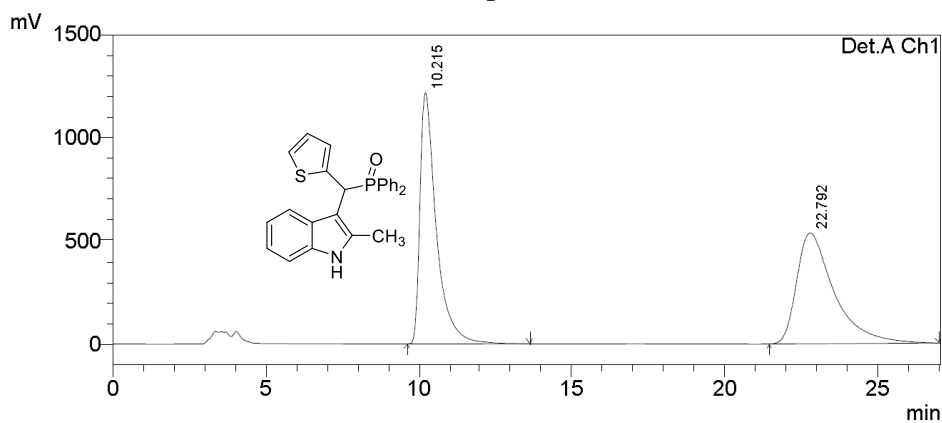

1 Det.A Ch1/254nm

PeakTable

Detector A Ch1 254nm

| Peak# | Ret. Time | Area     | Height  | Area %  |
|-------|-----------|----------|---------|---------|
| 1     | 10.215    | 45131829 | 1215595 | 49.641  |
| 2     | 22.792    | 45783776 | 536250  | 50.359  |
| Total |           | 90915605 |         | 100.000 |

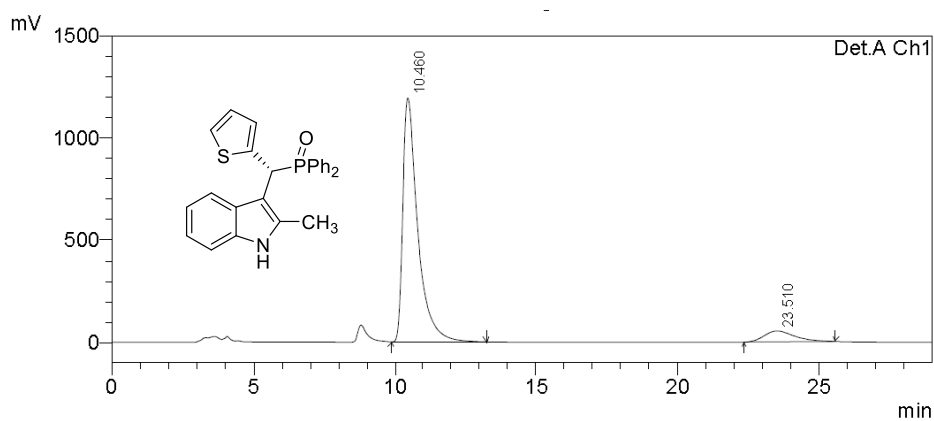

1 Det.A Ch1/254nm

PeakTable

Detector A Ch1 254nm

| Peak# | Ret. Time | Area     | Height  | Area %  |
|-------|-----------|----------|---------|---------|
| 1     | 10.460    | 43612215 | 1192442 | 91.521  |
| 2     | 23.510    | 4040504  | 53477   | 8.479   |
| Total |           | 47652719 |         | 100.000 |

**<sup>1</sup>H NMR spectrum of compound of 3w**

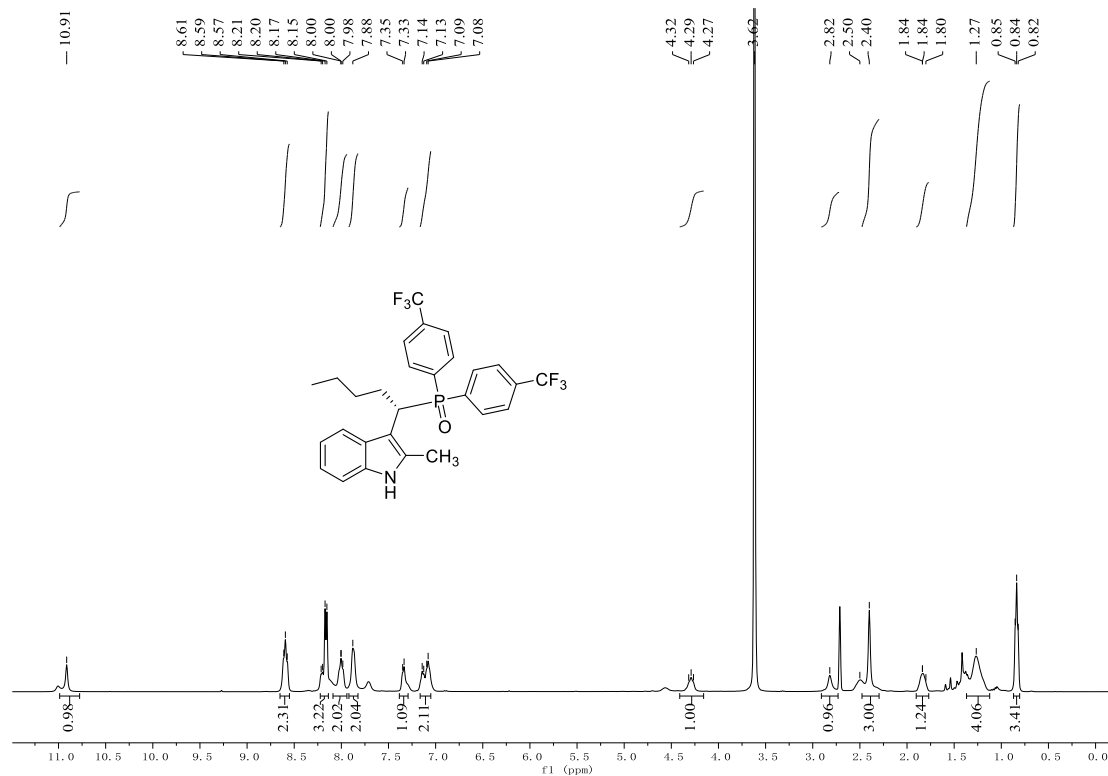

**<sup>13</sup>C NMR spectrum of compound of 3w**

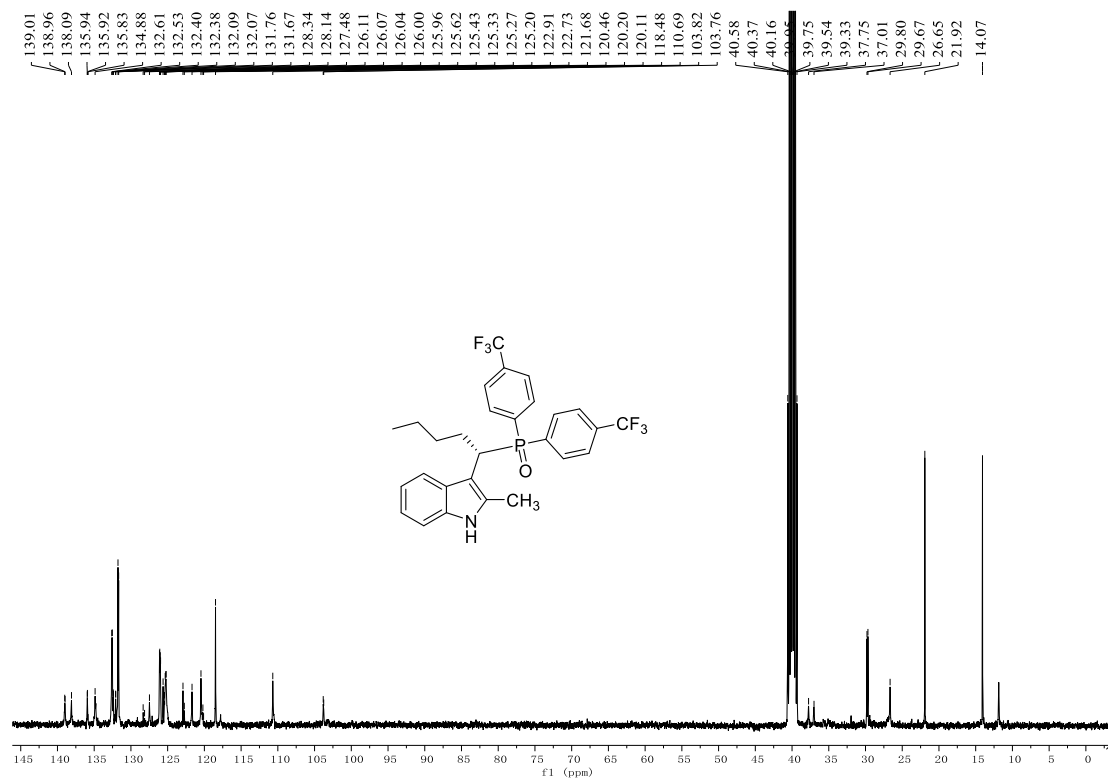

**$^{31}\text{P}$  NMR spectrum of compound of 3w**

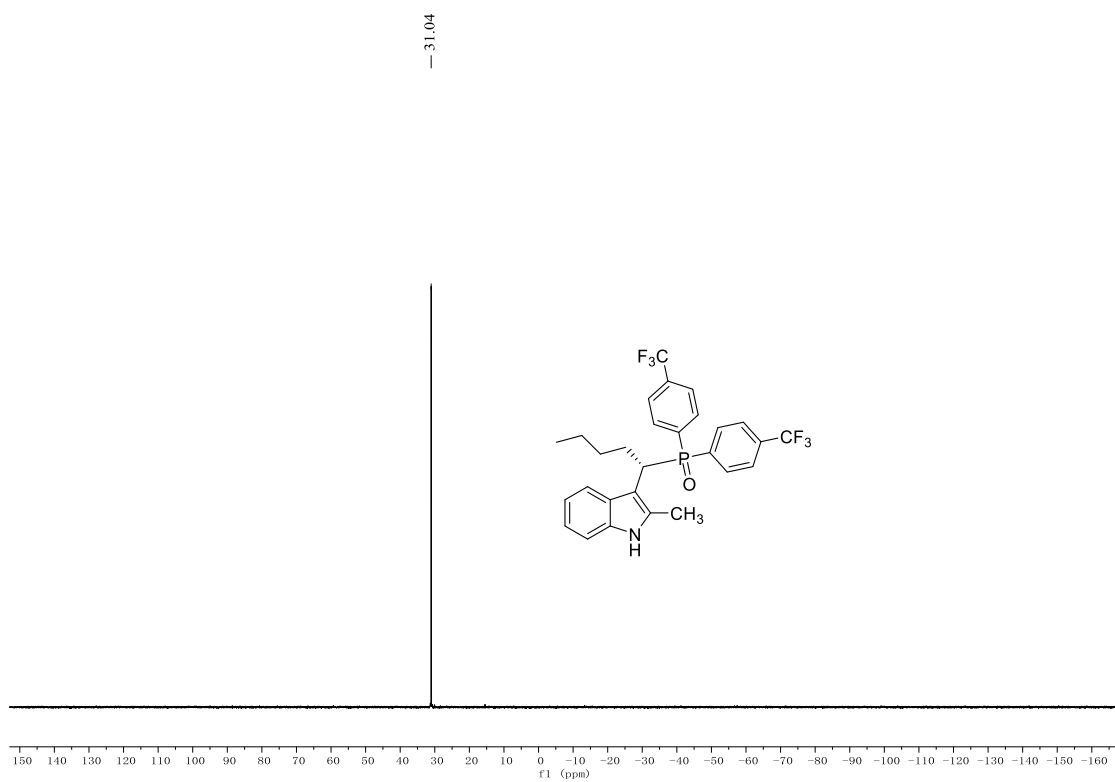

**$^{19}\text{F}$  NMR spectrum of compound of 3w**

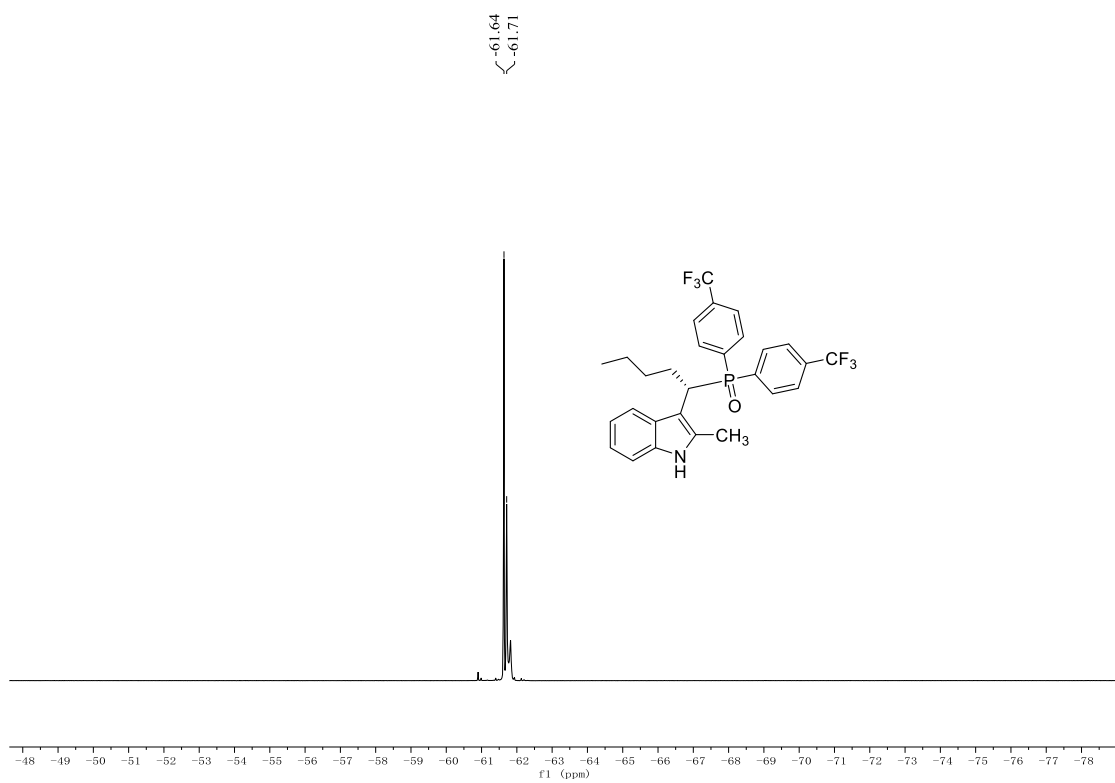

## HPLC spectra of 3w

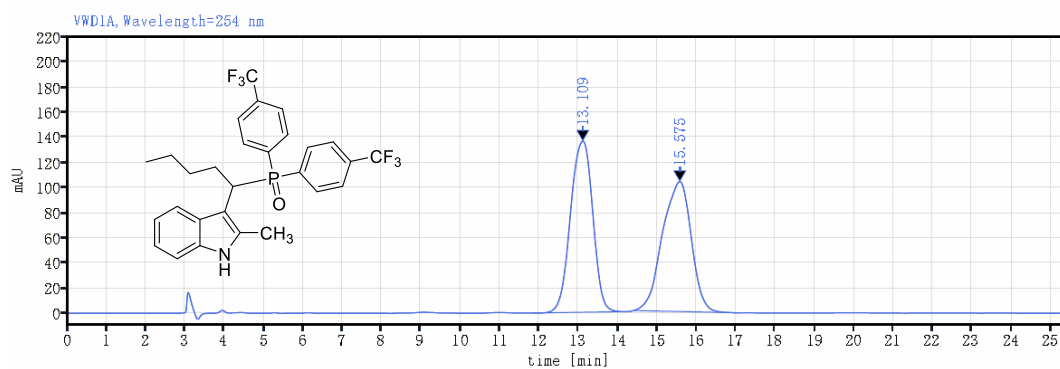

Detector VWD1A, Wavelength=254 nm

| Peak | Ret.Time [min] | Area     | Height | Area%  |
|------|----------------|----------|--------|--------|
|      | 13.109         | 5358.93  | 136.38 | 50.45  |
|      | 15.575         | 5263.71  | 103.55 | 49.55  |
|      |                | 10622.64 |        | 100.00 |

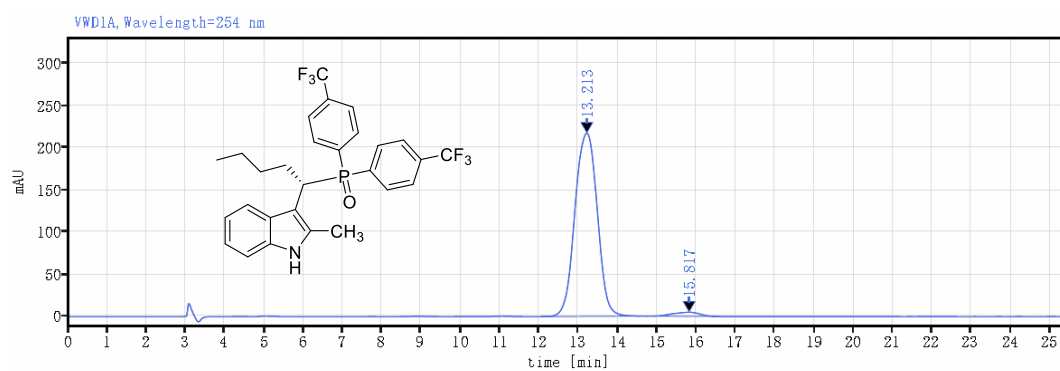

Detector VWD1A, Wavelength=254 nm

| Peak | Ret.Time [min] | Area    | Height | Area%  |
|------|----------------|---------|--------|--------|
|      | 13.213         | 8595.05 | 217.05 | 97.40  |
|      | 15.817         | 229.73  | 4.85   | 2.60   |
|      |                | 8824.77 |        | 100.00 |

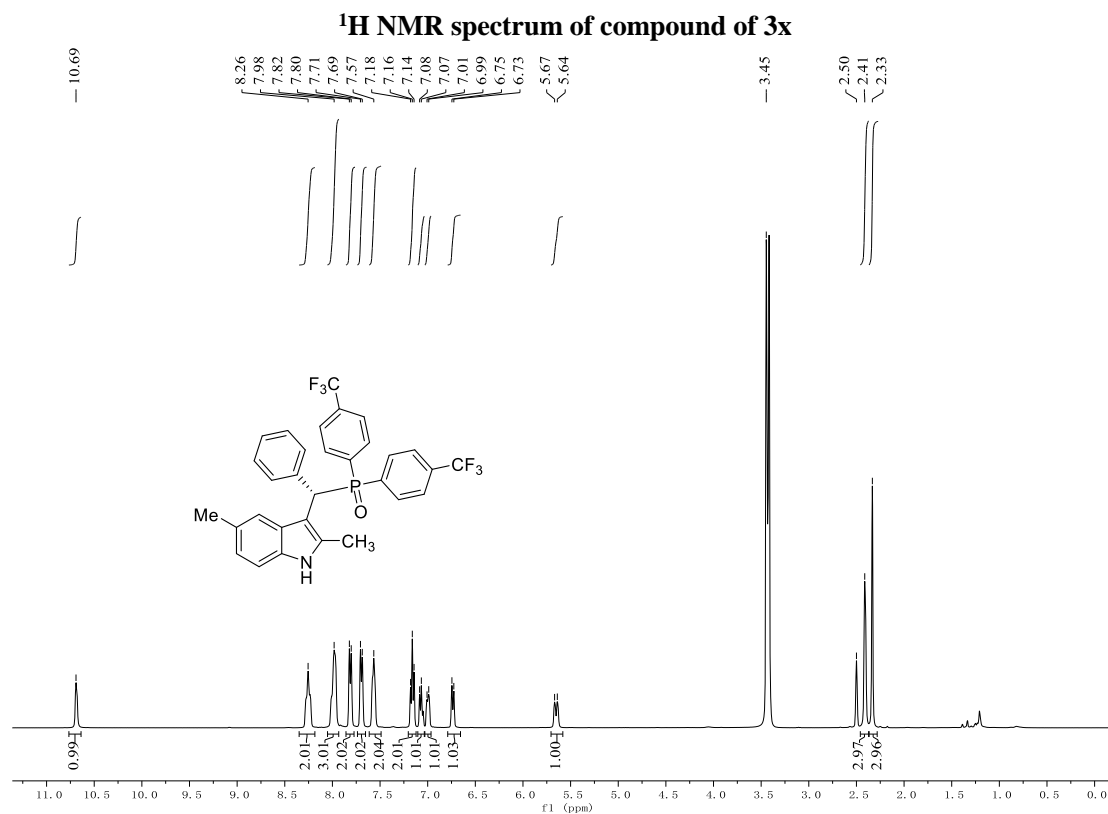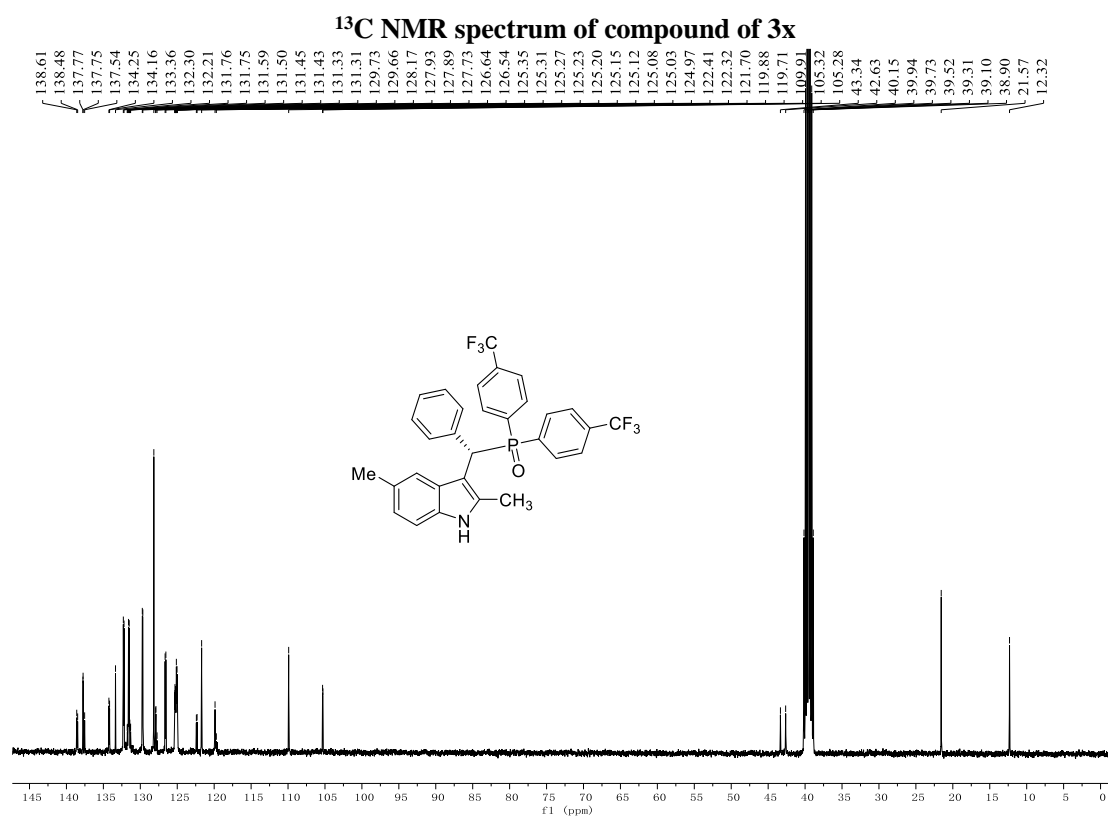

**$^{31}\text{P}$  NMR spectrum of compound of 3x**

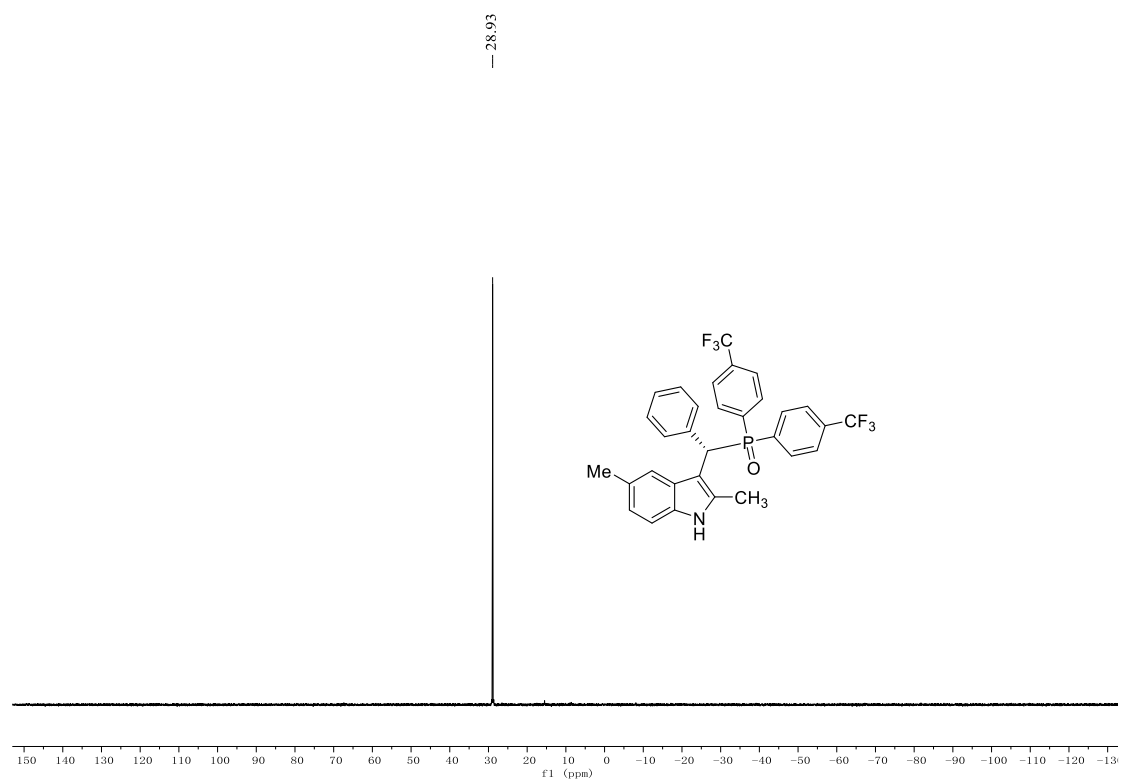

**$^{19}\text{F}$  NMR spectrum of compound of 3x**

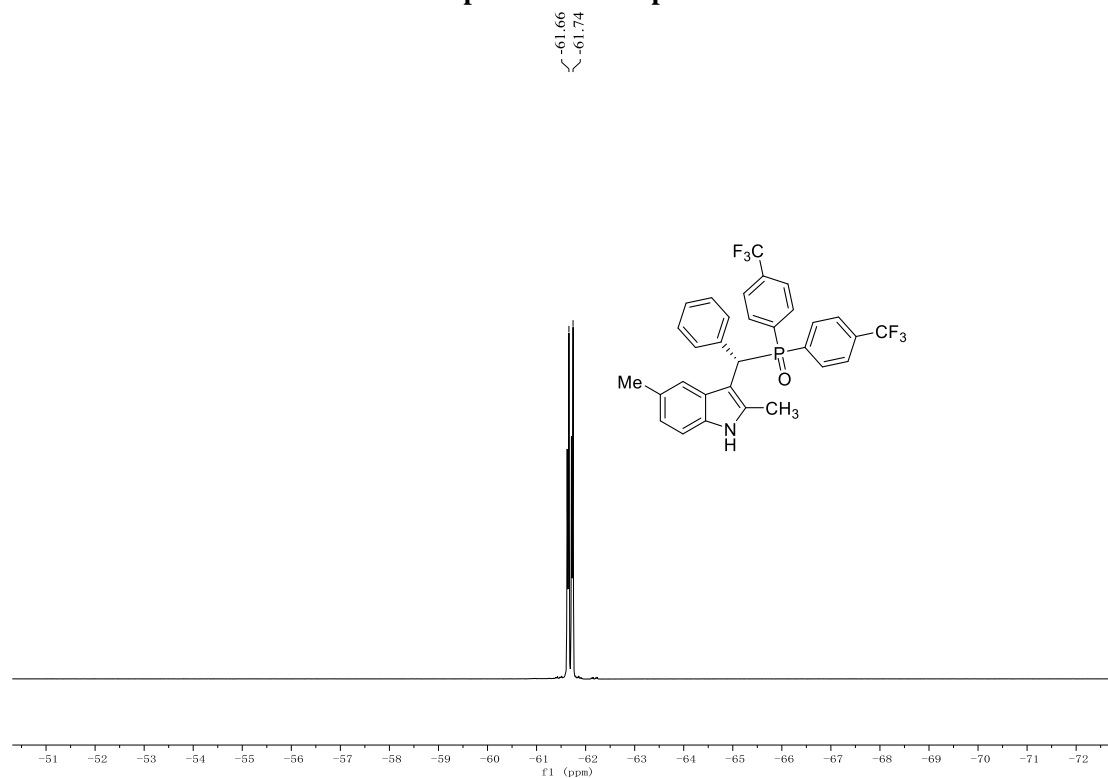



## HPLC spectra of 3x

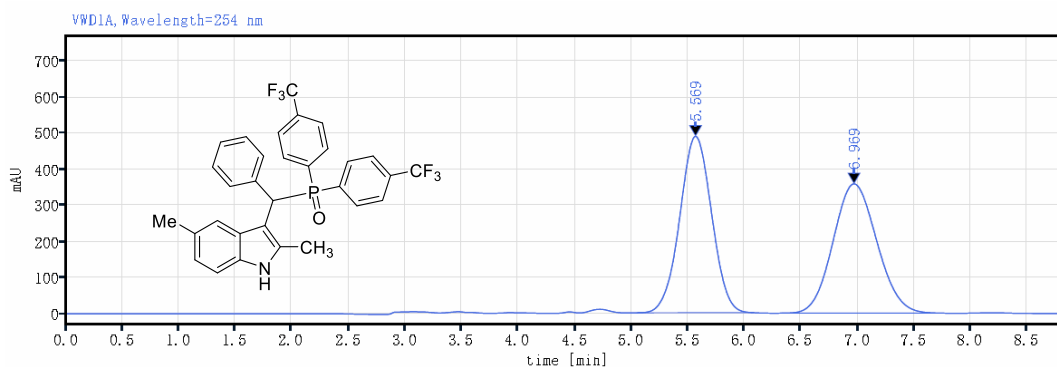

Detector VWD1A, Wavelength=254 nm

| Peak | Ret. Time [min] | Area     | Height | Area%  |
|------|-----------------|----------|--------|--------|
|      | 5.569           | 9581.66  | 489.26 | 49.84  |
|      | 6.969           | 9644.02  | 358.58 | 50.16  |
|      |                 | 19225.69 |        | 100.00 |

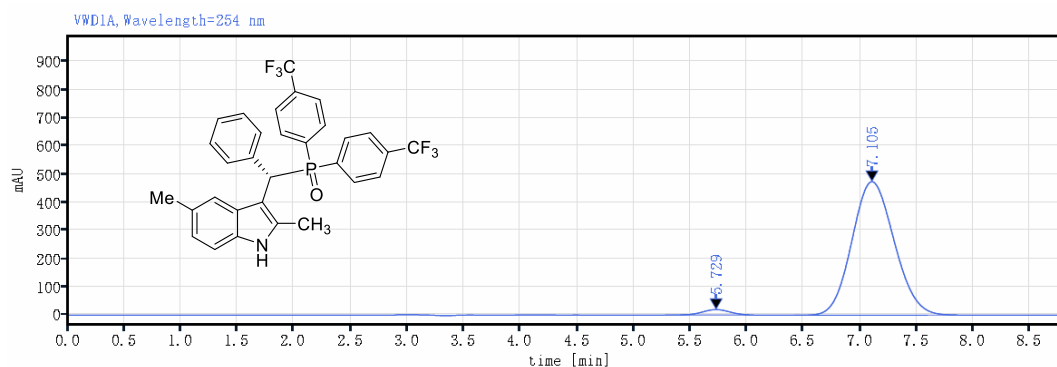

Detector VWD1A, Wavelength=254 nm

| Peak | Ret. Time [min] | Area     | Height | Area%  |
|------|-----------------|----------|--------|--------|
|      | 5.729           | 308.58   | 18.89  | 2.45   |
|      | 7.105           | 12292.60 | 473.62 | 97.55  |
|      |                 | 12601.18 |        | 100.00 |

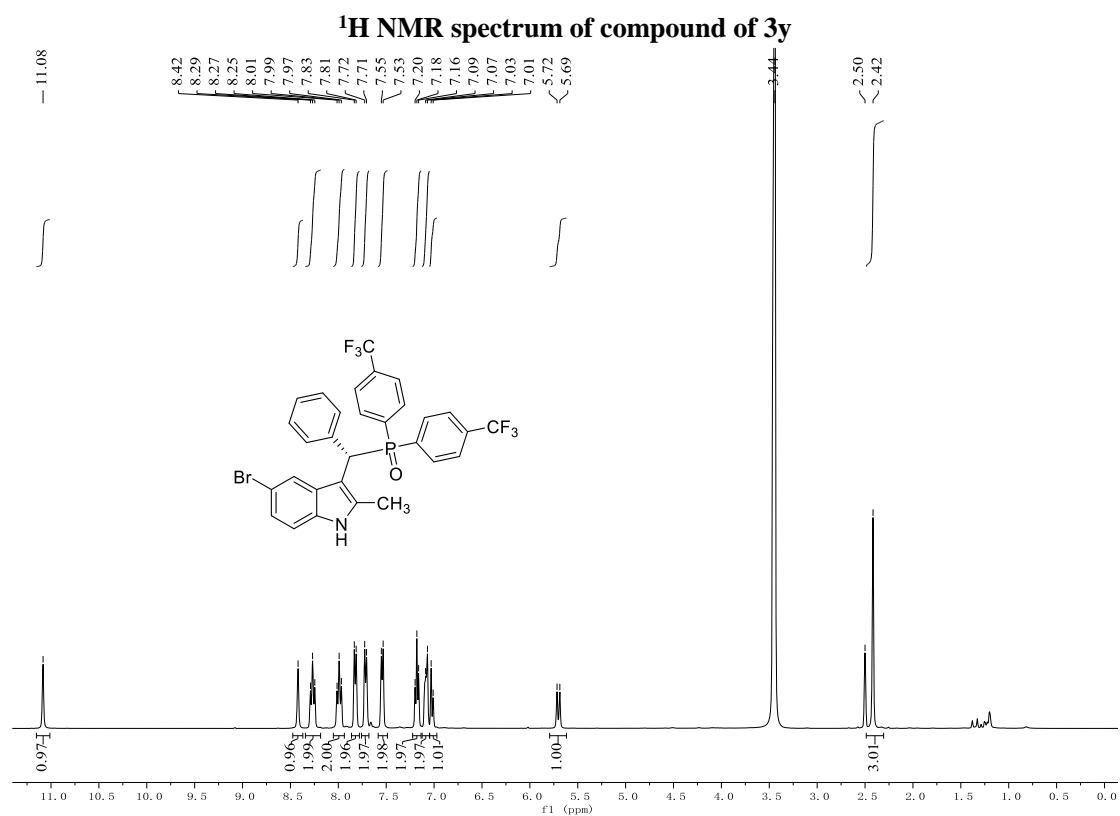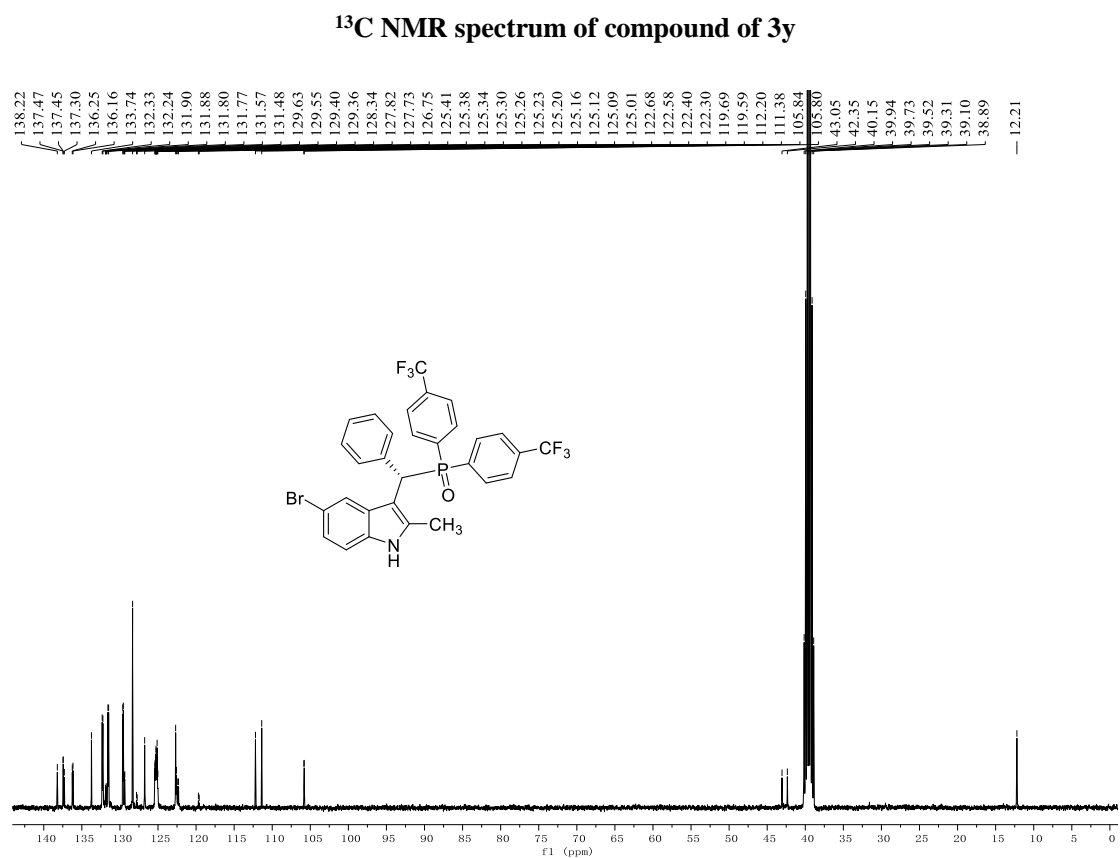

**<sup>31</sup>P NMR spectrum of compound of 3y**

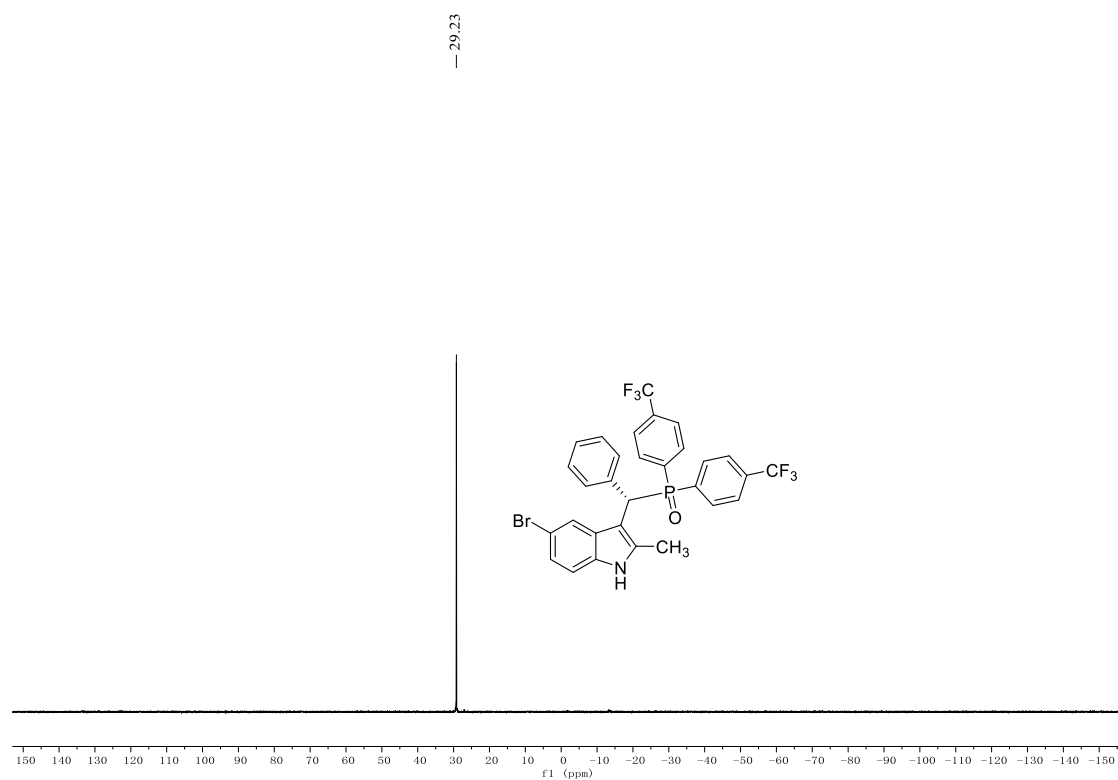

**<sup>19</sup>F NMR spectrum of compound of 3y**

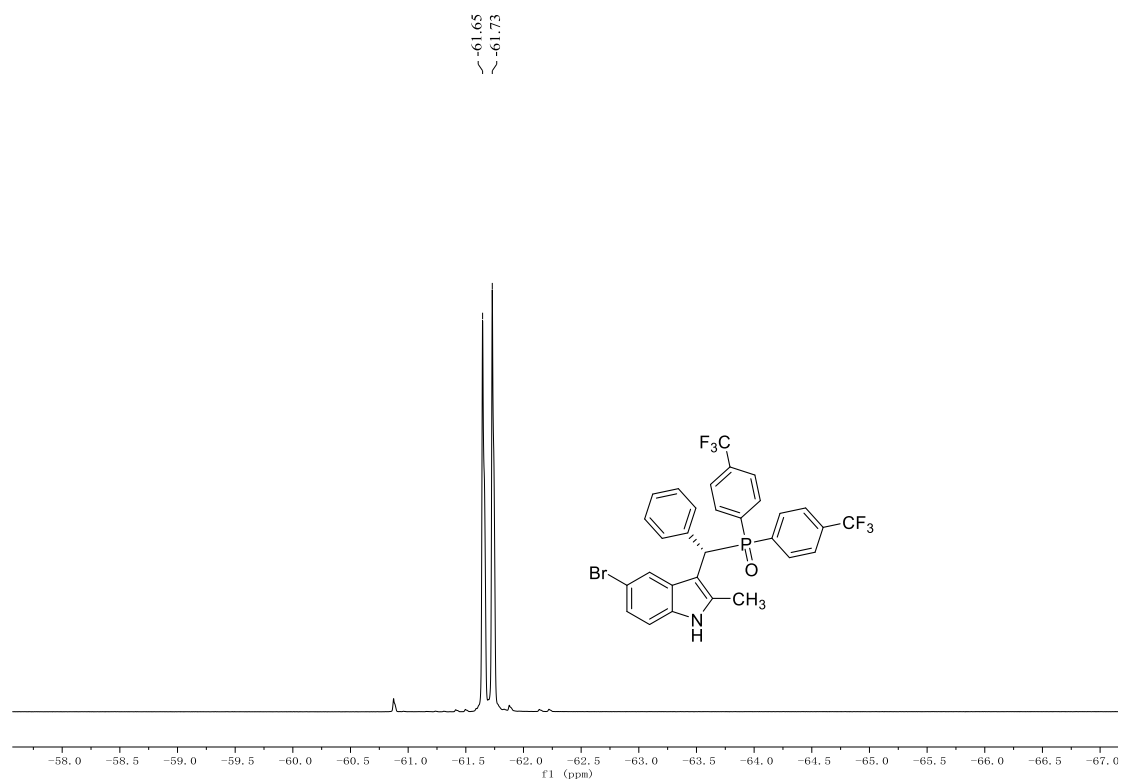

## HPLC spectra of 3y

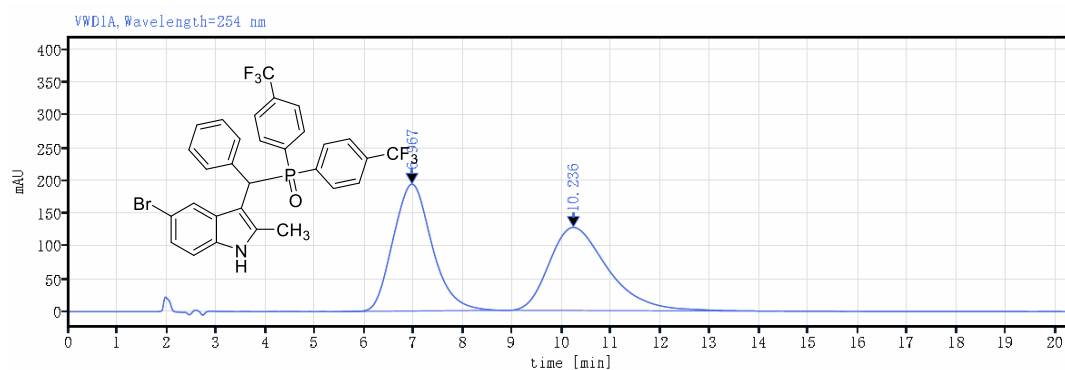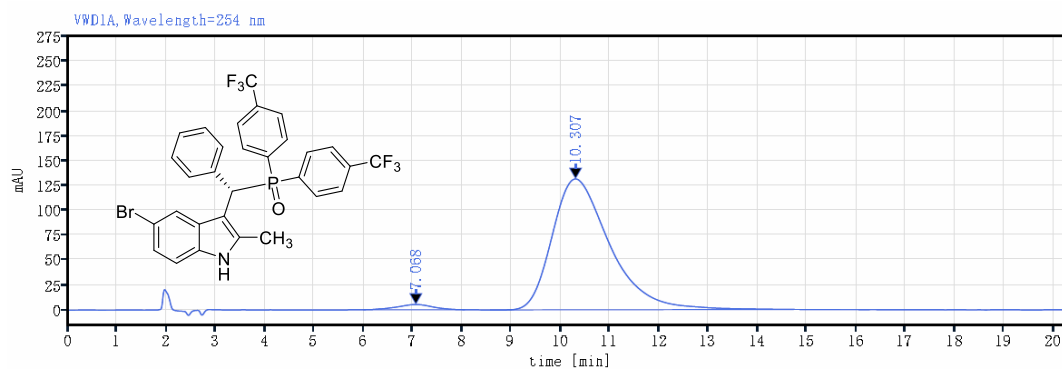

Detector VWD1A, Wavelength=254 nm

| Peak | Ret.Time [min] | Area     | Height | Area%  |
|------|----------------|----------|--------|--------|
|      | 7.068          | 262.80   | 5.25   | 2.40   |
|      | 10.307         | 10687.75 | 131.66 | 97.60  |
|      |                | 10950.56 |        | 100.00 |

**<sup>1</sup>H NMR spectrum of compound of 3z**

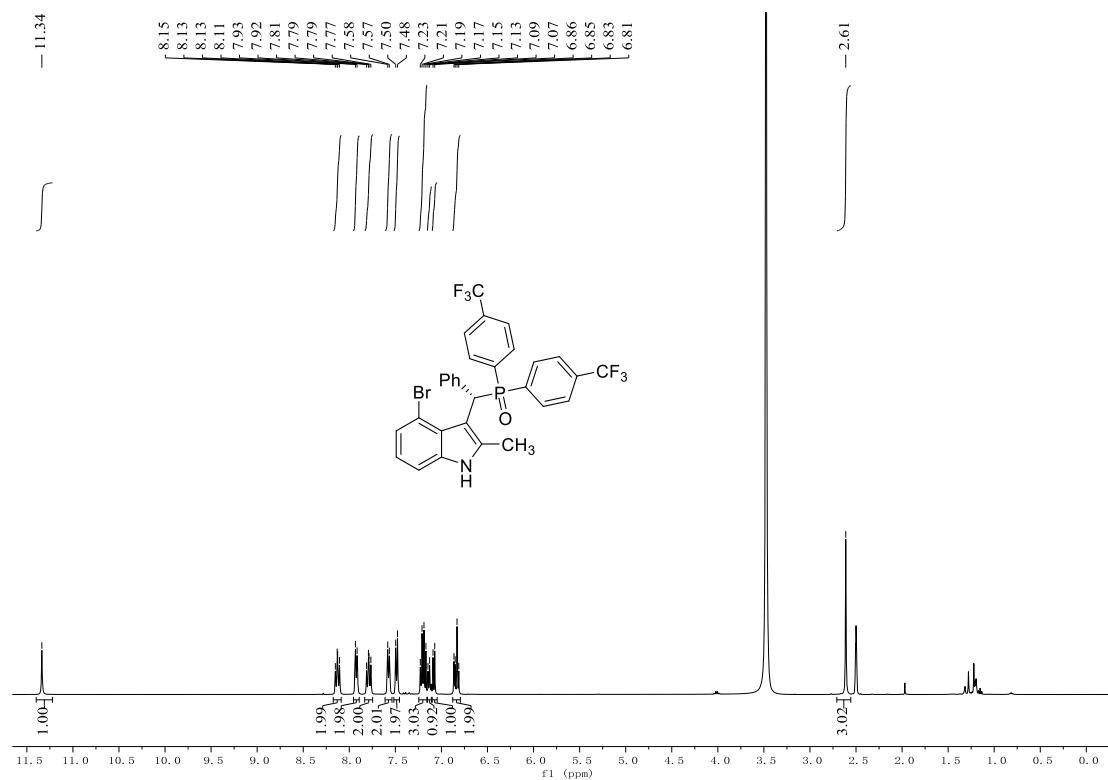

**<sup>13</sup>C NMR spectrum of compound of 3z**

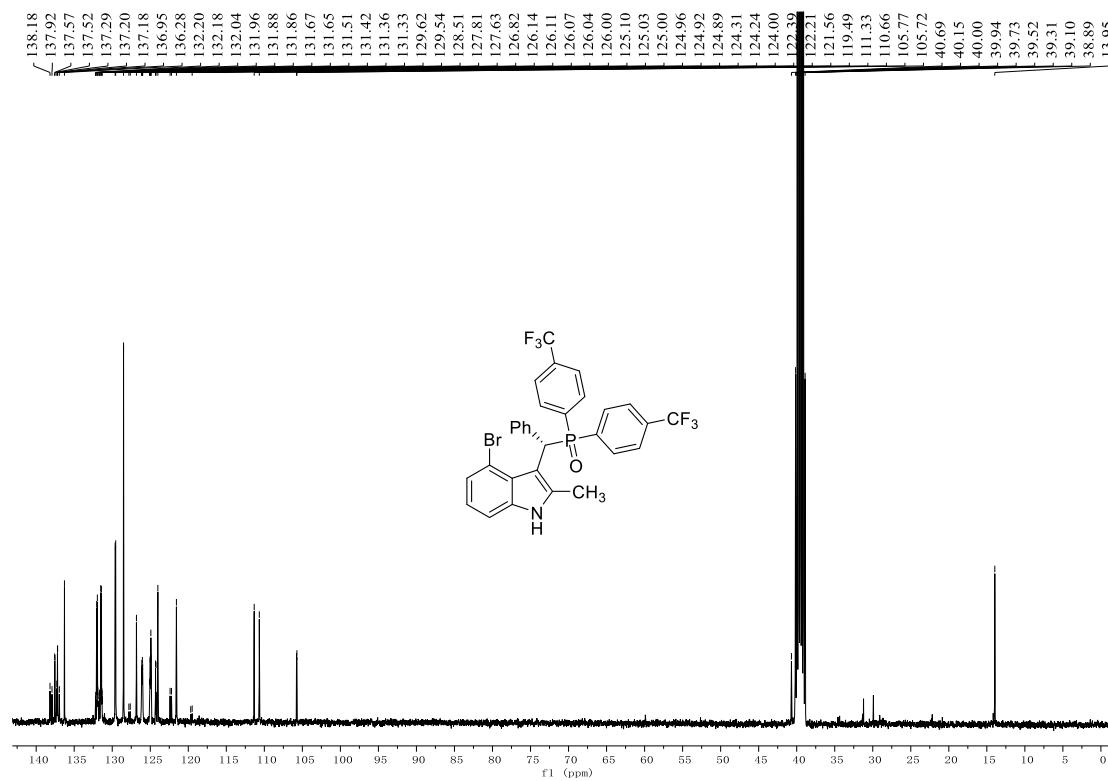

**$^{31}\text{P}$  NMR spectrum of compound of 3z**

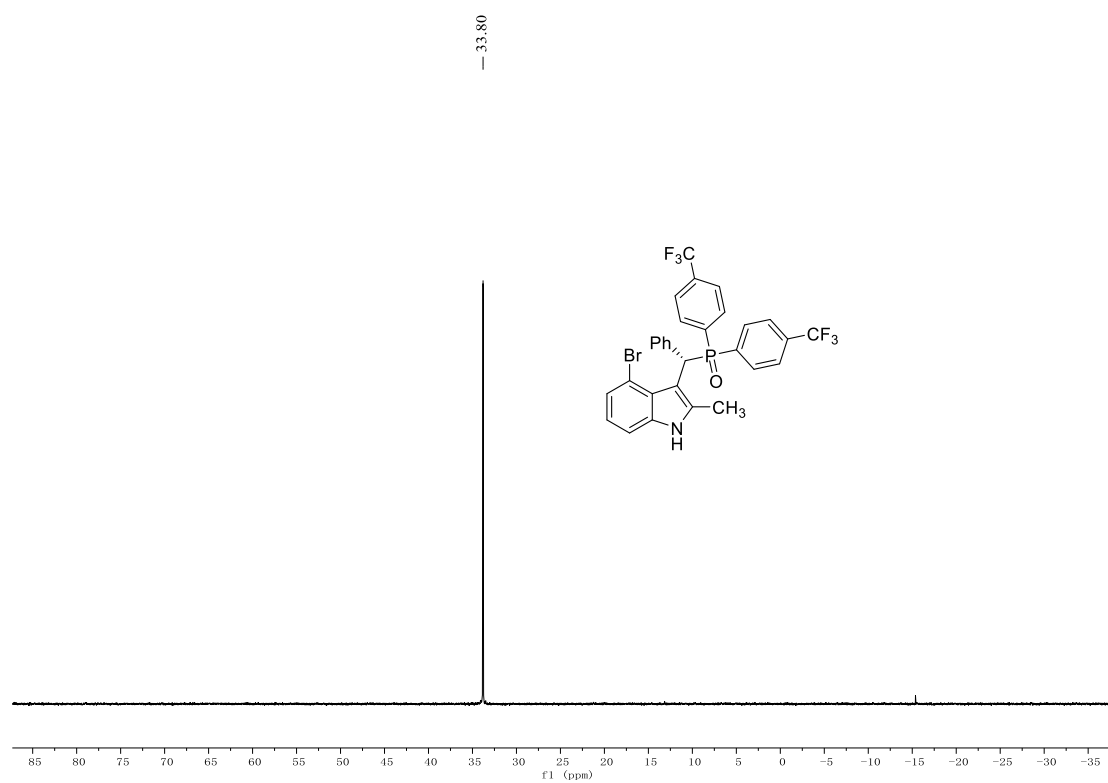

**$^{19}\text{F}$  NMR spectrum of compound of 3z**

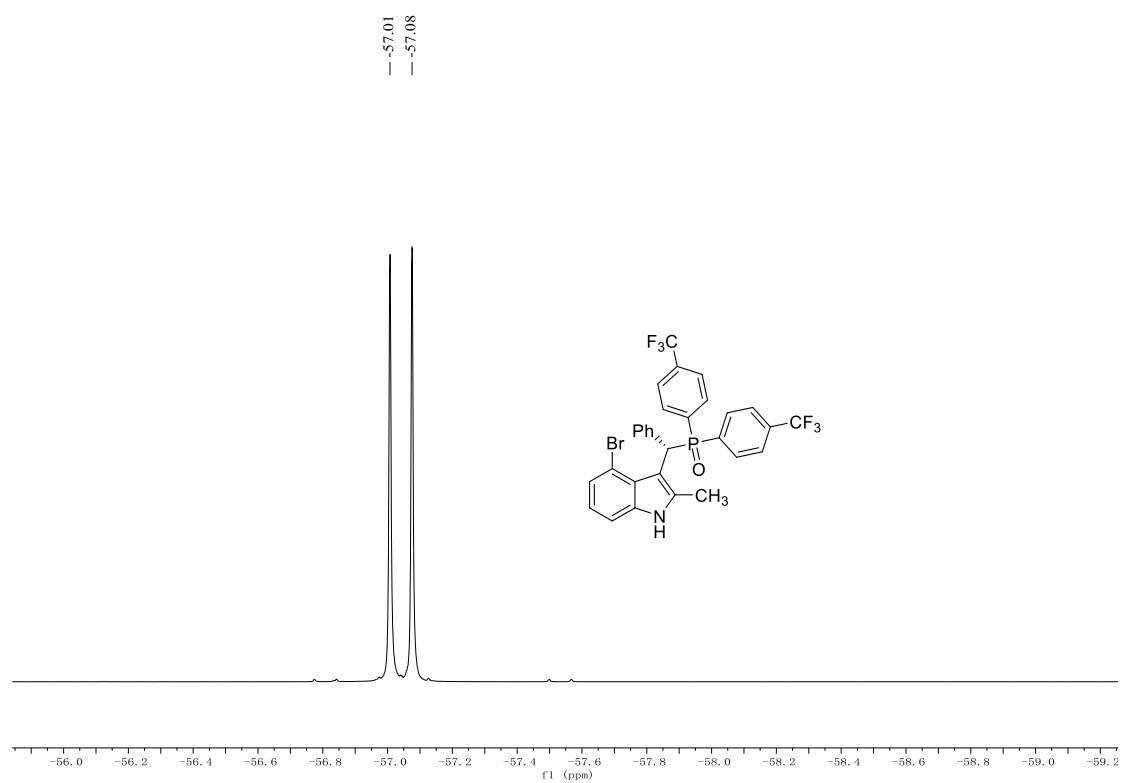

## HPLC spectra of 3z

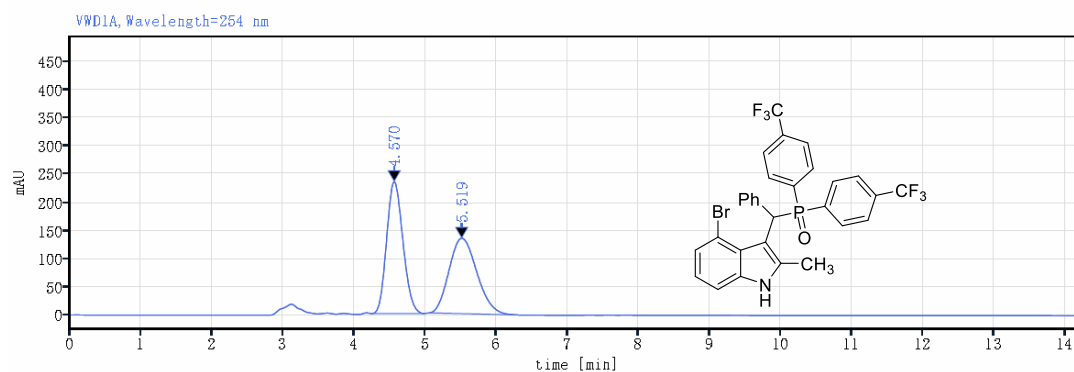

Detector VWD1A, Wavelength=254 nm

| Peak | Ret. Time [min] | Area    | Height | Area%  |
|------|-----------------|---------|--------|--------|
|      | 4.570           | 3727.64 | 234.89 | 50.52  |
|      | 5.519           | 3650.82 | 134.32 | 49.48  |
|      |                 | 7378.46 |        | 100.00 |

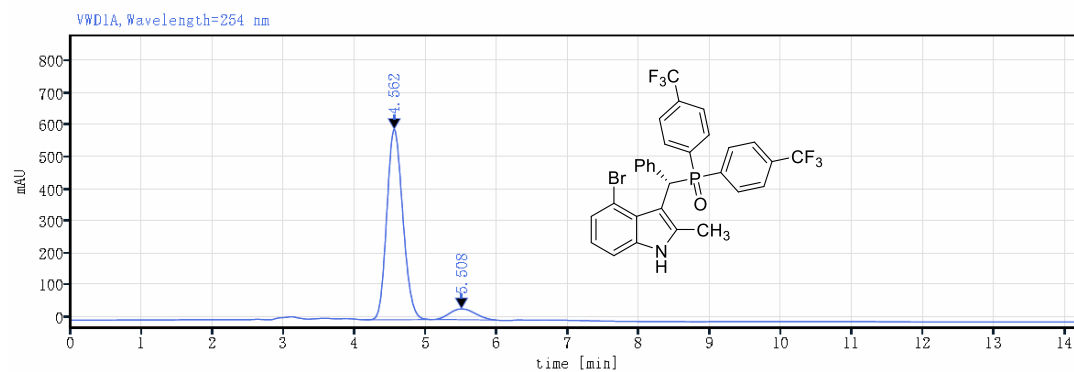

Detector VWD1A, Wavelength=254 nm

| Peak | Ret. Time [min] | Area     | Height | Area%  |
|------|-----------------|----------|--------|--------|
|      | 4.562           | 9303.56  | 593.87 | 91.71  |
|      | 5.508           | 840.73   | 33.38  | 8.29   |
|      |                 | 10144.30 |        | 100.00 |

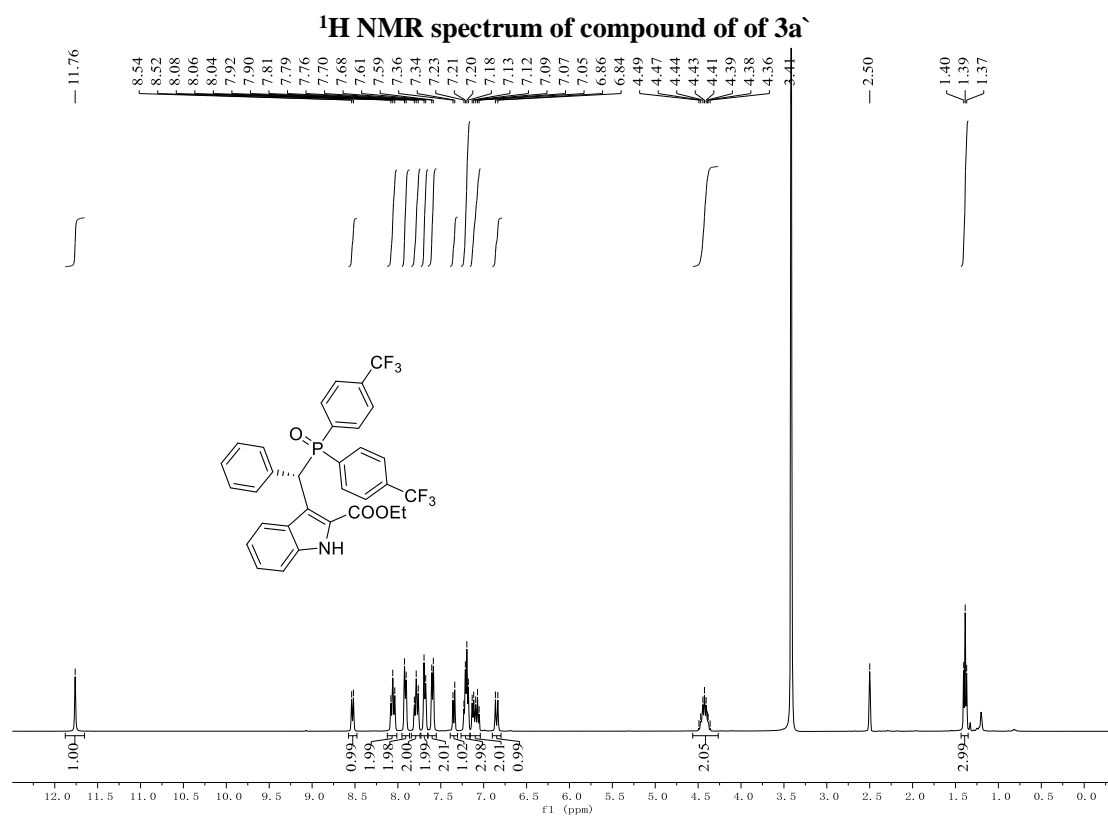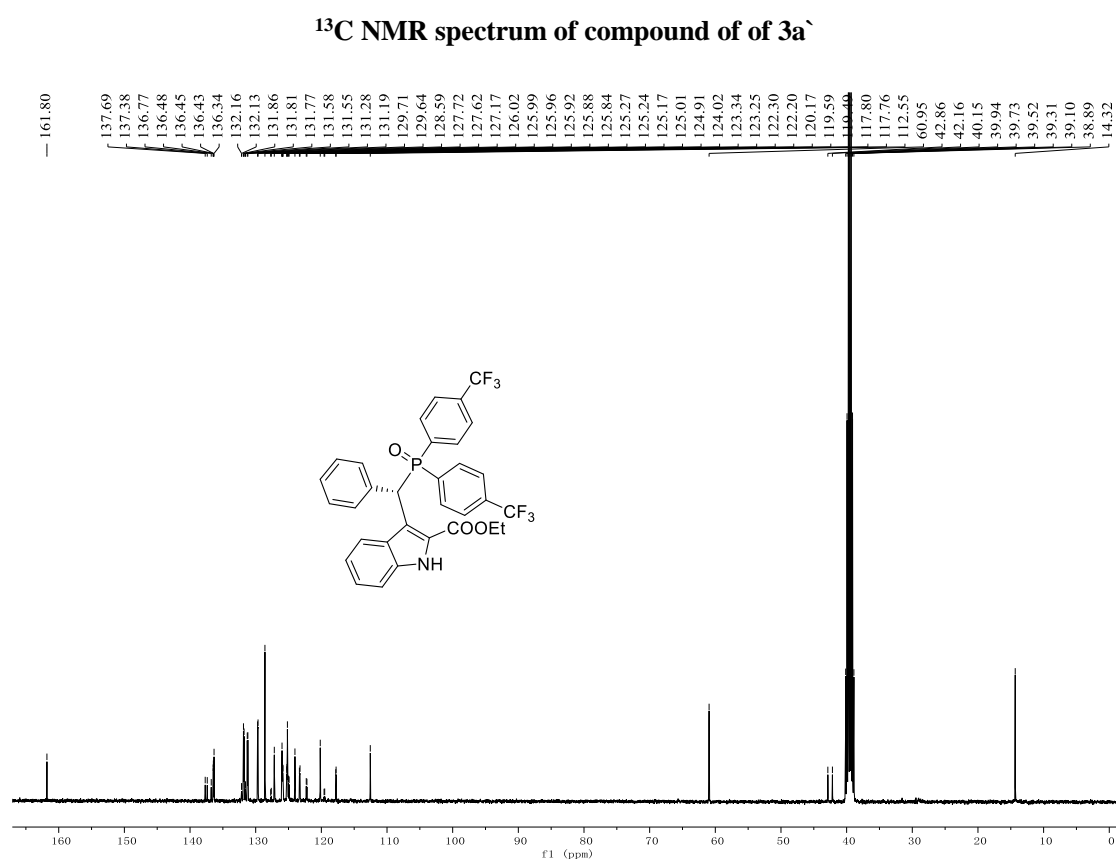



# **<sup>31</sup>P NMR spectrum of compound of 3a`**

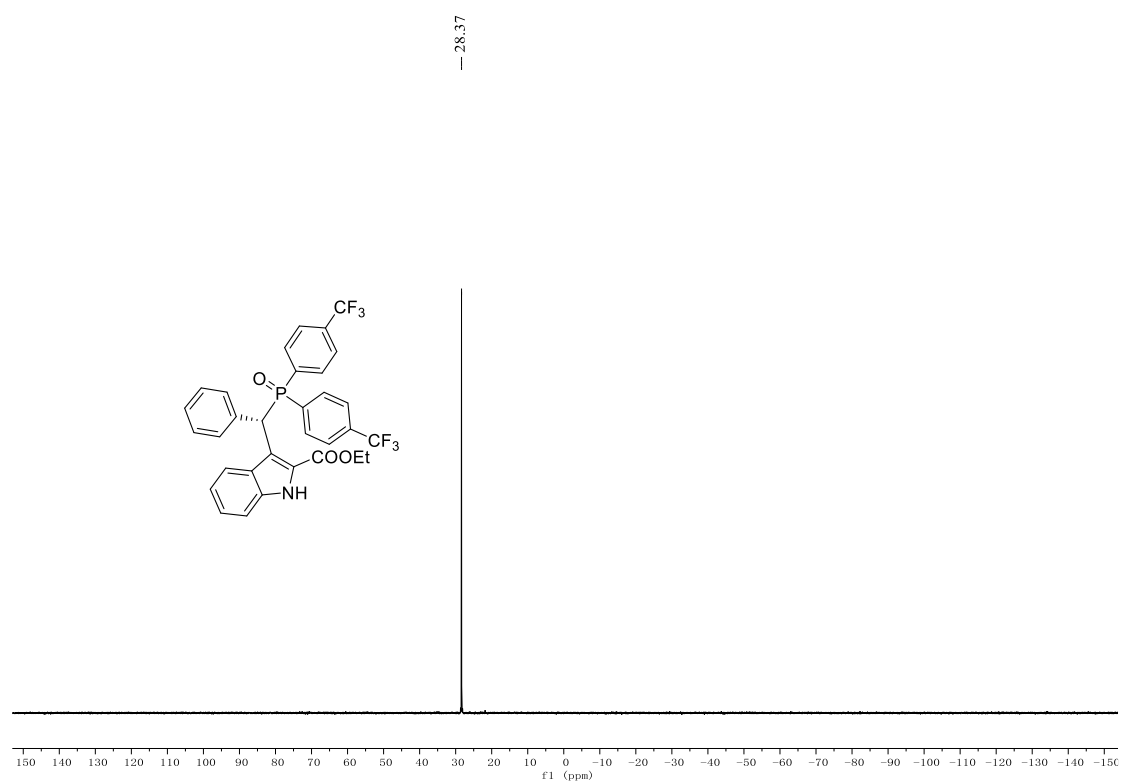

# **<sup>19</sup>F NMR spectrum of compound of 3a`**

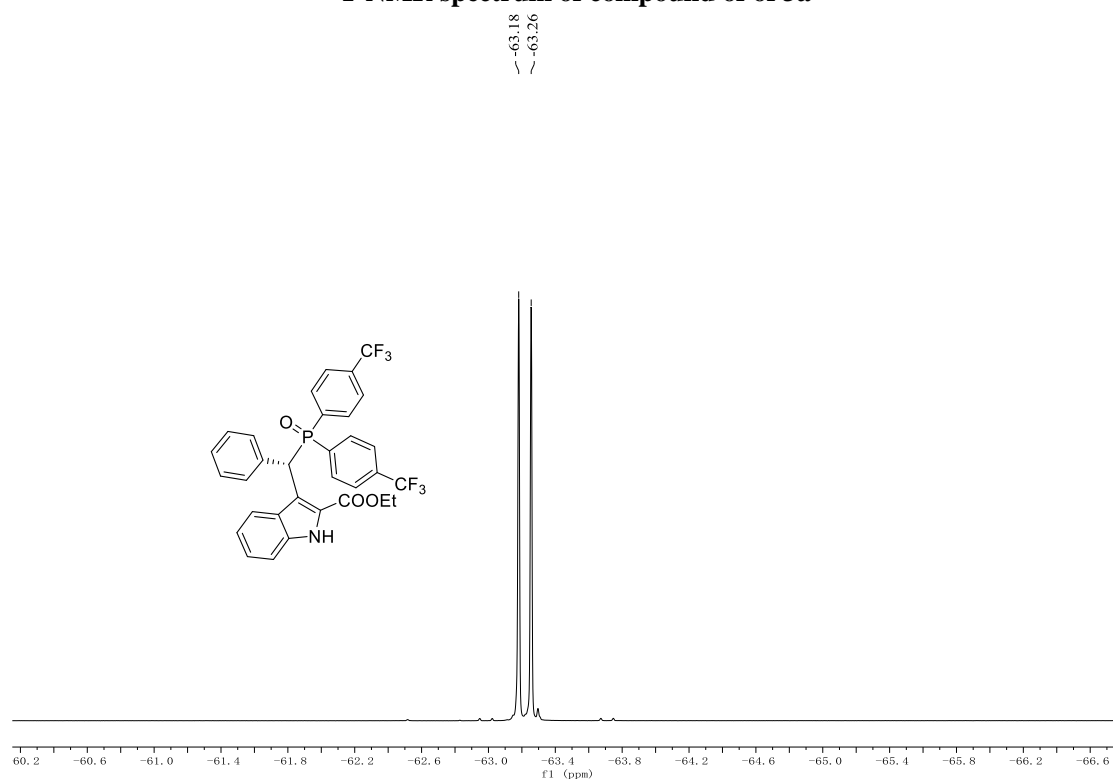

## HPLC spectra of 3a`

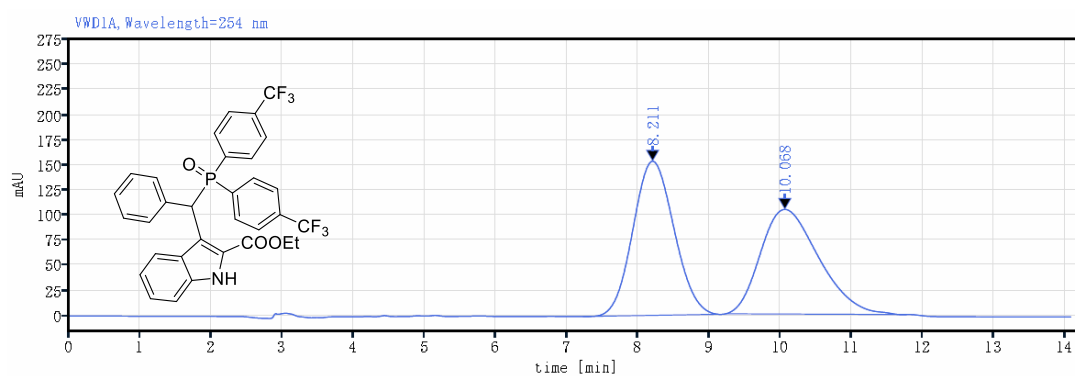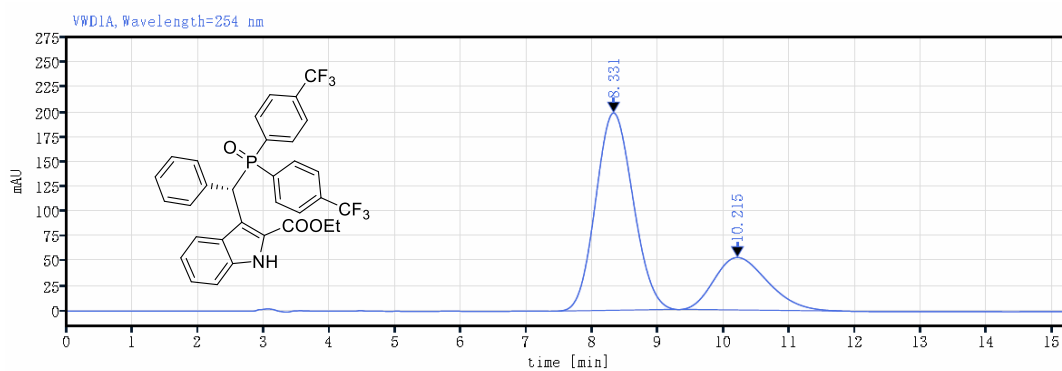

Detector VWD1A, Wavelength=254 nm

| Peak | Ret. Time [min] | Area     | Height | Area%  |
|------|-----------------|----------|--------|--------|
|      | 8.331           | 7853.37  | 198.64 | 72.51  |
|      | 10.215          | 2976.79  | 52.77  | 27.49  |
|      |                 | 10830.16 |        | 100.00 |

**<sup>1</sup>H NMR spectrum of compound of 3b`**

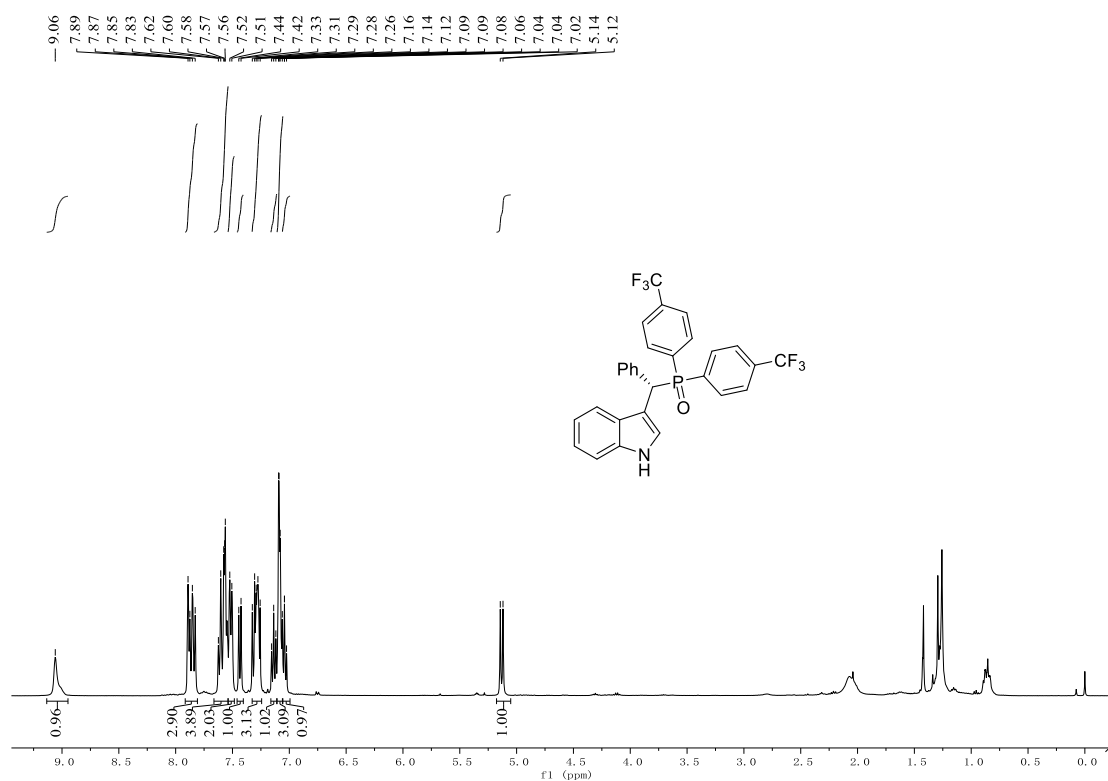

**<sup>13</sup>C NMR spectrum of compound of 3b`**

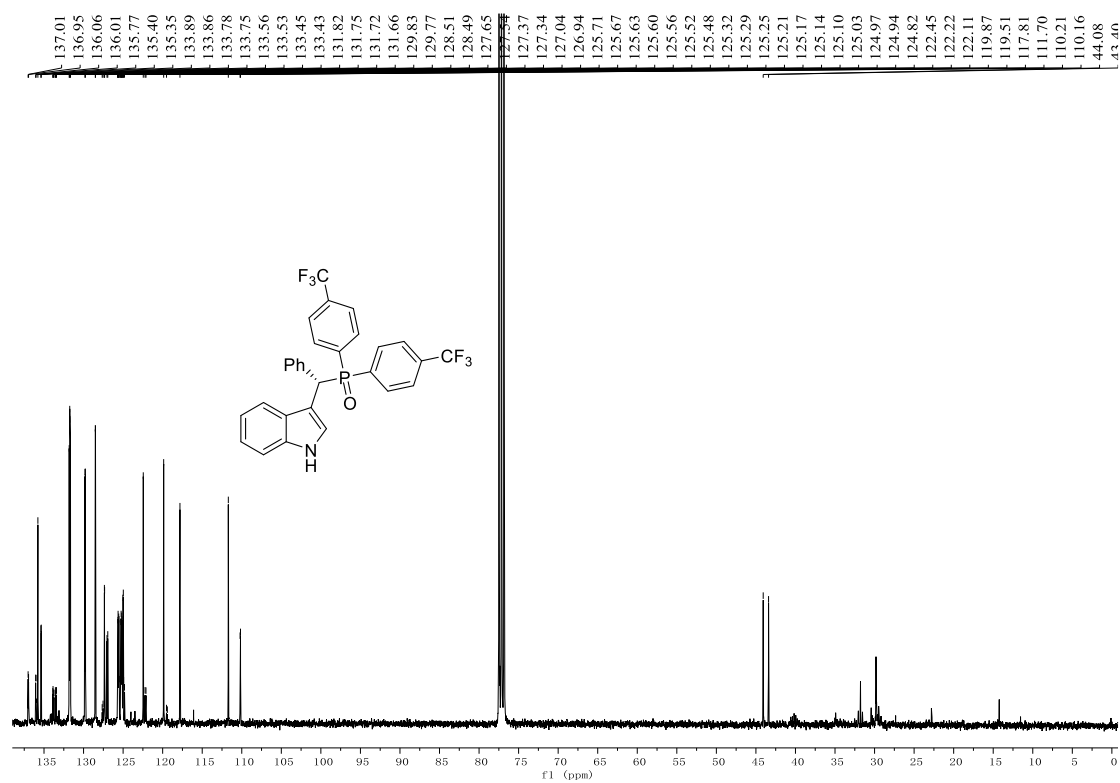

**$^{31}\text{P}$  NMR spectrum of compound of 3b`**

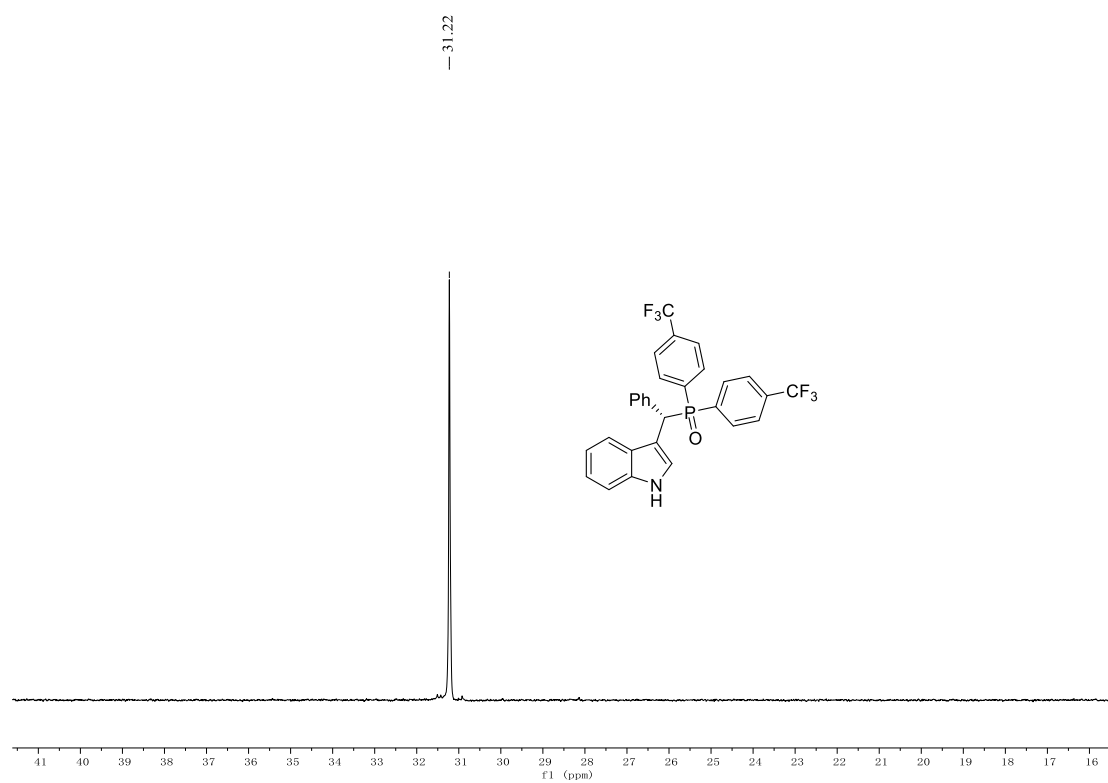

**$^{19}\text{F}$  NMR spectrum of compound of 3b`**

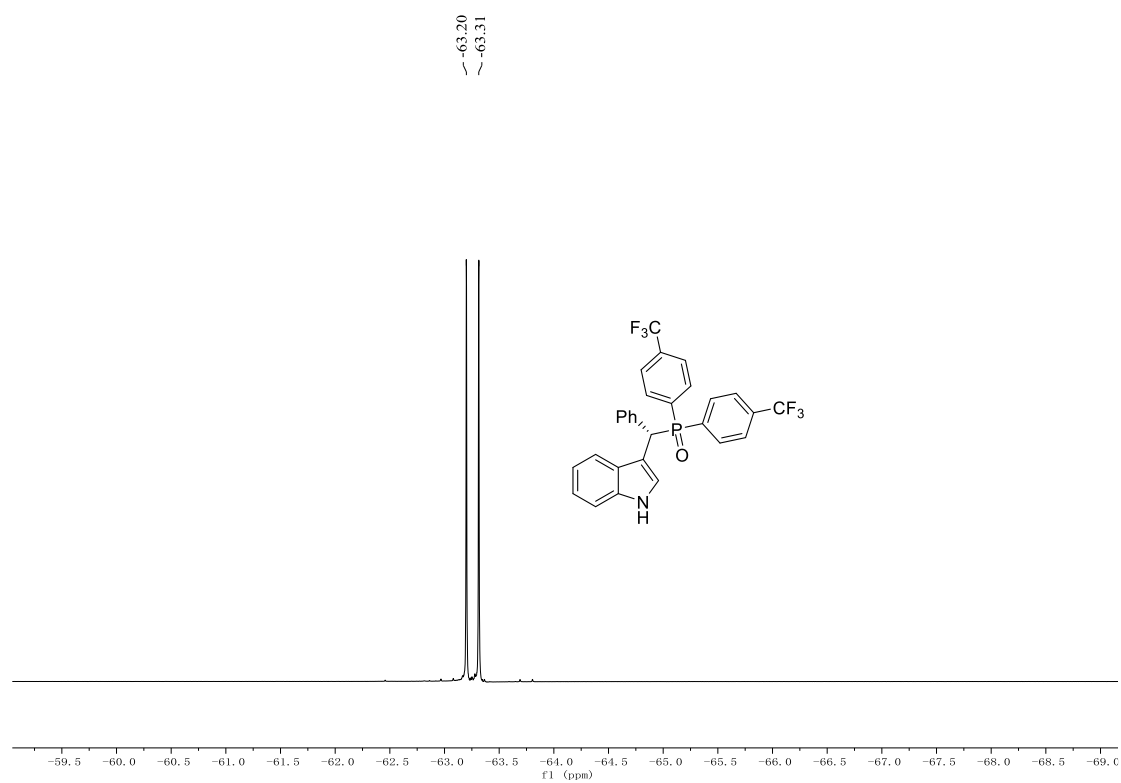

## HPLC spectra of 3b`

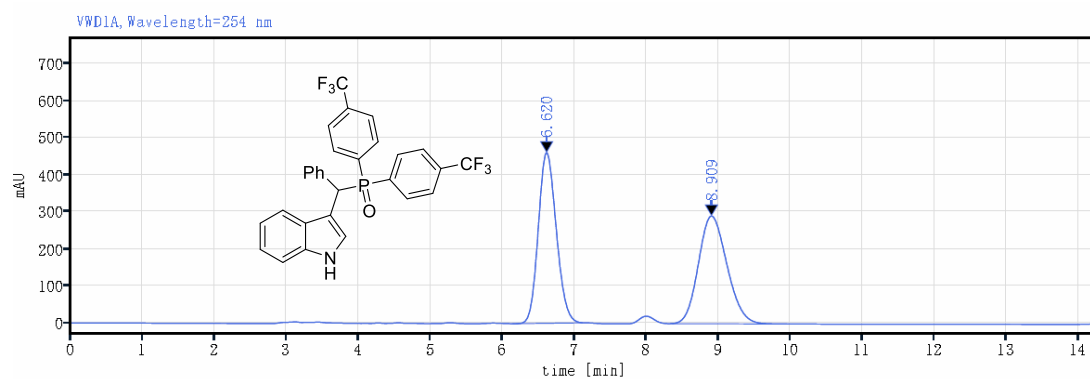

Detector VWD1A, Wavelength=254 nm

| Peak | Ret. Time [min] | Area     | Height | Area%  |
|------|-----------------|----------|--------|--------|
|      | 6.620           | 8019.17  | 461.33 | 49.99  |
|      | 8.909           | 8021.02  | 291.39 | 50.01  |
|      |                 | 16040.19 |        | 100.00 |

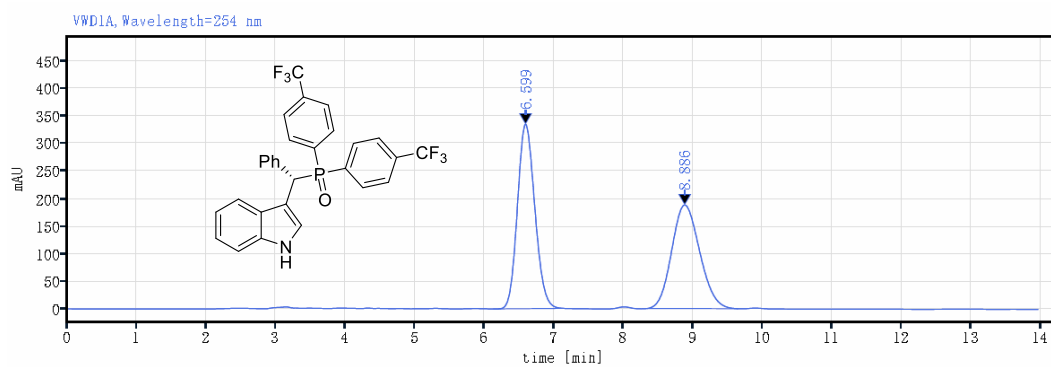

Detector VWD1A, Wavelength=254 nm

| Peak | Ret. Time [min] | Area     | Height | Area%  |
|------|-----------------|----------|--------|--------|
|      | 6.599           | 5827.97  | 335.86 | 52.52  |
|      | 8.886           | 5267.86  | 188.62 | 47.48  |
|      |                 | 11095.83 |        | 100.00 |

<sup>1</sup>H NMR spectrum of compound of 3c`

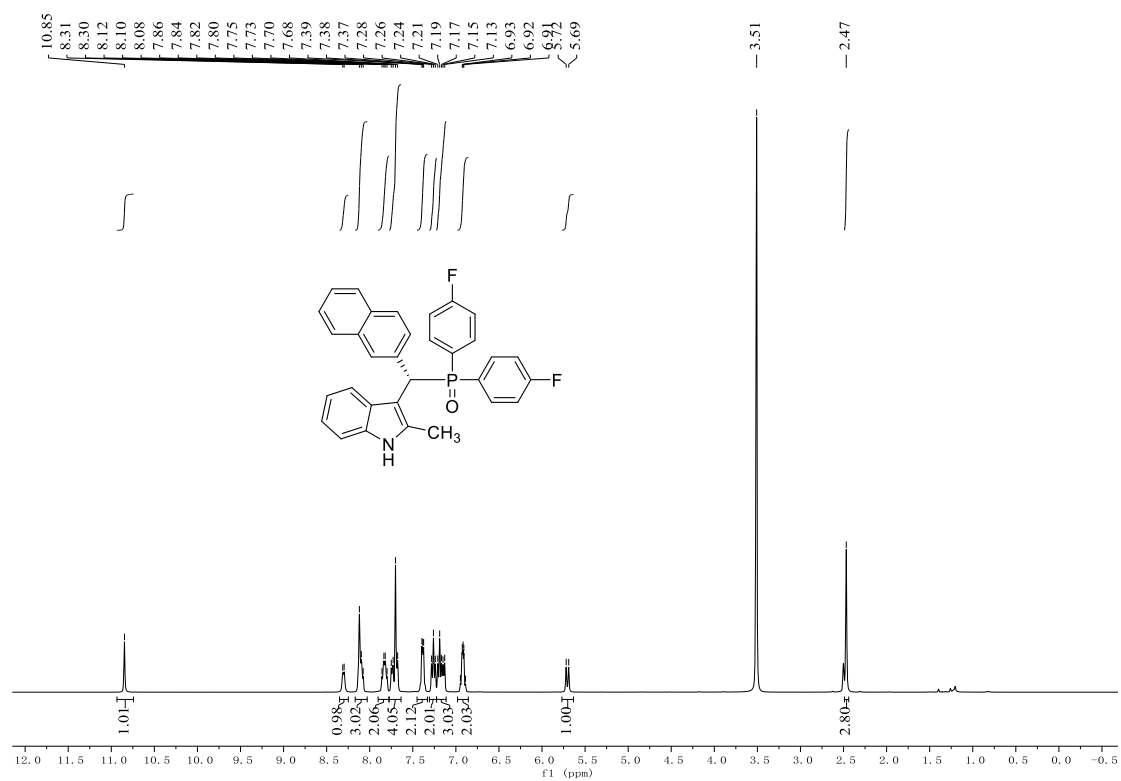

<sup>13</sup>C NMR spectrum of compound of 3c`

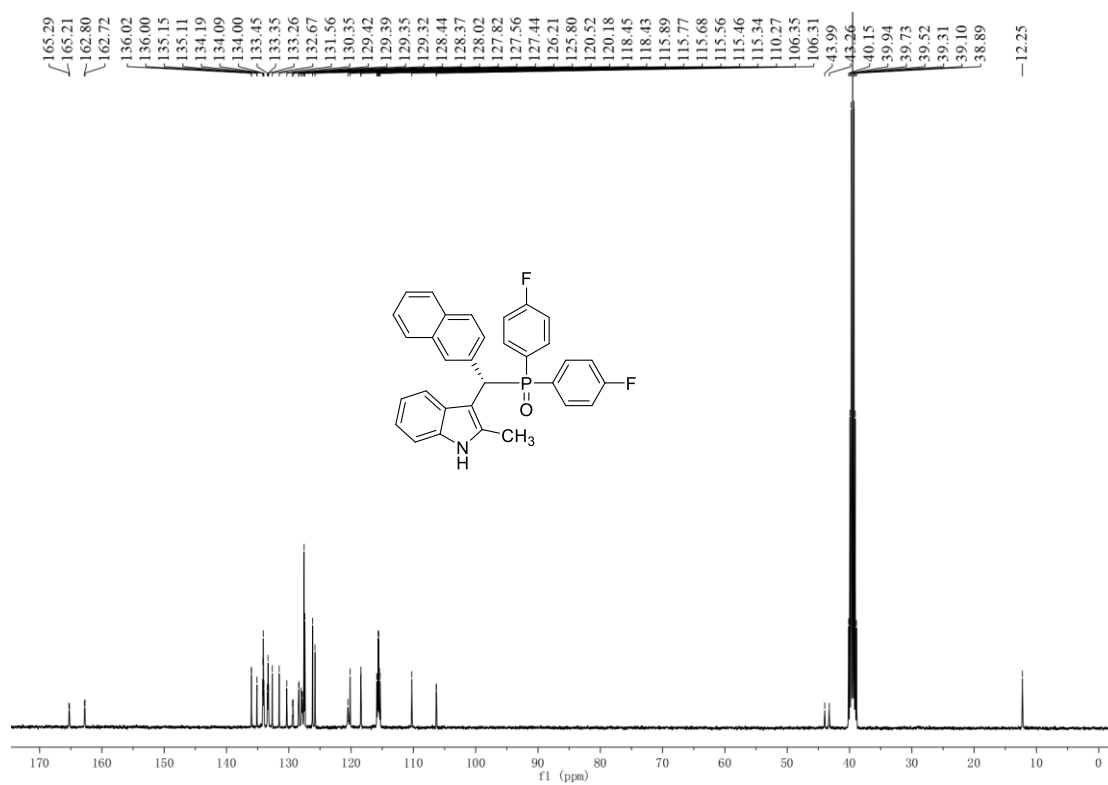

**$^{31}\text{P}$  NMR spectrum of compound of 3c'**

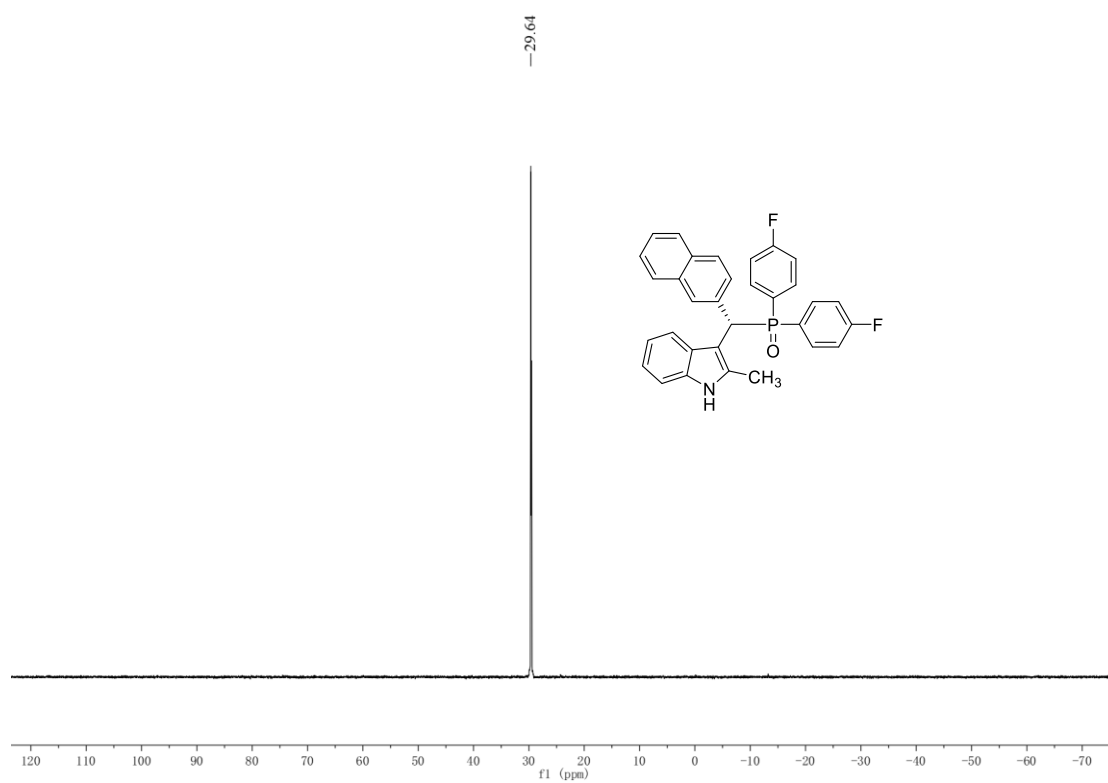

**$^{19}\text{F}$  NMR spectrum of compound of 3c'**

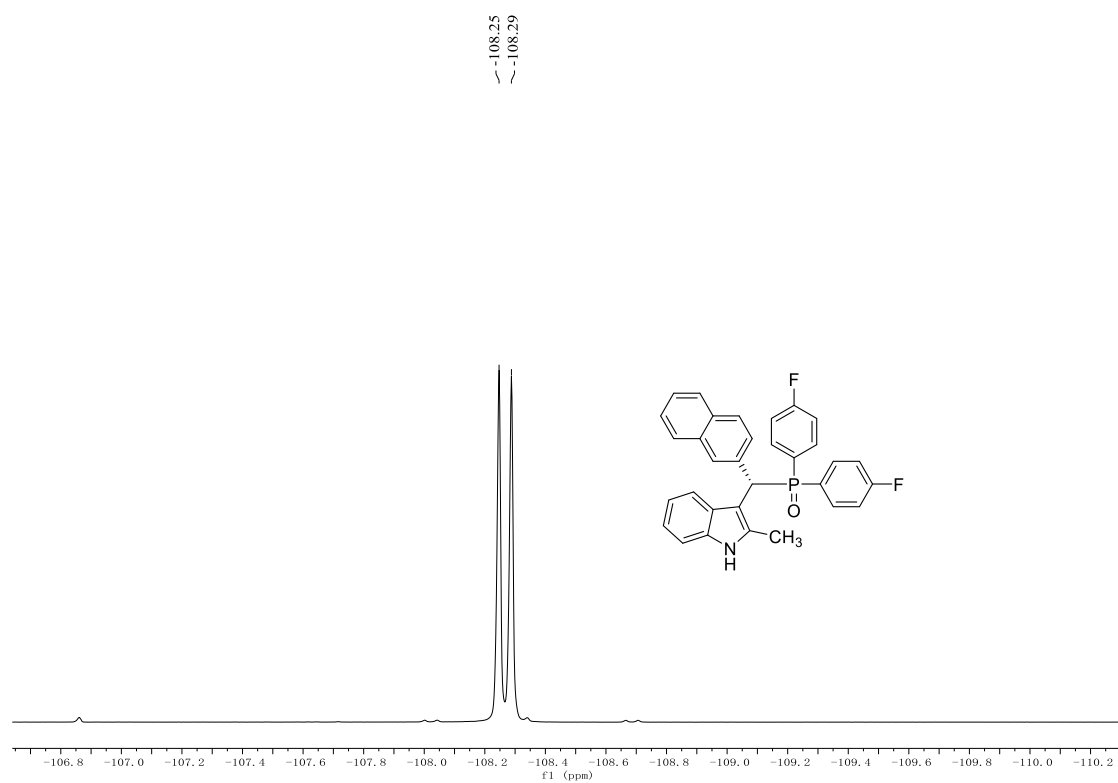

# HPLC spectra of 3c`

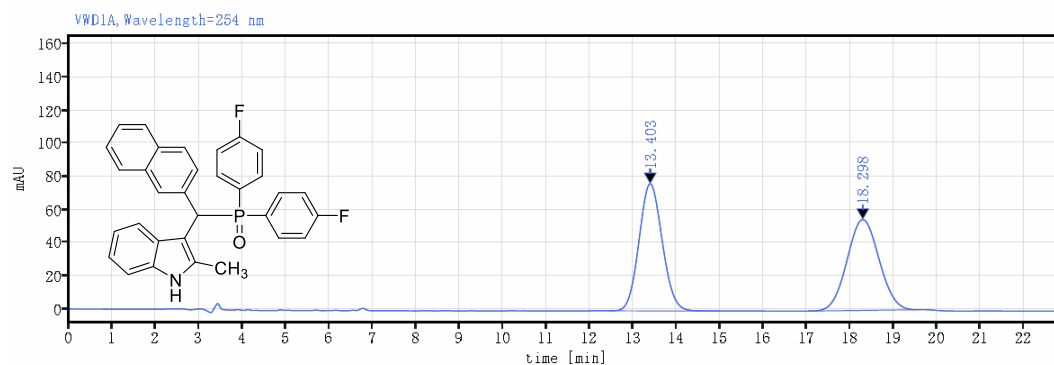

Detector VWD1A, Wavelength=254 nm

| Peak | Ret.Time [min] | Area    | Height | Area%  |
|------|----------------|---------|--------|--------|
|      | 13.403         | 2851.05 | 76.92  | 50.33  |
|      | 18.298         | 2813.38 | 54.95  | 49.67  |
|      |                | 5664.44 |        | 100.00 |

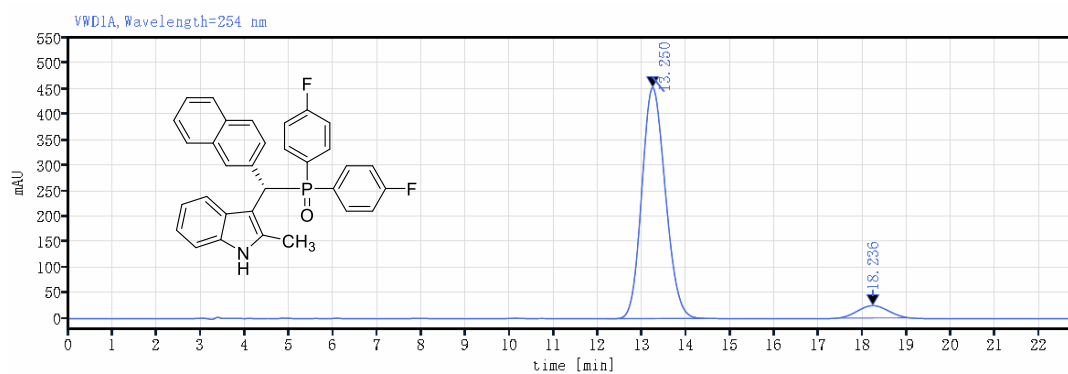

Detector VWD1A, Wavelength=254 nm

| Peak | Ret.Time [min] | Area     | Height | Area%  |
|------|----------------|----------|--------|--------|
|      | 13.250         | 16760.02 | 452.28 | 93.60  |
|      | 18.236         | 1145.47  | 24.03  | 6.40   |
|      |                | 17905.49 |        | 100.00 |



# <sup>1</sup>H NMR spectrum of compound of 3d`

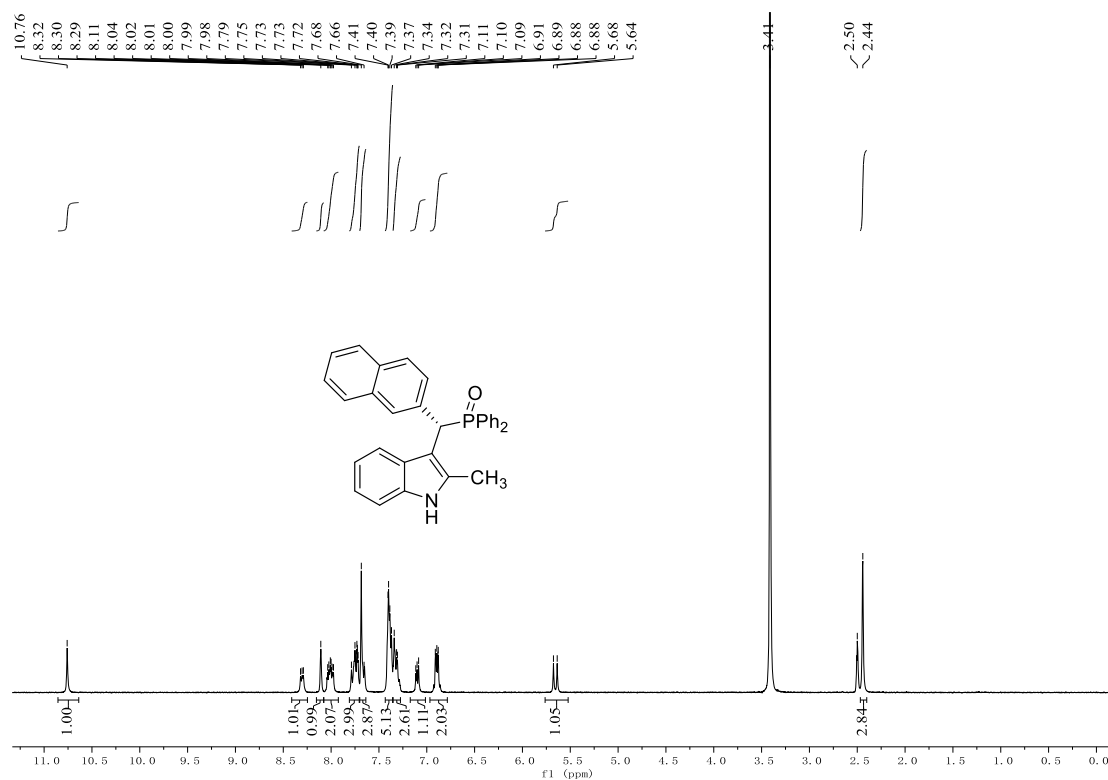

# <sup>13</sup>C NMR spectrum of compound of 3d`

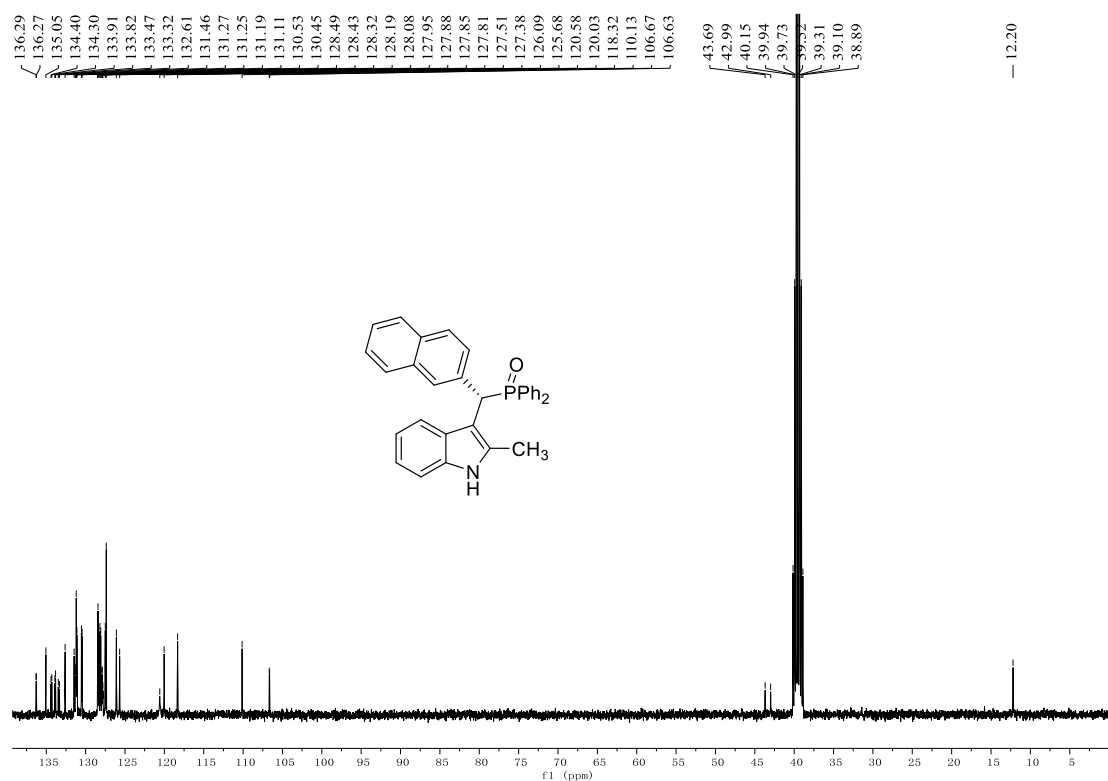

**$^{31}\text{P}$  NMR spectrum of compound of 3d`**

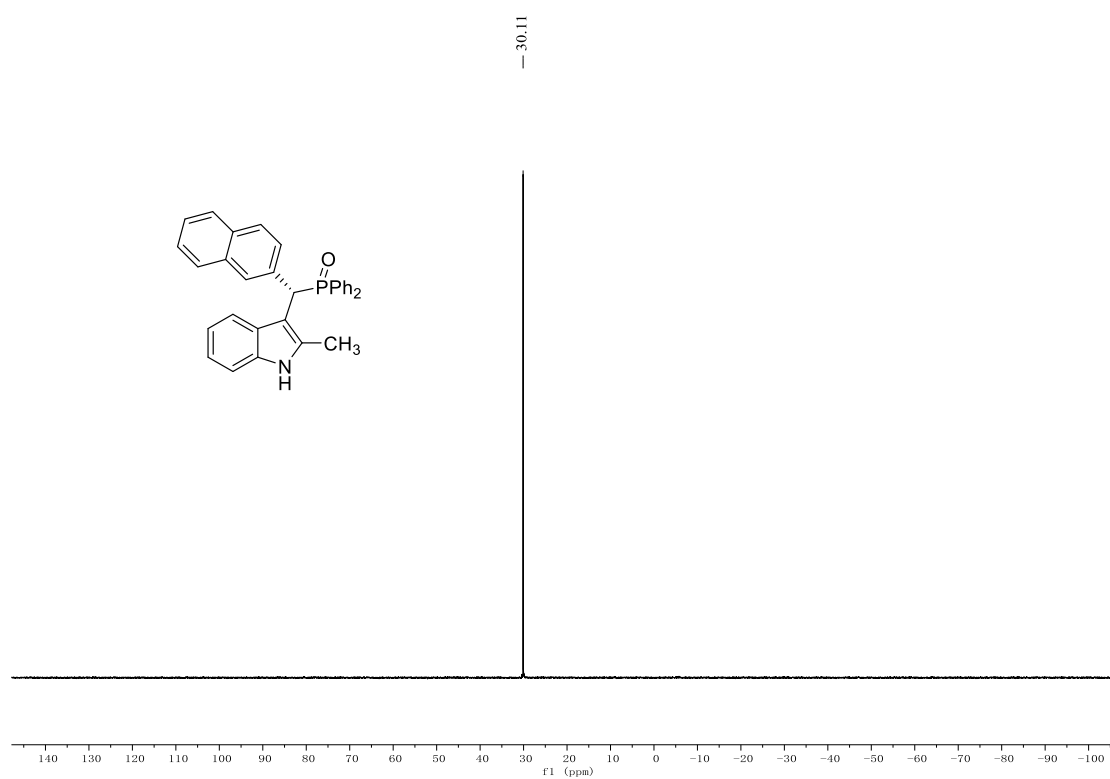

# HPLC spectra of 3d`

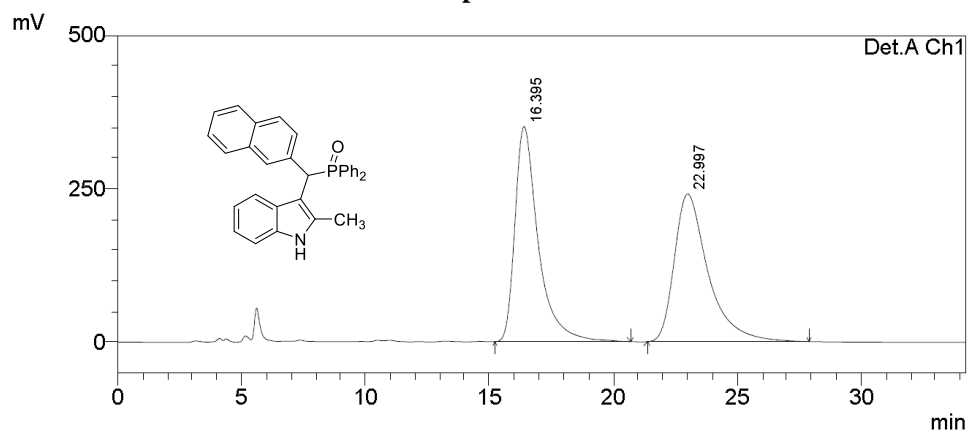

1 Det.A Ch1/254nm

PeakTable

Detector A Ch1 254nm

| Peak# | Ret. Time | Area     | Height | Area %  |
|-------|-----------|----------|--------|---------|
| 1     | 16.395    | 22910503 | 350204 | 50.112  |
| 2     | 22.997    | 22808415 | 240380 | 49.888  |
| Total |           | 45718918 |        | 100.000 |

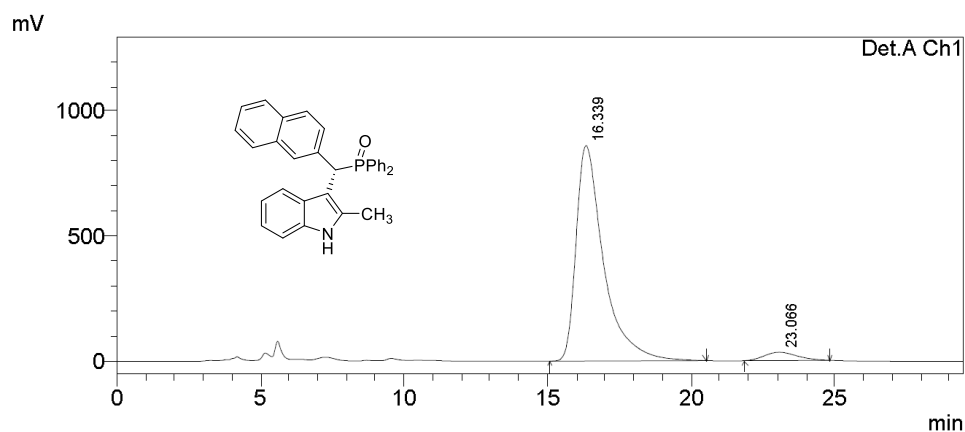

1 Det.A Ch1/254nm

PeakTable

Detector A Ch1 254nm

| Peak# | Ret. Time | Area     | Height | Area %  |
|-------|-----------|----------|--------|---------|
| 1     | 16.339    | 57395855 | 860938 | 95.633  |
| 2     | 23.066    | 2620900  | 32997  | 4.367   |
| Total |           | 60016754 |        | 100.000 |

Chemical structure of compound 10: Cc1c[nH]c2c(c1)C([C@H](C2)c3ccccc3)P(=O)(c4ccc(C)cc4)c5ccccc5

<sup>13</sup>C NMR spectrum (ppm):

- 142.68, 142.65, 141.05, 141.03, 140.99, 140.97, 136.59, 136.57, 135.07, 133.80, 133.71, 133.66, 131.47, 131.38, 131.16, 131.07, 130.53, 130.44, 129.54, 129.40, 129.04, 128.93, 128.80, 128.69, 128.57, 128.51, 127.94, 127.87, 127.54, 127.36, 126.06, 125.63, 120.65, 120.01, 118.32, 110.13, 106.99, 106.95, 43.76, 43.06, 40.15, 39.94, 39.73, 39.32, 39.31, 39.10, 38.89, 20.96, 12.27

**$^{31}\text{P}$  NMR spectrum of compound of 3e`**

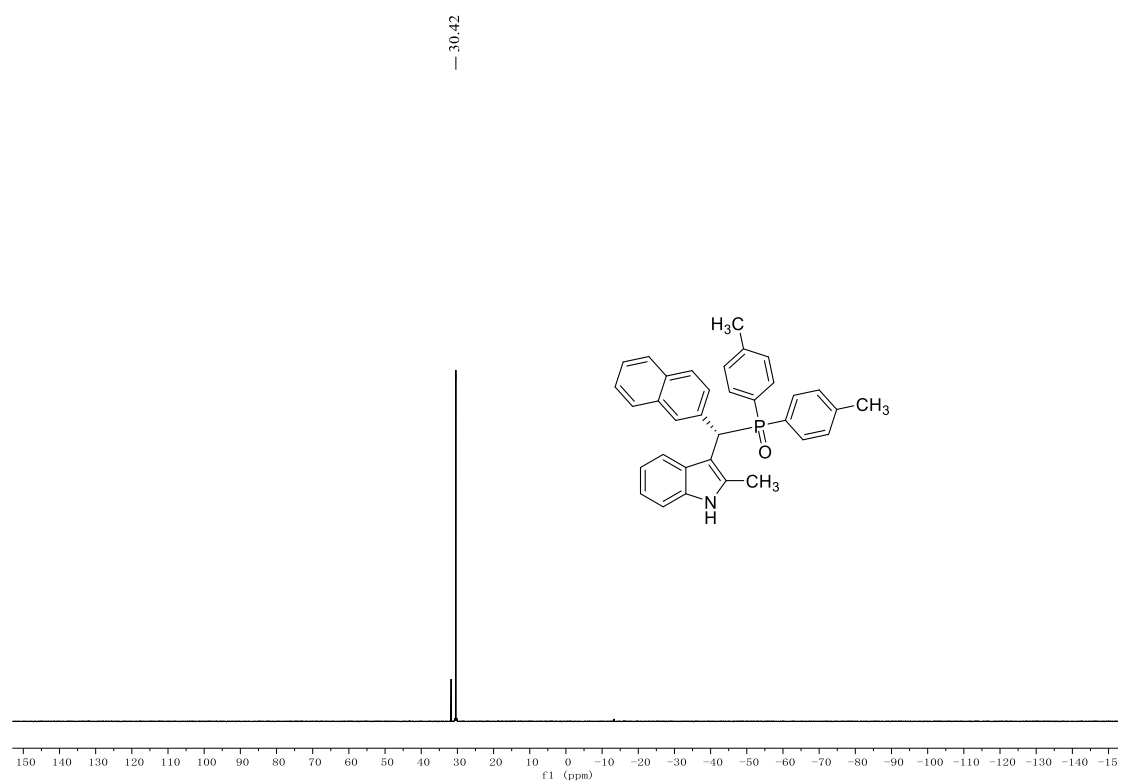

## HPLC spectra of 3e`

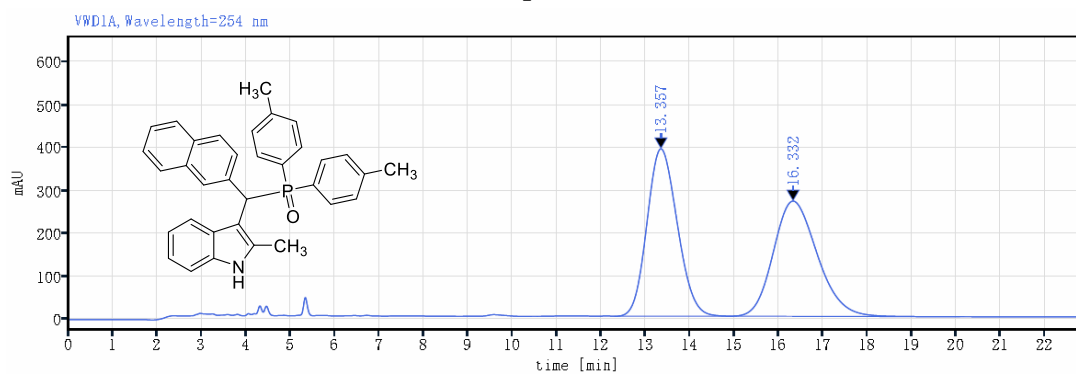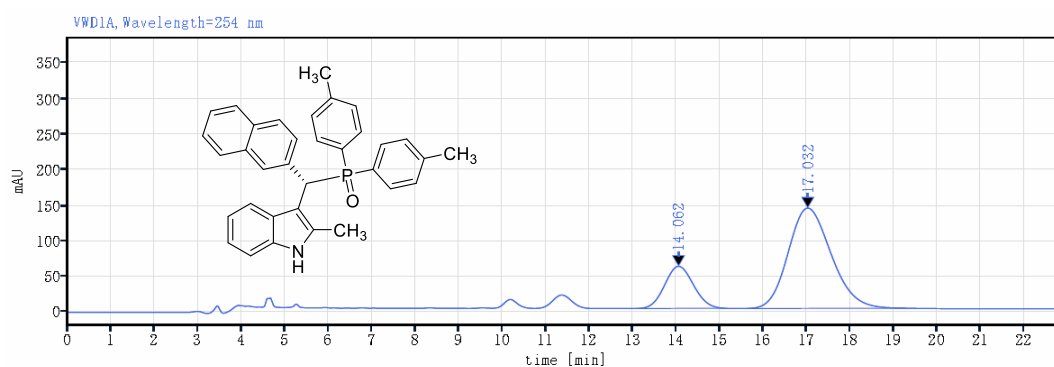

Detector VWD1A, Wavelength=254 nm

| Peak | Ret. Time [min] | Area     | Height | Area%  |
|------|-----------------|----------|--------|--------|
|      | 14.062          | 2710.80  | 59.07  | 21.91  |
|      | 17.032          | 9660.43  | 140.85 | 78.09  |
|      |                 | 12371.23 |        | 100.00 |

**<sup>1</sup>H NMR spectrum of compound of 3f (isomer 1)**

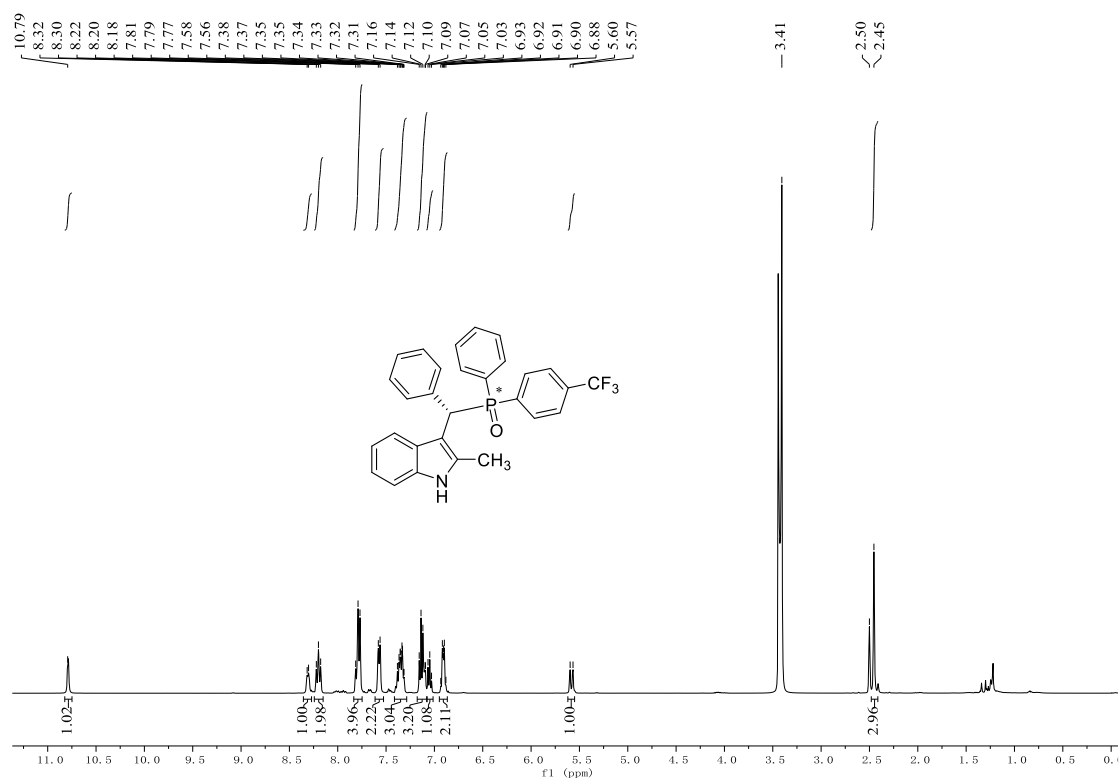

**<sup>13</sup>C NMR spectrum of compound of 3f (isomer 1)**

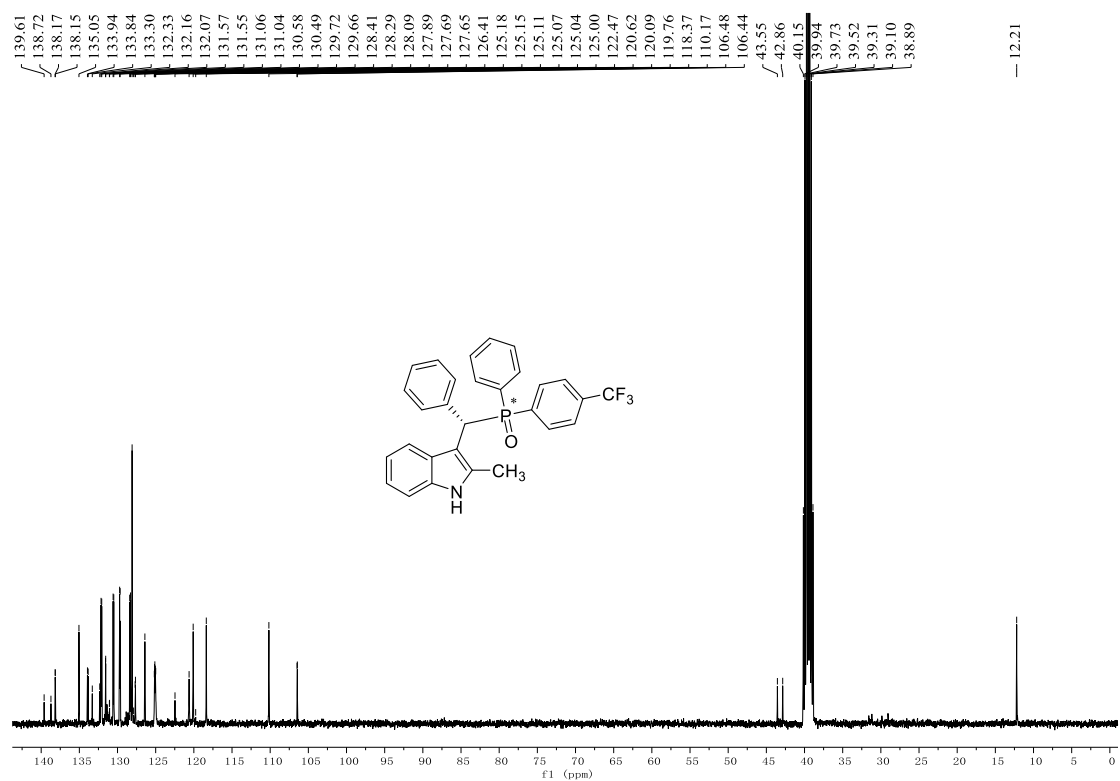

**<sup>31</sup>P NMR spectrum of compound of 3f (isomer 1)**

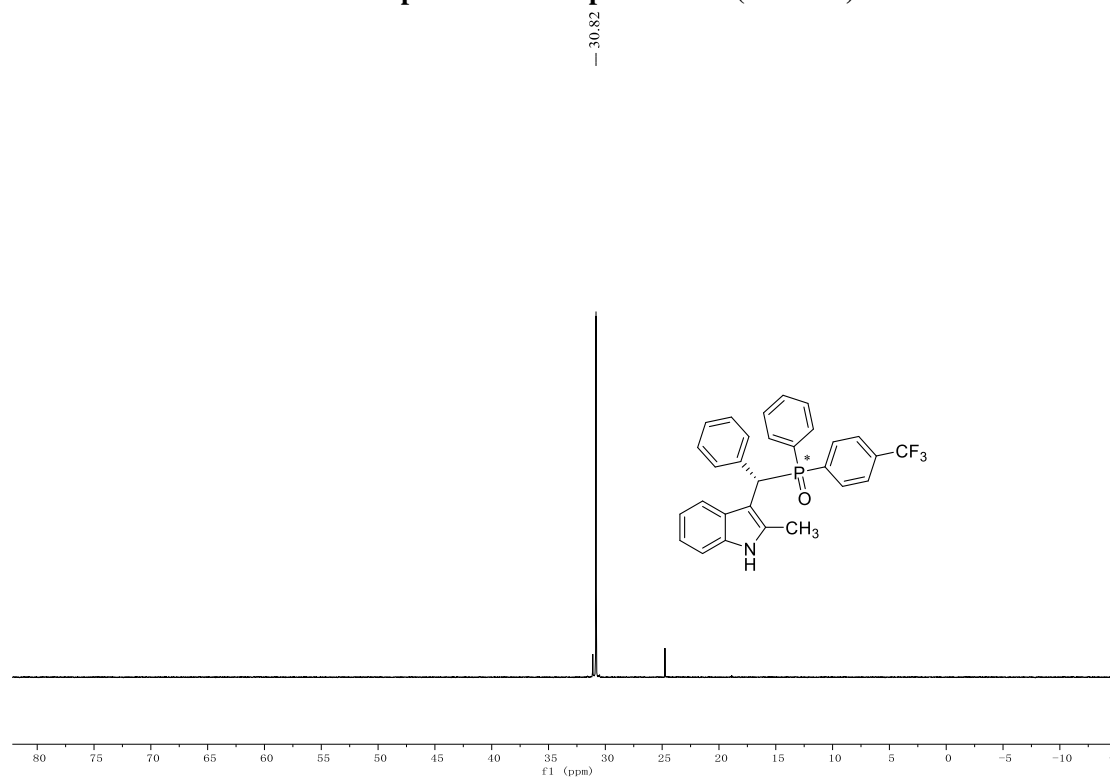

**<sup>19</sup>F NMR spectrum of compound of 3f (isomer 1)**

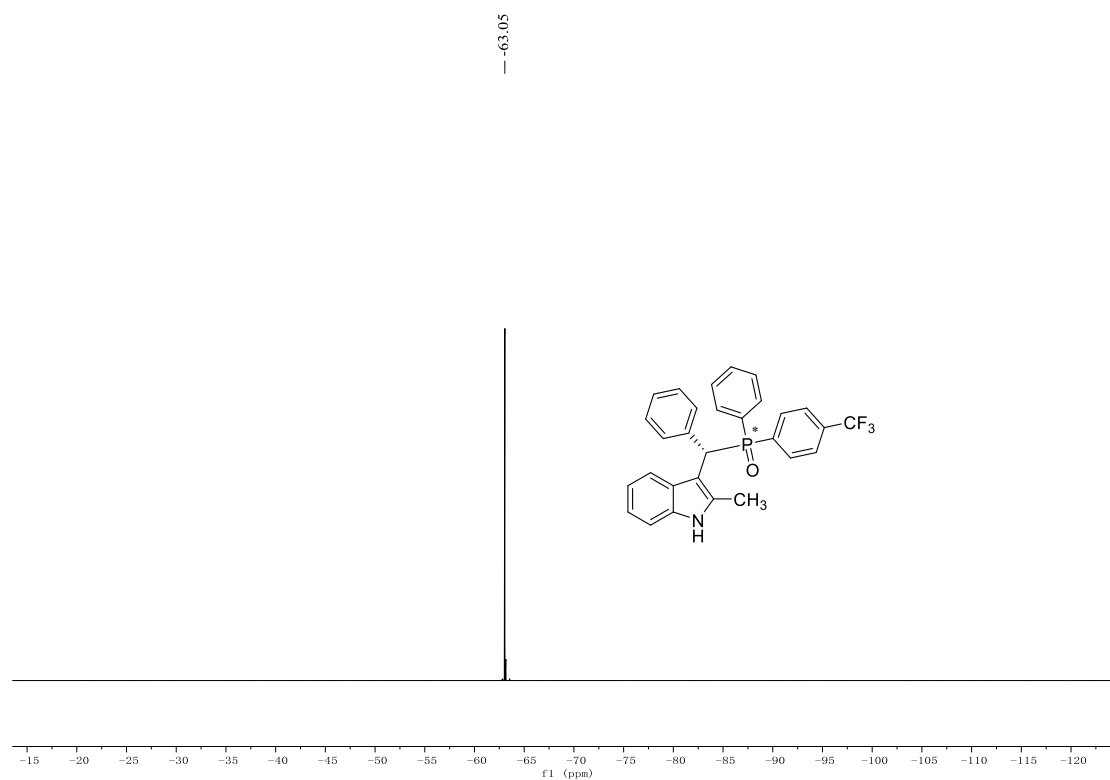



**<sup>1</sup>H NMR spectrum of compound of 3f (isomer 2)**

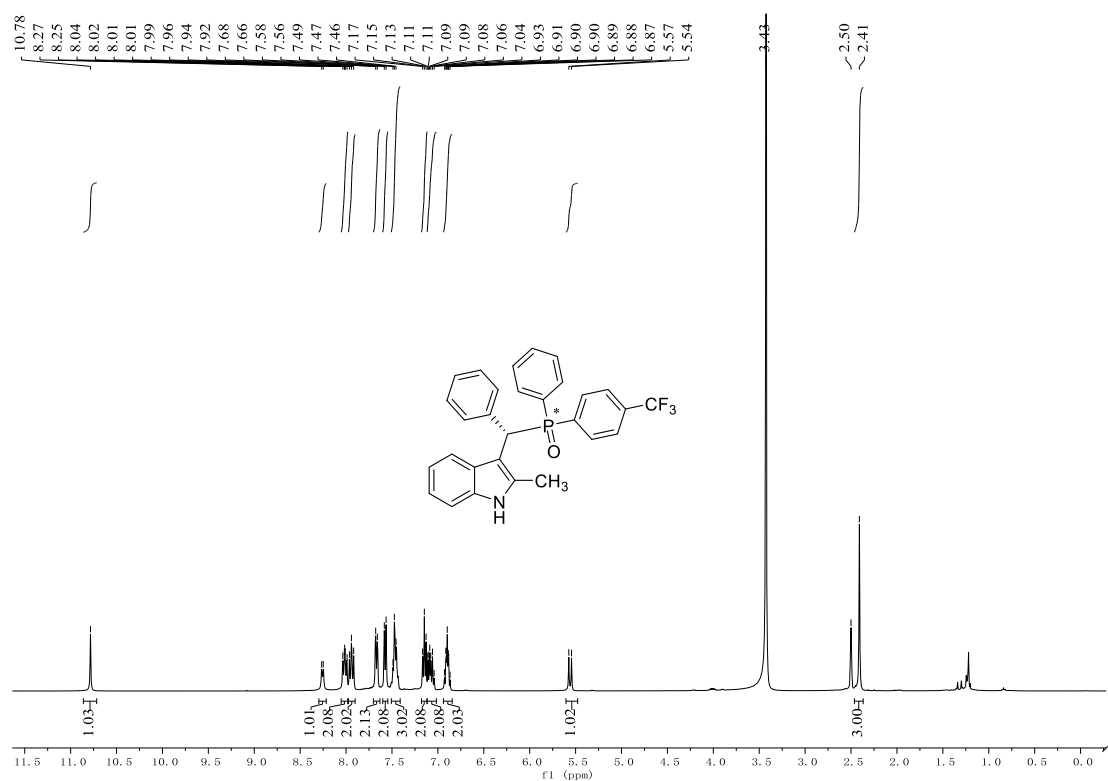

**<sup>13</sup>C NMR spectrum of compound of 3f (isomer 2)**

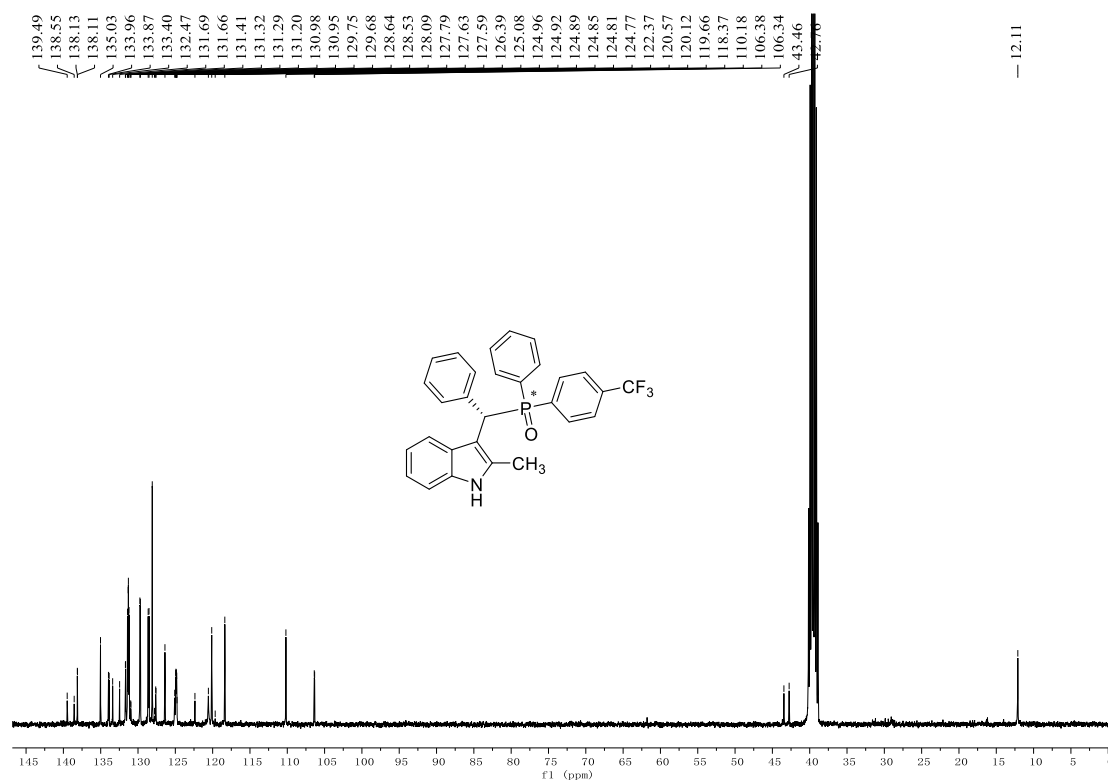

**$^{31}\text{P}$  NMR spectrum of compound of 3f (isomer 2)**

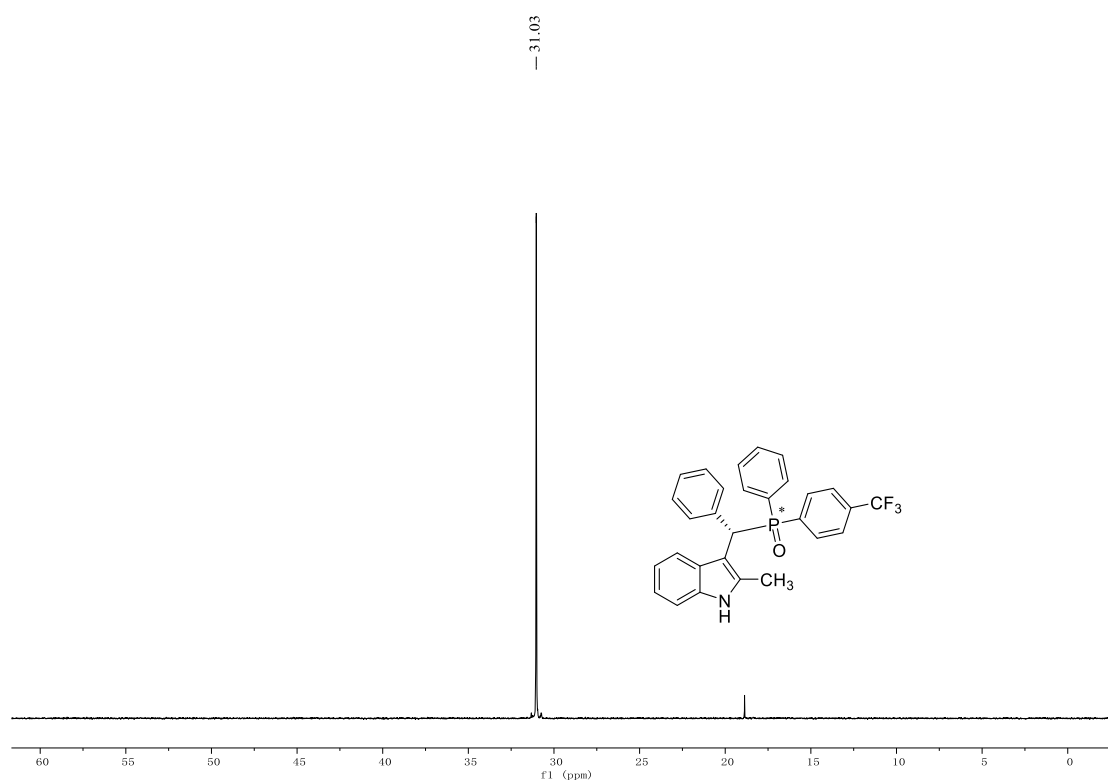

**$^{19}\text{F}$  NMR spectrum of compound of 3f (isomer 2)**

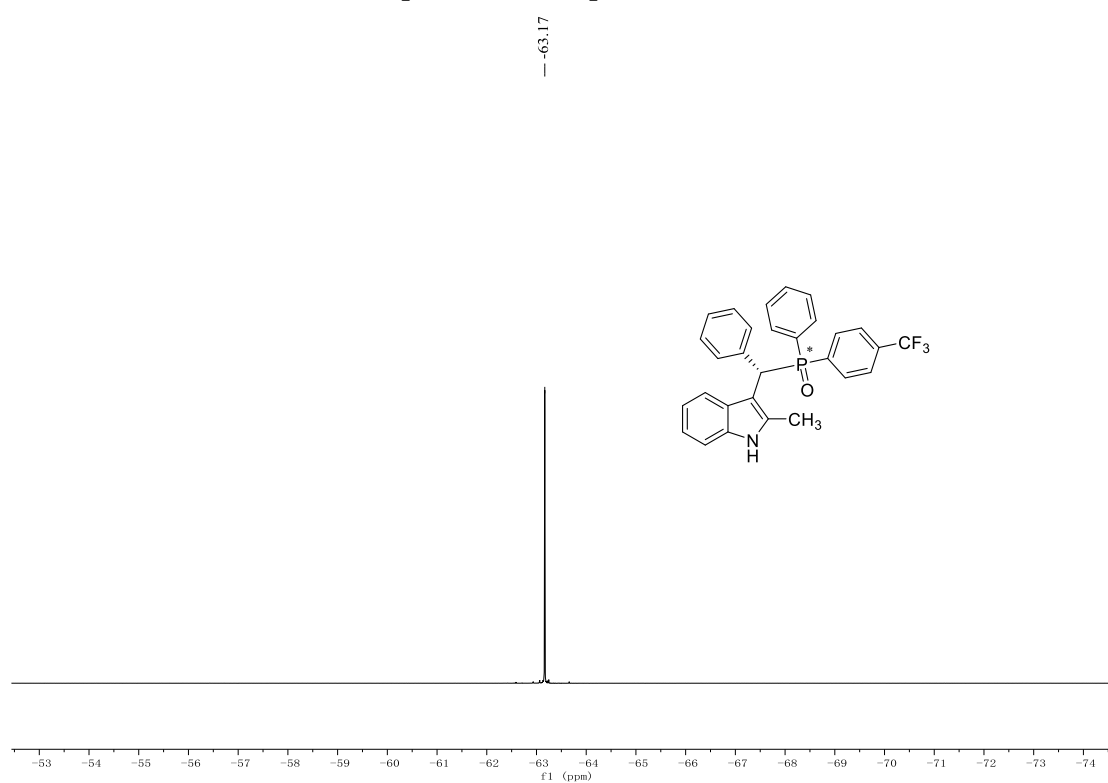

## HPLC spectra of 3f (isomer 1)

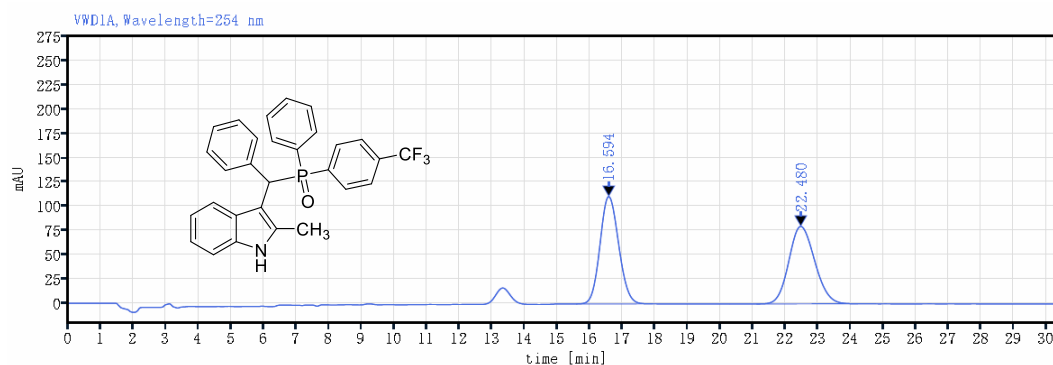

Detector VWD1A, Wavelength=254 nm

| Peak | Ret. Time [min] | Area    | Height | Area%  |
|------|-----------------|---------|--------|--------|
|      | 16.594          | 4407.04 | 110.85 | 49.97  |
|      | 22.480          | 4412.62 | 80.04  | 50.03  |
|      |                 | 8819.66 |        | 100.00 |

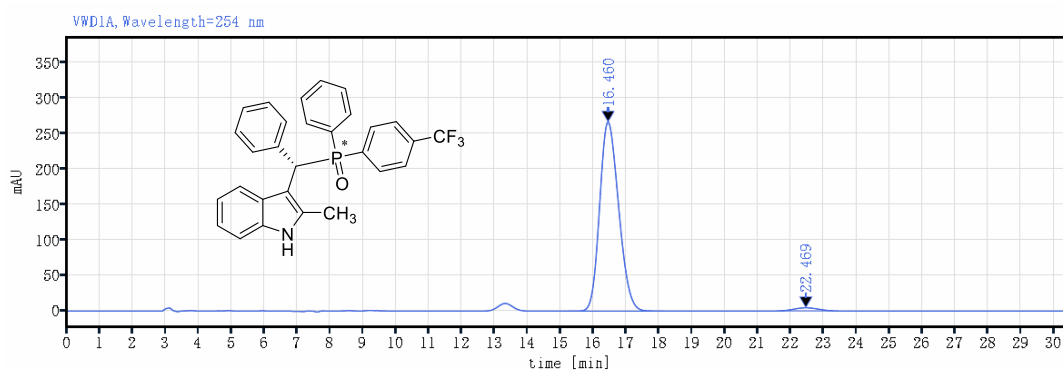

Detector VWD1A, Wavelength=254 nm

| Peak | Ret. Time [min] | Area     | Height | Area%  |
|------|-----------------|----------|--------|--------|
|      | 16.460          | 10703.62 | 266.67 | 98.06  |
|      | 22.469          | 211.84   | 4.32   | 1.94   |
|      |                 | 10915.46 |        | 100.00 |

## HPLC spectra of 3f (isomer 2)

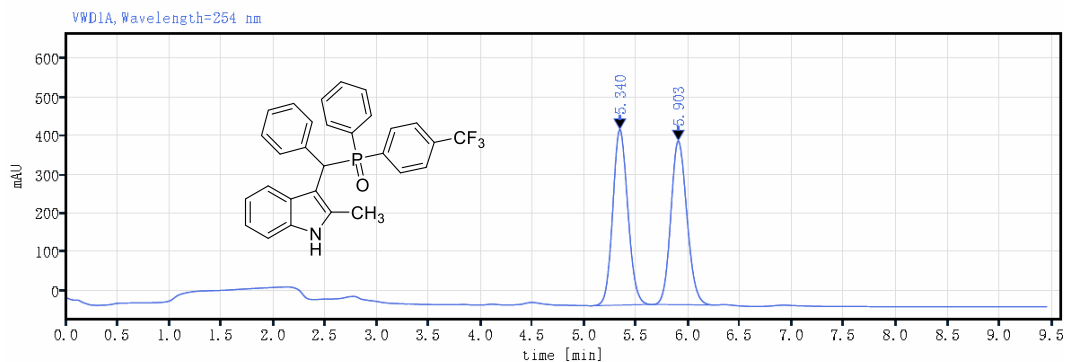

Detector VWD1A, Wavelength=254 nm

| Peak | Ret.Time [min] | Area    | Height | Area%  |
|------|----------------|---------|--------|--------|
|      | 5.340          | 4580.27 | 453.26 | 50.10  |
|      | 5.903          | 4561.89 | 422.84 | 49.90  |
|      |                | 9142.15 |        | 100.00 |

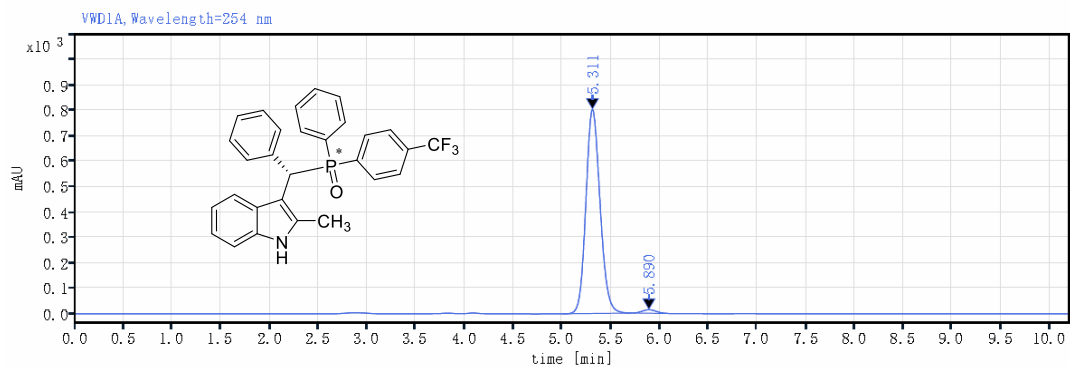

Detector VWD1A, Wavelength=254 nm

| Peak | Ret.Time [min] | Area    | Height | Area%  |
|------|----------------|---------|--------|--------|
|      | 5.311          | 8131.50 | 803.39 | 98.36  |
|      | 5.890          | 135.29  | 13.76  | 1.64   |
|      |                | 8266.79 |        | 100.00 |
